# Supplementary material
Source: HighWire-hosted journal article supplement (https://jitc.bmj.com/content/9/3/e001506)
Supplement: inline-supplementary-material-2 [file inline-supplementary-material-2.xlsx]

## Sheet: S1 Genesets
Probeset	ENTREZ	LocusLink	Symbol	IRIS_Most_Specific	Geneset_CD3TCR	Geneset_ELVIDGE_HIF1A_TARGETS_DN	Geneset_ccRCC	Geneset_Fuhrman	Geneset_Ascierto	Geneset_IMmotion150	Geneset_TIS	Geneset_RIG1	Geneset_CM009	Geneset_Adenosine	Geneset_EMTstroma	Geneset_Javelin	Geneset_HALLMARK
916_at	916	LOC916	CD3E	T Cell	Tcell_Receptor	NA	NA	NA	NA	NA	NA	NA	CM009_up	NA	NA	Javelin26	NA NA
919_at	919	LOC919	CD247	Lymphoid	Tcell_Receptor	NA	NA	NA	NA	NA	NA	NA	NA	NA	NA	Javelin26	NA NA
917_at	917	LOC917	CD3G	T Cell	Tcell_Receptor	NA	NA	NA	NA	NA	NA	NA	NA	NA	NA	Javelin26	NA NA
915_at	915	LOC915	CD3D	T Cell	Tcell_Receptor	NA	NA	NA	NA	NA	NA	NA	NA	NA	NA	NA	NA NA
28638_at	28638	LOC28638	TRBC2	T Cell	Tcell_Receptor	NA	NA	NA	NA	NA	NA	NA	NA	NA	NA	NA	NA NA
28755_at	28755	LOC28755	TRAC	T Cell	Tcell_Receptor	NA	NA	NA	NA	NA	NA	NA	NA	NA	NA	NA	NA NA
3669_at	3669	LOC3669	ISG20	NA	NA	91_DN	NA	NA	NA	NA	NA	NA	NA	NA	NA	NA	IFNG IFNA
10628_at	10628	LOC10628	TXNIP	NA	NA	NA	NA	NA	DOWN	NA	NA	NA	NA	NA	NA	NA	IFNG IFNA
841_at	841	LOC841	CASP8	Multiple	NA	NA	NA	NA	NA	NA	NA	cluster1	NA	NA	NA	NA	IFNG IFNA
64135_at	64135	LOC64135	IFIH1	Dendritic Cell	NA	NA	NA	NA	NA	NA	NA	cluster1	NA	NA	NA	NA	IFNG IFNA
7706_at	7706	LOC7706	TRIM25	Myeloid	NA	NA	NA	NA	NA	NA	NA	cluster1	NA	NA	NA	NA	IFNG IFNA
3627_at	3627	LOC3627	CXCL10	Multiple	NA	NA	NA	NA	NA	NA	NA	cluster2	NA	NA	NA	NA	IFNG IFNA
79132_at	79132	LOC79132	DHX58	NA	NA	NA	NA	NA	NA	NA	NA	cluster3	NA	NA	NA	NA	IFNG IFNA
3665_at	3665	LOC3665	IRF7	Multiple	NA	NA	NA	NA	NA	NA	NA	cluster3	NA	NA	NA	NA	IFNG IFNA
9636_at	9636	LOC9636	ISG15	NA	NA	NA	NA	NA	NA	NA	NA	cluster3	NA	NA	NA	NA	IFNG IFNA
3659_at	3659	LOC3659	IRF1	Multiple	NA	NA	NA	NA	NA	NA	NA	NA	CM009_up	NA	NA	NA	IFNG IFNA
834_at	834	LOC834	CASP1	Monocyte	NA	NA	NA	NA	NA	NA	NA	NA	NA	NA	NA	NA	IFNG IFNA
972_at	972	LOC972	CD74	Multiple	NA	NA	NA	NA	NA	NA	NA	NA	NA	NA	NA	NA	IFNG IFNA
129607_at	129607	LOC129607	CMPK2	Myeloid	NA	NA	NA	NA	NA	NA	NA	NA	NA	NA	NA	NA	IFNG IFNA
6373_at	6373	LOC6373	CXCL11	Dendritic Cell	NA	NA	NA	NA	NA	NA	NA	NA	NA	NA	NA	NA	IFNG IFNA
3430_at	3430	LOC3430	IFI35	Multiple	NA	NA	NA	NA	NA	NA	NA	NA	NA	NA	NA	NA	IFNG IFNA
10561_at	10561	LOC10561	IFI44	Multiple	NA	NA	NA	NA	NA	NA	NA	NA	NA	NA	NA	NA	IFNG IFNA
10964_at	10964	LOC10964	IFI44L	Multiple	NA	NA	NA	NA	NA	NA	NA	NA	NA	NA	NA	NA	IFNG IFNA
3433_at	3433	LOC3433	IFIT2	Myeloid	NA	NA	NA	NA	NA	NA	NA	NA	NA	NA	NA	NA	IFNG IFNA
3437_at	3437	LOC3437	IFIT3	Multiple	NA	NA	NA	NA	NA	NA	NA	NA	NA	NA	NA	NA	IFNG IFNA
3600_at	3600	LOC3600	IL15	Myeloid	NA	NA	NA	NA	NA	NA	NA	NA	NA	NA	NA	NA	IFNG IFNA
3566_at	3566	LOC3566	IL4R	Multiple	NA	NA	NA	NA	NA	NA	NA	NA	NA	NA	NA	NA	IFNG IFNA
3660_at	3660	LOC3660	IRF2	Multiple	NA	NA	NA	NA	NA	NA	NA	NA	NA	NA	NA	NA	IFNG IFNA
4599_at	4599	LOC4599	MX1	Dendritic Cell	NA	NA	NA	NA	NA	NA	NA	NA	NA	NA	NA	NA	IFNG IFNA
9111_at	9111	LOC9111	NMI	Multiple	NA	NA	NA	NA	NA	NA	NA	NA	NA	NA	NA	NA	IFNG IFNA
54625_at	54625	LOC54625	PARP14	Multiple	NA	NA	NA	NA	NA	NA	NA	NA	NA	NA	NA	NA	IFNG IFNA
8767_at	8767	LOC8767	RIPK2	Myeloid	NA	NA	NA	NA	NA	NA	NA	NA	NA	NA	NA	NA	IFNG IFNA
91543_at	91543	LOC91543	RSAD2	Myeloid	NA	NA	NA	NA	NA	NA	NA	NA	NA	NA	NA	NA	IFNG IFNA
219285_at	219285	LOC219285	SAMD9L	Multiple	NA	NA	NA	NA	NA	NA	NA	NA	NA	NA	NA	NA	IFNG IFNA
3431_at	3431	LOC3431	SP110	Multiple	NA	NA	NA	NA	NA	NA	NA	NA	NA	NA	NA	NA	IFNG IFNA
6890_at	6890	LOC6890	TAP1	Multiple	NA	NA	NA	NA	NA	NA	NA	NA	NA	NA	NA	NA	IFNG IFNA
10906_at	10906	LOC10906	TRAFD1	Dendritic Cell	NA	NA	NA	NA	NA	NA	NA	NA	NA	NA	NA	NA	IFNG IFNA
3123_at	3123	LOC3123	HLA-DRB1	NA	NA	91_DN	NA	NA	NA	NA	Merck_Up	NA	NA	NA	NA	NA	IFNG NA
7130_at	7130	LOC7130	TNFAIP6	Myeloid	NA	NA	ccrcc2.up	NA	NA	NA	NA	NA	NA	NA	NA	NA	IFNG NA
29126_at	29126	LOC29126	CD274	Myeloid	NA	NA	ccrcc4.up	NA	NA	McDermott_Teff	Merck_Up	NA	NA	NA	NA	NA	IFNG NA
952_at	952	LOC952	CD38	Multiple	NA	NA	ccrcc4.up	NA	NA	NA	NA	NA	NA	NA	NA	NA	IFNG NA
3620_at	3620	LOC3620	IDO1	Myeloid	NA	NA	NA	Up	NA	NA	Merck_Up	NA	NA	NA	NA	NA	IFNG NA
6648_at	6648	LOC6648	SOD2	Myeloid	NA	NA	NA	Up	NA	NA	NA	NA	NA	NA	NA	NA	IFNG NA
5770_at	5770	LOC5770	PTPN1	Multiple	NA	NA	NA	NA	DOWN	NA	NA	NA	NA	NA	NA	NA	IFNG NA
10068_at	10068	LOC10068	IL18BP	NA	NA	NA	NA	NA	UP	NA	NA	NA	NA	NA	NA	NA	IFNG NA
3569_at	3569	LOC3569	IL6	Monocyte	NA	NA	NA	NA	NA	McDermott_Myeloid	NA	NA	NA	Nano	NA	NA	IFNG NA
5743_at	5743	LOC5743	PTGS2	Myeloid	NA	NA	NA	NA	NA	McDermott_Myeloid	NA	NA	NA	Nano_RNAseq	NA	NA	IFNG NA
6352_at	6352	LOC6352	CCL5	Multiple	NA	NA	NA	NA	NA	NA	Merck_Up	NA	NA	NA	NA	Javelin26	IFNG NA
1240_at	1240	LOC1240	CMKLR1	NA	NA	NA	NA	NA	NA	NA	Merck_Up	NA	NA	NA	NA	NA	IFNG NA
4283_at	4283	LOC4283	CXCL9	Multiple	NA	NA	NA	NA	NA	NA	Merck_Up	NA	NA	NA	NA	NA	IFNG NA
3117_at	3117	LOC3117	HLA-DQA1	NA	NA	NA	NA	NA	NA	NA	Merck_Up	NA	NA	NA	NA	NA	IFNG NA
5699_at	5699	LOC5699	PSMB10	NA	NA	NA	NA	NA	NA	NA	Merck_Up	NA	NA	NA	NA	NA	IFNG NA
6772_at	6772	LOC6772	STAT1	Multiple	NA	NA	NA	NA	NA	NA	Merck_Up	NA	NA	NA	NA	NA	IFNG NA
23586_at	23586	LOC23586	DDX58	NA	NA	NA	NA	NA	NA	NA	NA	cluster1	NA	NA	NA	NA	IFNG NA
4790_at	4790	LOC4790	NFKB1	Multiple	NA	NA	NA	NA	NA	NA	NA	cluster1	NA	NA	NA	NA	IFNG NA
8737_at	8737	LOC8737	RIPK1	NA	NA	NA	NA	NA	NA	NA	NA	cluster1	NA	NA	NA	NA	IFNG NA
4792_at	4792	LOC4792	NFKBIA	NA	NA	NA	NA	NA	NA	NA	NA	cluster2	NA	NA	NA	NA	IFNG NA
3601_at	3601	LOC3601	IL15RA	NA	NA	NA	NA	NA	NA	NA	NA	NA	CM009_up	NA	NA	NA	IFNG NA
5292_at	5292	LOC5292	PIM1	Multiple	NA	NA	NA	NA	NA	NA	NA	NA	CM009_up	NA	NA	NA	IFNG NA
942_at	942	LOC942	CD86	Dendritic Cell	NA	NA	NA	NA	NA	NA	NA	NA	NA	Nano	NA	NA	IFNG NA
2841_at	2841	LOC2841	GPR18	Lymphoid	NA	NA	NA	NA	NA	NA	NA	NA	NA	NA	NA	Javelin26	IFNG NA
55016_at	55016	LOC55016	2020-03-01	Multiple	NA	NA	NA	NA	NA	NA	NA	NA	NA	NA	NA	NA	IFNG NA
55024_at	55024	LOC55024	BANK1	B Cell	NA	NA	NA	NA	NA	NA	NA	NA	NA	NA	NA	NA	IFNG NA
836_at	836	LOC836	CASP3	Multiple	NA	NA	NA	NA	NA	NA	NA	NA	NA	NA	NA	NA	IFNG NA
958_at	958	LOC958	CD40	Myeloid	NA	NA	NA	NA	NA	NA	NA	NA	NA	NA	NA	NA	IFNG NA
969_at	969	LOC969	CD69	Lymphoid	NA	NA	NA	NA	NA	NA	NA	NA	NA	NA	NA	NA	IFNG NA
1026_at	1026	LOC1026	CDKN1A	Myeloid	NA	NA	NA	NA	NA	NA	NA	NA	NA	NA	NA	NA	IFNG NA
1439_at	1439	LOC1439	CSF2RB	Multiple	NA	NA	NA	NA	NA	NA	NA	NA	NA	NA	NA	NA	IFNG NA
317649_at	317649	LOC317649	EIF4E3	Multiple	NA	NA	NA	NA	NA	NA	NA	NA	NA	NA	NA	NA	IFNG NA
355_at	355	LOC355	FAS	Multiple	NA	NA	NA	NA	NA	NA	NA	NA	NA	NA	NA	NA	IFNG NA
10875_at	10875	LOC10875	FGL2	Myeloid	NA	NA	NA	NA	NA	NA	NA	NA	NA	NA	NA	NA	IFNG NA
2357_at	2357	LOC2357	FPR1	Myeloid	NA	NA	NA	NA	NA	NA	NA	NA	NA	NA	NA	NA	IFNG NA
3001_at	3001	LOC3001	GZMA	Lymphoid	NA	NA	NA	NA	NA	NA	NA	NA	NA	NA	NA	NA	IFNG NA
3105_at	3105	LOC3105	HLA-A	Multiple	NA	NA	NA	NA	NA	NA	NA	NA	NA	NA	NA	NA	IFNG NA
3434_at	3434	LOC3434	IFIT1	Dendritic Cell	NA	NA	NA	NA	NA	NA	NA	NA	NA	NA	NA	NA	IFNG NA
3455_at	3455	LOC3455	IFNAR2	Multiple	NA	NA	NA	NA	NA	NA	NA	NA	NA	NA	NA	NA	IFNG NA
3587_at	3587	LOC3587	IL10RA	Multiple	NA	NA	NA	NA	NA	NA	NA	NA	NA	NA	NA	NA	IFNG NA
3560_at	3560	LOC3560	IL2RB	Lymphoid	NA	NA	NA	NA	NA	NA	NA	NA	NA	NA	NA	NA	IFNG NA
3662_at	3662	LOC3662	IRF4	Multiple	NA	NA	NA	NA	NA	NA	NA	NA	NA	NA	NA	NA	IFNG NA
3663_at	3663	LOC3663	IRF5	Myeloid	NA	NA	NA	NA	NA	NA	NA	NA	NA	NA	NA	NA	IFNG NA
3394_at	3394	LOC3394	IRF8	Multiple	NA	NA	NA	NA	NA	NA	NA	NA	NA	NA	NA	NA	IFNG NA
3695_at	3695	LOC3695	ITGB7	Lymphoid	NA	NA	NA	NA	NA	NA	NA	NA	NA	NA	NA	NA	IFNG NA
3937_at	3937	LOC3937	LCP2	Multiple	NA	NA	NA	NA	NA	NA	NA	NA	NA	NA	NA	NA	IFNG NA
10797_at	10797	LOC10797	MTHFD2	Multiple	NA	NA	NA	NA	NA	NA	NA	NA	NA	NA	NA	NA	IFNG NA
4600_at	4600	LOC4600	MX2	Multiple	NA	NA	NA	NA	NA	NA	NA	NA	NA	NA	NA	NA	IFNG NA
10135_at	10135	LOC10135	NAMPT	Myeloid	NA	NA	NA	NA	NA	NA	NA	NA	NA	NA	NA	NA	IFNG NA
8202_at	8202	LOC8202	NCOA3	Multiple	NA	NA	NA	NA	NA	NA	NA	NA	NA	NA	NA	NA	IFNG NA
84166_at	84166	LOC84166	NLRC5	Multiple	NA	NA	NA	NA	NA	NA	NA	NA	NA	NA	NA	NA	IFNG NA
4939_at	4939	LOC4939	OAS2	Multiple	NA	NA	NA	NA	NA	NA	NA	NA	NA	NA	NA	NA	IFNG NA
4940_at	4940	LOC4940	OAS3	Multiple	NA	NA	NA	NA	NA	NA	NA	NA	NA	NA	NA	NA	IFNG NA
5142_at	5142	LOC5142	PDE4B	Multiple	NA	NA	NA	NA	NA	NA	NA	NA	NA	NA	NA	NA	IFNG NA
57162_at	57162	LOC57162	PELI1	Multiple	NA	NA	NA	NA	NA	NA	NA	NA	NA	NA	NA	NA	IFNG NA
5690_at	5690	LOC5690	PSMB2	Multiple	NA	NA	NA	NA	NA	NA	NA	NA	NA	NA	NA	NA	IFNG NA
5777_at	5777	LOC5777	PTPN6	Multiple	NA	NA	NA	NA	NA	NA	NA	NA	NA	NA	NA	NA	IFNG NA
57674_at	57674	LOC57674	RNF213	Multiple	NA	NA	NA	NA	NA	NA	NA	NA	NA	NA	NA	NA	IFNG NA
25939_at	25939	LOC25939	SAMHD1	Multiple	NA	NA	NA	NA	NA	NA	NA	NA	NA	NA	NA	NA	IFNG NA
57823_at	57823	LOC57823	SLAMF7	Multiple	NA	NA	NA	NA	NA	NA	NA	NA	NA	NA	NA	NA	IFNG NA
8651_at	8651	LOC8651	SOCS1	Multiple	NA	NA	NA	NA	NA	NA	NA	NA	NA	NA	NA	NA	IFNG NA
7903_at	7903	LOC7903	ST8SIA4	Multiple	NA	NA	NA	NA	NA	NA	NA	NA	NA	NA	NA	NA	IFNG NA
6775_at	6775	LOC6775	STAT4	Lymphoid	NA	NA	NA	NA	NA	NA	NA	NA	NA	NA	NA	NA	IFNG NA
7127_at	7127	LOC7127	TNFAIP2	Myeloid	NA	NA	NA	NA	NA	NA	NA	NA	NA	NA	NA	NA	IFNG NA
7128_at	7128	LOC7128	TNFAIP3	Multiple	NA	NA	NA	NA	NA	NA	NA	NA	NA	NA	NA	NA	IFNG NA
7378_at	7378	LOC7378	UPP1	Multiple	NA	NA	NA	NA	NA	NA	NA	NA	NA	NA	NA	NA	IFNG NA
54739_at	54739	LOC54739	XAF1	Multiple	NA	NA	NA	NA	NA	NA	NA	NA	NA	NA	NA	NA	IFNG NA
6375_at	6375	LOC6375	XCL1	Lymphoid	NA	NA	NA	NA	NA	NA	NA	NA	NA	NA	NA	NA	IFNG NA
81030_at	81030	LOC81030	ZBP1	Lymphoid	NA	NA	NA	NA	NA	NA	NA	NA	NA	NA	NA	NA	IFNG NA
57169_at	57169	LOC57169	ZNFX1	Dendritic Cell	NA	NA	NA	NA	NA	NA	NA	NA	NA	NA	NA	NA	IFNG NA
2766_at	2766	LOC2766	GMPR	NA	NA	NA	NA	Down	NA	NA	NA	NA	NA	NA	NA	NA	NA IFNA
2634_at	2634	LOC2634	GBP2	Multiple	NA	NA	NA	Up	NA	NA	NA	NA	NA	NA	NA	NA	NA IFNA
9034_at	9034	LOC9034	CCRL2	Monocyte	NA	NA	NA	NA	NA	NA	NA	NA	NA	NA	NA	NA	NA IFNA
1435_at	1435	LOC1435	CSF1	Multiple	NA	NA	NA	NA	NA	NA	NA	NA	NA	NA	NA	NA	NA IFNA
1997_at	1997	LOC1997	ELF1	Multiple	NA	NA	NA	NA	NA	NA	NA	NA	NA	NA	NA	NA	NA IFNA
8519_at	8519	LOC8519	IFITM1	Myeloid	NA	NA	NA	NA	NA	NA	NA	NA	NA	NA	NA	NA	NA IFNA
51667_at	51667	LOC51667	NUB1	Dendritic Cell	NA	NA	NA	NA	NA	NA	NA	NA	NA	NA	NA	NA	NA IFNA
4938_at	4938	LOC4938	OAS1	Dendritic Cell	NA	NA	NA	NA	NA	NA	NA	NA	NA	NA	NA	NA	NA IFNA
83666_at	83666	LOC83666	PARP9	Multiple	NA	NA	NA	NA	NA	NA	NA	NA	NA	NA	NA	NA	NA IFNA
54809_at	54809	LOC54809	SAMD9	Multiple	NA	NA	NA	NA	NA	NA	NA	NA	NA	NA	NA	NA	NA IFNA
6402_at	6402	LOC6402	SELL	Multiple	NA	NA	NA	NA	NA	NA	NA	NA	NA	NA	NA	NA	NA IFNA
4015_at	4015	LOC4015	LOX	NA	NA	91_DN	ccrcc3.dn	Up	NA	NA	NA	NA	NA	NA	EMTstroma	NA	NA NA
230_at	230	LOC230	ALDOC	NA	NA	91_DN	ccrcc3.dn	Up	NA	NA	NA	NA	NA	NA	NA	NA	NA NA
51129_at	51129	LOC51129	ANGPTL4	NA	NA	91_DN	ccrcc3.dn	NA	NA	McDermott_Angio	NA	NA	NA	NA	NA	NA	NA NA
768_at	768	LOC768	CA9	NA	NA	91_DN	ccrcc3.dn	NA	NA	NA	NA	NA	NA	NA	NA	NA	NA NA
857_at	857	LOC857	CAV1	NA	NA	91_DN	ccrcc3.dn	NA	NA	NA	NA	NA	NA	NA	NA	NA	NA NA
113146_at	113146	LOC113146	AHNAK2	NA	NA	91_DN	NA	Up	NA	NA	NA	NA	NA	NA	NA	NA	NA NA
55139_at	55139	LOC55139	ANKZF1	NA	NA	91_DN	NA	Up	NA	NA	NA	NA	NA	NA	NA	NA	NA NA
112399_at	112399	LOC112399	EGLN3	T Cell	NA	91_DN	NA	Up	NA	NA	NA	NA	NA	NA	NA	NA	NA NA
2026_at	2026	LOC2026	ENO2	NA	NA	91_DN	NA	Up	NA	NA	NA	NA	NA	NA	NA	NA	NA NA
29923_at	29923	LOC29923	HILPDA	NA	NA	91_DN	NA	Up	NA	NA	NA	NA	NA	NA	NA	NA	NA NA
3099_at	3099	LOC3099	HK2	NA	NA	91_DN	NA	Up	NA	NA	NA	NA	NA	NA	NA	NA	NA NA
51141_at	51141	LOC51141	INSIG2	NA	NA	91_DN	NA	Up	NA	NA	NA	NA	NA	NA	NA	NA	NA NA
4017_at	4017	LOC4017	LOXL2	NA	NA	91_DN	NA	Up	NA	NA	NA	NA	NA	NA	NA	NA	NA NA
10397_at	10397	LOC10397	NDRG1	NA	NA	91_DN	NA	Up	NA	NA	NA	NA	NA	NA	NA	NA	NA NA
5163_at	5163	LOC5163	PDK1	Lymphoid	NA	91_DN	NA	Up	NA	NA	NA	NA	NA	NA	NA	NA	NA NA
123_at	123	LOC123	PLIN2	NA	NA	91_DN	NA	Up	NA	NA	NA	NA	NA	NA	NA	NA	NA NA
8497_at	8497	LOC8497	PPFIA4	NA	NA	91_DN	NA	Up	NA	NA	NA	NA	NA	NA	NA	NA	NA NA
6676_at	6676	LOC6676	SPAG4	NA	NA	91_DN	NA	Up	NA	NA	NA	NA	NA	NA	NA	NA	NA NA
55076_at	55076	LOC55076	TMEM45A	NA	NA	91_DN	NA	Up	NA	NA	NA	NA	NA	NA	NA	NA	NA NA
133_at	133	LOC133	ADM	NA	NA	91_DN	NA	NA	NA	NA	NA	NA	NA	NA	NA	NA	NA NA
205_at	205	LOC205	AK4	NA	NA	91_DN	NA	NA	NA	NA	NA	NA	NA	NA	NA	NA	NA NA
283_at	283	LOC283	ANG	NA	NA	91_DN	NA	NA	NA	NA	NA	NA	NA	NA	NA	NA	NA NA
6310_at	6310	LOC6310	ATXN1	Myeloid	NA	91_DN	NA	NA	NA	NA	NA	NA	NA	NA	NA	NA	NA NA
79369_at	79369	LOC79369	B3GNT4	NA	NA	91_DN	NA	NA	NA	NA	NA	NA	NA	NA	NA	NA	NA NA
665_at	665	LOC665	BNIP3L	NA	NA	91_DN	NA	NA	NA	NA	NA	NA	NA	NA	NA	NA	NA NA
10370_at	10370	LOC10370	CITED2	NA	NA	91_DN	NA	NA	NA	NA	NA	NA	NA	NA	NA	NA	NA NA
1466_at	1466	LOC1466	CSRP2	NA	NA	91_DN	NA	NA	NA	NA	NA	NA	NA	NA	NA	NA	NA NA
7852_at	7852	LOC7852	CXCR4	Multiple	NA	91_DN	NA	NA	NA	NA	NA	NA	NA	NA	NA	NA	NA NA
1543_at	1543	LOC1543	CYP1A1	NA	NA	91_DN	NA	NA	NA	NA	NA	NA	NA	NA	NA	NA	NA NA
10570_at	10570	LOC10570	DPYSL4	NA	NA	91_DN	NA	NA	NA	NA	NA	NA	NA	NA	NA	NA	NA NA
1824_at	1824	LOC1824	DSC2	NA	NA	91_DN	NA	NA	NA	NA	NA	NA	NA	NA	NA	NA	NA NA
1944_at	1944	LOC1944	EFNA3	NA	NA	91_DN	NA	NA	NA	NA	NA	NA	NA	NA	NA	NA	NA NA
1956_at	1956	LOC1956	EGFR	NA	NA	91_DN	NA	NA	NA	NA	NA	NA	NA	NA	NA	NA	NA NA
54583_at	54583	LOC54583	EGLN1	Multiple	NA	91_DN	NA	NA	NA	NA	NA	NA	NA	NA	NA	NA	NA NA
30001_at	30001	LOC30001	ERO1L	Multiple	NA	91_DN	NA	NA	NA	NA	NA	NA	NA	NA	NA	NA	NA NA
10144_at	10144	LOC10144	FAM13A	NA	NA	91_DN	NA	NA	NA	NA	NA	NA	NA	NA	NA	NA	NA NA
26355_at	26355	LOC26355	FAM162A	NA	NA	91_DN	NA	NA	NA	NA	NA	NA	NA	NA	NA	NA	NA NA
2353_at	2353	LOC2353	FOS	NA	NA	91_DN	NA	NA	NA	NA	NA	NA	NA	NA	NA	NA	NA NA
2534_at	2534	LOC2534	FYN	Multiple	NA	91_DN	NA	NA	NA	NA	NA	NA	NA	NA	NA	NA	NA NA
2632_at	2632	LOC2632	GBE1	NA	NA	91_DN	NA	NA	NA	NA	NA	NA	NA	NA	NA	NA	NA NA
2697_at	2697	LOC2697	GJA1	NA	NA	91_DN	NA	NA	NA	NA	NA	NA	NA	NA	NA	NA	NA NA
2745_at	2745	LOC2745	GLRX	NA	NA	91_DN	NA	NA	NA	NA	NA	NA	NA	NA	NA	NA	NA NA
2997_at	2997	LOC2997	GYS1	NA	NA	91_DN	NA	NA	NA	NA	NA	NA	NA	NA	NA	NA	NA NA
54985_at	54985	LOC54985	HCFC1R1	NA	NA	91_DN	NA	NA	NA	NA	NA	NA	NA	NA	NA	NA	NA NA
3486_at	3486	LOC3486	IGFBP3	NA	NA	91_DN	NA	NA	NA	NA	NA	NA	NA	NA	NA	NA	NA NA
3488_at	3488	LOC3488	IGFBP5	NA	NA	91_DN	NA	NA	NA	NA	NA	NA	NA	NA	NA	NA	NA NA
10994_at	10994	LOC10994	ILVBL	NA	NA	91_DN	NA	NA	NA	NA	NA	NA	NA	NA	NA	NA	NA NA
23030_at	23030	LOC23030	KDM4B	Multiple	NA	91_DN	NA	NA	NA	NA	NA	NA	NA	NA	NA	NA	NA NA
3866_at	3866	LOC3866	KRT15	NA	NA	91_DN	NA	NA	NA	NA	NA	NA	NA	NA	NA	NA	NA NA
4016_at	4016	LOC4016	LOXL1	NA	NA	91_DN	NA	NA	NA	NA	NA	NA	NA	NA	NA	NA	NA NA
23764_at	23764	LOC23764	MAFF	Myeloid	NA	91_DN	NA	NA	NA	NA	NA	NA	NA	NA	NA	NA	NA NA
4601_at	4601	LOC4601	MXI1	NA	NA	91_DN	NA	NA	NA	NA	NA	NA	NA	NA	NA	NA	NA NA
8996_at	8996	LOC8996	NOL3	NA	NA	91_DN	NA	NA	NA	NA	NA	NA	NA	NA	NA	NA	NA NA
2908_at	2908	LOC2908	NR3C1	Multiple	NA	91_DN	NA	NA	NA	NA	NA	NA	NA	NA	NA	NA	NA NA
23363_at	23363	LOC23363	OBSL1	NA	NA	91_DN	NA	NA	NA	NA	NA	NA	NA	NA	NA	NA	NA NA
169611_at	169611	LOC169611	OLFML2A	NA	NA	91_DN	NA	NA	NA	NA	NA	NA	NA	NA	NA	NA	NA NA
5033_at	5033	LOC5033	P4HA1	NA	NA	91_DN	NA	NA	NA	NA	NA	NA	NA	NA	NA	NA	NA NA
8974_at	8974	LOC8974	P4HA2	NA	NA	91_DN	NA	NA	NA	NA	NA	NA	NA	NA	NA	NA	NA NA
5066_at	5066	LOC5066	PAM	NA	NA	91_DN	NA	NA	NA	NA	NA	NA	NA	NA	NA	NA	NA NA
5155_at	5155	LOC5155	PDGFB	NA	NA	91_DN	NA	NA	NA	NA	NA	NA	NA	NA	NA	NA	NA NA
5209_at	5209	LOC5209	PFKFB3	Monocyte	NA	91_DN	NA	NA	NA	NA	NA	NA	NA	NA	NA	NA	NA NA
80055_at	80055	LOC80055	PGAP1	NA	NA	91_DN	NA	NA	NA	NA	NA	NA	NA	NA	NA	NA	NA NA
5230_at	5230	LOC5230	PGK1	Multiple	NA	91_DN	NA	NA	NA	NA	NA	NA	NA	NA	NA	NA	NA NA
5236_at	5236	LOC5236	PGM1	NA	NA	91_DN	NA	NA	NA	NA	NA	NA	NA	NA	NA	NA	NA NA
284119_at	284119	LOC284119	PTRF	NA	NA	91_DN	NA	NA	NA	NA	NA	NA	NA	NA	NA	NA	NA NA
55278_at	55278	LOC55278	QRSL1	B Cell	NA	91_DN	NA	NA	NA	NA	NA	NA	NA	NA	NA	NA	NA NA
5768_at	5768	LOC5768	QSOX1	NA	NA	91_DN	NA	NA	NA	NA	NA	NA	NA	NA	NA	NA	NA NA
3516_at	3516	LOC3516	RBPJ	NA	NA	91_DN	NA	NA	NA	NA	NA	NA	NA	NA	NA	NA	NA NA
6038_at	6038	LOC6038	RNASE4	NA	NA	91_DN	NA	NA	NA	NA	NA	NA	NA	NA	NA	NA	NA NA
58528_at	58528	LOC58528	RRAGD	NA	NA	91_DN	NA	NA	NA	NA	NA	NA	NA	NA	NA	NA	NA NA
6275_at	6275	LOC6275	S100A4	NA	NA	91_DN	NA	NA	NA	NA	NA	NA	NA	NA	NA	NA	NA NA
6338_at	6338	LOC6338	SCNN1B	NA	NA	91_DN	NA	NA	NA	NA	NA	NA	NA	NA	NA	NA	NA NA
81855_at	81855	LOC81855	SFXN3	NA	NA	91_DN	NA	NA	NA	NA	NA	NA	NA	NA	NA	NA	NA NA
10603_at	10603	LOC10603	SH2B2	NA	NA	91_DN	NA	NA	NA	NA	NA	NA	NA	NA	NA	NA	NA NA
6457_at	6457	LOC6457	SH3GL3	Multiple	NA	91_DN	NA	NA	NA	NA	NA	NA	NA	NA	NA	NA	NA NA
6513_at	6513	LOC6513	SLC2A1	NA	NA	91_DN	NA	NA	NA	NA	NA	NA	NA	NA	NA	NA	NA NA
8406_at	8406	LOC8406	SRPX	NA	NA	91_DN	NA	NA	NA	NA	NA	NA	NA	NA	NA	NA	NA NA
6781_at	6781	LOC6781	STC1	NA	NA	91_DN	NA	NA	NA	NA	NA	NA	NA	NA	NA	NA	NA NA
11045_at	11045	LOC11045	UPK1A	NA	NA	91_DN	NA	NA	NA	NA	NA	NA	NA	NA	NA	NA	NA NA
7424_at	7424	LOC7424	VEGFC	NA	NA	91_DN	NA	NA	NA	NA	NA	NA	NA	NA	NA	NA	NA NA
7436_at	7436	LOC7436	VLDLR	NA	NA	91_DN	NA	NA	NA	NA	NA	NA	NA	NA	NA	NA	NA NA
8839_at	8839	LOC8839	WISP2	NA	NA	91_DN	NA	NA	NA	NA	NA	NA	NA	NA	NA	NA	NA NA
26118_at	26118	LOC26118	WSB1	NA	NA	91_DN	NA	NA	NA	NA	NA	NA	NA	NA	NA	NA	NA NA
55689_at	55689	LOC55689	YEATS2	NA	NA	91_DN	NA	NA	NA	NA	NA	NA	NA	NA	NA	NA	NA NA
23036_at	23036	LOC23036	ZNF292	NA	NA	91_DN	NA	NA	NA	NA	NA	NA	NA	NA	NA	NA	NA NA
55893_at	55893	LOC55893	ZNF395	NA	NA	91_DN	NA	NA	NA	NA	NA	NA	NA	NA	NA	NA	NA NA
5284_at	5284	LOC5284	PIGR	NA	NA	NA	ccrcc1.dn	NA	NA	NA	NA	NA	NA	NA	NA	NA	NA NA
256714_at	256714	LOC256714	MAP7D2	NA	NA	NA	ccrcc1.up	Up	NA	NA	NA	NA	NA	NA	NA	NA	NA NA
492307_at	492307	LOC492307	C8ORF22	NA	NA	NA	ccrcc1.up	NA	NA	NA	NA	NA	NA	NA	NA	NA	NA NA
2138_at	2138	LOC2138	EYA1	NA	NA	NA	ccrcc1.up	NA	NA	NA	NA	NA	NA	NA	NA	NA	NA NA
2903_at	2903	LOC2903	GRIN2A	NA	NA	NA	ccrcc1.up	NA	NA	NA	NA	NA	NA	NA	NA	NA	NA NA
4684_at	4684	LOC4684	NCAM1	NA	NA	NA	ccrcc1.up	NA	NA	NA	NA	NA	NA	NA	NA	NA	NA NA
22986_at	22986	LOC22986	SORCS3	NA	NA	NA	ccrcc1.up	NA	NA	NA	NA	NA	NA	NA	NA	NA	NA NA
6695_at	6695	LOC6695	SPOCK1	NA	NA	NA	ccrcc1.up	NA	NA	NA	NA	NA	NA	NA	NA	NA	NA NA
27347_at	27347	LOC27347	STK39	NA	NA	NA	ccrcc1.up	NA	NA	NA	NA	NA	NA	NA	NA	NA	NA NA
29974_at	29974	LOC29974	A1CF	NA	NA	NA	ccrcc2.dn	NA	NA	NA	NA	NA	NA	NA	NA	NA	NA NA
2243_at	2243	LOC2243	FGA	NA	NA	NA	ccrcc2.dn	NA	NA	NA	NA	NA	NA	NA	NA	NA	NA NA
5502_at	5502	LOC5502	PPP1R1A	NA	NA	NA	ccrcc2.dn	NA	NA	NA	NA	NA	NA	NA	NA	NA	NA NA
1573_at	1573	LOC1573	CYP2J2	NA	NA	NA	ccrcc2.up	NA	NA	NA	NA	NA	NA	NA	NA	NA	NA NA
115677_at	115677	LOC115677	NOSTRIN	NA	NA	NA	ccrcc2.up	NA	NA	NA	NA	NA	NA	NA	NA	NA	NA NA
10590_at	10590	LOC10590	SCGN	NA	NA	NA	ccrcc2.up	NA	NA	NA	NA	NA	NA	NA	NA	NA	NA NA
10050_at	10050	LOC10050	SLC17A4	NA	NA	NA	ccrcc2.up	NA	NA	NA	NA	NA	NA	NA	NA	NA	NA NA
6523_at	6523	LOC6523	SLC5A1	NA	NA	NA	ccrcc2.up	NA	NA	NA	NA	NA	NA	NA	NA	NA	NA NA
1356_at	1356	LOC1356	CP	NA	NA	NA	ccrcc3.dn	Up	NA	NA	NA	NA	NA	NA	NA	NA	NA NA
7422_at	7422	LOC7422	VEGFA	NA	NA	NA	ccrcc3.dn	NA	NA	McDermott_Angio	NA	NA	NA	NA	NA	NA	NA NA
5228_at	5228	LOC5228	PGF	NA	NA	NA	ccrcc3.dn	NA	NA	NA	NA	NA	NA	NA	NA	NA	NA NA
7039_at	7039	LOC7039	TGFA	Multiple	NA	NA	ccrcc3.dn	NA	NA	NA	NA	NA	NA	NA	NA	NA	NA NA
50617_at	50617	LOC50617	ATP6V0A4	NA	NA	NA	ccrcc3.up	Down	NA	NA	NA	NA	NA	NA	NA	NA	NA NA
1014_at	1014	LOC1014	CDH16	NA	NA	NA	ccrcc3.up	Down	NA	NA	NA	NA	NA	NA	NA	NA	NA NA
6422_at	6422	LOC6422	SFRP1	NA	NA	NA	ccrcc3.up	Down	NA	NA	NA	NA	NA	NA	NA	NA	NA NA
8416_at	8416	LOC8416	ANXA9	NA	NA	NA	ccrcc3.up	NA	NA	NA	NA	NA	NA	NA	NA	NA	NA NA
245972_at	245972	LOC245972	ATP6V0D2	NA	NA	NA	ccrcc3.up	NA	NA	NA	NA	NA	NA	NA	NA	NA	NA NA
57828_at	57828	LOC57828	CATSPERG	NA	NA	NA	ccrcc3.up	NA	NA	NA	NA	NA	NA	NA	NA	NA	NA NA
1015_at	1015	LOC1015	CDH17	NA	NA	NA	ccrcc3.up	NA	NA	NA	NA	NA	NA	NA	NA	NA	NA NA
1555_at	1555	LOC1555	CYP2B6	NA	NA	NA	ccrcc3.up	NA	NA	NA	NA	NA	NA	NA	NA	NA	NA NA
1733_at	1733	LOC1733	DIO1	NA	NA	NA	ccrcc3.up	NA	NA	NA	NA	NA	NA	NA	NA	NA	NA NA
2066_at	2066	LOC2066	ERBB4	NA	NA	NA	ccrcc3.up	NA	NA	NA	NA	NA	NA	NA	NA	NA	NA NA
3827_at	3827	LOC3827	KNG1	NA	NA	NA	ccrcc3.up	NA	NA	NA	NA	NA	NA	NA	NA	NA	NA NA
5208_at	5208	LOC5208	PFKFB2	NA	NA	NA	ccrcc3.up	NA	NA	NA	NA	NA	NA	NA	NA	NA	NA NA
5618_at	5618	LOC5618	PRLR	NA	NA	NA	ccrcc3.up	NA	NA	NA	NA	NA	NA	NA	NA	NA	NA NA
5816_at	5816	LOC5816	PVALB	NA	NA	NA	ccrcc3.up	NA	NA	NA	NA	NA	NA	NA	NA	NA	NA NA
9376_at	9376	LOC9376	SLC22A8	NA	NA	NA	ccrcc3.up	NA	NA	NA	NA	NA	NA	NA	NA	NA	NA NA
33_at	33	LOC33	ACADL	NA	NA	NA	ccrcc4.dn	NA	NA	NA	NA	NA	NA	NA	NA	NA	NA NA
8029_at	8029	LOC8029	CUBN	NA	NA	NA	ccrcc4.dn	NA	NA	NA	NA	NA	NA	NA	NA	NA	NA NA
10249_at	10249	LOC10249	GLYAT	NA	NA	NA	ccrcc4.dn	NA	NA	NA	NA	NA	NA	NA	NA	NA	NA NA
4036_at	4036	LOC4036	LRP2	NA	NA	NA	ccrcc4.dn	NA	NA	NA	NA	NA	NA	NA	NA	NA	NA NA
10786_at	10786	LOC10786	SLC17A3	NA	NA	NA	ccrcc4.dn	NA	NA	NA	NA	NA	NA	NA	NA	NA	NA NA
159963_at	159963	LOC159963	SLC5A12	NA	NA	NA	ccrcc4.dn	NA	NA	NA	NA	NA	NA	NA	NA	NA	NA NA
6540_at	6540	LOC6540	SLC6A13	NA	NA	NA	ccrcc4.dn	NA	NA	NA	NA	NA	NA	NA	NA	NA	NA NA
27233_at	27233	LOC27233	SULT1C4	NA	NA	NA	ccrcc4.dn	NA	NA	NA	NA	NA	NA	NA	NA	NA	NA NA
27299_at	27299	LOC27299	ADAMDEC1	NA	NA	NA	ccrcc4.up	Up	NA	NA	NA	NA	NA	NA	NA	NA	NA NA
9447_at	9447	LOC9447	AIM2	Lymphoid	NA	NA	ccrcc4.up	NA	NA	NA	NA	NA	CM009_up	NA	NA	NA	NA NA
712_at	712	LOC712	C1QA	NA	NA	NA	ccrcc4.up	NA	NA	NA	NA	NA	NA	NA	NA	NA	NA NA
10563_at	10563	LOC10563	CXCL13	NA	NA	NA	ccrcc4.up	NA	NA	NA	NA	NA	NA	NA	NA	NA	NA NA
3512_at	3512	LOC3512	IGJ	NA	NA	NA	ccrcc4.up	NA	NA	NA	NA	NA	NA	NA	NA	NA	NA NA
3880_at	3880	LOC3880	KRT19	NA	NA	NA	ccrcc4.up	NA	NA	NA	NA	NA	NA	NA	NA	NA	NA NA
11040_at	11040	LOC11040	PIM2	Lymphoid	NA	NA	ccrcc4.up	NA	NA	NA	NA	NA	NA	NA	NA	NA	NA NA
5328_at	5328	LOC5328	PLAU	NA	NA	NA	ccrcc4.up	NA	NA	NA	NA	NA	NA	NA	NA	NA	NA NA
6423_at	6423	LOC6423	SFRP2	NA	NA	NA	ccrcc4.up	NA	NA	NA	NA	NA	NA	NA	NA	NA	NA NA
6590_at	6590	LOC6590	SLPI	NA	NA	NA	ccrcc4.up	NA	NA	NA	NA	NA	NA	NA	NA	NA	NA NA
3514_at	3514	LOC3514	IGKC	B Cell	NA	NA	ccrcc4.up	NA	NA	NA	NA	NA	NA	NA	NA	NA	NA NA
3728_at	3728	LOC3728	JUP	NA	NA	NA	NA	Down	DOWN	NA	NA	NA	NA	NA	NA	NA	NA NA
23321_at	23321	LOC23321	TRIM2	NA	NA	NA	NA	Down	DOWN	NA	NA	NA	NA	NA	NA	NA	NA NA
92949_at	92949	LOC92949	ADAMTSL1	NA	NA	NA	NA	Down	NA	NA	NA	NA	NA	NA	NA	NA	NA NA
84803_at	84803	LOC84803	AGPAT9	NA	NA	NA	NA	Down	NA	NA	NA	NA	NA	NA	NA	NA	NA NA
4329_at	4329	LOC4329	ALDH6A1	NA	NA	NA	NA	Down	NA	NA	NA	NA	NA	NA	NA	NA	NA NA
284_at	284	LOC284	ANGPT1	NA	NA	NA	NA	Down	NA	NA	NA	NA	NA	NA	NA	NA	NA NA
26033_at	26033	LOC26033	ATRNL1	NA	NA	NA	NA	Down	NA	NA	NA	NA	NA	NA	NA	NA	NA NA
55450_at	55450	LOC55450	CAMK2N1	NA	NA	NA	NA	Down	NA	NA	NA	NA	NA	NA	NA	NA	NA NA
54897_at	54897	LOC54897	CASZ1	NA	NA	NA	NA	Down	NA	NA	NA	NA	NA	NA	NA	NA	NA NA
999_at	999	LOC999	CDH1	NA	NA	NA	NA	Down	NA	NA	NA	NA	NA	NA	NA	NA	NA NA
10752_at	10752	LOC10752	CHL1	NA	NA	NA	NA	Down	NA	NA	NA	NA	NA	NA	NA	NA	NA NA
80303_at	80303	LOC80303	EFHD1	NA	NA	NA	NA	Down	NA	NA	NA	NA	NA	NA	NA	NA	NA NA
4072_at	4072	LOC4072	EPCAM	NA	NA	NA	NA	Down	NA	NA	NA	NA	NA	NA	NA	NA	NA NA
221061_at	221061	LOC221061	FAM171A1	NA	NA	NA	NA	Down	NA	NA	NA	NA	NA	NA	NA	NA	NA NA
222584_at	222584	LOC222584	FAM83B	NA	NA	NA	NA	Down	NA	NA	NA	NA	NA	NA	NA	NA	NA NA
158326_at	158326	LOC158326	FREM1	NA	NA	NA	NA	Down	NA	NA	NA	NA	NA	NA	NA	NA	NA NA
51301_at	51301	LOC51301	GCNT4	NA	NA	NA	NA	Down	NA	NA	NA	NA	NA	NA	NA	NA	NA NA
51454_at	51454	LOC51454	GULP1	NA	NA	NA	NA	Down	NA	NA	NA	NA	NA	NA	NA	NA	NA NA
120071_at	120071	LOC120071	GYLTL1B	NA	NA	NA	NA	Down	NA	NA	NA	NA	NA	NA	NA	NA	NA NA
3291_at	3291	LOC3291	HSD11B2	NA	NA	NA	NA	Down	NA	NA	NA	NA	NA	NA	NA	NA	NA NA
3949_at	3949	LOC3949	LDLR	NA	NA	NA	NA	Down	NA	NA	NA	NA	NA	NA	NA	NA	NA NA
744_at	744	LOC744	MPPED2	NA	NA	NA	NA	Down	NA	NA	NA	NA	NA	NA	NA	NA	NA NA
135138_at	135138	LOC135138	PACRG	NA	NA	NA	NA	Down	NA	NA	NA	NA	NA	NA	NA	NA	NA NA
5071_at	5071	LOC5071	PARK2	NA	NA	NA	NA	Down	NA	NA	NA	NA	NA	NA	NA	NA	NA NA
27115_at	27115	LOC27115	PDE7B	NA	NA	NA	NA	Down	NA	NA	NA	NA	NA	NA	NA	NA	NA NA
26227_at	26227	LOC26227	PHGDH	NA	NA	NA	NA	Down	NA	NA	NA	NA	NA	NA	NA	NA	NA NA
5334_at	5334	LOC5334	PLCL1	NA	NA	NA	NA	Down	NA	NA	NA	NA	NA	NA	NA	NA	NA NA
10891_at	10891	LOC10891	PPARGC1A	NA	NA	NA	NA	Down	NA	NA	NA	NA	NA	NA	NA	NA	NA NA
5909_at	5909	LOC5909	RAP1GAP	NA	NA	NA	NA	Down	NA	NA	NA	NA	NA	NA	NA	NA	NA NA
51655_at	51655	LOC51655	RASD1	NA	NA	NA	NA	Down	NA	NA	NA	NA	NA	NA	NA	NA	NA NA
27330_at	27330	LOC27330	RPS6KA6	NA	NA	NA	NA	Down	NA	NA	NA	NA	NA	NA	NA	NA	NA NA
85477_at	85477	LOC85477	SCIN	NA	NA	NA	NA	Down	NA	NA	NA	NA	NA	NA	NA	NA	NA NA
57619_at	57619	LOC57619	SHROOM3	NA	NA	NA	NA	Down	NA	NA	NA	NA	NA	NA	NA	NA	NA NA
6492_at	6492	LOC6492	SIM1	NA	NA	NA	NA	Down	NA	NA	NA	NA	NA	NA	NA	NA	NA NA
6557_at	6557	LOC6557	SLC12A1	NA	NA	NA	NA	Down	NA	NA	NA	NA	NA	NA	NA	NA	NA NA
25928_at	25928	LOC25928	SOSTDC1	NA	NA	NA	NA	Down	NA	NA	NA	NA	NA	NA	NA	NA	NA NA
9882_at	9882	LOC9882	TBC1D4	NA	NA	NA	NA	Down	NA	NA	NA	NA	NA	NA	NA	NA	NA NA
221981_at	221981	LOC221981	THSD7A	NA	NA	NA	NA	Down	NA	NA	NA	NA	NA	NA	NA	NA	NA NA
27324_at	27324	LOC27324	TOX3	NA	NA	NA	NA	Down	NA	NA	NA	NA	NA	NA	NA	NA	NA NA
7102_at	7102	LOC7102	TSPAN7	NA	NA	NA	NA	Down	NA	NA	NA	NA	NA	NA	NA	NA	NA NA
158219_at	158219	LOC158219	TTC39B	NA	NA	NA	NA	Down	NA	NA	NA	NA	NA	NA	NA	NA	NA NA
7364_at	7364	LOC7364	UGT2B7	NA	NA	NA	NA	Down	NA	NA	NA	NA	NA	NA	NA	NA	NA NA
7369_at	7369	LOC7369	UMOD	NA	NA	NA	NA	Down	NA	NA	NA	NA	NA	NA	NA	NA	NA NA
256764_at	256764	LOC256764	WDR72	NA	NA	NA	NA	Down	NA	NA	NA	NA	NA	NA	NA	NA	NA NA
79971_at	79971	LOC79971	WLS	NA	NA	NA	NA	Down	NA	NA	NA	NA	NA	NA	NA	NA	NA NA
100128252_at	100128252	LOC100128252	ZNF667-AS1	NA	NA	NA	NA	Down	NA	NA	NA	NA	NA	NA	NA	NA	NA NA
5329_at	5329	LOC5329	PLAUR	Monocyte	NA	NA	NA	Up	UP	NA	NA	NA	NA	NA	NA	NA	NA NA
2919_at	2919	LOC2919	CXCL1	Monocyte	NA	NA	NA	Up	NA	McDermott_Myeloid	NA	NA	NA	Short_Nano	NA	NA	NA NA
6556_at	6556	LOC6556	SLC11A1	Myeloid	NA	NA	NA	Up	NA	NA	NA	NA	NA	Nano	NA	NA	NA NA
19_at	19	LOC19	ABCA1	NA	NA	NA	NA	Up	NA	NA	NA	NA	NA	NA	NA	NA	NA NA
240_at	240	LOC240	ALOX5	Multiple	NA	NA	NA	Up	NA	NA	NA	NA	NA	NA	NA	NA	NA NA
54518_at	54518	LOC54518	APBB1IP	Multiple	NA	NA	NA	Up	NA	NA	NA	NA	NA	NA	NA	NA	NA NA
366_at	366	LOC366	AQP9	NA	NA	NA	NA	Up	NA	NA	NA	NA	NA	NA	NA	NA	NA NA
597_at	597	LOC597	BCL2A1	Myeloid	NA	NA	NA	Up	NA	NA	NA	NA	NA	NA	NA	NA	NA NA
7439_at	7439	LOC7439	BEST1	NA	NA	NA	NA	Up	NA	NA	NA	NA	NA	NA	NA	NA	NA NA
330_at	330	LOC330	BIRC3	Multiple	NA	NA	NA	Up	NA	NA	NA	NA	NA	NA	NA	NA	NA NA
404550_at	404550	LOC404550	C16ORF74	NA	NA	NA	NA	Up	NA	NA	NA	NA	NA	NA	NA	NA	NA NA
51279_at	51279	LOC51279	C1RL	NA	NA	NA	NA	Up	NA	NA	NA	NA	NA	NA	NA	NA	NA NA
717_at	717	LOC717	C2	NA	NA	NA	NA	Up	NA	NA	NA	NA	NA	NA	NA	NA	NA NA
718_at	718	LOC718	C3	NA	NA	NA	NA	Up	NA	NA	NA	NA	NA	NA	NA	NA	NA NA
389336_at	389336	LOC389336	C5ORF46	NA	NA	NA	NA	Up	NA	NA	NA	NA	NA	NA	NA	NA	NA NA
6364_at	6364	LOC6364	CCL20	Multiple	NA	NA	NA	Up	NA	NA	NA	NA	NA	NA	NA	NA	NA NA
50937_at	50937	LOC50937	CDON	NA	NA	NA	NA	Up	NA	NA	NA	NA	NA	NA	NA	NA	NA NA
51363_at	51363	LOC51363	CHST15	Multiple	NA	NA	NA	Up	NA	NA	NA	NA	NA	NA	NA	NA	NA NA
1441_at	1441	LOC1441	CSF3R	Myeloid	NA	NA	NA	Up	NA	NA	NA	NA	NA	NA	NA	NA	NA NA
8701_at	8701	LOC8701	DNAH11	NA	NA	NA	NA	Up	NA	NA	NA	NA	NA	NA	NA	NA	NA NA
1978_at	1978	LOC1978	EIF4EBP1	NA	NA	NA	NA	Up	NA	NA	NA	NA	NA	NA	NA	NA	NA NA
22936_at	22936	LOC22936	ELL2	B Cell	NA	NA	NA	Up	NA	NA	NA	NA	NA	NA	NA	NA	NA NA
2172_at	2172	LOC2172	FABP6	NA	NA	NA	NA	Up	NA	NA	NA	NA	NA	NA	NA	NA	NA NA
2207_at	2207	LOC2207	FCER1G	NA	NA	NA	NA	Up	NA	NA	NA	NA	NA	NA	NA	NA	NA NA
2213_at	2213	LOC2213	FCGR2B	Neutrophil	NA	NA	NA	Up	NA	NA	NA	NA	NA	NA	NA	NA	NA NA
2214_at	2214	LOC2214	FCGR3A	NA	NA	NA	NA	Up	NA	NA	NA	NA	NA	NA	NA	NA	NA NA
391059_at	391059	LOC391059	FRRS1	NA	NA	NA	NA	Up	NA	NA	NA	NA	NA	NA	NA	NA	NA NA
283431_at	283431	LOC283431	GAS2L3	Myeloid	NA	NA	NA	Up	NA	NA	NA	NA	NA	NA	NA	NA	NA NA
650669_at	650669	LOC650669	GAS6-AS1	NA	NA	NA	NA	Up	NA	NA	NA	NA	NA	NA	NA	NA	NA NA
493869_at	493869	LOC493869	GPX8	NA	NA	NA	NA	Up	NA	NA	NA	NA	NA	NA	NA	NA	NA NA
253430_at	253430	LOC253430	IPMK	NA	NA	NA	NA	Up	NA	NA	NA	NA	NA	NA	NA	NA	NA NA
3796_at	3796	LOC3796	KIF2A	Multiple	NA	NA	NA	Up	NA	NA	NA	NA	NA	NA	NA	NA	NA NA
10184_at	10184	LOC10184	LHFPL2	NA	NA	NA	NA	Up	NA	NA	NA	NA	NA	NA	NA	NA	NA NA
11006_at	11006	LOC11006	LILRB4	NA	NA	NA	NA	Up	NA	NA	NA	NA	NA	NA	NA	NA	NA NA
79888_at	79888	LOC79888	LPCAT1	NA	NA	NA	NA	Up	NA	NA	NA	NA	NA	NA	NA	NA	NA NA
9242_at	9242	LOC9242	MSC	Myeloid	NA	NA	NA	Up	NA	NA	NA	NA	NA	NA	NA	NA	NA NA
4688_at	4688	LOC4688	NCF2	Myeloid	NA	NA	NA	Up	NA	NA	NA	NA	NA	NA	NA	NA	NA NA
4885_at	4885	LOC4885	NPTX2	NA	NA	NA	NA	Up	NA	NA	NA	NA	NA	NA	NA	NA	NA NA
5034_at	5034	LOC5034	P4HB	NA	NA	NA	NA	Up	NA	NA	NA	NA	NA	NA	NA	NA	NA NA
55824_at	55824	LOC55824	PAG1	NA	NA	NA	NA	Up	NA	NA	NA	NA	NA	NA	NA	NA	NA NA
10954_at	10954	LOC10954	PDIA5	NA	NA	NA	NA	Up	NA	NA	NA	NA	NA	NA	NA	NA	NA NA
5210_at	5210	LOC5210	PFKFB4	NA	NA	NA	NA	Up	NA	NA	NA	NA	NA	NA	NA	NA	NA NA
5352_at	5352	LOC5352	PLOD2	NA	NA	NA	NA	Up	NA	NA	NA	NA	NA	NA	NA	NA	NA NA
5361_at	5361	LOC5361	PLXNA1	NA	NA	NA	NA	Up	NA	NA	NA	NA	NA	NA	NA	NA	NA NA
5507_at	5507	LOC5507	PPP1R3C	NA	NA	NA	NA	Up	NA	NA	NA	NA	NA	NA	NA	NA	NA NA
23231_at	23231	LOC23231	SEL1L3	NA	NA	NA	NA	Up	NA	NA	NA	NA	NA	NA	NA	NA	NA NA
54437_at	54437	LOC54437	SEMA5B	NA	NA	NA	NA	Up	NA	NA	NA	NA	NA	NA	NA	NA	NA NA
56833_at	56833	LOC56833	SLAMF8	Myeloid	NA	NA	NA	Up	NA	NA	NA	NA	NA	NA	NA	NA	NA NA
6566_at	6566	LOC6566	SLC16A1	NA	NA	NA	NA	Up	NA	NA	NA	NA	NA	NA	NA	NA	NA NA
9120_at	9120	LOC9120	SLC16A6	Multiple	NA	NA	NA	Up	NA	NA	NA	NA	NA	NA	NA	NA	NA NA
23516_at	23516	LOC23516	SLC39A14	NA	NA	NA	NA	Up	NA	NA	NA	NA	NA	NA	NA	NA	NA NA
285195_at	285195	LOC285195	SLC9A9	NA	NA	NA	NA	Up	NA	NA	NA	NA	NA	NA	NA	NA	NA NA
257364_at	257364	LOC257364	SNX33	NA	NA	NA	NA	Up	NA	NA	NA	NA	NA	NA	NA	NA	NA NA
7097_at	7097	LOC7097	TLR2	Myeloid	NA	NA	NA	Up	NA	NA	NA	NA	NA	NA	NA	NA	NA NA
22974_at	22974	LOC22974	TPX2	T Cell	NA	NA	NA	Up	NA	NA	NA	NA	NA	NA	NA	NA	NA NA
10537_at	10537	LOC10537	UBD	Dendritic Cell	NA	NA	NA	Up	NA	NA	NA	NA	NA	NA	NA	NA	NA NA
8875_at	8875	LOC8875	VNN2	Neutrophil	NA	NA	NA	Up	NA	NA	NA	NA	NA	NA	NA	NA	NA NA
11326_at	11326	LOC11326	VSIG4	NA	NA	NA	NA	Up	NA	NA	NA	NA	NA	NA	NA	NA	NA NA
220001_at	220001	LOC220001	VWCE	NA	NA	NA	NA	Up	NA	NA	NA	NA	NA	NA	NA	NA	NA NA
84293_at	84293	LOC84293	FAM213A	NA	NA	NA	NA	NA	DOWN	NA	NA	NA	CM009_down	NA	NA	NA	NA NA
79623_at	79623	LOC79623	GALNT14	NA	NA	NA	NA	NA	DOWN	NA	NA	NA	CM009_down	NA	NA	NA	NA NA
26035_at	26035	LOC26035	GLCE	NA	NA	NA	NA	NA	DOWN	NA	NA	NA	CM009_down	NA	NA	NA	NA NA
120_at	120	LOC120	ADD3	NA	NA	NA	NA	NA	DOWN	NA	NA	NA	NA	NA	NA	NA	NA NA
54812_at	54812	LOC54812	AFTPH	NA	NA	NA	NA	NA	DOWN	NA	NA	NA	NA	NA	NA	NA	NA NA
10768_at	10768	LOC10768	AHCYL1	NA	NA	NA	NA	NA	DOWN	NA	NA	NA	NA	NA	NA	NA	NA NA
51390_at	51390	LOC51390	AIG1	NA	NA	NA	NA	NA	DOWN	NA	NA	NA	NA	NA	NA	NA	NA NA
8644_at	8644	LOC8644	AKR1C3	NA	NA	NA	NA	NA	DOWN	NA	NA	NA	NA	NA	NA	NA	NA NA
338699_at	338699	LOC338699	ANKRD42	NA	NA	NA	NA	NA	DOWN	NA	NA	NA	NA	NA	NA	NA	NA NA
83478_at	83478	LOC83478	ARHGAP24	NA	NA	NA	NA	NA	DOWN	NA	NA	NA	NA	NA	NA	NA	NA NA
8853_at	8853	LOC8853	ASAP2	NA	NA	NA	NA	NA	DOWN	NA	NA	NA	NA	NA	NA	NA	NA NA
51008_at	51008	LOC51008	ASCC1	NA	NA	NA	NA	NA	DOWN	NA	NA	NA	NA	NA	NA	NA	NA NA
11101_at	11101	LOC11101	ATE1	NA	NA	NA	NA	NA	DOWN	NA	NA	NA	NA	NA	NA	NA	NA NA
515_at	515	LOC515	ATP5F1	NA	NA	NA	NA	NA	DOWN	NA	NA	NA	NA	NA	NA	NA	NA NA
284018_at	284018	LOC284018	C17ORF58	Dendritic Cell	NA	NA	NA	NA	DOWN	NA	NA	NA	NA	NA	NA	NA	NA NA
4179_at	4179	LOC4179	CD46	NA	NA	NA	NA	NA	DOWN	NA	NA	NA	NA	NA	NA	NA	NA NA
51397_at	51397	LOC51397	COMMD10	NA	NA	NA	NA	NA	DOWN	NA	NA	NA	NA	NA	NA	NA	NA NA
1368_at	1368	LOC1368	CPM	NA	NA	NA	NA	NA	DOWN	NA	NA	NA	NA	NA	NA	NA	NA NA
1429_at	1429	LOC1429	CRYZ	NA	NA	NA	NA	NA	DOWN	NA	NA	NA	NA	NA	NA	NA	NA NA
57834_at	57834	LOC57834	CYP4F11	NA	NA	NA	NA	NA	DOWN	NA	NA	NA	NA	NA	NA	NA	NA NA
80344_at	80344	LOC80344	DCAF11	NA	NA	NA	NA	NA	DOWN	NA	NA	NA	NA	NA	NA	NA	NA NA
51071_at	51071	LOC51071	DERA	NA	NA	NA	NA	NA	DOWN	NA	NA	NA	NA	NA	NA	NA	NA NA
27122_at	27122	LOC27122	DKK3	NA	NA	NA	NA	NA	DOWN	NA	NA	NA	NA	NA	NA	NA	NA NA
1803_at	1803	LOC1803	DPP4	NA	NA	NA	NA	NA	DOWN	NA	NA	NA	NA	NA	NA	NA	NA NA
10455_at	10455	LOC10455	ECI2	NA	NA	NA	NA	NA	DOWN	NA	NA	NA	NA	NA	NA	NA	NA NA
84288_at	84288	LOC84288	EFCAB2	NA	NA	NA	NA	NA	DOWN	NA	NA	NA	NA	NA	NA	NA	NA NA
51234_at	51234	LOC51234	EMC4	NA	NA	NA	NA	NA	DOWN	NA	NA	NA	NA	NA	NA	NA	NA NA
56851_at	56851	LOC56851	EMC7	NA	NA	NA	NA	NA	DOWN	NA	NA	NA	NA	NA	NA	NA	NA NA
59084_at	59084	LOC59084	ENPP5	NA	NA	NA	NA	NA	DOWN	NA	NA	NA	NA	NA	NA	NA	NA NA
2035_at	2035	LOC2035	EPB41	NA	NA	NA	NA	NA	DOWN	NA	NA	NA	NA	NA	NA	NA	NA NA
54749_at	54749	LOC54749	EPDR1	NA	NA	NA	NA	NA	DOWN	NA	NA	NA	NA	NA	NA	NA	NA NA
2150_at	2150	LOC2150	F2RL1	NA	NA	NA	NA	NA	DOWN	NA	NA	NA	NA	NA	NA	NA	NA NA
79843_at	79843	LOC79843	FAM124B	NA	NA	NA	NA	NA	DOWN	NA	NA	NA	NA	NA	NA	NA	NA NA
26240_at	26240	LOC26240	FAM50B	NA	NA	NA	NA	NA	DOWN	NA	NA	NA	NA	NA	NA	NA	NA NA
89885_at	89885	LOC89885	FATE1	NA	NA	NA	NA	NA	DOWN	NA	NA	NA	NA	NA	NA	NA	NA NA
2329_at	2329	LOC2329	FMO4	NA	NA	NA	NA	NA	DOWN	NA	NA	NA	NA	NA	NA	NA	NA NA
1647_at	1647	LOC1647	GADD45A	NA	NA	NA	NA	NA	DOWN	NA	NA	NA	NA	NA	NA	NA	NA NA
9527_at	9527	LOC9527	GOSR1	NA	NA	NA	NA	NA	DOWN	NA	NA	NA	NA	NA	NA	NA	NA NA
54103_at	54103	LOC54103	GSAP	NA	NA	NA	NA	NA	DOWN	NA	NA	NA	NA	NA	NA	NA	NA NA
3032_at	3032	LOC3032	HADHB	NA	NA	NA	NA	NA	DOWN	NA	NA	NA	NA	NA	NA	NA	NA NA
3212_at	3212	LOC3212	HOXB2	NA	NA	NA	NA	NA	DOWN	NA	NA	NA	NA	NA	NA	NA	NA NA
81533_at	81533	LOC81533	ITFG1	NA	NA	NA	NA	NA	DOWN	NA	NA	NA	NA	NA	NA	NA	NA NA
9445_at	9445	LOC9445	ITM2B	NA	NA	NA	NA	NA	DOWN	NA	NA	NA	NA	NA	NA	NA	NA NA
3716_at	3716	LOC3716	JAK1	Multiple	NA	NA	NA	NA	DOWN	NA	NA	NA	NA	NA	NA	NA	NA NA
339123_at	339123	LOC339123	JMJD8	NA	NA	NA	NA	NA	DOWN	NA	NA	NA	NA	NA	NA	NA	NA NA
3773_at	3773	LOC3773	KCNJ16	NA	NA	NA	NA	NA	DOWN	NA	NA	NA	NA	NA	NA	NA	NA NA
8462_at	8462	LOC8462	KLF11	NA	NA	NA	NA	NA	DOWN	NA	NA	NA	NA	NA	NA	NA	NA NA
23588_at	23588	LOC23588	KLHDC2	NA	NA	NA	NA	NA	DOWN	NA	NA	NA	NA	NA	NA	NA	NA NA
10542_at	10542	LOC10542	LAMTOR5	NA	NA	NA	NA	NA	DOWN	NA	NA	NA	NA	NA	NA	NA	NA NA
55788_at	55788	LOC55788	LMBRD1	NA	NA	NA	NA	NA	DOWN	NA	NA	NA	NA	NA	NA	NA	NA NA
10162_at	10162	LOC10162	LPCAT3	NA	NA	NA	NA	NA	DOWN	NA	NA	NA	NA	NA	NA	NA	NA NA
116068_at	116068	LOC116068	LYSMD3	NA	NA	NA	NA	NA	DOWN	NA	NA	NA	NA	NA	NA	NA	NA NA
4118_at	4118	LOC4118	MAL	NA	NA	NA	NA	NA	DOWN	NA	NA	NA	NA	NA	NA	NA	NA NA
9053_at	9053	LOC9053	MAP7	NA	NA	NA	NA	NA	DOWN	NA	NA	NA	NA	NA	NA	NA	NA NA
10150_at	10150	LOC10150	MBNL2	NA	NA	NA	NA	NA	DOWN	NA	NA	NA	NA	NA	NA	NA	NA NA
64087_at	64087	LOC64087	MCCC2	NA	NA	NA	NA	NA	DOWN	NA	NA	NA	NA	NA	NA	NA	NA NA
25840_at	25840	LOC25840	METTL7A	NA	NA	NA	NA	NA	DOWN	NA	NA	NA	NA	NA	NA	NA	NA NA
4258_at	4258	LOC4258	MGST2	NA	NA	NA	NA	NA	DOWN	NA	NA	NA	NA	NA	NA	NA	NA NA
25874_at	25874	LOC25874	MPC2	NA	NA	NA	NA	NA	DOWN	NA	NA	NA	NA	NA	NA	NA	NA NA
29074_at	29074	LOC29074	MRPL18	NA	NA	NA	NA	NA	DOWN	NA	NA	NA	NA	NA	NA	NA	NA NA
63908_at	63908	LOC63908	NAPB	NA	NA	NA	NA	NA	DOWN	NA	NA	NA	NA	NA	NA	NA	NA NA
27020_at	27020	LOC27020	NPTN	NA	NA	NA	NA	NA	DOWN	NA	NA	NA	NA	NA	NA	NA	NA NA
1728_at	1728	LOC1728	NQO1	NA	NA	NA	NA	NA	DOWN	NA	NA	NA	NA	NA	NA	NA	NA NA
221294_at	221294	LOC221294	NT5DC1	NA	NA	NA	NA	NA	DOWN	NA	NA	NA	NA	NA	NA	NA	NA NA
5007_at	5007	LOC5007	OSBP	NA	NA	NA	NA	NA	DOWN	NA	NA	NA	NA	NA	NA	NA	NA NA
11252_at	11252	LOC11252	PACSIN2	NA	NA	NA	NA	NA	DOWN	NA	NA	NA	NA	NA	NA	NA	NA NA
23042_at	NA	NA	PDXDC1 || ?	NA	NA	NA	NA	NA	DOWN	NA	NA	NA	NA	NA	NA	NA	NA NA
55825_at	55825	LOC55825	PECR	NA	NA	NA	NA	NA	DOWN	NA	NA	NA	NA	NA	NA	NA	NA NA
5627_at	5627	LOC5627	PROS1	NA	NA	NA	NA	NA	DOWN	NA	NA	NA	NA	NA	NA	NA	NA NA
158471_at	158471	LOC158471	PRUNE2	NA	NA	NA	NA	NA	DOWN	NA	NA	NA	NA	NA	NA	NA	NA NA
22949_at	22949	LOC22949	PTGR1	NA	NA	NA	NA	NA	DOWN	NA	NA	NA	NA	NA	NA	NA	NA NA
9609_at	9609	LOC9609	RAB36	NA	NA	NA	NA	NA	DOWN	NA	NA	NA	NA	NA	NA	NA	NA NA
64080_at	64080	LOC64080	RBKS	NA	NA	NA	NA	NA	DOWN	NA	NA	NA	NA	NA	NA	NA	NA NA
54502_at	54502	LOC54502	RBM47	Monocyte	NA	NA	NA	NA	DOWN	NA	NA	NA	NA	NA	NA	NA	NA NA
473_at	473	LOC473	RERE	NA	NA	NA	NA	NA	DOWN	NA	NA	NA	NA	NA	NA	NA	NA NA
55328_at	55328	LOC55328	RNLS	NA	NA	NA	NA	NA	DOWN	NA	NA	NA	NA	NA	NA	NA	NA NA
283345_at	283345	LOC283345	RPL13P5	NA	NA	NA	NA	NA	DOWN	NA	NA	NA	NA	NA	NA	NA	NA NA
51128_at	51128	LOC51128	SAR1B	NA	NA	NA	NA	NA	DOWN	NA	NA	NA	NA	NA	NA	NA	NA NA
8436_at	8436	LOC8436	SDPR	NA	NA	NA	NA	NA	DOWN	NA	NA	NA	NA	NA	NA	NA	NA NA
5274_at	5274	LOC5274	SERPINI1	NA	NA	NA	NA	NA	DOWN	NA	NA	NA	NA	NA	NA	NA	NA NA
27244_at	27244	LOC27244	SESN1	NA	NA	NA	NA	NA	DOWN	NA	NA	NA	NA	NA	NA	NA	NA NA
133383_at	133383	LOC133383	SETD9	NA	NA	NA	NA	NA	DOWN	NA	NA	NA	NA	NA	NA	NA	NA NA
6470_at	6470	LOC6470	SHMT1	NA	NA	NA	NA	NA	DOWN	NA	NA	NA	NA	NA	NA	NA	NA NA
6584_at	6584	LOC6584	SLC22A5	NA	NA	NA	NA	NA	DOWN	NA	NA	NA	NA	NA	NA	NA	NA NA
9963_at	9963	LOC9963	SLC23A1	NA	NA	NA	NA	NA	DOWN	NA	NA	NA	NA	NA	NA	NA	NA NA
56606_at	56606	LOC56606	SLC2A9	NA	NA	NA	NA	NA	DOWN	NA	NA	NA	NA	NA	NA	NA	NA NA
80255_at	80255	LOC80255	SLC35F5	NA	NA	NA	NA	NA	DOWN	NA	NA	NA	NA	NA	NA	NA	NA NA
2542_at	2542	LOC2542	SLC37A4	NA	NA	NA	NA	NA	DOWN	NA	NA	NA	NA	NA	NA	NA	NA NA
28232_at	28232	LOC28232	SLCO3A1	Multiple	NA	NA	NA	NA	DOWN	NA	NA	NA	NA	NA	NA	NA	NA NA
80176_at	80176	LOC80176	SPSB1	NA	NA	NA	NA	NA	DOWN	NA	NA	NA	NA	NA	NA	NA	NA NA
6821_at	6821	LOC6821	SUOX	NA	NA	NA	NA	NA	DOWN	NA	NA	NA	NA	NA	NA	NA	NA NA
6856_at	6856	LOC6856	SYPL1	NA	NA	NA	NA	NA	DOWN	NA	NA	NA	NA	NA	NA	NA	NA NA
26608_at	26608	LOC26608	TBL2	NA	NA	NA	NA	NA	DOWN	NA	NA	NA	NA	NA	NA	NA	NA NA
54664_at	54664	LOC54664	TMEM106B	NA	NA	NA	NA	NA	DOWN	NA	NA	NA	NA	NA	NA	NA	NA NA
135932_at	135932	LOC135932	TMEM139	NA	NA	NA	NA	NA	DOWN	NA	NA	NA	NA	NA	NA	NA	NA NA
51522_at	51522	LOC51522	TMEM14C	NA	NA	NA	NA	NA	DOWN	NA	NA	NA	NA	NA	NA	NA	NA NA
55504_at	55504	LOC55504	TNFRSF19	NA	NA	NA	NA	NA	DOWN	NA	NA	NA	NA	NA	NA	NA	NA NA
7265_at	7265	LOC7265	TTC1	NA	NA	NA	NA	NA	DOWN	NA	NA	NA	NA	NA	NA	NA	NA NA
7322_at	7322	LOC7322	UBE2D2	NA	NA	NA	NA	NA	DOWN	NA	NA	NA	NA	NA	NA	NA	NA NA
27089_at	27089	LOC27089	UQCRQ	NA	NA	NA	NA	NA	DOWN	NA	NA	NA	NA	NA	NA	NA	NA NA
29_at	29	LOC29	ABR	NA	NA	NA	NA	NA	UP	NA	NA	NA	NA	NA	NA	NA	NA NA
197322_at	197322	LOC197322	ACSF3	NA	NA	NA	NA	NA	UP	NA	NA	NA	NA	NA	NA	NA	NA NA
338692_at	338692	LOC338692	ANKRD13D	NA	NA	NA	NA	NA	UP	NA	NA	NA	NA	NA	NA	NA	NA NA
84502_at	NA	NA	AP1G2 || JPH4	NA	NA	NA	NA	NA	UP	NA	NA	NA	NA	NA	NA	NA	NA NA
41_at	41	LOC41	ASIC1	NA	NA	NA	NA	NA	UP	NA	NA	NA	NA	NA	NA	NA	NA NA
79915_at	79915	LOC79915	ATAD5	NA	NA	NA	NA	NA	UP	NA	NA	NA	NA	NA	NA	NA	NA NA
60468_at	60468	LOC60468	BACH2	Lymphoid	NA	NA	NA	NA	UP	NA	NA	NA	NA	NA	NA	NA	NA NA
649_at	649	LOC649	BMP1	NA	NA	NA	NA	NA	UP	NA	NA	NA	NA	NA	NA	NA	NA NA
54785_at	54785	LOC54785	C17ORF59	NA	NA	NA	NA	NA	UP	NA	NA	NA	NA	NA	NA	NA	NA NA
26005_at	26005	LOC26005	C2CD3	NA	NA	NA	NA	NA	UP	NA	NA	NA	NA	NA	NA	NA	NA NA
402573_at	402573	LOC402573	C7ORF61	NA	NA	NA	NA	NA	UP	NA	NA	NA	NA	NA	NA	NA	NA NA
782_at	782	LOC782	CACNB1	NA	NA	NA	NA	NA	UP	NA	NA	NA	NA	NA	NA	NA	NA NA
50632_at	50632	LOC50632	CALY	NA	NA	NA	NA	NA	UP	NA	NA	NA	NA	NA	NA	NA	NA NA
817_at	817	LOC817	CAMK2D	NA	NA	NA	NA	NA	UP	NA	NA	NA	NA	NA	NA	NA	NA NA
23125_at	23125	LOC23125	CAMTA2	NA	NA	NA	NA	NA	UP	NA	NA	NA	NA	NA	NA	NA	NA NA
65981_at	65981	LOC65981	CAPRIN2	NA	NA	NA	NA	NA	UP	NA	NA	NA	NA	NA	NA	NA	NA NA
25790_at	25790	LOC25790	CCDC19	NA	NA	NA	NA	NA	UP	NA	NA	NA	NA	NA	NA	NA	NA NA
152137_at	152137	LOC152137	CCDC50	NA	NA	NA	NA	NA	UP	NA	NA	NA	NA	NA	NA	NA	NA NA
79741_at	79741	LOC79741	CCDC7	NA	NA	NA	NA	NA	UP	NA	NA	NA	NA	NA	NA	NA	NA NA
146059_at	146059	LOC146059	CDAN1	NA	NA	NA	NA	NA	UP	NA	NA	NA	NA	NA	NA	NA	NA NA
53405_at	53405	LOC53405	CLIC5	NA	NA	NA	NA	NA	UP	NA	NA	NA	NA	NA	NA	NA	NA NA
254263_at	254263	LOC254263	CNIH2	NA	NA	NA	NA	NA	UP	NA	NA	NA	NA	NA	NA	NA	NA NA
57585_at	57585	LOC57585	CRAMP1L	NA	NA	NA	NA	NA	UP	NA	NA	NA	NA	NA	NA	NA	NA NA
9586_at	9586	LOC9586	CREB5	NA	NA	NA	NA	NA	UP	NA	NA	NA	NA	NA	NA	NA	NA NA
1446_at	1446	LOC1446	CSN1S1	NA	NA	NA	NA	NA	UP	NA	NA	NA	NA	NA	NA	NA	NA NA
9150_at	9150	LOC9150	CTDP1	NA	NA	NA	NA	NA	UP	NA	NA	NA	NA	NA	NA	NA	NA NA
90379_at	90379	LOC90379	DCAF15	NA	NA	NA	NA	NA	UP	NA	NA	NA	NA	NA	NA	NA	NA NA
84516_at	84516	LOC84516	DCTN5	NA	NA	NA	NA	NA	UP	NA	NA	NA	NA	NA	NA	NA	NA NA
27185_at	27185	LOC27185	DISC1	NA	NA	NA	NA	NA	UP	NA	NA	NA	NA	NA	NA	NA	NA NA
1788_at	1788	LOC1788	DNMT3A	NA	NA	NA	NA	NA	UP	NA	NA	NA	NA	NA	NA	NA	NA NA
8193_at	8193	LOC8193	DPF1	NA	NA	NA	NA	NA	UP	NA	NA	NA	NA	NA	NA	NA	NA NA
196403_at	196403	LOC196403	DTX3	NA	NA	NA	NA	NA	UP	NA	NA	NA	NA	NA	NA	NA	NA NA
1854_at	1854	LOC1854	DUT	Lymphoid	NA	NA	NA	NA	UP	NA	NA	NA	NA	NA	NA	NA	NA NA
79733_at	79733	LOC79733	E2F8	NA	NA	NA	NA	NA	UP	NA	NA	NA	NA	NA	NA	NA	NA NA
23085_at	23085	LOC23085	ERC1	NA	NA	NA	NA	NA	UP	NA	NA	NA	NA	NA	NA	NA	NA NA
8822_at	8822	LOC8822	FGF17	NA	NA	NA	NA	NA	UP	NA	NA	NA	NA	NA	NA	NA	NA NA
9758_at	9758	LOC9758	FRMPD4	NA	NA	NA	NA	NA	UP	NA	NA	NA	NA	NA	NA	NA	NA NA
24140_at	24140	LOC24140	FTSJ1	NA	NA	NA	NA	NA	UP	NA	NA	NA	NA	NA	NA	NA	NA NA
51343_at	51343	LOC51343	FZR1	NA	NA	NA	NA	NA	UP	NA	NA	NA	NA	NA	NA	NA	NA NA
8522_at	8522	LOC8522	GAS7	NA	NA	NA	NA	NA	UP	NA	NA	NA	NA	NA	NA	NA	NA NA
2674_at	2674	LOC2674	GFRA1	NA	NA	NA	NA	NA	UP	NA	NA	NA	NA	NA	NA	NA	NA NA
221914_at	221914	LOC221914	GPC2	NA	NA	NA	NA	NA	UP	NA	NA	NA	NA	NA	NA	NA	NA NA
3556_at	3556	LOC3556	IL1RAP	NA	NA	NA	NA	NA	UP	NA	NA	NA	NA	NA	NA	NA	NA NA
27130_at	27130	LOC27130	INVS	NA	NA	NA	NA	NA	UP	NA	NA	NA	NA	NA	NA	NA	NA NA
9196_at	9196	LOC9196	KCNAB3	NA	NA	NA	NA	NA	UP	NA	NA	NA	NA	NA	NA	NA	NA NA
23135_at	23135	LOC23135	KDM6B	Myeloid	NA	NA	NA	NA	UP	NA	NA	NA	NA	NA	NA	NA	NA NA
23313_at	23313	LOC23313	KIAA0930	Myeloid	NA	NA	NA	NA	UP	NA	NA	NA	NA	NA	NA	NA	NA NA
339451_at	339451	LOC339451	KLHL17	NA	NA	NA	NA	NA	UP	NA	NA	NA	NA	NA	NA	NA	NA NA
65095_at	65095	LOC65095	KRI1	NA	NA	NA	NA	NA	UP	NA	NA	NA	NA	NA	NA	NA	NA NA
80774_at	80774	LOC80774	LIMD2	NA	NA	NA	NA	NA	UP	NA	NA	NA	NA	NA	NA	NA	NA NA
4010_at	4010	LOC4010	LMX1B	NA	NA	NA	NA	NA	UP	NA	NA	NA	NA	NA	NA	NA	NA NA
4046_at	4046	LOC4046	LSP1	Multiple	NA	NA	NA	NA	UP	NA	NA	NA	NA	NA	NA	NA	NA NA
4052_at	4052	LOC4052	LTBP1	NA	NA	NA	NA	NA	UP	NA	NA	NA	NA	NA	NA	NA	NA NA
378938_at	378938	LOC378938	MALAT1	NA	NA	NA	NA	NA	UP	NA	NA	NA	NA	NA	NA	NA	NA NA
84557_at	84557	LOC84557	MAP1LC3A	NA	NA	NA	NA	NA	UP	NA	NA	NA	NA	NA	NA	NA	NA NA
4140_at	4140	LOC4140	MARK3	NA	NA	NA	NA	NA	UP	NA	NA	NA	NA	NA	NA	NA	NA NA
4150_at	4150	LOC4150	MAZ	NA	NA	NA	NA	NA	UP	NA	NA	NA	NA	NA	NA	NA	NA NA
51102_at	51102	LOC51102	MECR	NA	NA	NA	NA	NA	UP	NA	NA	NA	NA	NA	NA	NA	NA NA
84689_at	84689	LOC84689	MS4A14	NA	NA	NA	NA	NA	UP	NA	NA	NA	NA	NA	NA	NA	NA NA
85366_at	85366	LOC85366	MYLK2	NA	NA	NA	NA	NA	UP	NA	NA	NA	NA	NA	NA	NA	NA NA
80218_at	80218	LOC80218	NAA50	Multiple	NA	NA	NA	NA	UP	NA	NA	NA	NA	NA	NA	NA	NA NA
129807_at	129807	LOC129807	NEU4	NA	NA	NA	NA	NA	UP	NA	NA	NA	NA	NA	NA	NA	NA NA
4772_at	4772	LOC4772	NFATC1	NA	NA	NA	NA	NA	UP	NA	NA	NA	NA	NA	NA	NA	NA NA
1482_at	1482	LOC1482	NKX2-5	NA	NA	NA	NA	NA	UP	NA	NA	NA	NA	NA	NA	NA	NA NA
9423_at	9423	LOC9423	NTN1	NA	NA	NA	NA	NA	UP	NA	NA	NA	NA	NA	NA	NA	NA NA
4914_at	4914	LOC4914	NTRK1	NA	NA	NA	NA	NA	UP	NA	NA	NA	NA	NA	NA	NA	NA NA
64236_at	64236	LOC64236	PDLIM2	NA	NA	NA	NA	NA	UP	NA	NA	NA	NA	NA	NA	NA	NA NA
55011_at	55011	LOC55011	PIH1D1	NA	NA	NA	NA	NA	UP	NA	NA	NA	NA	NA	NA	NA	NA NA
5308_at	5308	LOC5308	PITX2	NA	NA	NA	NA	NA	UP	NA	NA	NA	NA	NA	NA	NA	NA NA
5331_at	5331	LOC5331	PLCB3	NA	NA	NA	NA	NA	UP	NA	NA	NA	NA	NA	NA	NA	NA NA
5339_at	5339	LOC5339	PLEC	NA	NA	NA	NA	NA	UP	NA	NA	NA	NA	NA	NA	NA	NA NA
5496_at	5496	LOC5496	PPM1G	NA	NA	NA	NA	NA	UP	NA	NA	NA	NA	NA	NA	NA	NA NA
28227_at	NA	NA	PPP2R3B || ? || ?	NA	NA	NA	NA	NA	UP	NA	NA	NA	NA	NA	NA	NA	NA NA
11186_at	11186	LOC11186	RASSF1	NA	NA	NA	NA	NA	UP	NA	NA	NA	NA	NA	NA	NA	NA NA
5935_at	5935	LOC5935	RBM3	NA	NA	NA	NA	NA	UP	NA	NA	NA	NA	NA	NA	NA	NA NA
29115_at	29115	LOC29115	SAP30BP	NA	NA	NA	NA	NA	UP	NA	NA	NA	NA	NA	NA	NA	NA NA
59343_at	59343	LOC59343	SENP2	NA	NA	NA	NA	NA	UP	NA	NA	NA	NA	NA	NA	NA	NA NA
9057_at	9057	LOC9057	SLC7A6	NA	NA	NA	NA	NA	UP	NA	NA	NA	NA	NA	NA	NA	NA NA
10650_at	10650	LOC10650	SLMO1	NA	NA	NA	NA	NA	UP	NA	NA	NA	NA	NA	NA	NA	NA NA
84973_at	84973	LOC84973	SNHG7	NA	NA	NA	NA	NA	UP	NA	NA	NA	NA	NA	NA	NA	NA NA
9655_at	9655	LOC9655	SOCS5	NA	NA	NA	NA	NA	UP	NA	NA	NA	NA	NA	NA	NA	NA NA
6670_at	6670	LOC6670	SP3	NA	NA	NA	NA	NA	UP	NA	NA	NA	NA	NA	NA	NA	NA NA
399473_at	399473	LOC399473	SPRED3	NA	NA	NA	NA	NA	UP	NA	NA	NA	NA	NA	NA	NA	NA NA
170463_at	170463	LOC170463	SSBP4	NA	NA	NA	NA	NA	UP	NA	NA	NA	NA	NA	NA	NA	NA NA
10469_at	10469	LOC10469	TIMM44	NA	NA	NA	NA	NA	UP	NA	NA	NA	NA	NA	NA	NA	NA NA
340205_at	340205	LOC340205	TREML1	NA	NA	NA	NA	NA	UP	NA	NA	NA	NA	NA	NA	NA	NA NA
11219_at	11219	LOC11219	TREX2	NA	NA	NA	NA	NA	UP	NA	NA	NA	NA	NA	NA	NA	NA NA
23508_at	23508	LOC23508	TTC9	NA	NA	NA	NA	NA	UP	NA	NA	NA	NA	NA	NA	NA	NA NA
7352_at	7352	LOC7352	UCP3	NA	NA	NA	NA	NA	UP	NA	NA	NA	NA	NA	NA	NA	NA NA
201294_at	201294	LOC201294	UNC13D	NA	NA	NA	NA	NA	UP	NA	NA	NA	NA	NA	NA	NA	NA NA
10785_at	10785	LOC10785	WDR4	Lymphoid	NA	NA	NA	NA	UP	NA	NA	NA	NA	NA	NA	NA	NA NA
7468_at	7468	LOC7468	WHSC1	NA	NA	NA	NA	NA	UP	NA	NA	NA	NA	NA	NA	NA	NA NA
91746_at	91746	LOC91746	YTHDC1	NA	NA	NA	NA	NA	UP	NA	NA	NA	NA	NA	NA	NA	NA NA
404281_at	404281	LOC404281	YY2	NA	NA	NA	NA	NA	UP	NA	NA	NA	NA	NA	NA	NA	NA NA
283933_at	283933	LOC283933	ZNF843	NA	NA	NA	NA	NA	UP	NA	NA	NA	NA	NA	NA	NA	NA NA
23140_at	23140	LOC23140	ZZEF1	NA	NA	NA	NA	NA	UP	NA	NA	NA	NA	NA	NA	NA	NA NA
947_at	947	LOC947	CD34	NA	NA	NA	NA	NA	NA	McDermott_Angio	NA	NA	NA	NA	NA	NA	NA NA
11082_at	11082	LOC11082	ESM1	NA	NA	NA	NA	NA	NA	McDermott_Angio	NA	NA	NA	NA	NA	NA	NA NA
3791_at	3791	LOC3791	KDR	NA	NA	NA	NA	NA	NA	McDermott_Angio	NA	NA	NA	NA	NA	NA	NA NA
5175_at	5175	LOC5175	PECAM1	NA	NA	NA	NA	NA	NA	McDermott_Angio	NA	NA	NA	NA	NA	NA	NA NA
3576_at	3576	LOC3576	IL8	Myeloid	NA	NA	NA	NA	NA	McDermott_Myeloid	NA	cluster2	NA	Short_Nano	NA	NA	NA NA
2920_at	2920	LOC2920	CXCL2	NA	NA	NA	NA	NA	NA	McDermott_Myeloid	NA	NA	NA	Short_Nano_RNAseq	NA	NA	NA NA
2921_at	2921	LOC2921	CXCL3	Monocyte	NA	NA	NA	NA	NA	McDermott_Myeloid	NA	NA	NA	Short_Nano_RNAseq	NA	NA	NA NA
925_at	925	LOC925	CD8A	T Cell	NA	NA	NA	NA	NA	McDermott_Teff	Merck_Up	NA	NA	NA	NA	NA	NA NA
8320_at	8320	LOC8320	EOMES	Lymphoid	NA	NA	NA	NA	NA	McDermott_Teff	NA	NA	NA	NA	NA	Javelin26	NA NA
5551_at	5551	LOC5551	PRF1	Lymphoid	NA	NA	NA	NA	NA	McDermott_Teff	NA	NA	NA	NA	NA	Javelin26	NA NA
3458_at	3458	LOC3458	IFNG	Lymphoid	NA	NA	NA	NA	NA	McDermott_Teff	NA	NA	NA	NA	NA	NA	NA NA
80381_at	80381	LOC80381	CD276	NA	NA	NA	NA	NA	NA	NA	Merck_Down	NA	NA	NA	NA	NA	NA NA
4818_at	4818	LOC4818	NKG7	Lymphoid	NA	NA	NA	NA	NA	NA	Merck_Up	NA	CM009_up	NA	NA	NA	NA NA
939_at	939	LOC939	CD27	Lymphoid	NA	NA	NA	NA	NA	NA	Merck_Up	NA	NA	NA	NA	NA	NA NA
10663_at	10663	LOC10663	CXCR6	T Cell	NA	NA	NA	NA	NA	NA	Merck_Up	NA	NA	NA	NA	NA	NA NA
3133_at	3133	LOC3133	HLA-E	NA	NA	NA	NA	NA	NA	NA	Merck_Up	NA	NA	NA	NA	NA	NA NA
3902_at	3902	LOC3902	LAG3	T Cell	NA	NA	NA	NA	NA	NA	Merck_Up	NA	NA	NA	NA	NA	NA NA
80380_at	80380	LOC80380	PDCD1LG2	Dendritic Cell	NA	NA	NA	NA	NA	NA	Merck_Up	NA	NA	NA	NA	NA	NA NA
201633_at	201633	LOC201633	TIGIT	Lymphoid	NA	NA	NA	NA	NA	NA	Merck_Up	NA	NA	NA	NA	NA	NA NA
9474_at	9474	LOC9474	ATG5	NA	NA	NA	NA	NA	NA	NA	NA	cluster1	NA	NA	NA	NA	NA NA
64343_at	64343	LOC64343	AZI2	NA	NA	NA	NA	NA	NA	NA	NA	cluster1	NA	NA	NA	NA	NA NA
843_at	843	LOC843	CASP10	NA	NA	NA	NA	NA	NA	NA	NA	cluster1	NA	NA	NA	NA	NA NA
1147_at	1147	LOC1147	CHUK	NA	NA	NA	NA	NA	NA	NA	NA	cluster1	NA	NA	NA	NA	NA NA
1540_at	1540	LOC1540	CYLD	Multiple	NA	NA	NA	NA	NA	NA	NA	cluster1	NA	NA	NA	NA	NA NA
1654_at	1654	LOC1654	DDX3X	NA	NA	NA	NA	NA	NA	NA	NA	cluster1	NA	NA	NA	NA	NA NA
4214_at	4214	LOC4214	MAP3K1	NA	NA	NA	NA	NA	NA	NA	NA	cluster1	NA	NA	NA	NA	NA NA
6885_at	6885	LOC6885	MAP3K7	NA	NA	NA	NA	NA	NA	NA	NA	cluster1	NA	NA	NA	NA	NA NA
5602_at	5602	LOC5602	MAPK10	NA	NA	NA	NA	NA	NA	NA	NA	cluster1	NA	NA	NA	NA	NA NA
1432_at	1432	LOC1432	MAPK14	NA	NA	NA	NA	NA	NA	NA	NA	cluster1	NA	NA	NA	NA	NA NA
5599_at	5599	LOC5599	MAPK8	NA	NA	NA	NA	NA	NA	NA	NA	cluster1	NA	NA	NA	NA	NA NA
5601_at	5601	LOC5601	MAPK9	NA	NA	NA	NA	NA	NA	NA	NA	cluster1	NA	NA	NA	NA	NA NA
54941_at	54941	LOC54941	RNF125	Lymphoid	NA	NA	NA	NA	NA	NA	NA	cluster1	NA	NA	NA	NA	NA NA
80143_at	80143	LOC80143	SIKE1	NA	NA	NA	NA	NA	NA	NA	NA	cluster1	NA	NA	NA	NA	NA NA
10010_at	10010	LOC10010	TANK	Multiple	NA	NA	NA	NA	NA	NA	NA	cluster1	NA	NA	NA	NA	NA NA
29110_at	29110	LOC29110	TBK1	NA	NA	NA	NA	NA	NA	NA	NA	cluster1	NA	NA	NA	NA	NA NA
7187_at	7187	LOC7187	TRAF3	NA	NA	NA	NA	NA	NA	NA	NA	cluster1	NA	NA	NA	NA	NA NA
7189_at	7189	LOC7189	TRAF6	NA	NA	NA	NA	NA	NA	NA	NA	cluster1	NA	NA	NA	NA	NA NA
9140_at	9140	LOC9140	ATG12	NA	NA	NA	NA	NA	NA	NA	NA	cluster2	NA	NA	NA	NA	NA NA
26007_at	26007	LOC26007	DAK	NA	NA	NA	NA	NA	NA	NA	NA	cluster2	NA	NA	NA	NA	NA NA
8653_at	8653	LOC8653	DDX3Y	NA	NA	NA	NA	NA	NA	NA	NA	cluster2	NA	NA	NA	NA	NA NA
3456_at	3456	LOC3456	IFNB1	NA	NA	NA	NA	NA	NA	NA	NA	cluster2	NA	NA	NA	NA	NA NA
338376_at	338376	LOC338376	IFNE	NA	NA	NA	NA	NA	NA	NA	NA	cluster2	NA	NA	NA	NA	NA NA
9641_at	9641	LOC9641	IKBKE	NA	NA	NA	NA	NA	NA	NA	NA	cluster2	NA	NA	NA	NA	NA NA
3592_at	3592	LOC3592	IL12A	NA	NA	NA	NA	NA	NA	NA	NA	cluster2	NA	NA	NA	NA	NA NA
3593_at	3593	LOC3593	IL12B	Myeloid	NA	NA	NA	NA	NA	NA	NA	cluster2	NA	NA	NA	NA	NA NA
6300_at	6300	LOC6300	MAPK12	NA	NA	NA	NA	NA	NA	NA	NA	cluster2	NA	NA	NA	NA	NA NA
5603_at	5603	LOC5603	MAPK13	NA	NA	NA	NA	NA	NA	NA	NA	cluster2	NA	NA	NA	NA	NA NA
79671_at	79671	LOC79671	NLRX1	NA	NA	NA	NA	NA	NA	NA	NA	cluster2	NA	NA	NA	NA	NA NA
340061_at	340061	LOC340061	TMEM173	NA	NA	NA	NA	NA	NA	NA	NA	cluster2	NA	NA	NA	NA	NA NA
7124_at	7124	LOC7124	TNF	Multiple	NA	NA	NA	NA	NA	NA	NA	cluster2	NA	NA	NA	NA	NA NA
8717_at	8717	LOC8717	TRADD	Multiple	NA	NA	NA	NA	NA	NA	NA	cluster2	NA	NA	NA	NA	NA NA
8772_at	8772	LOC8772	FADD	NA	NA	NA	NA	NA	NA	NA	NA	cluster3	NA	NA	NA	NA	NA NA
3551_at	3551	LOC3551	IKBKB	NA	NA	NA	NA	NA	NA	NA	NA	cluster3	NA	NA	NA	NA	NA NA
8517_at	8517	LOC8517	IKBKG	NA	NA	NA	NA	NA	NA	NA	NA	cluster3	NA	NA	NA	NA	NA NA
3661_at	3661	LOC3661	IRF3	NA	NA	NA	NA	NA	NA	NA	NA	cluster3	NA	NA	NA	NA	NA NA
5600_at	5600	LOC5600	MAPK11	NA	NA	NA	NA	NA	NA	NA	NA	cluster3	NA	NA	NA	NA	NA NA
57506_at	57506	LOC57506	MAVS	NA	NA	NA	NA	NA	NA	NA	NA	cluster3	NA	NA	NA	NA	NA NA
4793_at	4793	LOC4793	NFKBIB	NA	NA	NA	NA	NA	NA	NA	NA	cluster3	NA	NA	NA	NA	NA NA
55593_at	55593	LOC55593	OTUD5	NA	NA	NA	NA	NA	NA	NA	NA	cluster3	NA	NA	NA	NA	NA NA
5300_at	5300	LOC5300	PIN1	NA	NA	NA	NA	NA	NA	NA	NA	cluster3	NA	NA	NA	NA	NA NA
5970_at	5970	LOC5970	RELA	NA	NA	NA	NA	NA	NA	NA	NA	cluster3	NA	NA	NA	NA	NA NA
9755_at	9755	LOC9755	TBKBP1	NA	NA	NA	NA	NA	NA	NA	NA	cluster3	NA	NA	NA	NA	NA NA
7186_at	7186	LOC7186	TRAF2	NA	NA	NA	NA	NA	NA	NA	NA	cluster3	NA	NA	NA	NA	NA NA
3446_at	3446	LOC3446	IFNA10	NA	NA	NA	NA	NA	NA	NA	NA	unused	NA	NA	NA	NA	NA NA
3448_at	3448	LOC3448	IFNA14	NA	NA	NA	NA	NA	NA	NA	NA	unused	NA	NA	NA	NA	NA NA
3449_at	3449	LOC3449	IFNA16	NA	NA	NA	NA	NA	NA	NA	NA	unused	NA	NA	NA	NA	NA NA
3440_at	3440	LOC3440	IFNA2	NA	NA	NA	NA	NA	NA	NA	NA	unused	NA	NA	NA	NA	NA NA
3452_at	3452	LOC3452	IFNA21	NA	NA	NA	NA	NA	NA	NA	NA	unused	NA	NA	NA	NA	NA NA
3441_at	3441	LOC3441	IFNA4	NA	NA	NA	NA	NA	NA	NA	NA	unused	NA	NA	NA	NA	NA NA
3442_at	3442	LOC3442	IFNA5	NA	NA	NA	NA	NA	NA	NA	NA	unused	NA	NA	NA	NA	NA NA
3443_at	3443	LOC3443	IFNA6	NA	NA	NA	NA	NA	NA	NA	NA	unused	NA	NA	NA	NA	NA NA
3444_at	3444	LOC3444	IFNA7	NA	NA	NA	NA	NA	NA	NA	NA	unused	NA	NA	NA	NA	NA NA
3445_at	3445	LOC3445	IFNA8	NA	NA	NA	NA	NA	NA	NA	NA	unused	NA	NA	NA	NA	NA NA
56832_at	56832	LOC56832	IFNK	NA	NA	NA	NA	NA	NA	NA	NA	unused	NA	NA	NA	NA	NA NA
3467_at	3467	LOC3467	IFNW1	NA	NA	NA	NA	NA	NA	NA	NA	unused	NA	NA	NA	NA	NA NA
22903_at	22903	LOC22903	BTBD3	NA	NA	NA	NA	NA	NA	NA	NA	NA	CM009_down	NA	NA	NA	NA NA
686_at	686	LOC686	BTD	NA	NA	NA	NA	NA	NA	NA	NA	NA	CM009_down	NA	NA	NA	NA NA
91768_at	91768	LOC91768	CABLES1	NA	NA	NA	NA	NA	NA	NA	NA	NA	CM009_down	NA	NA	NA	NA NA
256309_at	256309	LOC256309	CCDC110	NA	NA	NA	NA	NA	NA	NA	NA	NA	CM009_down	NA	NA	NA	NA NA
153090_at	153090	LOC153090	DAB2IP	NA	NA	NA	NA	NA	NA	NA	NA	NA	CM009_down	NA	NA	NA	NA NA
131118_at	131118	LOC131118	DNAJC19	NA	NA	NA	NA	NA	NA	NA	NA	NA	CM009_down	NA	NA	NA	NA NA
9666_at	9666	LOC9666	DZIP3	NA	NA	NA	NA	NA	NA	NA	NA	NA	CM009_down	NA	NA	NA	NA NA
2036_at	2036	LOC2036	EPB41L1	NA	NA	NA	NA	NA	NA	NA	NA	NA	CM009_down	NA	NA	NA	NA NA
150864_at	150864	LOC150864	FAM117B	NA	NA	NA	NA	NA	NA	NA	NA	NA	CM009_down	NA	NA	NA	NA NA
2444_at	2444	LOC2444	FRK	NA	NA	NA	NA	NA	NA	NA	NA	NA	CM009_down	NA	NA	NA	NA NA
79940_at	79940	LOC79940	LINC00472	NA	NA	NA	NA	NA	NA	NA	NA	NA	CM009_down	NA	NA	NA	NA NA
254013_at	254013	LOC254013	METTL20	NA	NA	NA	NA	NA	NA	NA	NA	NA	CM009_down	NA	NA	NA	NA NA
57509_at	57509	LOC57509	MTUS1	NA	NA	NA	NA	NA	NA	NA	NA	NA	CM009_down	NA	NA	NA	NA NA
4781_at	4781	LOC4781	NFIB	NA	NA	NA	NA	NA	NA	NA	NA	NA	CM009_down	NA	NA	NA	NA NA
255743_at	255743	LOC255743	NPNT	NA	NA	NA	NA	NA	NA	NA	NA	NA	CM009_down	NA	NA	NA	NA NA
59338_at	59338	LOC59338	PLEKHA1	NA	NA	NA	NA	NA	NA	NA	NA	NA	CM009_down	NA	NA	NA	NA NA
51090_at	51090	LOC51090	PLLP	NA	NA	NA	NA	NA	NA	NA	NA	NA	CM009_down	NA	NA	NA	NA NA
5792_at	5792	LOC5792	PTPRF	NA	NA	NA	NA	NA	NA	NA	NA	NA	CM009_down	NA	NA	NA	NA NA
11030_at	11030	LOC11030	RBPMS	NA	NA	NA	NA	NA	NA	NA	NA	NA	CM009_down	NA	NA	NA	NA NA
348093_at	348093	LOC348093	RBPMS2	NA	NA	NA	NA	NA	NA	NA	NA	NA	CM009_down	NA	NA	NA	NA NA
220441_at	220441	LOC220441	RNF152	NA	NA	NA	NA	NA	NA	NA	NA	NA	CM009_down	NA	NA	NA	NA NA
94009_at	94009	LOC94009	SERHL	NA	NA	NA	NA	NA	NA	NA	NA	NA	CM009_down	NA	NA	NA	NA NA
283652_at	283652	LOC283652	SLC24A5	NA	NA	NA	NA	NA	NA	NA	NA	NA	CM009_down	NA	NA	NA	NA NA
4090_at	4090	LOC4090	SMAD5	NA	NA	NA	NA	NA	NA	NA	NA	NA	CM009_down	NA	NA	NA	NA NA
11037_at	11037	LOC11037	STON1	NA	NA	NA	NA	NA	NA	NA	NA	NA	CM009_down	NA	NA	NA	NA NA
10579_at	10579	LOC10579	TACC2	NA	NA	NA	NA	NA	NA	NA	NA	NA	CM009_down	NA	NA	NA	NA NA
157695_at	157695	LOC157695	TDRP	NA	NA	NA	NA	NA	NA	NA	NA	NA	CM009_down	NA	NA	NA	NA NA
23331_at	23331	LOC23331	TTC28	NA	NA	NA	NA	NA	NA	NA	NA	NA	CM009_down	NA	NA	NA	NA NA
84747_at	84747	LOC84747	UNC119B	NA	NA	NA	NA	NA	NA	NA	NA	NA	CM009_down	NA	NA	NA	NA NA
58499_at	58499	LOC58499	ZNF462	NA	NA	NA	NA	NA	NA	NA	NA	NA	CM009_down	NA	NA	NA	NA NA
619279_at	619279	LOC619279	ZNF704	NA	NA	NA	NA	NA	NA	NA	NA	NA	CM009_down	NA	NA	NA	NA NA
9051_at	9051	LOC9051	PSTPIP1	NA	NA	NA	NA	NA	NA	NA	NA	NA	CM009_up	NA	NA	Javelin26	NA NA
64333_at	64333	LOC64333	ARHGAP9	Multiple	NA	NA	NA	NA	NA	NA	NA	NA	CM009_up	NA	NA	NA	NA NA
10538_at	10538	LOC10538	BATF	Lymphoid	NA	NA	NA	NA	NA	NA	NA	NA	CM009_up	NA	NA	NA	NA NA
51411_at	51411	LOC51411	BIN2	Multiple	NA	NA	NA	NA	NA	NA	NA	NA	CM009_up	NA	NA	NA	NA NA
117144_at	117144	LOC117144	CATSPER1	NA	NA	NA	NA	NA	NA	NA	NA	NA	CM009_up	NA	NA	NA	NA NA
55013_at	55013	LOC55013	CCDC109B	Multiple	NA	NA	NA	NA	NA	NA	NA	NA	CM009_up	NA	NA	NA	NA NA
145508_at	145508	LOC145508	CEP128	NA	NA	NA	NA	NA	NA	NA	NA	NA	CM009_up	NA	NA	NA	NA NA
1675_at	1675	LOC1675	CFD	NA	NA	NA	NA	NA	NA	NA	NA	NA	CM009_up	NA	NA	NA	NA NA
8483_at	8483	LOC8483	CILP	NA	NA	NA	NA	NA	NA	NA	NA	NA	CM009_up	NA	NA	NA	NA NA
9976_at	9976	LOC9976	CLEC2B	Multiple	NA	NA	NA	NA	NA	NA	NA	NA	CM009_up	NA	NA	NA	NA NA
79827_at	79827	LOC79827	CLMP	NA	NA	NA	NA	NA	NA	NA	NA	NA	CM009_up	NA	NA	NA	NA NA
1521_at	1521	LOC1521	CTSW	Lymphoid	NA	NA	NA	NA	NA	NA	NA	NA	CM009_up	NA	NA	NA	NA NA
1522_at	1522	LOC1522	CTSZ	Myeloid	NA	NA	NA	NA	NA	NA	NA	NA	CM009_up	NA	NA	NA	NA NA
27123_at	27123	LOC27123	DKK2	NA	NA	NA	NA	NA	NA	NA	NA	NA	CM009_up	NA	NA	NA	NA NA
144455_at	144455	LOC144455	E2F7	NA	NA	NA	NA	NA	NA	NA	NA	NA	CM009_up	NA	NA	NA	NA NA
79180_at	79180	LOC79180	EFHD2	Multiple	NA	NA	NA	NA	NA	NA	NA	NA	CM009_up	NA	NA	NA	NA NA
25975_at	25975	LOC25975	EGFL6	NA	NA	NA	NA	NA	NA	NA	NA	NA	CM009_up	NA	NA	NA	NA NA
254102_at	254102	LOC254102	EHBP1L1	NA	NA	NA	NA	NA	NA	NA	NA	NA	CM009_up	NA	NA	NA	NA NA
2124_at	2124	LOC2124	EVI2B	Multiple	NA	NA	NA	NA	NA	NA	NA	NA	CM009_up	NA	NA	NA	NA NA
54757_at	54757	LOC54757	FAM20A	NA	NA	NA	NA	NA	NA	NA	NA	NA	CM009_up	NA	NA	NA	NA NA
115352_at	115352	LOC115352	FCRL3	Lymphoid	NA	NA	NA	NA	NA	NA	NA	NA	CM009_up	NA	NA	NA	NA NA
752_at	752	LOC752	FMNL1	Multiple	NA	NA	NA	NA	NA	NA	NA	NA	CM009_up	NA	NA	NA	NA NA
53827_at	53827	LOC53827	FXYD5	Multiple	NA	NA	NA	NA	NA	NA	NA	NA	CM009_up	NA	NA	NA	NA NA
4616_at	4616	LOC4616	GADD45B	NA	NA	NA	NA	NA	NA	NA	NA	NA	CM009_up	NA	NA	NA	NA NA
115362_at	115362	LOC115362	GBP5	Multiple	NA	NA	NA	NA	NA	NA	NA	NA	CM009_up	NA	NA	NA	NA NA
9945_at	9945	LOC9945	GFPT2	NA	NA	NA	NA	NA	NA	NA	NA	NA	CM009_up	NA	NA	NA	NA NA
10804_at	10804	LOC10804	GJB6	NA	NA	NA	NA	NA	NA	NA	NA	NA	CM009_up	NA	NA	NA	NA NA
3002_at	3002	LOC3002	GZMB	Lymphoid	NA	NA	NA	NA	NA	NA	NA	NA	CM009_up	NA	NA	NA	NA NA
3037_at	3037	LOC3037	HAS2	NA	NA	NA	NA	NA	NA	NA	NA	NA	CM009_up	NA	NA	NA	NA NA
8355_at	8355	LOC8355	HIST1H3G	NA	NA	NA	NA	NA	NA	NA	NA	NA	CM009_up	NA	NA	NA	NA NA
147920_at	147920	LOC147920	IGFL2	NA	NA	NA	NA	NA	NA	NA	NA	NA	CM009_up	NA	NA	NA	NA NA
7850_at	7850	LOC7850	IL1R2	NA	NA	NA	NA	NA	NA	NA	NA	NA	CM009_up	NA	NA	NA	NA NA
55196_at	55196	LOC55196	KIAA1551	NA	NA	NA	NA	NA	NA	NA	NA	NA	CM009_up	NA	NA	NA	NA NA
4050_at	4050	LOC4050	LTB	Multiple	NA	NA	NA	NA	NA	NA	NA	NA	CM009_up	NA	NA	NA	NA NA
4314_at	4314	LOC4314	MMP3	NA	NA	NA	NA	NA	NA	NA	NA	NA	CM009_up	NA	NA	NA	NA NA
4542_at	4542	LOC4542	MYO1F	Multiple	NA	NA	NA	NA	NA	NA	NA	NA	CM009_up	NA	NA	NA	NA NA
5179_at	5179	LOC5179	PENK	NA	NA	NA	NA	NA	NA	NA	NA	NA	CM009_up	NA	NA	NA	NA NA
5341_at	5341	LOC5341	PLEK	Multiple	NA	NA	NA	NA	NA	NA	NA	NA	CM009_up	NA	NA	NA	NA NA
51177_at	51177	LOC51177	PLEKHO1	NA	NA	NA	NA	NA	NA	NA	NA	NA	CM009_up	NA	NA	NA	NA NA
196051_at	196051	LOC196051	PPAPDC1A	NA	NA	NA	NA	NA	NA	NA	NA	NA	CM009_up	NA	NA	NA	NA NA
84106_at	84106	LOC84106	PRAM1	Monocyte	NA	NA	NA	NA	NA	NA	NA	NA	CM009_up	NA	NA	NA	NA NA
79037_at	79037	LOC79037	PVRIG	NA	NA	NA	NA	NA	NA	NA	NA	NA	CM009_up	NA	NA	NA	NA NA
5880_at	5880	LOC5880	RAC2	Multiple	NA	NA	NA	NA	NA	NA	NA	NA	CM009_up	NA	NA	NA	NA NA
64092_at	64092	LOC64092	SAMSN1	Multiple	NA	NA	NA	NA	NA	NA	NA	NA	CM009_up	NA	NA	NA	NA NA
7356_at	7356	LOC7356	SCGB1A1	NA	NA	NA	NA	NA	NA	NA	NA	NA	CM009_up	NA	NA	NA	NA NA
677815_at	677815	LOC677815	SNORA34	NA	NA	NA	NA	NA	NA	NA	NA	NA	CM009_up	NA	NA	NA	NA NA
11262_at	11262	LOC11262	SP140	NA	NA	NA	NA	NA	NA	NA	NA	NA	CM009_up	NA	NA	NA	NA NA
117289_at	117289	LOC117289	TAGAP	NA	NA	NA	NA	NA	NA	NA	NA	NA	CM009_up	NA	NA	NA	NA NA
84203_at	84203	LOC84203	TXNDC2	NA	NA	NA	NA	NA	NA	NA	NA	NA	CM009_up	NA	NA	NA	NA NA
7408_at	7408	LOC7408	VASP	Multiple	NA	NA	NA	NA	NA	NA	NA	NA	CM009_up	NA	NA	NA	NA NA
7454_at	7454	LOC7454	WAS	Multiple	NA	NA	NA	NA	NA	NA	NA	NA	CM009_up	NA	NA	NA	NA NA
94039_at	94039	LOC94039	ZNF101	Lymphoid	NA	NA	NA	NA	NA	NA	NA	NA	CM009_up	NA	NA	NA	NA NA
9910_at	9910	LOC9910	RABGAP1L	NA	NA	NA	NA	NA	NA	NA	NA	NA	CM009_up	NA	NA	NA	NA NA
929_at	929	LOC929	CD14	NA	NA	NA	NA	NA	NA	NA	NA	NA	NA	Nano	NA	NA	NA NA
23601_at	23601	LOC23601	CLEC5A	Monocyte	NA	NA	NA	NA	NA	NA	NA	NA	NA	Nano	NA	NA	NA NA
6372_at	6372	LOC6372	CXCL6	NA	NA	NA	NA	NA	NA	NA	NA	NA	NA	Nano	NA	NA	NA NA
3552_at	3552	LOC3552	IL1A	Monocyte	NA	NA	NA	NA	NA	NA	NA	NA	NA	Nano	NA	NA	NA NA
11009_at	11009	LOC11009	IL24	Monocyte	NA	NA	NA	NA	NA	NA	NA	NA	NA	Nano	NA	NA	NA NA
5473_at	5473	LOC5473	PPBP	Monocyte	NA	NA	NA	NA	NA	NA	NA	NA	NA	Nano	NA	NA	NA NA
7057_at	7057	LOC7057	THBS1	NA	NA	NA	NA	NA	NA	NA	NA	NA	NA	Nano	NA	NA	NA NA
51561_at	51561	LOC51561	IL23A	Multiple	NA	NA	NA	NA	NA	NA	NA	NA	NA	Nano_RNAseq	NA	NA	NA NA
342510_at	342510	LOC342510	CD300E	NA	NA	NA	NA	NA	NA	NA	NA	NA	NA	RNAseq	NA	NA	NA NA
22918_at	22918	LOC22918	CD93	NA	NA	NA	NA	NA	NA	NA	NA	NA	NA	RNAseq	NA	NA	NA NA
1440_at	1440	LOC1440	CSF3	NA	NA	NA	NA	NA	NA	NA	NA	NA	NA	RNAseq	NA	NA	NA NA
9427_at	9427	LOC9427	ECEL1	NA	NA	NA	NA	NA	NA	NA	NA	NA	NA	RNAseq	NA	NA	NA NA
3036_at	3036	LOC3036	HAS1	NA	NA	NA	NA	NA	NA	NA	NA	NA	NA	RNAseq	NA	NA	NA NA
3624_at	3624	LOC3624	INHBA	Myeloid	NA	NA	NA	NA	NA	NA	NA	NA	NA	RNAseq	NA	NA	NA NA
11240_at	11240	LOC11240	PADI2	NA	NA	NA	NA	NA	NA	NA	NA	NA	NA	RNAseq	NA	NA	NA NA
55022_at	55022	LOC55022	PID1	Monocyte	NA	NA	NA	NA	NA	NA	NA	NA	NA	RNAseq	NA	NA	NA NA
9056_at	9056	LOC9056	SLC7A7	NA	NA	NA	NA	NA	NA	NA	NA	NA	NA	RNAseq	NA	NA	NA NA
10610_at	10610	LOC10610	ST6GALNAC2	NA	NA	NA	NA	NA	NA	NA	NA	NA	NA	RNAseq	NA	NA	NA NA
5055_at	5055	LOC5055	SERPINB2	Monocyte	NA	NA	NA	NA	NA	NA	NA	NA	NA	Short	NA	NA	NA NA
3553_at	3553	LOC3553	IL1B	Monocyte	NA	NA	NA	NA	NA	NA	NA	NA	NA	Short_Nano	NA	NA	NA NA
6374_at	6374	LOC6374	CXCL5	Monocyte	NA	NA	NA	NA	NA	NA	NA	NA	NA	Short_Nano_RNAseq	NA	NA	NA NA
800_at	800	LOC800	CALD1	NA	NA	NA	NA	NA	NA	NA	NA	NA	NA	NA	EMTstroma	NA	NA NA
2014_at	2014	LOC2014	EMP3	NA	NA	NA	NA	NA	NA	NA	NA	NA	NA	NA	EMTstroma	NA	NA NA
2200_at	2200	LOC2200	FBN1	NA	NA	NA	NA	NA	NA	NA	NA	NA	NA	NA	EMTstroma	NA	NA NA
2316_at	2316	LOC2316	FLNA	NA	NA	NA	NA	NA	NA	NA	NA	NA	NA	NA	EMTstroma	NA	NA NA
2335_at	2335	LOC2335	FN1	NA	NA	NA	NA	NA	NA	NA	NA	NA	NA	NA	EMTstroma	NA	NA NA
2303_at	2303	LOC2303	FOXC2	NA	NA	NA	NA	NA	NA	NA	NA	NA	NA	NA	EMTstroma	NA	NA NA
3371_at	3371	LOC3371	TNC	NA	NA	NA	NA	NA	NA	NA	NA	NA	NA	NA	EMTstroma	NA	NA NA
914_at	914	LOC914	CD2	Lymphoid	NA	NA	NA	NA	NA	NA	NA	NA	NA	NA	NA	Javelin26	NA NA
51744_at	51744	LOC51744	CD244	NK Cell	NA	NA	NA	NA	NA	NA	NA	NA	NA	NA	NA	Javelin26	NA NA
923_at	923	LOC923	CD6	T Cell	NA	NA	NA	NA	NA	NA	NA	NA	NA	NA	NA	Javelin26	NA NA
926_at	926	LOC926	CD8B	T Cell	NA	NA	NA	NA	NA	NA	NA	NA	NA	NA	NA	Javelin26	NA NA
10225_at	10225	LOC10225	CD96	Lymphoid	NA	NA	NA	NA	NA	NA	NA	NA	NA	NA	NA	Javelin26	NA NA
8530_at	8530	LOC8530	CST7	Multiple	NA	NA	NA	NA	NA	NA	NA	NA	NA	NA	NA	Javelin26	NA NA
2672_at	2672	LOC2672	GFI1	NA	NA	NA	NA	NA	NA	NA	NA	NA	NA	NA	NA	Javelin26	NA NA
9402_at	9402	LOC9402	GRAP2	NA	NA	NA	NA	NA	NA	NA	NA	NA	NA	NA	NA	Javelin26	NA NA
3575_at	3575	LOC3575	IL7R	Multiple	NA	NA	NA	NA	NA	NA	NA	NA	NA	NA	NA	Javelin26	NA NA
3702_at	3702	LOC3702	ITK	Lymphoid	NA	NA	NA	NA	NA	NA	NA	NA	NA	NA	NA	Javelin26	NA NA
3824_at	3824	LOC3824	KLRD1	Lymphoid	NA	NA	NA	NA	NA	NA	NA	NA	NA	NA	NA	Javelin26	NA NA
197358_at	197358	LOC197358	NLRC3	Lymphoid	NA	NA	NA	NA	NA	NA	NA	NA	NA	NA	NA	Javelin26	NA NA
4068_at	4068	LOC4068	SH2D1A	NA	NA	NA	NA	NA	NA	NA	NA	NA	NA	NA	NA	Javelin26	NA NA
27240_at	27240	LOC27240	SIT1	NA	NA	NA	NA	NA	NA	NA	NA	NA	NA	NA	NA	Javelin26	NA NA
387357_at	387357	LOC387357	THEMIS	NA	NA	NA	NA	NA	NA	NA	NA	NA	NA	NA	NA	Javelin26	NA NA
50852_at	50852	LOC50852	TRAT1	T Cell	NA	NA	NA	NA	NA	NA	NA	NA	NA	NA	NA	Javelin26	NA NA
3738_at	3738	LOC3738	KCNA3	NA	NA	NA	NA	NA	NA	NA	NA	NA	NA	NA	NA	Javelin26	NA NA
64844_at	64844	LOC64844	2020-03-07	Multiple	NA	NA	NA	NA	NA	NA	NA	NA	NA	NA	NA	NA	NA NA
1731_at	1731	LOC1731	2020-09-01	Lymphoid	NA	NA	NA	NA	NA	NA	NA	NA	NA	NA	NA	NA	NA NA
23157_at	23157	LOC23157	2020-09-06	Lymphoid	NA	NA	NA	NA	NA	NA	NA	NA	NA	NA	NA	NA	NA NA
4363_at	4363	LOC4363	ABCC1	Myeloid	NA	NA	NA	NA	NA	NA	NA	NA	NA	NA	NA	NA	NA NA
11057_at	11057	LOC11057	ABHD2	Myeloid	NA	NA	NA	NA	NA	NA	NA	NA	NA	NA	NA	NA	NA NA
10006_at	10006	LOC10006	ABI1	Multiple	NA	NA	NA	NA	NA	NA	NA	NA	NA	NA	NA	NA	NA NA
27_at	27	LOC27	ABL2	Myeloid	NA	NA	NA	NA	NA	NA	NA	NA	NA	NA	NA	NA	NA NA
80325_at	80325	LOC80325	ABTB1	Neutrophil	NA	NA	NA	NA	NA	NA	NA	NA	NA	NA	NA	NA	NA NA
25841_at	25841	LOC25841	ABTB2	Dendritic Cell	NA	NA	NA	NA	NA	NA	NA	NA	NA	NA	NA	NA	NA NA
9744_at	9744	LOC9744	ACAP1	Multiple	NA	NA	NA	NA	NA	NA	NA	NA	NA	NA	NA	NA	NA NA
23527_at	23527	LOC23527	ACAP2	Multiple	NA	NA	NA	NA	NA	NA	NA	NA	NA	NA	NA	NA	NA NA
39_at	39	LOC39	ACAT2	Multiple	NA	NA	NA	NA	NA	NA	NA	NA	NA	NA	NA	NA	NA NA
55331_at	55331	LOC55331	ACER3	Myeloid	NA	NA	NA	NA	NA	NA	NA	NA	NA	NA	NA	NA	NA NA
54_at	54	LOC54	ACP5	Myeloid	NA	NA	NA	NA	NA	NA	NA	NA	NA	NA	NA	NA	NA NA
10097_at	10097	LOC10097	ACTR2	Multiple	NA	NA	NA	NA	NA	NA	NA	NA	NA	NA	NA	NA	NA NA
10096_at	10096	LOC10096	ACTR3	Multiple	NA	NA	NA	NA	NA	NA	NA	NA	NA	NA	NA	NA	NA NA
8038_at	8038	LOC8038	ADAM12	Dendritic Cell	NA	NA	NA	NA	NA	NA	NA	NA	NA	NA	NA	NA	NA NA
6868_at	6868	LOC6868	ADAM17	Myeloid	NA	NA	NA	NA	NA	NA	NA	NA	NA	NA	NA	NA	NA NA
8728_at	8728	LOC8728	ADAM19	Multiple	NA	NA	NA	NA	NA	NA	NA	NA	NA	NA	NA	NA	NA NA
101_at	101	LOC101	ADAM8	Multiple	NA	NA	NA	NA	NA	NA	NA	NA	NA	NA	NA	NA	NA NA
113_at	113	LOC113	ADCY7	Multiple	NA	NA	NA	NA	NA	NA	NA	NA	NA	NA	NA	NA	NA NA
83440_at	83440	LOC83440	ADPGK	Multiple	NA	NA	NA	NA	NA	NA	NA	NA	NA	NA	NA	NA	NA NA
27161_at	27161	LOC27161	AGO2	Multiple	NA	NA	NA	NA	NA	NA	NA	NA	NA	NA	NA	NA	NA NA
8540_at	8540	LOC8540	AGPS	Multiple	NA	NA	NA	NA	NA	NA	NA	NA	NA	NA	NA	NA	NA NA
199_at	199	LOC199	AIF1	Myeloid	NA	NA	NA	NA	NA	NA	NA	NA	NA	NA	NA	NA	NA NA
84883_at	84883	LOC84883	AIFM2	Myeloid	NA	NA	NA	NA	NA	NA	NA	NA	NA	NA	NA	NA	NA NA
158067_at	158067	LOC158067	AK8	Myeloid	NA	NA	NA	NA	NA	NA	NA	NA	NA	NA	NA	NA	NA NA
11214_at	11214	LOC11214	AKAP13	Multiple	NA	NA	NA	NA	NA	NA	NA	NA	NA	NA	NA	NA	NA NA
79647_at	79647	LOC79647	AKIRIN1	Multiple	NA	NA	NA	NA	NA	NA	NA	NA	NA	NA	NA	NA	NA NA
80709_at	80709	LOC80709	AKNA	Multiple	NA	NA	NA	NA	NA	NA	NA	NA	NA	NA	NA	NA	NA NA
84335_at	84335	LOC84335	AKT1S1	Multiple	NA	NA	NA	NA	NA	NA	NA	NA	NA	NA	NA	NA	NA NA
85365_at	85365	LOC85365	ALG2	Multiple	NA	NA	NA	NA	NA	NA	NA	NA	NA	NA	NA	NA	NA NA
29880_at	29880	LOC29880	ALG5	B Cell	NA	NA	NA	NA	NA	NA	NA	NA	NA	NA	NA	NA	NA NA
246_at	246	LOC246	ALOX15	Dendritic Cell	NA	NA	NA	NA	NA	NA	NA	NA	NA	NA	NA	NA	NA NA
80216_at	80216	LOC80216	ALPK1	Myeloid	NA	NA	NA	NA	NA	NA	NA	NA	NA	NA	NA	NA	NA NA
10189_at	10189	LOC10189	ALYREF	Multiple	NA	NA	NA	NA	NA	NA	NA	NA	NA	NA	NA	NA	NA NA
120425_at	120425	LOC120425	AMICA1	Myeloid	NA	NA	NA	NA	NA	NA	NA	NA	NA	NA	NA	NA	NA NA
270_at	270	LOC270	AMPD1	B Cell	NA	NA	NA	NA	NA	NA	NA	NA	NA	NA	NA	NA	NA NA
271_at	271	LOC271	AMPD2	Neutrophil	NA	NA	NA	NA	NA	NA	NA	NA	NA	NA	NA	NA	NA NA
272_at	272	LOC272	AMPD3	Myeloid	NA	NA	NA	NA	NA	NA	NA	NA	NA	NA	NA	NA	NA NA
88455_at	88455	LOC88455	ANKRD13A	Multiple	NA	NA	NA	NA	NA	NA	NA	NA	NA	NA	NA	NA	NA NA
23243_at	23243	LOC23243	ANKRD28	Lymphoid	NA	NA	NA	NA	NA	NA	NA	NA	NA	NA	NA	NA	NA NA
91526_at	91526	LOC91526	ANKRD44	Multiple	NA	NA	NA	NA	NA	NA	NA	NA	NA	NA	NA	NA	NA NA
8125_at	8125	LOC8125	ANP32A	Multiple	NA	NA	NA	NA	NA	NA	NA	NA	NA	NA	NA	NA	NA NA
81611_at	81611	LOC81611	ANP32E	Lymphoid	NA	NA	NA	NA	NA	NA	NA	NA	NA	NA	NA	NA	NA NA
8905_at	8905	LOC8905	AP1S2	Monocyte	NA	NA	NA	NA	NA	NA	NA	NA	NA	NA	NA	NA	NA NA
1175_at	1175	LOC1175	AP2S1	Myeloid	NA	NA	NA	NA	NA	NA	NA	NA	NA	NA	NA	NA	NA NA
60489_at	60489	LOC60489	APOBEC3G	Multiple	NA	NA	NA	NA	NA	NA	NA	NA	NA	NA	NA	NA	NA NA
116985_at	116985	LOC116985	ARAP1	Myeloid	NA	NA	NA	NA	NA	NA	NA	NA	NA	NA	NA	NA	NA NA
382_at	382	LOC382	ARF6	Multiple	NA	NA	NA	NA	NA	NA	NA	NA	NA	NA	NA	NA	NA NA
55843_at	55843	LOC55843	ARHGAP15	Multiple	NA	NA	NA	NA	NA	NA	NA	NA	NA	NA	NA	NA	NA NA
93663_at	93663	LOC93663	ARHGAP18	Myeloid	NA	NA	NA	NA	NA	NA	NA	NA	NA	NA	NA	NA	NA NA
58504_at	58504	LOC58504	ARHGAP22	Dendritic Cell	NA	NA	NA	NA	NA	NA	NA	NA	NA	NA	NA	NA	NA NA
9938_at	9938	LOC9938	ARHGAP25	Multiple	NA	NA	NA	NA	NA	NA	NA	NA	NA	NA	NA	NA	NA NA
23092_at	23092	LOC23092	ARHGAP26	Myeloid	NA	NA	NA	NA	NA	NA	NA	NA	NA	NA	NA	NA	NA NA
55701_at	55701	LOC55701	ARHGEF40	Myeloid	NA	NA	NA	NA	NA	NA	NA	NA	NA	NA	NA	NA	NA NA
402_at	402	LOC402	ARL2	Multiple	NA	NA	NA	NA	NA	NA	NA	NA	NA	NA	NA	NA	NA NA
10123_at	10123	LOC10123	ARL4C	Lymphoid	NA	NA	NA	NA	NA	NA	NA	NA	NA	NA	NA	NA	NA NA
151188_at	151188	LOC151188	ARL6IP6	Multiple	NA	NA	NA	NA	NA	NA	NA	NA	NA	NA	NA	NA	NA NA
55207_at	55207	LOC55207	ARL8B	Myeloid	NA	NA	NA	NA	NA	NA	NA	NA	NA	NA	NA	NA	NA NA
56938_at	56938	LOC56938	ARNTL2	Multiple	NA	NA	NA	NA	NA	NA	NA	NA	NA	NA	NA	NA	NA NA
10092_at	10092	LOC10092	ARPC5	Multiple	NA	NA	NA	NA	NA	NA	NA	NA	NA	NA	NA	NA	NA NA
81873_at	81873	LOC81873	ARPC5L	Lymphoid	NA	NA	NA	NA	NA	NA	NA	NA	NA	NA	NA	NA	NA NA
409_at	409	LOC409	ARRB2	Multiple	NA	NA	NA	NA	NA	NA	NA	NA	NA	NA	NA	NA	NA NA
91947_at	91947	LOC91947	ARRDC4	Myeloid	NA	NA	NA	NA	NA	NA	NA	NA	NA	NA	NA	NA	NA NA
50807_at	50807	LOC50807	ASAP1	Monocyte	NA	NA	NA	NA	NA	NA	NA	NA	NA	NA	NA	NA	NA NA
55723_at	55723	LOC55723	ASF1B	Multiple	NA	NA	NA	NA	NA	NA	NA	NA	NA	NA	NA	NA	NA NA
259266_at	259266	LOC259266	ASPM	T Cell	NA	NA	NA	NA	NA	NA	NA	NA	NA	NA	NA	NA	NA NA
171023_at	171023	LOC171023	ASXL1	Lymphoid	NA	NA	NA	NA	NA	NA	NA	NA	NA	NA	NA	NA	NA NA
29028_at	29028	LOC29028	ATAD2	T Cell	NA	NA	NA	NA	NA	NA	NA	NA	NA	NA	NA	NA	NA NA
89849_at	89849	LOC89849	ATG16L2	Myeloid	NA	NA	NA	NA	NA	NA	NA	NA	NA	NA	NA	NA	NA NA
10533_at	10533	LOC10533	ATG7	Myeloid	NA	NA	NA	NA	NA	NA	NA	NA	NA	NA	NA	NA	NA NA
25923_at	25923	LOC25923	ATL3	Multiple	NA	NA	NA	NA	NA	NA	NA	NA	NA	NA	NA	NA	NA NA
472_at	472	LOC472	ATM	Lymphoid	NA	NA	NA	NA	NA	NA	NA	NA	NA	NA	NA	NA	NA NA
79572_at	79572	LOC79572	ATP13A3	Monocyte	NA	NA	NA	NA	NA	NA	NA	NA	NA	NA	NA	NA	NA NA
344905_at	344905	LOC344905	ATP13A5	Multiple	NA	NA	NA	NA	NA	NA	NA	NA	NA	NA	NA	NA	NA NA
490_at	490	LOC490	ATP2B1	Myeloid	NA	NA	NA	NA	NA	NA	NA	NA	NA	NA	NA	NA	NA NA
523_at	523	LOC523	ATP6V1A	Myeloid	NA	NA	NA	NA	NA	NA	NA	NA	NA	NA	NA	NA	NA NA
528_at	528	LOC528	ATP6V1C1	Myeloid	NA	NA	NA	NA	NA	NA	NA	NA	NA	NA	NA	NA	NA NA
6790_at	6790	LOC6790	AURKA	T Cell	NA	NA	NA	NA	NA	NA	NA	NA	NA	NA	NA	NA	NA NA
8703_at	8703	LOC8703	B4GALT3	B Cell	NA	NA	NA	NA	NA	NA	NA	NA	NA	NA	NA	NA	NA NA
571_at	571	LOC571	BACH1	Multiple	NA	NA	NA	NA	NA	NA	NA	NA	NA	NA	NA	NA	NA NA
54971_at	54971	LOC54971	BANP	Myeloid	NA	NA	NA	NA	NA	NA	NA	NA	NA	NA	NA	NA	NA NA
55509_at	55509	LOC55509	BATF3	Multiple	NA	NA	NA	NA	NA	NA	NA	NA	NA	NA	NA	NA	NA NA
11177_at	11177	LOC11177	BAZ1A	Multiple	NA	NA	NA	NA	NA	NA	NA	NA	NA	NA	NA	NA	NA NA
79738_at	79738	LOC79738	BBS10	Multiple	NA	NA	NA	NA	NA	NA	NA	NA	NA	NA	NA	NA	NA NA
53335_at	53335	LOC53335	BCL11A	B Cell	NA	NA	NA	NA	NA	NA	NA	NA	NA	NA	NA	NA	NA NA
64919_at	64919	LOC64919	BCL11B	T Cell	NA	NA	NA	NA	NA	NA	NA	NA	NA	NA	NA	NA	NA NA
596_at	596	LOC596	BCL2	Multiple	NA	NA	NA	NA	NA	NA	NA	NA	NA	NA	NA	NA	NA NA
10018_at	10018	LOC10018	BCL2L11	Multiple	NA	NA	NA	NA	NA	NA	NA	NA	NA	NA	NA	NA	NA NA
604_at	604	LOC604	BCL6	Myeloid	NA	NA	NA	NA	NA	NA	NA	NA	NA	NA	NA	NA	NA NA
8553_at	8553	LOC8553	BHLHE40	Lymphoid	NA	NA	NA	NA	NA	NA	NA	NA	NA	NA	NA	NA	NA NA
79365_at	79365	LOC79365	BHLHE41	Monocyte	NA	NA	NA	NA	NA	NA	NA	NA	NA	NA	NA	NA	NA NA
637_at	637	LOC637	BID	Myeloid	NA	NA	NA	NA	NA	NA	NA	NA	NA	NA	NA	NA	NA NA
640_at	640	LOC640	BLK	B Cell	NA	NA	NA	NA	NA	NA	NA	NA	NA	NA	NA	NA	NA NA
29760_at	29760	LOC29760	BLNK	B Cell	NA	NA	NA	NA	NA	NA	NA	NA	NA	NA	NA	NA	NA NA
282991_at	282991	LOC282991	BLOC1S2	Multiple	NA	NA	NA	NA	NA	NA	NA	NA	NA	NA	NA	NA	NA NA
55330_at	55330	LOC55330	BLOC1S4	Multiple	NA	NA	NA	NA	NA	NA	NA	NA	NA	NA	NA	NA	NA NA
26258_at	26258	LOC26258	BLOC1S6	Dendritic Cell	NA	NA	NA	NA	NA	NA	NA	NA	NA	NA	NA	NA	NA NA
644_at	644	LOC644	BLVRA	Myeloid	NA	NA	NA	NA	NA	NA	NA	NA	NA	NA	NA	NA	NA NA
656_at	656	LOC656	BMP8B	B Cell	NA	NA	NA	NA	NA	NA	NA	NA	NA	NA	NA	NA	NA NA
259282_at	259282	LOC259282	BOD1L1	Multiple	NA	NA	NA	NA	NA	NA	NA	NA	NA	NA	NA	NA	NA NA
2186_at	2186	LOC2186	BPTF	Multiple	NA	NA	NA	NA	NA	NA	NA	NA	NA	NA	NA	NA	NA NA
6046_at	6046	LOC6046	BRD2	Multiple	NA	NA	NA	NA	NA	NA	NA	NA	NA	NA	NA	NA	NA NA
83990_at	83990	LOC83990	BRIP1	Multiple	NA	NA	NA	NA	NA	NA	NA	NA	NA	NA	NA	NA	NA NA
151888_at	151888	LOC151888	BTLA	Lymphoid	NA	NA	NA	NA	NA	NA	NA	NA	NA	NA	NA	NA	NA NA
11118_at	11118	LOC11118	BTN3A2	Lymphoid	NA	NA	NA	NA	NA	NA	NA	NA	NA	NA	NA	NA	NA NA
10384_at	10384	LOC10384	BTN3A3	Lymphoid	NA	NA	NA	NA	NA	NA	NA	NA	NA	NA	NA	NA	NA NA
9184_at	9184	LOC9184	BUB3	Lymphoid	NA	NA	NA	NA	NA	NA	NA	NA	NA	NA	NA	NA	NA NA
64115_at	64115	LOC64115	C10ORF54	Myeloid	NA	NA	NA	NA	NA	NA	NA	NA	NA	NA	NA	NA	NA NA
29125_at	29125	LOC29125	C11ORF21	Multiple	NA	NA	NA	NA	NA	NA	NA	NA	NA	NA	NA	NA	NA NA
57103_at	57103	LOC57103	C12ORF5	Multiple	NA	NA	NA	NA	NA	NA	NA	NA	NA	NA	NA	NA	NA NA
56905_at	56905	LOC56905	C15ORF39	Myeloid	NA	NA	NA	NA	NA	NA	NA	NA	NA	NA	NA	NA	NA NA
79415_at	79415	LOC79415	C17ORF62	Multiple	NA	NA	NA	NA	NA	NA	NA	NA	NA	NA	NA	NA	NA NA
56005_at	56005	LOC56005	C19ORF10	B Cell	NA	NA	NA	NA	NA	NA	NA	NA	NA	NA	NA	NA	NA NA
10438_at	10438	LOC10438	C1D	Multiple	NA	NA	NA	NA	NA	NA	NA	NA	NA	NA	NA	NA	NA NA
128346_at	128346	LOC128346	C1ORF162	Myeloid	NA	NA	NA	NA	NA	NA	NA	NA	NA	NA	NA	NA	NA NA
339541_at	339541	LOC339541	C1ORF228	Multiple	NA	NA	NA	NA	NA	NA	NA	NA	NA	NA	NA	NA	NA NA
708_at	708	LOC708	C1QBP	Lymphoid	NA	NA	NA	NA	NA	NA	NA	NA	NA	NA	NA	NA	NA NA
54149_at	54149	LOC54149	C21ORF91	Multiple	NA	NA	NA	NA	NA	NA	NA	NA	NA	NA	NA	NA	NA NA
285237_at	285237	LOC285237	C3ORF38	Multiple	NA	NA	NA	NA	NA	NA	NA	NA	NA	NA	NA	NA	NA NA
201725_at	201725	LOC201725	C4ORF46	Multiple	NA	NA	NA	NA	NA	NA	NA	NA	NA	NA	NA	NA	NA NA
728_at	728	LOC728	C5AR1	Myeloid	NA	NA	NA	NA	NA	NA	NA	NA	NA	NA	NA	NA	NA NA
140947_at	140947	LOC140947	C5ORF20	Dendritic Cell	NA	NA	NA	NA	NA	NA	NA	NA	NA	NA	NA	NA	NA NA
81688_at	81688	LOC81688	C6ORF62	Multiple	NA	NA	NA	NA	NA	NA	NA	NA	NA	NA	NA	NA	NA NA
203228_at	203228	LOC203228	C9ORF72	Myeloid	NA	NA	NA	NA	NA	NA	NA	NA	NA	NA	NA	NA	NA NA
84270_at	84270	LOC84270	C9ORF89	Multiple	NA	NA	NA	NA	NA	NA	NA	NA	NA	NA	NA	NA	NA NA
51719_at	51719	LOC51719	CAB39	Multiple	NA	NA	NA	NA	NA	NA	NA	NA	NA	NA	NA	NA	NA NA
57118_at	57118	LOC57118	CAMK1D	Myeloid	NA	NA	NA	NA	NA	NA	NA	NA	NA	NA	NA	NA	NA NA
814_at	814	LOC814	CAMK4	T Cell	NA	NA	NA	NA	NA	NA	NA	NA	NA	NA	NA	NA	NA NA
820_at	820	LOC820	CAMP	Multiple	NA	NA	NA	NA	NA	NA	NA	NA	NA	NA	NA	NA	NA NA
821_at	821	LOC821	CANX	Multiple	NA	NA	NA	NA	NA	NA	NA	NA	NA	NA	NA	NA	NA NA
10487_at	10487	LOC10487	CAP1	Multiple	NA	NA	NA	NA	NA	NA	NA	NA	NA	NA	NA	NA	NA NA
822_at	822	LOC822	CAPG	Myeloid	NA	NA	NA	NA	NA	NA	NA	NA	NA	NA	NA	NA	NA NA
84433_at	84433	LOC84433	CARD11	Lymphoid	NA	NA	NA	NA	NA	NA	NA	NA	NA	NA	NA	NA	NA NA
835_at	835	LOC835	CASP2	Multiple	NA	NA	NA	NA	NA	NA	NA	NA	NA	NA	NA	NA	NA NA
867_at	867	LOC867	CBL	Multiple	NA	NA	NA	NA	NA	NA	NA	NA	NA	NA	NA	NA	NA NA
868_at	868	LOC868	CBLB	Lymphoid	NA	NA	NA	NA	NA	NA	NA	NA	NA	NA	NA	NA	NA NA
874_at	874	LOC874	CBR3	Dendritic Cell	NA	NA	NA	NA	NA	NA	NA	NA	NA	NA	NA	NA	NA NA
11335_at	11335	LOC11335	CBX3	Lymphoid	NA	NA	NA	NA	NA	NA	NA	NA	NA	NA	NA	NA	NA NA
23468_at	23468	LOC23468	CBX5	Multiple	NA	NA	NA	NA	NA	NA	NA	NA	NA	NA	NA	NA	NA NA
55749_at	55749	LOC55749	CCAR1	Multiple	NA	NA	NA	NA	NA	NA	NA	NA	NA	NA	NA	NA	NA NA
154467_at	154467	LOC154467	CCDC167	Lymphoid	NA	NA	NA	NA	NA	NA	NA	NA	NA	NA	NA	NA	NA NA
283234_at	283234	LOC283234	CCDC88B	Multiple	NA	NA	NA	NA	NA	NA	NA	NA	NA	NA	NA	NA	NA NA
6346_at	6346	LOC6346	CCL1	Multiple	NA	NA	NA	NA	NA	NA	NA	NA	NA	NA	NA	NA	NA NA
6357_at	6357	LOC6357	CCL13	Dendritic Cell	NA	NA	NA	NA	NA	NA	NA	NA	NA	NA	NA	NA	NA NA
6361_at	6361	LOC6361	CCL17	Dendritic Cell	NA	NA	NA	NA	NA	NA	NA	NA	NA	NA	NA	NA	NA NA
6363_at	6363	LOC6363	CCL19	Myeloid	NA	NA	NA	NA	NA	NA	NA	NA	NA	NA	NA	NA	NA NA
6367_at	6367	LOC6367	CCL22	Myeloid	NA	NA	NA	NA	NA	NA	NA	NA	NA	NA	NA	NA	NA NA
6369_at	6369	LOC6369	CCL24	Monocyte	NA	NA	NA	NA	NA	NA	NA	NA	NA	NA	NA	NA	NA NA
6348_at	6348	LOC6348	CCL3	Multiple	NA	NA	NA	NA	NA	NA	NA	NA	NA	NA	NA	NA	NA NA
6351_at	6351	LOC6351	CCL4	Multiple	NA	NA	NA	NA	NA	NA	NA	NA	NA	NA	NA	NA	NA NA
6355_at	6355	LOC6355	CCL8	Multiple	NA	NA	NA	NA	NA	NA	NA	NA	NA	NA	NA	NA	NA NA
890_at	890	LOC890	CCNA2	T Cell	NA	NA	NA	NA	NA	NA	NA	NA	NA	NA	NA	NA	NA NA
891_at	891	LOC891	CCNB1	T Cell	NA	NA	NA	NA	NA	NA	NA	NA	NA	NA	NA	NA	NA NA
9133_at	9133	LOC9133	CCNB2	T Cell	NA	NA	NA	NA	NA	NA	NA	NA	NA	NA	NA	NA	NA NA
894_at	894	LOC894	CCND2	Lymphoid	NA	NA	NA	NA	NA	NA	NA	NA	NA	NA	NA	NA	NA NA
219771_at	219771	LOC219771	CCNY	Multiple	NA	NA	NA	NA	NA	NA	NA	NA	NA	NA	NA	NA	NA NA
151195_at	151195	LOC151195	CCNYL1	Myeloid	NA	NA	NA	NA	NA	NA	NA	NA	NA	NA	NA	NA	NA NA
1230_at	1230	LOC1230	CCR1	Multiple	NA	NA	NA	NA	NA	NA	NA	NA	NA	NA	NA	NA	NA NA
1232_at	1232	LOC1232	CCR3	Neutrophil	NA	NA	NA	NA	NA	NA	NA	NA	NA	NA	NA	NA	NA NA
1234_at	1234	LOC1234	CCR5	Multiple	NA	NA	NA	NA	NA	NA	NA	NA	NA	NA	NA	NA	NA NA
1236_at	1236	LOC1236	CCR7	Multiple	NA	NA	NA	NA	NA	NA	NA	NA	NA	NA	NA	NA	NA NA
10576_at	10576	LOC10576	CCT2	Multiple	NA	NA	NA	NA	NA	NA	NA	NA	NA	NA	NA	NA	NA NA
11126_at	11126	LOC11126	CD160	Lymphoid	NA	NA	NA	NA	NA	NA	NA	NA	NA	NA	NA	NA	NA NA
8763_at	8763	LOC8763	CD164	Multiple	NA	NA	NA	NA	NA	NA	NA	NA	NA	NA	NA	NA	NA NA
930_at	930	LOC930	CD19	B Cell	NA	NA	NA	NA	NA	NA	NA	NA	NA	NA	NA	NA	NA NA
909_at	909	LOC909	CD1A	Dendritic Cell	NA	NA	NA	NA	NA	NA	NA	NA	NA	NA	NA	NA	NA NA
910_at	910	LOC910	CD1B	Dendritic Cell	NA	NA	NA	NA	NA	NA	NA	NA	NA	NA	NA	NA	NA NA
911_at	911	LOC911	CD1C	Multiple	NA	NA	NA	NA	NA	NA	NA	NA	NA	NA	NA	NA	NA NA
912_at	912	LOC912	CD1D	Monocyte	NA	NA	NA	NA	NA	NA	NA	NA	NA	NA	NA	NA	NA NA
913_at	913	LOC913	CD1E	Dendritic Cell	NA	NA	NA	NA	NA	NA	NA	NA	NA	NA	NA	NA	NA NA
11314_at	11314	LOC11314	CD300A	Multiple	NA	NA	NA	NA	NA	NA	NA	NA	NA	NA	NA	NA	NA NA
951_at	951	LOC951	CD37	Multiple	NA	NA	NA	NA	NA	NA	NA	NA	NA	NA	NA	NA	NA NA
960_at	960	LOC960	CD44	Multiple	NA	NA	NA	NA	NA	NA	NA	NA	NA	NA	NA	NA	NA NA
962_at	962	LOC962	CD48	Multiple	NA	NA	NA	NA	NA	NA	NA	NA	NA	NA	NA	NA	NA NA
921_at	921	LOC921	CD5	T Cell	NA	NA	NA	NA	NA	NA	NA	NA	NA	NA	NA	NA	NA NA
1043_at	1043	LOC1043	CD52	Multiple	NA	NA	NA	NA	NA	NA	NA	NA	NA	NA	NA	NA	NA NA
963_at	963	LOC963	CD53	Multiple	NA	NA	NA	NA	NA	NA	NA	NA	NA	NA	NA	NA	NA NA
1604_at	1604	LOC1604	CD55	Multiple	NA	NA	NA	NA	NA	NA	NA	NA	NA	NA	NA	NA	NA NA
965_at	965	LOC965	CD58	Myeloid	NA	NA	NA	NA	NA	NA	NA	NA	NA	NA	NA	NA	NA NA
924_at	924	LOC924	CD7	Lymphoid	NA	NA	NA	NA	NA	NA	NA	NA	NA	NA	NA	NA	NA NA
973_at	973	LOC973	CD79A	B Cell	NA	NA	NA	NA	NA	NA	NA	NA	NA	NA	NA	NA	NA NA
974_at	974	LOC974	CD79B	B Cell	NA	NA	NA	NA	NA	NA	NA	NA	NA	NA	NA	NA	NA NA
941_at	941	LOC941	CD80	Myeloid	NA	NA	NA	NA	NA	NA	NA	NA	NA	NA	NA	NA	NA NA
3732_at	3732	LOC3732	CD82	Multiple	NA	NA	NA	NA	NA	NA	NA	NA	NA	NA	NA	NA	NA NA
9308_at	9308	LOC9308	CD83	Multiple	NA	NA	NA	NA	NA	NA	NA	NA	NA	NA	NA	NA	NA NA
8832_at	8832	LOC8832	CD84	Multiple	NA	NA	NA	NA	NA	NA	NA	NA	NA	NA	NA	NA	NA NA
976_at	976	LOC976	CD97	Multiple	NA	NA	NA	NA	NA	NA	NA	NA	NA	NA	NA	NA	NA NA
978_at	978	LOC978	CDA	Neutrophil	NA	NA	NA	NA	NA	NA	NA	NA	NA	NA	NA	NA	NA NA
994_at	994	LOC994	CDC25B	Lymphoid	NA	NA	NA	NA	NA	NA	NA	NA	NA	NA	NA	NA	NA NA
998_at	998	LOC998	CDC42	Multiple	NA	NA	NA	NA	NA	NA	NA	NA	NA	NA	NA	NA	NA NA
56882_at	56882	LOC56882	CDC42SE1	Multiple	NA	NA	NA	NA	NA	NA	NA	NA	NA	NA	NA	NA	NA NA
56990_at	56990	LOC56990	CDC42SE2	Multiple	NA	NA	NA	NA	NA	NA	NA	NA	NA	NA	NA	NA	NA NA
988_at	988	LOC988	CDC5L	Multiple	NA	NA	NA	NA	NA	NA	NA	NA	NA	NA	NA	NA	NA NA
157313_at	157313	LOC157313	CDCA2	T Cell	NA	NA	NA	NA	NA	NA	NA	NA	NA	NA	NA	NA	NA NA
113130_at	113130	LOC113130	CDCA5	T Cell	NA	NA	NA	NA	NA	NA	NA	NA	NA	NA	NA	NA	NA NA
983_at	983	LOC983	CDK1	T Cell	NA	NA	NA	NA	NA	NA	NA	NA	NA	NA	NA	NA	NA NA
55755_at	55755	LOC55755	CDK5RAP2	Monocyte	NA	NA	NA	NA	NA	NA	NA	NA	NA	NA	NA	NA	NA NA
1021_at	1021	LOC1021	CDK6	Lymphoid	NA	NA	NA	NA	NA	NA	NA	NA	NA	NA	NA	NA	NA NA
1032_at	1032	LOC1032	CDKN2D	Multiple	NA	NA	NA	NA	NA	NA	NA	NA	NA	NA	NA	NA	NA NA
81620_at	81620	LOC81620	CDT1	Lymphoid	NA	NA	NA	NA	NA	NA	NA	NA	NA	NA	NA	NA	NA NA
55573_at	55573	LOC55573	CDV3	Multiple	NA	NA	NA	NA	NA	NA	NA	NA	NA	NA	NA	NA	NA NA
51816_at	51816	LOC51816	CECR1	Multiple	NA	NA	NA	NA	NA	NA	NA	NA	NA	NA	NA	NA	NA NA
10659_at	10659	LOC10659	CELF2	Multiple	NA	NA	NA	NA	NA	NA	NA	NA	NA	NA	NA	NA	NA NA
64946_at	64946	LOC64946	CENPH	Lymphoid	NA	NA	NA	NA	NA	NA	NA	NA	NA	NA	NA	NA	NA NA
64105_at	64105	LOC64105	CENPK	Lymphoid	NA	NA	NA	NA	NA	NA	NA	NA	NA	NA	NA	NA	NA NA
79682_at	79682	LOC79682	CENPU	Lymphoid	NA	NA	NA	NA	NA	NA	NA	NA	NA	NA	NA	NA	NA NA
22995_at	22995	LOC22995	CEP152	Multiple	NA	NA	NA	NA	NA	NA	NA	NA	NA	NA	NA	NA	NA NA
9859_at	9859	LOC9859	CEP170	Myeloid	NA	NA	NA	NA	NA	NA	NA	NA	NA	NA	NA	NA	NA NA
84984_at	84984	LOC84984	CEP19	Neutrophil	NA	NA	NA	NA	NA	NA	NA	NA	NA	NA	NA	NA	NA NA
84131_at	84131	LOC84131	CEP78	Lymphoid	NA	NA	NA	NA	NA	NA	NA	NA	NA	NA	NA	NA	NA NA
253782_at	253782	LOC253782	CERS6	Dendritic Cell	NA	NA	NA	NA	NA	NA	NA	NA	NA	NA	NA	NA	NA NA
8837_at	8837	LOC8837	CFLAR	Multiple	NA	NA	NA	NA	NA	NA	NA	NA	NA	NA	NA	NA	NA NA
5199_at	5199	LOC5199	CFP	Myeloid	NA	NA	NA	NA	NA	NA	NA	NA	NA	NA	NA	NA	NA NA
1111_at	1111	LOC1111	CHEK1	Lymphoid	NA	NA	NA	NA	NA	NA	NA	NA	NA	NA	NA	NA	NA NA
1116_at	1116	LOC1116	CHI3L1	Myeloid	NA	NA	NA	NA	NA	NA	NA	NA	NA	NA	NA	NA	NA NA
26973_at	26973	LOC26973	CHORDC1	Multiple	NA	NA	NA	NA	NA	NA	NA	NA	NA	NA	NA	NA	NA NA
55501_at	55501	LOC55501	CHST12	NK Cell	NA	NA	NA	NA	NA	NA	NA	NA	NA	NA	NA	NA	NA NA
9435_at	9435	LOC9435	CHST2	Multiple	NA	NA	NA	NA	NA	NA	NA	NA	NA	NA	NA	NA	NA NA
56548_at	56548	LOC56548	CHST7	Dendritic Cell	NA	NA	NA	NA	NA	NA	NA	NA	NA	NA	NA	NA	NA NA
1154_at	1154	LOC1154	CISH	Lymphoid	NA	NA	NA	NA	NA	NA	NA	NA	NA	NA	NA	NA	NA NA
10970_at	10970	LOC10970	CKAP4	Multiple	NA	NA	NA	NA	NA	NA	NA	NA	NA	NA	NA	NA	NA NA
1164_at	1164	LOC1164	CKS2	Lymphoid	NA	NA	NA	NA	NA	NA	NA	NA	NA	NA	NA	NA	NA NA
1178_at	1178	LOC1178	CLC	Neutrophil	NA	NA	NA	NA	NA	NA	NA	NA	NA	NA	NA	NA	NA NA
10462_at	10462	LOC10462	CLEC10A	Dendritic Cell	NA	NA	NA	NA	NA	NA	NA	NA	NA	NA	NA	NA	NA NA
29121_at	29121	LOC29121	CLEC2D	Multiple	NA	NA	NA	NA	NA	NA	NA	NA	NA	NA	NA	NA	NA NA
50856_at	50856	LOC50856	CLEC4A	Myeloid	NA	NA	NA	NA	NA	NA	NA	NA	NA	NA	NA	NA	NA NA
26253_at	26253	LOC26253	CLEC4E	Myeloid	NA	NA	NA	NA	NA	NA	NA	NA	NA	NA	NA	NA	NA NA
64581_at	64581	LOC64581	CLEC7A	Myeloid	NA	NA	NA	NA	NA	NA	NA	NA	NA	NA	NA	NA	NA NA
160365_at	160365	LOC160365	CLECL1	Multiple	NA	NA	NA	NA	NA	NA	NA	NA	NA	NA	NA	NA	NA NA
1193_at	1193	LOC1193	CLIC2	Dendritic Cell	NA	NA	NA	NA	NA	NA	NA	NA	NA	NA	NA	NA	NA NA
9022_at	9022	LOC9022	CLIC3	NK Cell	NA	NA	NA	NA	NA	NA	NA	NA	NA	NA	NA	NA	NA NA
2055_at	2055	LOC2055	CLN8	Myeloid	NA	NA	NA	NA	NA	NA	NA	NA	NA	NA	NA	NA	NA NA
152100_at	152100	LOC152100	CMC1	Lymphoid	NA	NA	NA	NA	NA	NA	NA	NA	NA	NA	NA	NA	NA NA
146225_at	146225	LOC146225	CMTM2	Neutrophil	NA	NA	NA	NA	NA	NA	NA	NA	NA	NA	NA	NA	NA NA
152189_at	152189	LOC152189	CMTM8	Multiple	NA	NA	NA	NA	NA	NA	NA	NA	NA	NA	NA	NA	NA NA
25904_at	25904	LOC25904	CNOT10	Dendritic Cell	NA	NA	NA	NA	NA	NA	NA	NA	NA	NA	NA	NA	NA NA
246175_at	246175	LOC246175	CNOT6L	Multiple	NA	NA	NA	NA	NA	NA	NA	NA	NA	NA	NA	NA	NA NA
10087_at	10087	LOC10087	COL4A3BP	Myeloid	NA	NA	NA	NA	NA	NA	NA	NA	NA	NA	NA	NA	NA NA
79709_at	79709	LOC79709	COLGALT1	Myeloid	NA	NA	NA	NA	NA	NA	NA	NA	NA	NA	NA	NA	NA NA
51122_at	51122	LOC51122	COMMD2	Multiple	NA	NA	NA	NA	NA	NA	NA	NA	NA	NA	NA	NA	NA NA
11151_at	11151	LOC11151	CORO1A	Multiple	NA	NA	NA	NA	NA	NA	NA	NA	NA	NA	NA	NA	NA NA
23603_at	23603	LOC23603	CORO1C	Myeloid	NA	NA	NA	NA	NA	NA	NA	NA	NA	NA	NA	NA	NA NA
23406_at	23406	LOC23406	COTL1	Multiple	NA	NA	NA	NA	NA	NA	NA	NA	NA	NA	NA	NA	NA NA
57699_at	57699	LOC57699	CPNE5	B Cell	NA	NA	NA	NA	NA	NA	NA	NA	NA	NA	NA	NA	NA NA
1371_at	1371	LOC1371	CPOX	T Cell	NA	NA	NA	NA	NA	NA	NA	NA	NA	NA	NA	NA	NA NA
55313_at	55313	LOC55313	CPPED1	Myeloid	NA	NA	NA	NA	NA	NA	NA	NA	NA	NA	NA	NA	NA NA
54504_at	54504	LOC54504	CPVL	Myeloid	NA	NA	NA	NA	NA	NA	NA	NA	NA	NA	NA	NA	NA NA
1379_at	1379	LOC1379	CR1L	Multiple	NA	NA	NA	NA	NA	NA	NA	NA	NA	NA	NA	NA	NA NA
1385_at	1385	LOC1385	CREB1	Multiple	NA	NA	NA	NA	NA	NA	NA	NA	NA	NA	NA	NA	NA NA
153222_at	153222	LOC153222	CREBRF	Myeloid	NA	NA	NA	NA	NA	NA	NA	NA	NA	NA	NA	NA	NA NA
8804_at	8804	LOC8804	CREG1	Myeloid	NA	NA	NA	NA	NA	NA	NA	NA	NA	NA	NA	NA	NA NA
64109_at	64109	LOC64109	CRLF2	Dendritic Cell	NA	NA	NA	NA	NA	NA	NA	NA	NA	NA	NA	NA	NA NA
51379_at	51379	LOC51379	CRLF3	Multiple	NA	NA	NA	NA	NA	NA	NA	NA	NA	NA	NA	NA	NA NA
56253_at	56253	LOC56253	CRTAM	Multiple	NA	NA	NA	NA	NA	NA	NA	NA	NA	NA	NA	NA	NA NA
1436_at	1436	LOC1436	CSF1R	Myeloid	NA	NA	NA	NA	NA	NA	NA	NA	NA	NA	NA	NA	NA NA
1437_at	1437	LOC1437	CSF2	Multiple	NA	NA	NA	NA	NA	NA	NA	NA	NA	NA	NA	NA	NA NA
1438_at	1438	LOC1438	CSF2RA	Myeloid	NA	NA	NA	NA	NA	NA	NA	NA	NA	NA	NA	NA	NA NA
55454_at	55454	LOC55454	CSGALNACT2	Multiple	NA	NA	NA	NA	NA	NA	NA	NA	NA	NA	NA	NA	NA NA
1445_at	1445	LOC1445	CSK	Multiple	NA	NA	NA	NA	NA	NA	NA	NA	NA	NA	NA	NA	NA NA
53944_at	53944	LOC53944	CSNK1G1	Multiple	NA	NA	NA	NA	NA	NA	NA	NA	NA	NA	NA	NA	NA NA
1475_at	1475	LOC1475	CSTA	Myeloid	NA	NA	NA	NA	NA	NA	NA	NA	NA	NA	NA	NA	NA NA
1486_at	1486	LOC1486	CTBS	Neutrophil	NA	NA	NA	NA	NA	NA	NA	NA	NA	NA	NA	NA	NA NA
1493_at	1493	LOC1493	CTLA4	T Cell	NA	NA	NA	NA	NA	NA	NA	NA	NA	NA	NA	NA	NA NA
1508_at	1508	LOC1508	CTSB	Myeloid	NA	NA	NA	NA	NA	NA	NA	NA	NA	NA	NA	NA	NA NA
1075_at	1075	LOC1075	CTSC	Multiple	NA	NA	NA	NA	NA	NA	NA	NA	NA	NA	NA	NA	NA NA
1509_at	1509	LOC1509	CTSD	Monocyte	NA	NA	NA	NA	NA	NA	NA	NA	NA	NA	NA	NA	NA NA
1514_at	1514	LOC1514	CTSL	Monocyte	NA	NA	NA	NA	NA	NA	NA	NA	NA	NA	NA	NA	NA NA
1520_at	1520	LOC1520	CTSS	Multiple	NA	NA	NA	NA	NA	NA	NA	NA	NA	NA	NA	NA	NA NA
8454_at	8454	LOC8454	CUL1	Multiple	NA	NA	NA	NA	NA	NA	NA	NA	NA	NA	NA	NA	NA NA
55280_at	55280	LOC55280	CWF19L1	Multiple	NA	NA	NA	NA	NA	NA	NA	NA	NA	NA	NA	NA	NA NA
1524_at	1524	LOC1524	CX3CR1	Multiple	NA	NA	NA	NA	NA	NA	NA	NA	NA	NA	NA	NA	NA NA
3577_at	3577	LOC3577	CXCR1	Neutrophil	NA	NA	NA	NA	NA	NA	NA	NA	NA	NA	NA	NA	NA NA
3579_at	3579	LOC3579	CXCR2	Neutrophil	NA	NA	NA	NA	NA	NA	NA	NA	NA	NA	NA	NA	NA NA
643_at	643	LOC643	CXCR5	B Cell	NA	NA	NA	NA	NA	NA	NA	NA	NA	NA	NA	NA	NA NA
159013_at	159013	LOC159013	CXORF38	Multiple	NA	NA	NA	NA	NA	NA	NA	NA	NA	NA	NA	NA	NA NA
91966_at	91966	LOC91966	CXORF40A	Multiple	NA	NA	NA	NA	NA	NA	NA	NA	NA	NA	NA	NA	NA NA
1535_at	1535	LOC1535	CYBA	Multiple	NA	NA	NA	NA	NA	NA	NA	NA	NA	NA	NA	NA	NA NA
1536_at	1536	LOC1536	CYBB	Monocyte	NA	NA	NA	NA	NA	NA	NA	NA	NA	NA	NA	NA	NA NA
1545_at	1545	LOC1545	CYP1B1	Myeloid	NA	NA	NA	NA	NA	NA	NA	NA	NA	NA	NA	NA	NA NA
10800_at	10800	LOC10800	CYSLTR1	Multiple	NA	NA	NA	NA	NA	NA	NA	NA	NA	NA	NA	NA	NA NA
9267_at	9267	LOC9267	CYTH1	Multiple	NA	NA	NA	NA	NA	NA	NA	NA	NA	NA	NA	NA	NA NA
27128_at	27128	LOC27128	CYTH4	Multiple	NA	NA	NA	NA	NA	NA	NA	NA	NA	NA	NA	NA	NA NA
9595_at	9595	LOC9595	CYTIP	Multiple	NA	NA	NA	NA	NA	NA	NA	NA	NA	NA	NA	NA	NA NA
27071_at	27071	LOC27071	DAPP1	Myeloid	NA	NA	NA	NA	NA	NA	NA	NA	NA	NA	NA	NA	NA NA
25879_at	25879	LOC25879	DCAF13	Lymphoid	NA	NA	NA	NA	NA	NA	NA	NA	NA	NA	NA	NA	NA NA
81501_at	81501	LOC81501	DCSTAMP	Myeloid	NA	NA	NA	NA	NA	NA	NA	NA	NA	NA	NA	NA	NA NA
54165_at	54165	LOC54165	DCUN1D1	Multiple	NA	NA	NA	NA	NA	NA	NA	NA	NA	NA	NA	NA	NA NA
80821_at	80821	LOC80821	DDHD1	Multiple	NA	NA	NA	NA	NA	NA	NA	NA	NA	NA	NA	NA	NA NA
1650_at	1650	LOC1650	DDOST	B Cell	NA	NA	NA	NA	NA	NA	NA	NA	NA	NA	NA	NA	NA NA
10521_at	10521	LOC10521	DDX17	Multiple	NA	NA	NA	NA	NA	NA	NA	NA	NA	NA	NA	NA	NA NA
9188_at	9188	LOC9188	DDX21	Lymphoid	NA	NA	NA	NA	NA	NA	NA	NA	NA	NA	NA	NA	NA NA
10212_at	10212	LOC10212	DDX39A	Multiple	NA	NA	NA	NA	NA	NA	NA	NA	NA	NA	NA	NA	NA NA
51428_at	51428	LOC51428	DDX41	Myeloid	NA	NA	NA	NA	NA	NA	NA	NA	NA	NA	NA	NA	NA NA
91351_at	91351	LOC91351	DDX60L	Myeloid	NA	NA	NA	NA	NA	NA	NA	NA	NA	NA	NA	NA	NA NA
162989_at	162989	LOC162989	DEDD2	Multiple	NA	NA	NA	NA	NA	NA	NA	NA	NA	NA	NA	NA	NA NA
50619_at	50619	LOC50619	DEF6	Multiple	NA	NA	NA	NA	NA	NA	NA	NA	NA	NA	NA	NA	NA NA
1669_at	1669	LOC1669	DEFA4	Lymphoid	NA	NA	NA	NA	NA	NA	NA	NA	NA	NA	NA	NA	NA NA
163486_at	163486	LOC163486	DENND1B	Multiple	NA	NA	NA	NA	NA	NA	NA	NA	NA	NA	NA	NA	NA NA
79961_at	79961	LOC79961	DENND2D	Lymphoid	NA	NA	NA	NA	NA	NA	NA	NA	NA	NA	NA	NA	NA NA
55667_at	55667	LOC55667	DENND4C	Myeloid	NA	NA	NA	NA	NA	NA	NA	NA	NA	NA	NA	NA	NA NA
8562_at	8562	LOC8562	DENR	Multiple	NA	NA	NA	NA	NA	NA	NA	NA	NA	NA	NA	NA	NA NA
55635_at	55635	LOC55635	DEPDC1	T Cell	NA	NA	NA	NA	NA	NA	NA	NA	NA	NA	NA	NA	NA NA
79139_at	79139	LOC79139	DERL1	Lymphoid	NA	NA	NA	NA	NA	NA	NA	NA	NA	NA	NA	NA	NA NA
91319_at	91319	LOC91319	DERL3	B Cell	NA	NA	NA	NA	NA	NA	NA	NA	NA	NA	NA	NA	NA NA
1687_at	1687	LOC1687	DFNA5	Monocyte	NA	NA	NA	NA	NA	NA	NA	NA	NA	NA	NA	NA	NA NA
1606_at	1606	LOC1606	DGKA	T Cell	NA	NA	NA	NA	NA	NA	NA	NA	NA	NA	NA	NA	NA NA
56919_at	56919	LOC56919	DHX33	T Cell	NA	NA	NA	NA	NA	NA	NA	NA	NA	NA	NA	NA	NA NA
170506_at	170506	LOC170506	DHX36	Multiple	NA	NA	NA	NA	NA	NA	NA	NA	NA	NA	NA	NA	NA NA
23181_at	23181	LOC23181	DIP2A	Lymphoid	NA	NA	NA	NA	NA	NA	NA	NA	NA	NA	NA	NA	NA NA
84925_at	84925	LOC84925	DIRC2	Myeloid	NA	NA	NA	NA	NA	NA	NA	NA	NA	NA	NA	NA	NA NA
1736_at	1736	LOC1736	DKC1	Lymphoid	NA	NA	NA	NA	NA	NA	NA	NA	NA	NA	NA	NA	NA NA
55567_at	55567	LOC55567	DNAH3	Multiple	NA	NA	NA	NA	NA	NA	NA	NA	NA	NA	NA	NA	NA NA
3337_at	3337	LOC3337	DNAJB1	T Cell	NA	NA	NA	NA	NA	NA	NA	NA	NA	NA	NA	NA	NA NA
79982_at	79982	LOC79982	DNAJB14	Multiple	NA	NA	NA	NA	NA	NA	NA	NA	NA	NA	NA	NA	NA NA
64215_at	64215	LOC64215	DNAJC1	Lymphoid	NA	NA	NA	NA	NA	NA	NA	NA	NA	NA	NA	NA	NA NA
85406_at	85406	LOC85406	DNAJC14	Multiple	NA	NA	NA	NA	NA	NA	NA	NA	NA	NA	NA	NA	NA NA
5611_at	5611	LOC5611	DNAJC3	Multiple	NA	NA	NA	NA	NA	NA	NA	NA	NA	NA	NA	NA	NA NA
85479_at	85479	LOC85479	DNAJC5B	Monocyte	NA	NA	NA	NA	NA	NA	NA	NA	NA	NA	NA	NA	NA NA
1786_at	1786	LOC1786	DNMT1	Multiple	NA	NA	NA	NA	NA	NA	NA	NA	NA	NA	NA	NA	NA NA
30836_at	30836	LOC30836	DNTTIP2	Multiple	NA	NA	NA	NA	NA	NA	NA	NA	NA	NA	NA	NA	NA NA
55619_at	55619	LOC55619	DOCK10	Multiple	NA	NA	NA	NA	NA	NA	NA	NA	NA	NA	NA	NA	NA NA
1794_at	1794	LOC1794	DOCK2	Multiple	NA	NA	NA	NA	NA	NA	NA	NA	NA	NA	NA	NA	NA NA
80005_at	80005	LOC80005	DOCK5	Myeloid	NA	NA	NA	NA	NA	NA	NA	NA	NA	NA	NA	NA	NA NA
81704_at	81704	LOC81704	DOCK8	Multiple	NA	NA	NA	NA	NA	NA	NA	NA	NA	NA	NA	NA	NA NA
64174_at	64174	LOC64174	DPEP2	Myeloid	NA	NA	NA	NA	NA	NA	NA	NA	NA	NA	NA	NA	NA NA
285381_at	285381	LOC285381	DPH3	Multiple	NA	NA	NA	NA	NA	NA	NA	NA	NA	NA	NA	NA	NA NA
1806_at	1806	LOC1806	DPYD	Myeloid	NA	NA	NA	NA	NA	NA	NA	NA	NA	NA	NA	NA	NA NA
29940_at	29940	LOC29940	DSE	Myeloid	NA	NA	NA	NA	NA	NA	NA	NA	NA	NA	NA	NA	NA NA
51514_at	51514	LOC51514	DTL	Lymphoid	NA	NA	NA	NA	NA	NA	NA	NA	NA	NA	NA	NA	NA NA
1838_at	1838	LOC1838	DTNB	B Cell	NA	NA	NA	NA	NA	NA	NA	NA	NA	NA	NA	NA	NA NA
151636_at	151636	LOC151636	DTX3L	Multiple	NA	NA	NA	NA	NA	NA	NA	NA	NA	NA	NA	NA	NA NA
1844_at	1844	LOC1844	DUSP2	T Cell	NA	NA	NA	NA	NA	NA	NA	NA	NA	NA	NA	NA	NA NA
1846_at	1846	LOC1846	DUSP4	T Cell	NA	NA	NA	NA	NA	NA	NA	NA	NA	NA	NA	NA	NA NA
1847_at	1847	LOC1847	DUSP5	Multiple	NA	NA	NA	NA	NA	NA	NA	NA	NA	NA	NA	NA	NA NA
1848_at	1848	LOC1848	DUSP6	Monocyte	NA	NA	NA	NA	NA	NA	NA	NA	NA	NA	NA	NA	NA NA
1778_at	1778	LOC1778	DYNC1H1	Multiple	NA	NA	NA	NA	NA	NA	NA	NA	NA	NA	NA	NA	NA NA
8445_at	8445	LOC8445	DYRK2	Multiple	NA	NA	NA	NA	NA	NA	NA	NA	NA	NA	NA	NA	NA NA
85403_at	85403	LOC85403	EAF1	Multiple	NA	NA	NA	NA	NA	NA	NA	NA	NA	NA	NA	NA	NA NA
55840_at	55840	LOC55840	EAF2	B Cell	NA	NA	NA	NA	NA	NA	NA	NA	NA	NA	NA	NA	NA NA
10148_at	10148	LOC10148	EBI3	Myeloid	NA	NA	NA	NA	NA	NA	NA	NA	NA	NA	NA	NA	NA NA
55741_at	55741	LOC55741	EDEM2	B Cell	NA	NA	NA	NA	NA	NA	NA	NA	NA	NA	NA	NA	NA NA
80267_at	80267	LOC80267	EDEM3	Multiple	NA	NA	NA	NA	NA	NA	NA	NA	NA	NA	NA	NA	NA NA
8726_at	8726	LOC8726	EED	Multiple	NA	NA	NA	NA	NA	NA	NA	NA	NA	NA	NA	NA	NA NA
9343_at	9343	LOC9343	EFTUD2	Multiple	NA	NA	NA	NA	NA	NA	NA	NA	NA	NA	NA	NA	NA NA
30844_at	30844	LOC30844	EHD4	Dendritic Cell	NA	NA	NA	NA	NA	NA	NA	NA	NA	NA	NA	NA	NA NA
10209_at	10209	LOC10209	EIF1	Multiple	NA	NA	NA	NA	NA	NA	NA	NA	NA	NA	NA	NA	NA NA
9451_at	9451	LOC9451	EIF2AK3	B Cell	NA	NA	NA	NA	NA	NA	NA	NA	NA	NA	NA	NA	NA NA
1968_at	1968	LOC1968	EIF2S3	Multiple	NA	NA	NA	NA	NA	NA	NA	NA	NA	NA	NA	NA	NA NA
1983_at	1983	LOC1983	EIF5	Multiple	NA	NA	NA	NA	NA	NA	NA	NA	NA	NA	NA	NA	NA NA
1984_at	1984	LOC1984	EIF5A	Multiple	NA	NA	NA	NA	NA	NA	NA	NA	NA	NA	NA	NA	NA NA
9669_at	9669	LOC9669	EIF5B	Multiple	NA	NA	NA	NA	NA	NA	NA	NA	NA	NA	NA	NA	NA NA
2000_at	2000	LOC2000	ELF4	Multiple	NA	NA	NA	NA	NA	NA	NA	NA	NA	NA	NA	NA	NA NA
146956_at	146956	LOC146956	EME1	B Cell	NA	NA	NA	NA	NA	NA	NA	NA	NA	NA	NA	NA	NA NA
84034_at	84034	LOC84034	EMILIN2	Myeloid	NA	NA	NA	NA	NA	NA	NA	NA	NA	NA	NA	NA	NA NA
30817_at	30817	LOC30817	EMR2	Myeloid	NA	NA	NA	NA	NA	NA	NA	NA	NA	NA	NA	NA	NA NA
2023_at	2023	LOC2023	ENO1	Multiple	NA	NA	NA	NA	NA	NA	NA	NA	NA	NA	NA	NA	NA NA
953_at	953	LOC953	ENTPD1	Multiple	NA	NA	NA	NA	NA	NA	NA	NA	NA	NA	NA	NA	NA NA
80314_at	80314	LOC80314	EPC1	Lymphoid	NA	NA	NA	NA	NA	NA	NA	NA	NA	NA	NA	NA	NA NA
2069_at	2069	LOC2069	EREG	Monocyte	NA	NA	NA	NA	NA	NA	NA	NA	NA	NA	NA	NA	NA NA
90459_at	90459	LOC90459	ERI1	Lymphoid	NA	NA	NA	NA	NA	NA	NA	NA	NA	NA	NA	NA	NA NA
2081_at	2081	LOC2081	ERN1	B Cell	NA	NA	NA	NA	NA	NA	NA	NA	NA	NA	NA	NA	NA NA
2117_at	2117	LOC2117	ETV3	Myeloid	NA	NA	NA	NA	NA	NA	NA	NA	NA	NA	NA	NA	NA NA
2120_at	2120	LOC2120	ETV6	Myeloid	NA	NA	NA	NA	NA	NA	NA	NA	NA	NA	NA	NA	NA NA
2123_at	2123	LOC2123	EVI2A	Multiple	NA	NA	NA	NA	NA	NA	NA	NA	NA	NA	NA	NA	NA NA
51466_at	51466	LOC51466	EVL	Multiple	NA	NA	NA	NA	NA	NA	NA	NA	NA	NA	NA	NA	NA NA
51010_at	51010	LOC51010	EXOSC3	Multiple	NA	NA	NA	NA	NA	NA	NA	NA	NA	NA	NA	NA	NA NA
7430_at	7430	LOC7430	EZR	B Cell	NA	NA	NA	NA	NA	NA	NA	NA	NA	NA	NA	NA	NA NA
9214_at	9214	LOC9214	FAIM3	Lymphoid	NA	NA	NA	NA	NA	NA	NA	NA	NA	NA	NA	NA	NA NA
359845_at	359845	LOC359845	FAM101B	Multiple	NA	NA	NA	NA	NA	NA	NA	NA	NA	NA	NA	NA	NA NA
116496_at	116496	LOC116496	FAM129A	Myeloid	NA	NA	NA	NA	NA	NA	NA	NA	NA	NA	NA	NA	NA NA
199786_at	199786	LOC199786	FAM129C	B Cell	NA	NA	NA	NA	NA	NA	NA	NA	NA	NA	NA	NA	NA NA
54855_at	54855	LOC54855	FAM46C	B Cell	NA	NA	NA	NA	NA	NA	NA	NA	NA	NA	NA	NA	NA NA
81553_at	81553	LOC81553	FAM49A	Myeloid	NA	NA	NA	NA	NA	NA	NA	NA	NA	NA	NA	NA	NA NA
51571_at	51571	LOC51571	FAM49B	Multiple	NA	NA	NA	NA	NA	NA	NA	NA	NA	NA	NA	NA	NA NA
51307_at	51307	LOC51307	FAM53C	Neutrophil	NA	NA	NA	NA	NA	NA	NA	NA	NA	NA	NA	NA	NA NA
9750_at	9750	LOC9750	FAM65B	Multiple	NA	NA	NA	NA	NA	NA	NA	NA	NA	NA	NA	NA	NA NA
2177_at	2177	LOC2177	FANCD2	Lymphoid	NA	NA	NA	NA	NA	NA	NA	NA	NA	NA	NA	NA	NA NA
356_at	356	LOC356	FASLG	Lymphoid	NA	NA	NA	NA	NA	NA	NA	NA	NA	NA	NA	NA	NA NA
84893_at	84893	LOC84893	FBXO18	B Cell	NA	NA	NA	NA	NA	NA	NA	NA	NA	NA	NA	NA	NA NA
26271_at	26271	LOC26271	FBXO5	Lymphoid	NA	NA	NA	NA	NA	NA	NA	NA	NA	NA	NA	NA	NA NA
26270_at	26270	LOC26270	FBXO6	Multiple	NA	NA	NA	NA	NA	NA	NA	NA	NA	NA	NA	NA	NA NA
2204_at	2204	LOC2204	FCAR	Myeloid	NA	NA	NA	NA	NA	NA	NA	NA	NA	NA	NA	NA	NA NA
2205_at	2205	LOC2205	FCER1A	Multiple	NA	NA	NA	NA	NA	NA	NA	NA	NA	NA	NA	NA	NA NA
2212_at	2212	LOC2212	FCGR2A	Myeloid	NA	NA	NA	NA	NA	NA	NA	NA	NA	NA	NA	NA	NA NA
2215_at	2215	LOC2215	FCGR3B	Neutrophil	NA	NA	NA	NA	NA	NA	NA	NA	NA	NA	NA	NA	NA NA
2219_at	2219	LOC2219	FCN1	Myeloid	NA	NA	NA	NA	NA	NA	NA	NA	NA	NA	NA	NA	NA NA
115350_at	115350	LOC115350	FCRL1	B Cell	NA	NA	NA	NA	NA	NA	NA	NA	NA	NA	NA	NA	NA NA
79368_at	79368	LOC79368	FCRL2	B Cell	NA	NA	NA	NA	NA	NA	NA	NA	NA	NA	NA	NA	NA NA
83416_at	83416	LOC83416	FCRL5	B Cell	NA	NA	NA	NA	NA	NA	NA	NA	NA	NA	NA	NA	NA NA
84824_at	84824	LOC84824	FCRLA	B Cell	NA	NA	NA	NA	NA	NA	NA	NA	NA	NA	NA	NA	NA NA
2230_at	2230	LOC2230	FDX1	Multiple	NA	NA	NA	NA	NA	NA	NA	NA	NA	NA	NA	NA	NA NA
2237_at	2237	LOC2237	FEN1	Lymphoid	NA	NA	NA	NA	NA	NA	NA	NA	NA	NA	NA	NA	NA NA
83706_at	83706	LOC83706	FERMT3	Multiple	NA	NA	NA	NA	NA	NA	NA	NA	NA	NA	NA	NA	NA NA
9637_at	9637	LOC9637	FEZ2	Myeloid	NA	NA	NA	NA	NA	NA	NA	NA	NA	NA	NA	NA	NA NA
2867_at	2867	LOC2867	FFAR2	Neutrophil	NA	NA	NA	NA	NA	NA	NA	NA	NA	NA	NA	NA	NA NA
89846_at	89846	LOC89846	FGD3	Multiple	NA	NA	NA	NA	NA	NA	NA	NA	NA	NA	NA	NA	NA NA
83888_at	83888	LOC83888	FGFBP2	Lymphoid	NA	NA	NA	NA	NA	NA	NA	NA	NA	NA	NA	NA	NA NA
2268_at	2268	LOC2268	FGR	Multiple	NA	NA	NA	NA	NA	NA	NA	NA	NA	NA	NA	NA	NA NA
63979_at	63979	LOC63979	FIGNL1	Multiple	NA	NA	NA	NA	NA	NA	NA	NA	NA	NA	NA	NA	NA NA
51303_at	51303	LOC51303	FKBP11	B Cell	NA	NA	NA	NA	NA	NA	NA	NA	NA	NA	NA	NA	NA NA
2313_at	2313	LOC2313	FLI1	Multiple	NA	NA	NA	NA	NA	NA	NA	NA	NA	NA	NA	NA	NA NA
2319_at	2319	LOC2319	FLOT2	Multiple	NA	NA	NA	NA	NA	NA	NA	NA	NA	NA	NA	NA	NA NA
55640_at	55640	LOC55640	FLVCR2	Myeloid	NA	NA	NA	NA	NA	NA	NA	NA	NA	NA	NA	NA	NA NA
23048_at	23048	LOC23048	FNBP1	Multiple	NA	NA	NA	NA	NA	NA	NA	NA	NA	NA	NA	NA	NA NA
64778_at	64778	LOC64778	FNDC3B	Myeloid	NA	NA	NA	NA	NA	NA	NA	NA	NA	NA	NA	NA	NA NA
3344_at	3344	LOC3344	FOXN2	Multiple	NA	NA	NA	NA	NA	NA	NA	NA	NA	NA	NA	NA	NA NA
2358_at	2358	LOC2358	FPR2	Neutrophil	NA	NA	NA	NA	NA	NA	NA	NA	NA	NA	NA	NA	NA NA
2359_at	2359	LOC2359	FPR3	Myeloid	NA	NA	NA	NA	NA	NA	NA	NA	NA	NA	NA	NA	NA NA
10023_at	10023	LOC10023	FRAT1	Myeloid	NA	NA	NA	NA	NA	NA	NA	NA	NA	NA	NA	NA	NA NA
23401_at	23401	LOC23401	FRAT2	Neutrophil	NA	NA	NA	NA	NA	NA	NA	NA	NA	NA	NA	NA	NA NA
6624_at	6624	LOC6624	FSCN1	Dendritic Cell	NA	NA	NA	NA	NA	NA	NA	NA	NA	NA	NA	NA	NA NA
2521_at	2521	LOC2521	FUS	Lymphoid	NA	NA	NA	NA	NA	NA	NA	NA	NA	NA	NA	NA	NA NA
170384_at	170384	LOC170384	FUT11	Multiple	NA	NA	NA	NA	NA	NA	NA	NA	NA	NA	NA	NA	NA NA
2533_at	2533	LOC2533	FYB	Myeloid	NA	NA	NA	NA	NA	NA	NA	NA	NA	NA	NA	NA	NA NA
55632_at	55632	LOC55632	G2E3	Multiple	NA	NA	NA	NA	NA	NA	NA	NA	NA	NA	NA	NA	NA NA
2539_at	2539	LOC2539	G6PD	Multiple	NA	NA	NA	NA	NA	NA	NA	NA	NA	NA	NA	NA	NA NA
2633_at	2633	LOC2633	GBP1	Multiple	NA	NA	NA	NA	NA	NA	NA	NA	NA	NA	NA	NA	NA NA
25801_at	25801	LOC25801	GCA	Myeloid	NA	NA	NA	NA	NA	NA	NA	NA	NA	NA	NA	NA	NA NA
79893_at	79893	LOC79893	GGNBP2	Multiple	NA	NA	NA	NA	NA	NA	NA	NA	NA	NA	NA	NA	NA NA
170575_at	170575	LOC170575	GIMAP1	Multiple	NA	NA	NA	NA	NA	NA	NA	NA	NA	NA	NA	NA	NA NA
26157_at	26157	LOC26157	GIMAP2	Multiple	NA	NA	NA	NA	NA	NA	NA	NA	NA	NA	NA	NA	NA NA
55303_at	55303	LOC55303	GIMAP4	Multiple	NA	NA	NA	NA	NA	NA	NA	NA	NA	NA	NA	NA	NA NA
168537_at	168537	LOC168537	GIMAP7	Multiple	NA	NA	NA	NA	NA	NA	NA	NA	NA	NA	NA	NA	NA NA
2706_at	2706	LOC2706	GJB2	Monocyte	NA	NA	NA	NA	NA	NA	NA	NA	NA	NA	NA	NA	NA NA
2717_at	2717	LOC2717	GLA	Myeloid	NA	NA	NA	NA	NA	NA	NA	NA	NA	NA	NA	NA	NA NA
11010_at	11010	LOC11010	GLIPR1	Multiple	NA	NA	NA	NA	NA	NA	NA	NA	NA	NA	NA	NA	NA NA
152007_at	152007	LOC152007	GLIPR2	Multiple	NA	NA	NA	NA	NA	NA	NA	NA	NA	NA	NA	NA	NA NA
2744_at	2744	LOC2744	GLS	Multiple	NA	NA	NA	NA	NA	NA	NA	NA	NA	NA	NA	NA	NA NA
144423_at	144423	LOC144423	GLT1D1	Myeloid	NA	NA	NA	NA	NA	NA	NA	NA	NA	NA	NA	NA	NA NA
2760_at	2760	LOC2760	GM2A	Myeloid	NA	NA	NA	NA	NA	NA	NA	NA	NA	NA	NA	NA	NA NA
2764_at	2764	LOC2764	GMFB	Myeloid	NA	NA	NA	NA	NA	NA	NA	NA	NA	NA	NA	NA	NA NA
51291_at	51291	LOC51291	GMIP	Multiple	NA	NA	NA	NA	NA	NA	NA	NA	NA	NA	NA	NA	NA NA
29925_at	29925	LOC29925	GMPPB	Lymphoid	NA	NA	NA	NA	NA	NA	NA	NA	NA	NA	NA	NA	NA NA
2769_at	2769	LOC2769	GNA15	Monocyte	NA	NA	NA	NA	NA	NA	NA	NA	NA	NA	NA	NA	NA NA
2778_at	2778	LOC2778	GNAS	Multiple	NA	NA	NA	NA	NA	NA	NA	NA	NA	NA	NA	NA	NA NA
59345_at	59345	LOC59345	GNB4	Multiple	NA	NA	NA	NA	NA	NA	NA	NA	NA	NA	NA	NA	NA NA
54331_at	54331	LOC54331	GNG2	Lymphoid	NA	NA	NA	NA	NA	NA	NA	NA	NA	NA	NA	NA	NA NA
10578_at	10578	LOC10578	GNLY	Lymphoid	NA	NA	NA	NA	NA	NA	NA	NA	NA	NA	NA	NA	NA NA
2796_at	2796	LOC2796	GNRH1	Myeloid	NA	NA	NA	NA	NA	NA	NA	NA	NA	NA	NA	NA	NA NA
2799_at	2799	LOC2799	GNS	Myeloid	NA	NA	NA	NA	NA	NA	NA	NA	NA	NA	NA	NA	NA NA
7918_at	7918	LOC7918	GPANK1	Multiple	NA	NA	NA	NA	NA	NA	NA	NA	NA	NA	NA	NA	NA NA
55668_at	55668	LOC55668	GPATCH2L	Multiple	NA	NA	NA	NA	NA	NA	NA	NA	NA	NA	NA	NA	NA NA
54865_at	54865	LOC54865	GPATCH4	T Cell	NA	NA	NA	NA	NA	NA	NA	NA	NA	NA	NA	NA	NA NA
221188_at	221188	LOC221188	GPR114	Lymphoid	NA	NA	NA	NA	NA	NA	NA	NA	NA	NA	NA	NA	NA NA
29933_at	29933	LOC29933	GPR132	Multiple	NA	NA	NA	NA	NA	NA	NA	NA	NA	NA	NA	NA	NA NA
2838_at	2838	LOC2838	GPR15	T Cell	NA	NA	NA	NA	NA	NA	NA	NA	NA	NA	NA	NA	NA NA
29909_at	29909	LOC29909	GPR171	Multiple	NA	NA	NA	NA	NA	NA	NA	NA	NA	NA	NA	NA	NA NA
84636_at	84636	LOC84636	GPR174	Lymphoid	NA	NA	NA	NA	NA	NA	NA	NA	NA	NA	NA	NA	NA NA
1880_at	1880	LOC1880	GPR183	Multiple	NA	NA	NA	NA	NA	NA	NA	NA	NA	NA	NA	NA	NA NA
2850_at	2850	LOC2850	GPR27	Neutrophil	NA	NA	NA	NA	NA	NA	NA	NA	NA	NA	NA	NA	NA NA
8477_at	8477	LOC8477	GPR65	Multiple	NA	NA	NA	NA	NA	NA	NA	NA	NA	NA	NA	NA	NA NA
8111_at	8111	LOC8111	GPR68	Multiple	NA	NA	NA	NA	NA	NA	NA	NA	NA	NA	NA	NA	NA NA
53831_at	53831	LOC53831	GPR84	Monocyte	NA	NA	NA	NA	NA	NA	NA	NA	NA	NA	NA	NA	NA NA
55507_at	55507	LOC55507	GPRC5D	B Cell	NA	NA	NA	NA	NA	NA	NA	NA	NA	NA	NA	NA	NA NA
285513_at	285513	LOC285513	GPRIN3	Multiple	NA	NA	NA	NA	NA	NA	NA	NA	NA	NA	NA	NA	NA NA
2874_at	2874	LOC2874	GPS2	Multiple	NA	NA	NA	NA	NA	NA	NA	NA	NA	NA	NA	NA	NA NA
57655_at	57655	LOC57655	GRAMD1A	Myeloid	NA	NA	NA	NA	NA	NA	NA	NA	NA	NA	NA	NA	NA NA
2885_at	2885	LOC2885	GRB2	Multiple	NA	NA	NA	NA	NA	NA	NA	NA	NA	NA	NA	NA	NA NA
2907_at	2907	LOC2907	GRINA	Myeloid	NA	NA	NA	NA	NA	NA	NA	NA	NA	NA	NA	NA	NA NA
2926_at	2926	LOC2926	GRSF1	Dendritic Cell	NA	NA	NA	NA	NA	NA	NA	NA	NA	NA	NA	NA	NA NA
2934_at	2934	LOC2934	GSN	Myeloid	NA	NA	NA	NA	NA	NA	NA	NA	NA	NA	NA	NA	NA NA
2935_at	2935	LOC2935	GSPT1	Multiple	NA	NA	NA	NA	NA	NA	NA	NA	NA	NA	NA	NA	NA NA
2957_at	2957	LOC2957	GTF2A1	Multiple	NA	NA	NA	NA	NA	NA	NA	NA	NA	NA	NA	NA	NA NA
84705_at	84705	LOC84705	GTPBP3	Multiple	NA	NA	NA	NA	NA	NA	NA	NA	NA	NA	NA	NA	NA NA
23560_at	23560	LOC23560	GTPBP4	Lymphoid	NA	NA	NA	NA	NA	NA	NA	NA	NA	NA	NA	NA	NA NA
2999_at	2999	LOC2999	GZMH	Lymphoid	NA	NA	NA	NA	NA	NA	NA	NA	NA	NA	NA	NA	NA NA
3003_at	3003	LOC3003	GZMK	T Cell	NA	NA	NA	NA	NA	NA	NA	NA	NA	NA	NA	NA	NA NA
3004_at	3004	LOC3004	GZMM	Lymphoid	NA	NA	NA	NA	NA	NA	NA	NA	NA	NA	NA	NA	NA NA
3014_at	3014	LOC3014	H2AFX	T Cell	NA	NA	NA	NA	NA	NA	NA	NA	NA	NA	NA	NA	NA NA
9555_at	9555	LOC9555	H2AFY	Multiple	NA	NA	NA	NA	NA	NA	NA	NA	NA	NA	NA	NA	NA NA
3015_at	3015	LOC3015	H2AFZ	Multiple	NA	NA	NA	NA	NA	NA	NA	NA	NA	NA	NA	NA	NA NA
9563_at	9563	LOC9563	H6PD	Dendritic Cell	NA	NA	NA	NA	NA	NA	NA	NA	NA	NA	NA	NA	NA NA
115106_at	115106	LOC115106	HAUS1	T Cell	NA	NA	NA	NA	NA	NA	NA	NA	NA	NA	NA	NA	NA NA
23354_at	23354	LOC23354	HAUS5	Multiple	NA	NA	NA	NA	NA	NA	NA	NA	NA	NA	NA	NA	NA NA
54801_at	54801	LOC54801	HAUS6	Lymphoid	NA	NA	NA	NA	NA	NA	NA	NA	NA	NA	NA	NA	NA NA
1839_at	1839	LOC1839	HBEGF	Monocyte	NA	NA	NA	NA	NA	NA	NA	NA	NA	NA	NA	NA	NA NA
3055_at	3055	LOC3055	HCK	Myeloid	NA	NA	NA	NA	NA	NA	NA	NA	NA	NA	NA	NA	NA NA
3059_at	3059	LOC3059	HCLS1	Multiple	NA	NA	NA	NA	NA	NA	NA	NA	NA	NA	NA	NA	NA NA
10870_at	10870	LOC10870	HCST	Multiple	NA	NA	NA	NA	NA	NA	NA	NA	NA	NA	NA	NA	NA NA
50810_at	50810	LOC50810	HDGF2	T Cell	NA	NA	NA	NA	NA	NA	NA	NA	NA	NA	NA	NA	NA NA
3070_at	3070	LOC3070	HELLS	Lymphoid	NA	NA	NA	NA	NA	NA	NA	NA	NA	NA	NA	NA	NA NA
51191_at	51191	LOC51191	HERC5	Multiple	NA	NA	NA	NA	NA	NA	NA	NA	NA	NA	NA	NA	NA NA
64224_at	64224	LOC64224	HERPUD2	Multiple	NA	NA	NA	NA	NA	NA	NA	NA	NA	NA	NA	NA	NA NA
204851_at	204851	LOC204851	HIPK1	Multiple	NA	NA	NA	NA	NA	NA	NA	NA	NA	NA	NA	NA	NA NA
28996_at	28996	LOC28996	HIPK2	Multiple	NA	NA	NA	NA	NA	NA	NA	NA	NA	NA	NA	NA	NA NA
3101_at	3101	LOC3101	HK3	Myeloid	NA	NA	NA	NA	NA	NA	NA	NA	NA	NA	NA	NA	NA NA
3112_at	3112	LOC3112	HLA-DOB	Multiple	NA	NA	NA	NA	NA	NA	NA	NA	NA	NA	NA	NA	NA NA
3113_at	3113	LOC3113	HLA-DPA1	Multiple	NA	NA	NA	NA	NA	NA	NA	NA	NA	NA	NA	NA	NA NA
3119_at	3119	LOC3119	HLA-DQB1	Dendritic Cell	NA	NA	NA	NA	NA	NA	NA	NA	NA	NA	NA	NA	NA NA
3142_at	3142	LOC3142	HLX	Myeloid	NA	NA	NA	NA	NA	NA	NA	NA	NA	NA	NA	NA	NA NA
10362_at	10362	LOC10362	HMG20B	Dendritic Cell	NA	NA	NA	NA	NA	NA	NA	NA	NA	NA	NA	NA	NA NA
3146_at	3146	LOC3146	HMGB1	Lymphoid	NA	NA	NA	NA	NA	NA	NA	NA	NA	NA	NA	NA	NA NA
3148_at	3148	LOC3148	HMGB2	Multiple	NA	NA	NA	NA	NA	NA	NA	NA	NA	NA	NA	NA	NA NA
3161_at	3161	LOC3161	HMMR	T Cell	NA	NA	NA	NA	NA	NA	NA	NA	NA	NA	NA	NA	NA NA
3162_at	3162	LOC3162	HMOX1	Dendritic Cell	NA	NA	NA	NA	NA	NA	NA	NA	NA	NA	NA	NA	NA NA
3183_at	3183	LOC3183	HNRNPC	Multiple	NA	NA	NA	NA	NA	NA	NA	NA	NA	NA	NA	NA	NA NA
3184_at	3184	LOC3184	HNRNPD	Multiple	NA	NA	NA	NA	NA	NA	NA	NA	NA	NA	NA	NA	NA NA
92906_at	92906	LOC92906	HNRNPLL	Multiple	NA	NA	NA	NA	NA	NA	NA	NA	NA	NA	NA	NA	NA NA
10236_at	10236	LOC10236	HNRNPR	Multiple	NA	NA	NA	NA	NA	NA	NA	NA	NA	NA	NA	NA	NA NA
10855_at	10855	LOC10855	HPSE	Myeloid	NA	NA	NA	NA	NA	NA	NA	NA	NA	NA	NA	NA	NA NA
9953_at	9953	LOC9953	HS3ST3B1	Monocyte	NA	NA	NA	NA	NA	NA	NA	NA	NA	NA	NA	NA	NA NA
7184_at	7184	LOC7184	HSP90B1	B Cell	NA	NA	NA	NA	NA	NA	NA	NA	NA	NA	NA	NA	NA NA
6782_at	6782	LOC6782	HSPA13	B Cell	NA	NA	NA	NA	NA	NA	NA	NA	NA	NA	NA	NA	NA NA
3310_at	3310	LOC3310	HSPA6	Neutrophil	NA	NA	NA	NA	NA	NA	NA	NA	NA	NA	NA	NA	NA NA
84329_at	84329	LOC84329	HVCN1	Multiple	NA	NA	NA	NA	NA	NA	NA	NA	NA	NA	NA	NA	NA NA
3384_at	3384	LOC3384	ICAM2	Lymphoid	NA	NA	NA	NA	NA	NA	NA	NA	NA	NA	NA	NA	NA NA
3385_at	3385	LOC3385	ICAM3	Multiple	NA	NA	NA	NA	NA	NA	NA	NA	NA	NA	NA	NA	NA NA
29851_at	29851	LOC29851	ICOS	T Cell	NA	NA	NA	NA	NA	NA	NA	NA	NA	NA	NA	NA	NA NA
3423_at	3423	LOC3423	IDS	Multiple	NA	NA	NA	NA	NA	NA	NA	NA	NA	NA	NA	NA	NA NA
8870_at	8870	LOC8870	IER3	Monocyte	NA	NA	NA	NA	NA	NA	NA	NA	NA	NA	NA	NA	NA NA
51278_at	51278	LOC51278	IER5	Multiple	NA	NA	NA	NA	NA	NA	NA	NA	NA	NA	NA	NA	NA NA
3428_at	3428	LOC3428	IFI16	Lymphoid	NA	NA	NA	NA	NA	NA	NA	NA	NA	NA	NA	NA	NA NA
2537_at	2537	LOC2537	IFI6	Dendritic Cell	NA	NA	NA	NA	NA	NA	NA	NA	NA	NA	NA	NA	NA NA
3459_at	3459	LOC3459	IFNGR1	Myeloid	NA	NA	NA	NA	NA	NA	NA	NA	NA	NA	NA	NA	NA NA
3475_at	3475	LOC3475	IFRD1	Multiple	NA	NA	NA	NA	NA	NA	NA	NA	NA	NA	NA	NA	NA NA
3482_at	3482	LOC3482	IGF2R	Multiple	NA	NA	NA	NA	NA	NA	NA	NA	NA	NA	NA	NA	NA NA
79713_at	79713	LOC79713	IGFLR1	Multiple	NA	NA	NA	NA	NA	NA	NA	NA	NA	NA	NA	NA	NA NA
10261_at	10261	LOC10261	IGSF6	Myeloid	NA	NA	NA	NA	NA	NA	NA	NA	NA	NA	NA	NA	NA NA
121457_at	121457	LOC121457	IKBIP	Multiple	NA	NA	NA	NA	NA	NA	NA	NA	NA	NA	NA	NA	NA NA
10320_at	10320	LOC10320	IKZF1	Multiple	NA	NA	NA	NA	NA	NA	NA	NA	NA	NA	NA	NA	NA NA
22807_at	22807	LOC22807	IKZF2	Lymphoid	NA	NA	NA	NA	NA	NA	NA	NA	NA	NA	NA	NA	NA NA
3597_at	3597	LOC3597	IL13RA1	Myeloid	NA	NA	NA	NA	NA	NA	NA	NA	NA	NA	NA	NA	NA NA
3603_at	3603	LOC3603	IL16	Multiple	NA	NA	NA	NA	NA	NA	NA	NA	NA	NA	NA	NA	NA NA
112744_at	112744	LOC112744	IL17F	T Cell	NA	NA	NA	NA	NA	NA	NA	NA	NA	NA	NA	NA	NA NA
23765_at	23765	LOC23765	IL17RA	Myeloid	NA	NA	NA	NA	NA	NA	NA	NA	NA	NA	NA	NA	NA NA
8807_at	8807	LOC8807	IL18RAP	Multiple	NA	NA	NA	NA	NA	NA	NA	NA	NA	NA	NA	NA	NA NA
29949_at	29949	LOC29949	IL19	Monocyte	NA	NA	NA	NA	NA	NA	NA	NA	NA	NA	NA	NA	NA NA
3557_at	3557	LOC3557	IL1RN	Monocyte	NA	NA	NA	NA	NA	NA	NA	NA	NA	NA	NA	NA	NA NA
50615_at	50615	LOC50615	IL21R	Multiple	NA	NA	NA	NA	NA	NA	NA	NA	NA	NA	NA	NA	NA NA
50616_at	50616	LOC50616	IL22	T Cell	NA	NA	NA	NA	NA	NA	NA	NA	NA	NA	NA	NA	NA NA
9466_at	9466	LOC9466	IL27RA	Multiple	NA	NA	NA	NA	NA	NA	NA	NA	NA	NA	NA	NA	NA NA
3559_at	3559	LOC3559	IL2RA	Multiple	NA	NA	NA	NA	NA	NA	NA	NA	NA	NA	NA	NA	NA NA
3561_at	3561	LOC3561	IL2RG	Multiple	NA	NA	NA	NA	NA	NA	NA	NA	NA	NA	NA	NA	NA NA
9235_at	9235	LOC9235	IL32	Lymphoid	NA	NA	NA	NA	NA	NA	NA	NA	NA	NA	NA	NA	NA NA
56300_at	56300	LOC56300	IL36G	Monocyte	NA	NA	NA	NA	NA	NA	NA	NA	NA	NA	NA	NA	NA NA
3563_at	3563	LOC3563	IL3RA	Monocyte	NA	NA	NA	NA	NA	NA	NA	NA	NA	NA	NA	NA	NA NA
259307_at	259307	LOC259307	IL4I1	Multiple	NA	NA	NA	NA	NA	NA	NA	NA	NA	NA	NA	NA	NA NA
3570_at	3570	LOC3570	IL6R	Myeloid	NA	NA	NA	NA	NA	NA	NA	NA	NA	NA	NA	NA	NA NA
3578_at	3578	LOC3578	IL9	T Cell	NA	NA	NA	NA	NA	NA	NA	NA	NA	NA	NA	NA	NA NA
3608_at	3608	LOC3608	ILF2	Multiple	NA	NA	NA	NA	NA	NA	NA	NA	NA	NA	NA	NA	NA NA
3619_at	3619	LOC3619	INCENP	Multiple	NA	NA	NA	NA	NA	NA	NA	NA	NA	NA	NA	NA	NA NA
58493_at	58493	LOC58493	INIP	Multiple	NA	NA	NA	NA	NA	NA	NA	NA	NA	NA	NA	NA	NA NA
8821_at	8821	LOC8821	INPP4B	T Cell	NA	NA	NA	NA	NA	NA	NA	NA	NA	NA	NA	NA	NA NA
3633_at	3633	LOC3633	INPP5B	Monocyte	NA	NA	NA	NA	NA	NA	NA	NA	NA	NA	NA	NA	NA NA
3635_at	3635	LOC3635	INPP5D	Multiple	NA	NA	NA	NA	NA	NA	NA	NA	NA	NA	NA	NA	NA NA
8826_at	8826	LOC8826	IQGAP1	Multiple	NA	NA	NA	NA	NA	NA	NA	NA	NA	NA	NA	NA	NA NA
3656_at	3656	LOC3656	IRAK2	Monocyte	NA	NA	NA	NA	NA	NA	NA	NA	NA	NA	NA	NA	NA NA
81875_at	81875	LOC81875	ISG20L2	Multiple	NA	NA	NA	NA	NA	NA	NA	NA	NA	NA	NA	NA	NA NA
57461_at	57461	LOC57461	ISY1	Multiple	NA	NA	NA	NA	NA	NA	NA	NA	NA	NA	NA	NA	NA NA
3676_at	3676	LOC3676	ITGA4	Multiple	NA	NA	NA	NA	NA	NA	NA	NA	NA	NA	NA	NA	NA NA
3683_at	3683	LOC3683	ITGAL	Multiple	NA	NA	NA	NA	NA	NA	NA	NA	NA	NA	NA	NA	NA NA
3684_at	3684	LOC3684	ITGAM	Multiple	NA	NA	NA	NA	NA	NA	NA	NA	NA	NA	NA	NA	NA NA
3687_at	3687	LOC3687	ITGAX	Myeloid	NA	NA	NA	NA	NA	NA	NA	NA	NA	NA	NA	NA	NA NA
3689_at	3689	LOC3689	ITGB2	Multiple	NA	NA	NA	NA	NA	NA	NA	NA	NA	NA	NA	NA	NA NA
3696_at	3696	LOC3696	ITGB8	Myeloid	NA	NA	NA	NA	NA	NA	NA	NA	NA	NA	NA	NA	NA NA
3707_at	3707	LOC3707	ITPKB	Lymphoid	NA	NA	NA	NA	NA	NA	NA	NA	NA	NA	NA	NA	NA NA
162073_at	162073	LOC162073	ITPRIPL2	Myeloid	NA	NA	NA	NA	NA	NA	NA	NA	NA	NA	NA	NA	NA NA
10625_at	10625	LOC10625	IVNS1ABP	NK Cell	NA	NA	NA	NA	NA	NA	NA	NA	NA	NA	NA	NA	NA NA
3718_at	3718	LOC3718	JAK3	Multiple	NA	NA	NA	NA	NA	NA	NA	NA	NA	NA	NA	NA	NA NA
83700_at	83700	LOC83700	JAM3	Multiple	NA	NA	NA	NA	NA	NA	NA	NA	NA	NA	NA	NA	NA NA
221037_at	221037	LOC221037	JMJD1C	Myeloid	NA	NA	NA	NA	NA	NA	NA	NA	NA	NA	NA	NA	NA NA
3725_at	3725	LOC3725	JUN	B Cell	NA	NA	NA	NA	NA	NA	NA	NA	NA	NA	NA	NA	NA NA
79768_at	79768	LOC79768	KATNBL1	Multiple	NA	NA	NA	NA	NA	NA	NA	NA	NA	NA	NA	NA	NA NA
25948_at	25948	LOC25948	KBTBD2	Multiple	NA	NA	NA	NA	NA	NA	NA	NA	NA	NA	NA	NA	NA NA
84541_at	84541	LOC84541	KBTBD8	Multiple	NA	NA	NA	NA	NA	NA	NA	NA	NA	NA	NA	NA	NA NA
3759_at	3759	LOC3759	KCNJ2	Myeloid	NA	NA	NA	NA	NA	NA	NA	NA	NA	NA	NA	NA	NA NA
9424_at	9424	LOC9424	KCNK6	Multiple	NA	NA	NA	NA	NA	NA	NA	NA	NA	NA	NA	NA	NA NA
115207_at	115207	LOC115207	KCTD12	Myeloid	NA	NA	NA	NA	NA	NA	NA	NA	NA	NA	NA	NA	NA NA
222658_at	222658	LOC222658	KCTD20	Multiple	NA	NA	NA	NA	NA	NA	NA	NA	NA	NA	NA	NA	NA NA
5927_at	5927	LOC5927	KDM5A	Multiple	NA	NA	NA	NA	NA	NA	NA	NA	NA	NA	NA	NA	NA NA
8284_at	8284	LOC8284	KDM5D	B Cell	NA	NA	NA	NA	NA	NA	NA	NA	NA	NA	NA	NA	NA NA
9768_at	9768	LOC9768	KIAA0101	Lymphoid	NA	NA	NA	NA	NA	NA	NA	NA	NA	NA	NA	NA	NA NA
9834_at	9834	LOC9834	KIAA0125	B Cell	NA	NA	NA	NA	NA	NA	NA	NA	NA	NA	NA	NA	NA NA
80183_at	80183	LOC80183	KIAA0226L	Multiple	NA	NA	NA	NA	NA	NA	NA	NA	NA	NA	NA	NA	NA NA
205717_at	205717	LOC205717	KIAA2018	Multiple	NA	NA	NA	NA	NA	NA	NA	NA	NA	NA	NA	NA	NA NA
9928_at	9928	LOC9928	KIF14	T Cell	NA	NA	NA	NA	NA	NA	NA	NA	NA	NA	NA	NA	NA NA
11004_at	11004	LOC11004	KIF2C	Lymphoid	NA	NA	NA	NA	NA	NA	NA	NA	NA	NA	NA	NA	NA NA
3811_at	3811	LOC3811	KIR3DL1	NK Cell	NA	NA	NA	NA	NA	NA	NA	NA	NA	NA	NA	NA	NA NA
7071_at	7071	LOC7071	KLF10	Monocyte	NA	NA	NA	NA	NA	NA	NA	NA	NA	NA	NA	NA	NA NA
11278_at	11278	LOC11278	KLF12	Lymphoid	NA	NA	NA	NA	NA	NA	NA	NA	NA	NA	NA	NA	NA NA
1316_at	1316	LOC1316	KLF6	B Cell	NA	NA	NA	NA	NA	NA	NA	NA	NA	NA	NA	NA	NA NA
57565_at	57565	LOC57565	KLHL14	B Cell	NA	NA	NA	NA	NA	NA	NA	NA	NA	NA	NA	NA	NA NA
89857_at	89857	LOC89857	KLHL6	Multiple	NA	NA	NA	NA	NA	NA	NA	NA	NA	NA	NA	NA	NA NA
3820_at	3820	LOC3820	KLRB1	Lymphoid	NA	NA	NA	NA	NA	NA	NA	NA	NA	NA	NA	NA	NA NA
3823_at	3823	LOC3823	KLRC3	Lymphoid	NA	NA	NA	NA	NA	NA	NA	NA	NA	NA	NA	NA	NA NA
8302_at	8302	LOC8302	KLRC4	Lymphoid	NA	NA	NA	NA	NA	NA	NA	NA	NA	NA	NA	NA	NA NA
51348_at	51348	LOC51348	KLRF1	NK Cell	NA	NA	NA	NA	NA	NA	NA	NA	NA	NA	NA	NA	NA NA
10219_at	10219	LOC10219	KLRG1	Lymphoid	NA	NA	NA	NA	NA	NA	NA	NA	NA	NA	NA	NA	NA NA
58508_at	58508	LOC58508	KMT2C	Multiple	NA	NA	NA	NA	NA	NA	NA	NA	NA	NA	NA	NA	NA NA
3837_at	3837	LOC3837	KPNB1	Multiple	NA	NA	NA	NA	NA	NA	NA	NA	NA	NA	NA	NA	NA NA
3845_at	3845	LOC3845	KRAS	Multiple	NA	NA	NA	NA	NA	NA	NA	NA	NA	NA	NA	NA	NA NA
25984_at	25984	LOC25984	KRT23	Neutrophil	NA	NA	NA	NA	NA	NA	NA	NA	NA	NA	NA	NA	NA NA
8942_at	8942	LOC8942	KYNU	Myeloid	NA	NA	NA	NA	NA	NA	NA	NA	NA	NA	NA	NA	NA NA
91133_at	91133	LOC91133	L3MBTL4	Dendritic Cell	NA	NA	NA	NA	NA	NA	NA	NA	NA	NA	NA	NA	NA NA
144811_at	144811	LOC144811	LACC1	Myeloid	NA	NA	NA	NA	NA	NA	NA	NA	NA	NA	NA	NA	NA NA
114294_at	114294	LOC114294	LACTB	Myeloid	NA	NA	NA	NA	NA	NA	NA	NA	NA	NA	NA	NA	NA NA
3916_at	3916	LOC3916	LAMP1	Myeloid	NA	NA	NA	NA	NA	NA	NA	NA	NA	NA	NA	NA	NA NA
7805_at	7805	LOC7805	LAPTM5	Multiple	NA	NA	NA	NA	NA	NA	NA	NA	NA	NA	NA	NA	NA NA
27040_at	27040	LOC27040	LAT	Multiple	NA	NA	NA	NA	NA	NA	NA	NA	NA	NA	NA	NA	NA NA
7462_at	7462	LOC7462	LAT2	Multiple	NA	NA	NA	NA	NA	NA	NA	NA	NA	NA	NA	NA	NA NA
3932_at	3932	LOC3932	LCK	Lymphoid	NA	NA	NA	NA	NA	NA	NA	NA	NA	NA	NA	NA	NA NA
3936_at	3936	LOC3936	LCP1	Multiple	NA	NA	NA	NA	NA	NA	NA	NA	NA	NA	NA	NA	NA NA
26119_at	26119	LOC26119	LDLRAP1	T Cell	NA	NA	NA	NA	NA	NA	NA	NA	NA	NA	NA	NA	NA NA
51176_at	51176	LOC51176	LEF1	T Cell	NA	NA	NA	NA	NA	NA	NA	NA	NA	NA	NA	NA	NA NA
23484_at	23484	LOC23484	LEPROTL1	T Cell	NA	NA	NA	NA	NA	NA	NA	NA	NA	NA	NA	NA	NA NA
3955_at	3955	LOC3955	LFNG	Multiple	NA	NA	NA	NA	NA	NA	NA	NA	NA	NA	NA	NA	NA NA
3976_at	3976	LOC3976	LIF	Lymphoid	NA	NA	NA	NA	NA	NA	NA	NA	NA	NA	NA	NA	NA NA
11024_at	11024	LOC11024	LILRA1	Myeloid	NA	NA	NA	NA	NA	NA	NA	NA	NA	NA	NA	NA	NA NA
10859_at	10859	LOC10859	LILRB1	Myeloid	NA	NA	NA	NA	NA	NA	NA	NA	NA	NA	NA	NA	NA NA
10288_at	10288	LOC10288	LILRB2	Myeloid	NA	NA	NA	NA	NA	NA	NA	NA	NA	NA	NA	NA	NA NA
3987_at	3987	LOC3987	LIMS1	Myeloid	NA	NA	NA	NA	NA	NA	NA	NA	NA	NA	NA	NA	NA NA
54072_at	54072	LOC54072	LINC00158	Monocyte	NA	NA	NA	NA	NA	NA	NA	NA	NA	NA	NA	NA	NA NA
9516_at	9516	LOC9516	LITAF	Myeloid	NA	NA	NA	NA	NA	NA	NA	NA	NA	NA	NA	NA	NA NA
54947_at	54947	LOC54947	LPCAT2	Myeloid	NA	NA	NA	NA	NA	NA	NA	NA	NA	NA	NA	NA	NA NA
9404_at	9404	LOC9404	LPXN	Multiple	NA	NA	NA	NA	NA	NA	NA	NA	NA	NA	NA	NA	NA NA
57622_at	57622	LOC57622	LRFN1	Multiple	NA	NA	NA	NA	NA	NA	NA	NA	NA	NA	NA	NA	NA NA
4033_at	4033	LOC4033	LRMP	Multiple	NA	NA	NA	NA	NA	NA	NA	NA	NA	NA	NA	NA	NA NA
26020_at	26020	LOC26020	LRP10	Myeloid	NA	NA	NA	NA	NA	NA	NA	NA	NA	NA	NA	NA	NA NA
65999_at	65999	LOC65999	LRRC61	T Cell	NA	NA	NA	NA	NA	NA	NA	NA	NA	NA	NA	NA	NA NA
84230_at	84230	LOC84230	LRRC8C	Multiple	NA	NA	NA	NA	NA	NA	NA	NA	NA	NA	NA	NA	NA NA
9208_at	9208	LOC9208	LRRFIP1	Monocyte	NA	NA	NA	NA	NA	NA	NA	NA	NA	NA	NA	NA	NA NA
54674_at	54674	LOC54674	LRRN3	T Cell	NA	NA	NA	NA	NA	NA	NA	NA	NA	NA	NA	NA	NA NA
7940_at	7940	LOC7940	LST1	Myeloid	NA	NA	NA	NA	NA	NA	NA	NA	NA	NA	NA	NA	NA NA
4049_at	4049	LOC4049	LTA	Lymphoid	NA	NA	NA	NA	NA	NA	NA	NA	NA	NA	NA	NA	NA NA
1241_at	1241	LOC1241	LTB4R	Myeloid	NA	NA	NA	NA	NA	NA	NA	NA	NA	NA	NA	NA	NA NA
4065_at	4065	LOC4065	LY75	Multiple	NA	NA	NA	NA	NA	NA	NA	NA	NA	NA	NA	NA	NA NA
4063_at	4063	LOC4063	LY9	Lymphoid	NA	NA	NA	NA	NA	NA	NA	NA	NA	NA	NA	NA	NA NA
23643_at	23643	LOC23643	LY96	Multiple	NA	NA	NA	NA	NA	NA	NA	NA	NA	NA	NA	NA	NA NA
55646_at	55646	LOC55646	LYAR	Lymphoid	NA	NA	NA	NA	NA	NA	NA	NA	NA	NA	NA	NA	NA NA
4067_at	4067	LOC4067	LYN	Myeloid	NA	NA	NA	NA	NA	NA	NA	NA	NA	NA	NA	NA	NA NA
1130_at	1130	LOC1130	LYST	Multiple	NA	NA	NA	NA	NA	NA	NA	NA	NA	NA	NA	NA	NA NA
54585_at	54585	LOC54585	LZTFL1	B Cell	NA	NA	NA	NA	NA	NA	NA	NA	NA	NA	NA	NA	NA NA
4074_at	4074	LOC4074	M6PR	Multiple	NA	NA	NA	NA	NA	NA	NA	NA	NA	NA	NA	NA	NA NA
4085_at	4085	LOC4085	MAD2L1	Lymphoid	NA	NA	NA	NA	NA	NA	NA	NA	NA	NA	NA	NA	NA NA
4094_at	4094	LOC4094	MAF	Multiple	NA	NA	NA	NA	NA	NA	NA	NA	NA	NA	NA	NA	NA NA
9935_at	9935	LOC9935	MAFB	Myeloid	NA	NA	NA	NA	NA	NA	NA	NA	NA	NA	NA	NA	NA NA
4121_at	4121	LOC4121	MAN1A1	B Cell	NA	NA	NA	NA	NA	NA	NA	NA	NA	NA	NA	NA	NA NA
4124_at	4124	LOC4124	MAN2A1	Multiple	NA	NA	NA	NA	NA	NA	NA	NA	NA	NA	NA	NA	NA NA
79694_at	79694	LOC79694	MANEA	B Cell	NA	NA	NA	NA	NA	NA	NA	NA	NA	NA	NA	NA	NA NA
54682_at	54682	LOC54682	MANSC1	Neutrophil	NA	NA	NA	NA	NA	NA	NA	NA	NA	NA	NA	NA	NA NA
4216_at	4216	LOC4216	MAP3K4	Myeloid	NA	NA	NA	NA	NA	NA	NA	NA	NA	NA	NA	NA	NA NA
1326_at	1326	LOC1326	MAP3K8	Multiple	NA	NA	NA	NA	NA	NA	NA	NA	NA	NA	NA	NA	NA NA
11184_at	11184	LOC11184	MAP4K1	Lymphoid	NA	NA	NA	NA	NA	NA	NA	NA	NA	NA	NA	NA	NA NA
79109_at	79109	LOC79109	MAPKAP1	Multiple	NA	NA	NA	NA	NA	NA	NA	NA	NA	NA	NA	NA	NA NA
4082_at	4082	LOC4082	MARCKS	Myeloid	NA	NA	NA	NA	NA	NA	NA	NA	NA	NA	NA	NA	NA NA
51765_at	51765	LOC51765	MASK	Multiple	NA	NA	NA	NA	NA	NA	NA	NA	NA	NA	NA	NA	NA NA
151963_at	151963	LOC151963	MB21D2	Multiple	NA	NA	NA	NA	NA	NA	NA	NA	NA	NA	NA	NA	NA NA
8932_at	8932	LOC8932	MBD2	Multiple	NA	NA	NA	NA	NA	NA	NA	NA	NA	NA	NA	NA	NA NA
8930_at	8930	LOC8930	MBD4	Multiple	NA	NA	NA	NA	NA	NA	NA	NA	NA	NA	NA	NA	NA NA
114785_at	114785	LOC114785	MBD6	Myeloid	NA	NA	NA	NA	NA	NA	NA	NA	NA	NA	NA	NA	NA NA
4154_at	4154	LOC4154	MBNL1	Multiple	NA	NA	NA	NA	NA	NA	NA	NA	NA	NA	NA	NA	NA NA
79143_at	79143	LOC79143	MBOAT7	Neutrophil	NA	NA	NA	NA	NA	NA	NA	NA	NA	NA	NA	NA	NA NA
4155_at	4155	LOC4155	MBP	Multiple	NA	NA	NA	NA	NA	NA	NA	NA	NA	NA	NA	NA	NA NA
4170_at	4170	LOC4170	MCL1	Myeloid	NA	NA	NA	NA	NA	NA	NA	NA	NA	NA	NA	NA	NA NA
55388_at	55388	LOC55388	MCM10	Lymphoid	NA	NA	NA	NA	NA	NA	NA	NA	NA	NA	NA	NA	NA NA
4171_at	4171	LOC4171	MCM2	Lymphoid	NA	NA	NA	NA	NA	NA	NA	NA	NA	NA	NA	NA	NA NA
4174_at	4174	LOC4174	MCM5	Multiple	NA	NA	NA	NA	NA	NA	NA	NA	NA	NA	NA	NA	NA NA
4175_at	4175	LOC4175	MCM6	Lymphoid	NA	NA	NA	NA	NA	NA	NA	NA	NA	NA	NA	NA	NA NA
4176_at	4176	LOC4176	MCM7	Lymphoid	NA	NA	NA	NA	NA	NA	NA	NA	NA	NA	NA	NA	NA NA
79892_at	79892	LOC79892	MCMBP	Multiple	NA	NA	NA	NA	NA	NA	NA	NA	NA	NA	NA	NA	NA NA
57192_at	57192	LOC57192	MCOLN1	Lymphoid	NA	NA	NA	NA	NA	NA	NA	NA	NA	NA	NA	NA	NA NA
255231_at	255231	LOC255231	MCOLN2	Multiple	NA	NA	NA	NA	NA	NA	NA	NA	NA	NA	NA	NA	NA NA
55784_at	55784	LOC55784	MCTP2	Multiple	NA	NA	NA	NA	NA	NA	NA	NA	NA	NA	NA	NA	NA NA
9439_at	9439	LOC9439	MED23	Lymphoid	NA	NA	NA	NA	NA	NA	NA	NA	NA	NA	NA	NA	NA NA
90390_at	90390	LOC90390	MED30	Multiple	NA	NA	NA	NA	NA	NA	NA	NA	NA	NA	NA	NA	NA NA
4205_at	4205	LOC4205	MEF2A	Multiple	NA	NA	NA	NA	NA	NA	NA	NA	NA	NA	NA	NA	NA NA
4210_at	4210	LOC4210	MEFV	Multiple	NA	NA	NA	NA	NA	NA	NA	NA	NA	NA	NA	NA	NA NA
1955_at	1955	LOC1955	MEGF9	Myeloid	NA	NA	NA	NA	NA	NA	NA	NA	NA	NA	NA	NA	NA NA
9833_at	9833	LOC9833	MELK	T Cell	NA	NA	NA	NA	NA	NA	NA	NA	NA	NA	NA	NA	NA NA
151194_at	151194	LOC151194	METTL21A	Multiple	NA	NA	NA	NA	NA	NA	NA	NA	NA	NA	NA	NA	NA NA
51108_at	51108	LOC51108	METTL9	Myeloid	NA	NA	NA	NA	NA	NA	NA	NA	NA	NA	NA	NA	NA NA
51320_at	51320	LOC51320	MEX3C	Lymphoid	NA	NA	NA	NA	NA	NA	NA	NA	NA	NA	NA	NA	NA NA
4242_at	4242	LOC4242	MFNG	Multiple	NA	NA	NA	NA	NA	NA	NA	NA	NA	NA	NA	NA	NA NA
64747_at	64747	LOC64747	MFSD1	Myeloid	NA	NA	NA	NA	NA	NA	NA	NA	NA	NA	NA	NA	NA NA
126321_at	126321	LOC126321	MFSD12	Dendritic Cell	NA	NA	NA	NA	NA	NA	NA	NA	NA	NA	NA	NA	NA NA
4247_at	4247	LOC4247	MGAT2	Lymphoid	NA	NA	NA	NA	NA	NA	NA	NA	NA	NA	NA	NA	NA NA
10724_at	10724	LOC10724	MGEA5	Multiple	NA	NA	NA	NA	NA	NA	NA	NA	NA	NA	NA	NA	NA NA
57409_at	57409	LOC57409	MIF4GD	Multiple	NA	NA	NA	NA	NA	NA	NA	NA	NA	NA	NA	NA	NA NA
54069_at	54069	LOC54069	MIS18A	T Cell	NA	NA	NA	NA	NA	NA	NA	NA	NA	NA	NA	NA	NA NA
55320_at	55320	LOC55320	MIS18BP1	Multiple	NA	NA	NA	NA	NA	NA	NA	NA	NA	NA	NA	NA	NA NA
129531_at	129531	LOC129531	MITD1	Multiple	NA	NA	NA	NA	NA	NA	NA	NA	NA	NA	NA	NA	NA NA
4288_at	4288	LOC4288	MKI67	T Cell	NA	NA	NA	NA	NA	NA	NA	NA	NA	NA	NA	NA	NA NA
9761_at	9761	LOC9761	MLEC	Multiple	NA	NA	NA	NA	NA	NA	NA	NA	NA	NA	NA	NA	NA NA
4312_at	4312	LOC4312	MMP1	Monocyte	NA	NA	NA	NA	NA	NA	NA	NA	NA	NA	NA	NA	NA NA
4321_at	4321	LOC4321	MMP12	Dendritic Cell	NA	NA	NA	NA	NA	NA	NA	NA	NA	NA	NA	NA	NA NA
4323_at	4323	LOC4323	MMP14	Monocyte	NA	NA	NA	NA	NA	NA	NA	NA	NA	NA	NA	NA	NA NA
4327_at	4327	LOC4327	MMP19	Monocyte	NA	NA	NA	NA	NA	NA	NA	NA	NA	NA	NA	NA	NA NA
4318_at	4318	LOC4318	MMP9	Monocyte	NA	NA	NA	NA	NA	NA	NA	NA	NA	NA	NA	NA	NA NA
4332_at	4332	LOC4332	MNDA	Myeloid	NA	NA	NA	NA	NA	NA	NA	NA	NA	NA	NA	NA	NA NA
55233_at	55233	LOC55233	MOB1A	Multiple	NA	NA	NA	NA	NA	NA	NA	NA	NA	NA	NA	NA	NA NA
92597_at	92597	LOC92597	MOB1B	Dendritic Cell	NA	NA	NA	NA	NA	NA	NA	NA	NA	NA	NA	NA	NA NA
126308_at	126308	LOC126308	MOB3A	Multiple	NA	NA	NA	NA	NA	NA	NA	NA	NA	NA	NA	NA	NA NA
219972_at	219972	LOC219972	MPEG1	Monocyte	NA	NA	NA	NA	NA	NA	NA	NA	NA	NA	NA	NA	NA NA
196264_at	196264	LOC196264	MPZL3	Multiple	NA	NA	NA	NA	NA	NA	NA	NA	NA	NA	NA	NA	NA NA
55686_at	55686	LOC55686	MREG	Myeloid	NA	NA	NA	NA	NA	NA	NA	NA	NA	NA	NA	NA	NA NA
55173_at	55173	LOC55173	MRPS10	Multiple	NA	NA	NA	NA	NA	NA	NA	NA	NA	NA	NA	NA	NA NA
51154_at	51154	LOC51154	MRTO4	Lymphoid	NA	NA	NA	NA	NA	NA	NA	NA	NA	NA	NA	NA	NA NA
931_at	931	LOC931	MS4A1	B Cell	NA	NA	NA	NA	NA	NA	NA	NA	NA	NA	NA	NA	NA NA
64231_at	64231	LOC64231	MS4A6A	Monocyte	NA	NA	NA	NA	NA	NA	NA	NA	NA	NA	NA	NA	NA NA
58475_at	58475	LOC58475	MS4A7	Myeloid	NA	NA	NA	NA	NA	NA	NA	NA	NA	NA	NA	NA	NA NA
4478_at	4478	LOC4478	MSN	Multiple	NA	NA	NA	NA	NA	NA	NA	NA	NA	NA	NA	NA	NA NA
51734_at	51734	LOC51734	MSRB1	Neutrophil	NA	NA	NA	NA	NA	NA	NA	NA	NA	NA	NA	NA	NA NA
92140_at	92140	LOC92140	MTDH	Multiple	NA	NA	NA	NA	NA	NA	NA	NA	NA	NA	NA	NA	NA NA
4520_at	4520	LOC4520	MTF1	Monocyte	NA	NA	NA	NA	NA	NA	NA	NA	NA	NA	NA	NA	NA NA
113115_at	113115	LOC113115	MTFR2	T Cell	NA	NA	NA	NA	NA	NA	NA	NA	NA	NA	NA	NA	NA NA
25902_at	25902	LOC25902	MTHFD1L	T Cell	NA	NA	NA	NA	NA	NA	NA	NA	NA	NA	NA	NA	NA NA
55149_at	55149	LOC55149	MTPAP	Multiple	NA	NA	NA	NA	NA	NA	NA	NA	NA	NA	NA	NA	NA NA
4084_at	4084	LOC4084	MXD1	Neutrophil	NA	NA	NA	NA	NA	NA	NA	NA	NA	NA	NA	NA	NA NA
4603_at	4603	LOC4603	MYBL1	Lymphoid	NA	NA	NA	NA	NA	NA	NA	NA	NA	NA	NA	NA	NA NA
4627_at	4627	LOC4627	MYH9	Multiple	NA	NA	NA	NA	NA	NA	NA	NA	NA	NA	NA	NA	NA NA
29116_at	29116	LOC29116	MYLIP	Multiple	NA	NA	NA	NA	NA	NA	NA	NA	NA	NA	NA	NA	NA NA
64005_at	64005	LOC64005	MYO1G	Multiple	NA	NA	NA	NA	NA	NA	NA	NA	NA	NA	NA	NA	NA NA
51237_at	51237	LOC51237	MZB1	B Cell	NA	NA	NA	NA	NA	NA	NA	NA	NA	NA	NA	NA	NA NA
90634_at	90634	LOC90634	N4BP2L1	Dendritic Cell	NA	NA	NA	NA	NA	NA	NA	NA	NA	NA	NA	NA	NA NA
80018_at	80018	LOC80018	NAA25	Dendritic Cell	NA	NA	NA	NA	NA	NA	NA	NA	NA	NA	NA	NA	NA NA
64859_at	64859	LOC64859	NABP1	Multiple	NA	NA	NA	NA	NA	NA	NA	NA	NA	NA	NA	NA	NA NA
65220_at	65220	LOC65220	NADK	Myeloid	NA	NA	NA	NA	NA	NA	NA	NA	NA	NA	NA	NA	NA NA
4668_at	4668	LOC4668	NAGA	Myeloid	NA	NA	NA	NA	NA	NA	NA	NA	NA	NA	NA	NA	NA NA
55577_at	55577	LOC55577	NAGK	Myeloid	NA	NA	NA	NA	NA	NA	NA	NA	NA	NA	NA	NA	NA NA
51172_at	51172	LOC51172	NAGPA	Dendritic Cell	NA	NA	NA	NA	NA	NA	NA	NA	NA	NA	NA	NA	NA NA
89796_at	89796	LOC89796	NAV1	Myeloid	NA	NA	NA	NA	NA	NA	NA	NA	NA	NA	NA	NA	NA NA
4683_at	4683	LOC4683	NBN	Multiple	NA	NA	NA	NA	NA	NA	NA	NA	NA	NA	NA	NA	NA NA
57552_at	57552	LOC57552	NCEH1	Myeloid	NA	NA	NA	NA	NA	NA	NA	NA	NA	NA	NA	NA	NA NA
4689_at	4689	LOC4689	NCF4	Neutrophil	NA	NA	NA	NA	NA	NA	NA	NA	NA	NA	NA	NA	NA NA
4690_at	4690	LOC4690	NCK1	Myeloid	NA	NA	NA	NA	NA	NA	NA	NA	NA	NA	NA	NA	NA NA
3071_at	3071	LOC3071	NCKAP1L	Multiple	NA	NA	NA	NA	NA	NA	NA	NA	NA	NA	NA	NA	NA NA
259197_at	259197	LOC259197	NCR3	Lymphoid	NA	NA	NA	NA	NA	NA	NA	NA	NA	NA	NA	NA	NA NA
54820_at	54820	LOC54820	NDE1	Multiple	NA	NA	NA	NA	NA	NA	NA	NA	NA	NA	NA	NA	NA NA
54602_at	54602	LOC54602	NDFIP2	T Cell	NA	NA	NA	NA	NA	NA	NA	NA	NA	NA	NA	NA	NA NA
56160_at	56160	LOC56160	NDNL2	T Cell	NA	NA	NA	NA	NA	NA	NA	NA	NA	NA	NA	NA	NA NA
55707_at	55707	LOC55707	NECAP2	Multiple	NA	NA	NA	NA	NA	NA	NA	NA	NA	NA	NA	NA	NA NA
10783_at	10783	LOC10783	NEK6	Myeloid	NA	NA	NA	NA	NA	NA	NA	NA	NA	NA	NA	NA	NA NA
81831_at	81831	LOC81831	NETO2	Multiple	NA	NA	NA	NA	NA	NA	NA	NA	NA	NA	NA	NA	NA NA
150372_at	150372	LOC150372	NFAM1	Myeloid	NA	NA	NA	NA	NA	NA	NA	NA	NA	NA	NA	NA	NA NA
4775_at	4775	LOC4775	NFATC3	Lymphoid	NA	NA	NA	NA	NA	NA	NA	NA	NA	NA	NA	NA	NA NA
4778_at	4778	LOC4778	NFE2	Myeloid	NA	NA	NA	NA	NA	NA	NA	NA	NA	NA	NA	NA	NA NA
84807_at	84807	LOC84807	NFKBID	Myeloid	NA	NA	NA	NA	NA	NA	NA	NA	NA	NA	NA	NA	NA NA
152518_at	152518	LOC152518	NFXL1	Dendritic Cell	NA	NA	NA	NA	NA	NA	NA	NA	NA	NA	NA	NA	NA NA
55768_at	55768	LOC55768	NGLY1	B Cell	NA	NA	NA	NA	NA	NA	NA	NA	NA	NA	NA	NA	NA NA
84365_at	84365	LOC84365	NIFK	Lymphoid	NA	NA	NA	NA	NA	NA	NA	NA	NA	NA	NA	NA	NA NA
51199_at	51199	LOC51199	NIN	Multiple	NA	NA	NA	NA	NA	NA	NA	NA	NA	NA	NA	NA	NA NA
4814_at	4814	LOC4814	NINJ1	Myeloid	NA	NA	NA	NA	NA	NA	NA	NA	NA	NA	NA	NA	NA NA
51388_at	51388	LOC51388	NIP7	Multiple	NA	NA	NA	NA	NA	NA	NA	NA	NA	NA	NA	NA	NA NA
25836_at	25836	LOC25836	NIPBL	Multiple	NA	NA	NA	NA	NA	NA	NA	NA	NA	NA	NA	NA	NA NA
4820_at	4820	LOC4820	NKTR	Multiple	NA	NA	NA	NA	NA	NA	NA	NA	NA	NA	NA	NA	NA NA
91662_at	91662	LOC91662	NLRP12	Myeloid	NA	NA	NA	NA	NA	NA	NA	NA	NA	NA	NA	NA	NA NA
199713_at	199713	LOC199713	NLRP7	B Cell	NA	NA	NA	NA	NA	NA	NA	NA	NA	NA	NA	NA	NA NA
4836_at	4836	LOC4836	NMT1	Multiple	NA	NA	NA	NA	NA	NA	NA	NA	NA	NA	NA	NA	NA NA
51602_at	51602	LOC51602	NOP58	Lymphoid	NA	NA	NA	NA	NA	NA	NA	NA	NA	NA	NA	NA	NA NA
4855_at	4855	LOC4855	NOTCH4	Multiple	NA	NA	NA	NA	NA	NA	NA	NA	NA	NA	NA	NA	NA NA
4864_at	4864	LOC4864	NPC1	Monocyte	NA	NA	NA	NA	NA	NA	NA	NA	NA	NA	NA	NA	NA NA
80896_at	80896	LOC80896	NPL	Myeloid	NA	NA	NA	NA	NA	NA	NA	NA	NA	NA	NA	NA	NA NA
8013_at	8013	LOC8013	NR4A3	Dendritic Cell	NA	NA	NA	NA	NA	NA	NA	NA	NA	NA	NA	NA	NA NA
29982_at	29982	LOC29982	NRBF2	Neutrophil	NA	NA	NA	NA	NA	NA	NA	NA	NA	NA	NA	NA	NA NA
56675_at	56675	LOC56675	NRIP3	Monocyte	NA	NA	NA	NA	NA	NA	NA	NA	NA	NA	NA	NA	NA NA
8829_at	8829	LOC8829	NRP1	Myeloid	NA	NA	NA	NA	NA	NA	NA	NA	NA	NA	NA	NA	NA NA
8828_at	8828	LOC8828	NRP2	Myeloid	NA	NA	NA	NA	NA	NA	NA	NA	NA	NA	NA	NA	NA NA
8439_at	8439	LOC8439	NSMAF	Myeloid	NA	NA	NA	NA	NA	NA	NA	NA	NA	NA	NA	NA	NA NA
51251_at	51251	LOC51251	NT5C3A	Dendritic Cell	NA	NA	NA	NA	NA	NA	NA	NA	NA	NA	NA	NA	NA NA
11051_at	11051	LOC11051	NUDT21	Lymphoid	NA	NA	NA	NA	NA	NA	NA	NA	NA	NA	NA	NA	NA NA
83540_at	83540	LOC83540	NUF2	T Cell	NA	NA	NA	NA	NA	NA	NA	NA	NA	NA	NA	NA	NA NA
8650_at	8650	LOC8650	NUMB	Myeloid	NA	NA	NA	NA	NA	NA	NA	NA	NA	NA	NA	NA	NA NA
9972_at	9972	LOC9972	NUP153	Multiple	NA	NA	NA	NA	NA	NA	NA	NA	NA	NA	NA	NA	NA NA
8021_at	8021	LOC8021	NUP214	Myeloid	NA	NA	NA	NA	NA	NA	NA	NA	NA	NA	NA	NA	NA NA
23636_at	23636	LOC23636	NUP62	Dendritic Cell	NA	NA	NA	NA	NA	NA	NA	NA	NA	NA	NA	NA	NA NA
9818_at	9818	LOC9818	NUPL1	Multiple	NA	NA	NA	NA	NA	NA	NA	NA	NA	NA	NA	NA	NA NA
116150_at	116150	LOC116150	NUS1	Multiple	NA	NA	NA	NA	NA	NA	NA	NA	NA	NA	NA	NA	NA NA
51203_at	51203	LOC51203	NUSAP1	Lymphoid	NA	NA	NA	NA	NA	NA	NA	NA	NA	NA	NA	NA	NA NA
91775_at	91775	LOC91775	NXPE3	B Cell	NA	NA	NA	NA	NA	NA	NA	NA	NA	NA	NA	NA	NA NA
4947_at	4947	LOC4947	OAZ2	Myeloid	NA	NA	NA	NA	NA	NA	NA	NA	NA	NA	NA	NA	NA NA
79627_at	79627	LOC79627	OGFRL1	Myeloid	NA	NA	NA	NA	NA	NA	NA	NA	NA	NA	NA	NA	NA NA
114884_at	114884	LOC114884	OSBPL10	B Cell	NA	NA	NA	NA	NA	NA	NA	NA	NA	NA	NA	NA	NA NA
114885_at	114885	LOC114885	OSBPL11	Myeloid	NA	NA	NA	NA	NA	NA	NA	NA	NA	NA	NA	NA	NA NA
114882_at	114882	LOC114882	OSBPL8	Multiple	NA	NA	NA	NA	NA	NA	NA	NA	NA	NA	NA	NA	NA NA
5008_at	5008	LOC5008	OSM	Multiple	NA	NA	NA	NA	NA	NA	NA	NA	NA	NA	NA	NA	NA NA
28962_at	28962	LOC28962	OSTM1	Multiple	NA	NA	NA	NA	NA	NA	NA	NA	NA	NA	NA	NA	NA NA
220213_at	220213	LOC220213	OTUD1	B Cell	NA	NA	NA	NA	NA	NA	NA	NA	NA	NA	NA	NA	NA NA
92106_at	92106	LOC92106	OXNAD1	T Cell	NA	NA	NA	NA	NA	NA	NA	NA	NA	NA	NA	NA	NA NA
5026_at	5026	LOC5026	P2RX5	Lymphoid	NA	NA	NA	NA	NA	NA	NA	NA	NA	NA	NA	NA	NA NA
5027_at	5027	LOC5027	P2RX7	Myeloid	NA	NA	NA	NA	NA	NA	NA	NA	NA	NA	NA	NA	NA NA
27334_at	27334	LOC27334	P2RY10	Multiple	NA	NA	NA	NA	NA	NA	NA	NA	NA	NA	NA	NA	NA NA
53829_at	53829	LOC53829	P2RY13	Myeloid	NA	NA	NA	NA	NA	NA	NA	NA	NA	NA	NA	NA	NA NA
286530_at	286530	LOC286530	P2RY8	Multiple	NA	NA	NA	NA	NA	NA	NA	NA	NA	NA	NA	NA	NA NA
5036_at	5036	LOC5036	PA2G4	Lymphoid	NA	NA	NA	NA	NA	NA	NA	NA	NA	NA	NA	NA	NA NA
10606_at	10606	LOC10606	PAICS	T Cell	NA	NA	NA	NA	NA	NA	NA	NA	NA	NA	NA	NA	NA NA
5062_at	5062	LOC5062	PAK2	Multiple	NA	NA	NA	NA	NA	NA	NA	NA	NA	NA	NA	NA	NA NA
167153_at	167153	LOC167153	PAPD4	Multiple	NA	NA	NA	NA	NA	NA	NA	NA	NA	NA	NA	NA	NA NA
10914_at	10914	LOC10914	PAPOLA	Lymphoid	NA	NA	NA	NA	NA	NA	NA	NA	NA	NA	NA	NA	NA NA
79668_at	79668	LOC79668	PARP8	Multiple	NA	NA	NA	NA	NA	NA	NA	NA	NA	NA	NA	NA	NA NA
64098_at	64098	LOC64098	PARVG	Multiple	NA	NA	NA	NA	NA	NA	NA	NA	NA	NA	NA	NA	NA NA
23178_at	23178	LOC23178	PASK	Lymphoid	NA	NA	NA	NA	NA	NA	NA	NA	NA	NA	NA	NA	NA NA
219988_at	219988	LOC219988	PATL1	Multiple	NA	NA	NA	NA	NA	NA	NA	NA	NA	NA	NA	NA	NA NA
197135_at	197135	LOC197135	PATL2	Lymphoid	NA	NA	NA	NA	NA	NA	NA	NA	NA	NA	NA	NA	NA NA
5079_at	5079	LOC5079	PAX5	B Cell	NA	NA	NA	NA	NA	NA	NA	NA	NA	NA	NA	NA	NA NA
91523_at	91523	LOC91523	PCED1B	Lymphoid	NA	NA	NA	NA	NA	NA	NA	NA	NA	NA	NA	NA	NA NA
5111_at	5111	LOC5111	PCNA	Lymphoid	NA	NA	NA	NA	NA	NA	NA	NA	NA	NA	NA	NA	NA NA
9601_at	9601	LOC9601	PDIA4	B Cell	NA	NA	NA	NA	NA	NA	NA	NA	NA	NA	NA	NA	NA NA
8566_at	8566	LOC8566	PDXK	Multiple	NA	NA	NA	NA	NA	NA	NA	NA	NA	NA	NA	NA	NA NA
5226_at	5226	LOC5226	PGD	Myeloid	NA	NA	NA	NA	NA	NA	NA	NA	NA	NA	NA	NA	NA NA
221692_at	221692	LOC221692	PHACTR1	Monocyte	NA	NA	NA	NA	NA	NA	NA	NA	NA	NA	NA	NA	NA NA
1912_at	1912	LOC1912	PHC2	Neutrophil	NA	NA	NA	NA	NA	NA	NA	NA	NA	NA	NA	NA	NA NA
26147_at	26147	LOC26147	PHF19	Lymphoid	NA	NA	NA	NA	NA	NA	NA	NA	NA	NA	NA	NA	NA NA
5266_at	5266	LOC5266	PI3	Multiple	NA	NA	NA	NA	NA	NA	NA	NA	NA	NA	NA	NA	NA NA
55361_at	55361	LOC55361	PI4K2A	Myeloid	NA	NA	NA	NA	NA	NA	NA	NA	NA	NA	NA	NA	NA NA
8554_at	8554	LOC8554	PIAS1	Multiple	NA	NA	NA	NA	NA	NA	NA	NA	NA	NA	NA	NA	NA NA
8301_at	8301	LOC8301	PICALM	Myeloid	NA	NA	NA	NA	NA	NA	NA	NA	NA	NA	NA	NA	NA NA
5293_at	5293	LOC5293	PIK3CD	Multiple	NA	NA	NA	NA	NA	NA	NA	NA	NA	NA	NA	NA	NA NA
5294_at	5294	LOC5294	PIK3CG	Multiple	NA	NA	NA	NA	NA	NA	NA	NA	NA	NA	NA	NA	NA NA
113791_at	113791	LOC113791	PIK3IP1	T Cell	NA	NA	NA	NA	NA	NA	NA	NA	NA	NA	NA	NA	NA NA
23533_at	23533	LOC23533	PIK3R5	Multiple	NA	NA	NA	NA	NA	NA	NA	NA	NA	NA	NA	NA	NA NA
29992_at	29992	LOC29992	PILRA	Myeloid	NA	NA	NA	NA	NA	NA	NA	NA	NA	NA	NA	NA	NA NA
5305_at	5305	LOC5305	PIP4K2A	Multiple	NA	NA	NA	NA	NA	NA	NA	NA	NA	NA	NA	NA	NA NA
23761_at	23761	LOC23761	PISD	Myeloid	NA	NA	NA	NA	NA	NA	NA	NA	NA	NA	NA	NA	NA NA
5306_at	5306	LOC5306	PITPNA	Myeloid	NA	NA	NA	NA	NA	NA	NA	NA	NA	NA	NA	NA	NA NA
7941_at	7941	LOC7941	PLA2G7	Myeloid	NA	NA	NA	NA	NA	NA	NA	NA	NA	NA	NA	NA	NA NA
79887_at	79887	LOC79887	PLBD1	Myeloid	NA	NA	NA	NA	NA	NA	NA	NA	NA	NA	NA	NA	NA NA
5336_at	5336	LOC5336	PLCG2	Multiple	NA	NA	NA	NA	NA	NA	NA	NA	NA	NA	NA	NA	NA NA
5337_at	5337	LOC5337	PLD1	Monocyte	NA	NA	NA	NA	NA	NA	NA	NA	NA	NA	NA	NA	NA NA
55041_at	55041	LOC55041	PLEKHB2	Myeloid	NA	NA	NA	NA	NA	NA	NA	NA	NA	NA	NA	NA	NA NA
84898_at	84898	LOC84898	PLXDC2	Myeloid	NA	NA	NA	NA	NA	NA	NA	NA	NA	NA	NA	NA	NA NA
10154_at	10154	LOC10154	PLXNC1	Multiple	NA	NA	NA	NA	NA	NA	NA	NA	NA	NA	NA	NA	NA NA
5366_at	5366	LOC5366	PMAIP1	Multiple	NA	NA	NA	NA	NA	NA	NA	NA	NA	NA	NA	NA	NA NA
5378_at	5378	LOC5378	PMS1	Multiple	NA	NA	NA	NA	NA	NA	NA	NA	NA	NA	NA	NA	NA NA
56902_at	56902	LOC56902	PNO1	Lymphoid	NA	NA	NA	NA	NA	NA	NA	NA	NA	NA	NA	NA	NA NA
5368_at	5368	LOC5368	PNOC	B Cell	NA	NA	NA	NA	NA	NA	NA	NA	NA	NA	NA	NA	NA NA
50640_at	50640	LOC50640	PNPLA8	Monocyte	NA	NA	NA	NA	NA	NA	NA	NA	NA	NA	NA	NA	NA NA
56983_at	56983	LOC56983	POGLUT1	Dendritic Cell	NA	NA	NA	NA	NA	NA	NA	NA	NA	NA	NA	NA	NA NA
54107_at	54107	LOC54107	POLE3	Multiple	NA	NA	NA	NA	NA	NA	NA	NA	NA	NA	NA	NA	NA NA
84172_at	84172	LOC84172	POLR1B	Lymphoid	NA	NA	NA	NA	NA	NA	NA	NA	NA	NA	NA	NA	NA NA
5450_at	5450	LOC5450	POU2AF1	B Cell	NA	NA	NA	NA	NA	NA	NA	NA	NA	NA	NA	NA	NA NA
84513_at	84513	LOC84513	PPAPDC1B	B Cell	NA	NA	NA	NA	NA	NA	NA	NA	NA	NA	NA	NA	NA NA
51535_at	51535	LOC51535	PPHLN1	Multiple	NA	NA	NA	NA	NA	NA	NA	NA	NA	NA	NA	NA	NA NA
10105_at	10105	LOC10105	PPIF	Monocyte	NA	NA	NA	NA	NA	NA	NA	NA	NA	NA	NA	NA	NA NA
9647_at	9647	LOC9647	PPM1F	Myeloid	NA	NA	NA	NA	NA	NA	NA	NA	NA	NA	NA	NA	NA NA
132160_at	132160	LOC132160	PPM1M	Multiple	NA	NA	NA	NA	NA	NA	NA	NA	NA	NA	NA	NA	NA NA
170954_at	170954	LOC170954	PPP1R18	Multiple	NA	NA	NA	NA	NA	NA	NA	NA	NA	NA	NA	NA	NA NA
5504_at	5504	LOC5504	PPP1R2	Lymphoid	NA	NA	NA	NA	NA	NA	NA	NA	NA	NA	NA	NA	NA NA
5538_at	5538	LOC5538	PPT1	Myeloid	NA	NA	NA	NA	NA	NA	NA	NA	NA	NA	NA	NA	NA NA
130814_at	130814	LOC130814	PQLC3	Myeloid	NA	NA	NA	NA	NA	NA	NA	NA	NA	NA	NA	NA	NA NA
9055_at	9055	LOC9055	PRC1	T Cell	NA	NA	NA	NA	NA	NA	NA	NA	NA	NA	NA	NA	NA NA
639_at	639	LOC639	PRDM1	Multiple	NA	NA	NA	NA	NA	NA	NA	NA	NA	NA	NA	NA	NA NA
7799_at	7799	LOC7799	PRDM2	Lymphoid	NA	NA	NA	NA	NA	NA	NA	NA	NA	NA	NA	NA	NA NA
57580_at	57580	LOC57580	PREX1	Multiple	NA	NA	NA	NA	NA	NA	NA	NA	NA	NA	NA	NA	NA NA
5553_at	5553	LOC5553	PRG2	Multiple	NA	NA	NA	NA	NA	NA	NA	NA	NA	NA	NA	NA	NA NA
144165_at	144165	LOC144165	PRICKLE1	Multiple	NA	NA	NA	NA	NA	NA	NA	NA	NA	NA	NA	NA	NA NA
5583_at	5583	LOC5583	PRKCH	Lymphoid	NA	NA	NA	NA	NA	NA	NA	NA	NA	NA	NA	NA	NA NA
5588_at	5588	LOC5588	PRKCQ	Lymphoid	NA	NA	NA	NA	NA	NA	NA	NA	NA	NA	NA	NA	NA NA
5613_at	5613	LOC5613	PRKX	Lymphoid	NA	NA	NA	NA	NA	NA	NA	NA	NA	NA	NA	NA	NA NA
3275_at	3275	LOC3275	PRMT2	Multiple	NA	NA	NA	NA	NA	NA	NA	NA	NA	NA	NA	NA	NA NA
60675_at	60675	LOC60675	PROK2	Neutrophil	NA	NA	NA	NA	NA	NA	NA	NA	NA	NA	NA	NA	NA NA
55119_at	55119	LOC55119	PRPF38B	Multiple	NA	NA	NA	NA	NA	NA	NA	NA	NA	NA	NA	NA	NA NA
55660_at	55660	LOC55660	PRPF40A	Multiple	NA	NA	NA	NA	NA	NA	NA	NA	NA	NA	NA	NA	NA NA
55771_at	55771	LOC55771	PRR11	T Cell	NA	NA	NA	NA	NA	NA	NA	NA	NA	NA	NA	NA	NA NA
23215_at	23215	LOC23215	PRRC2C	Multiple	NA	NA	NA	NA	NA	NA	NA	NA	NA	NA	NA	NA	NA NA
79056_at	79056	LOC79056	PRRG4	Myeloid	NA	NA	NA	NA	NA	NA	NA	NA	NA	NA	NA	NA	NA NA
5644_at	5644	LOC5644	PRSS1	Lymphoid	NA	NA	NA	NA	NA	NA	NA	NA	NA	NA	NA	NA	NA NA
5717_at	5717	LOC5717	PSMD11	Multiple	NA	NA	NA	NA	NA	NA	NA	NA	NA	NA	NA	NA	NA NA
5724_at	5724	LOC5724	PTAFR	Myeloid	NA	NA	NA	NA	NA	NA	NA	NA	NA	NA	NA	NA	NA NA
9991_at	9991	LOC9991	PTBP3	Multiple	NA	NA	NA	NA	NA	NA	NA	NA	NA	NA	NA	NA	NA NA
5728_at	5728	LOC5728	PTEN	Myeloid	NA	NA	NA	NA	NA	NA	NA	NA	NA	NA	NA	NA	NA NA
5729_at	5729	LOC5729	PTGDR	NK Cell	NA	NA	NA	NA	NA	NA	NA	NA	NA	NA	NA	NA	NA NA
5732_at	5732	LOC5732	PTGER2	Multiple	NA	NA	NA	NA	NA	NA	NA	NA	NA	NA	NA	NA	NA NA
8073_at	8073	LOC8073	PTP4A2	Multiple	NA	NA	NA	NA	NA	NA	NA	NA	NA	NA	NA	NA	NA NA
26191_at	26191	LOC26191	PTPN22	Multiple	NA	NA	NA	NA	NA	NA	NA	NA	NA	NA	NA	NA	NA NA
5775_at	5775	LOC5775	PTPN4	Lymphoid	NA	NA	NA	NA	NA	NA	NA	NA	NA	NA	NA	NA	NA NA
5778_at	5778	LOC5778	PTPN7	Lymphoid	NA	NA	NA	NA	NA	NA	NA	NA	NA	NA	NA	NA	NA NA
5788_at	5788	LOC5788	PTPRC	Multiple	NA	NA	NA	NA	NA	NA	NA	NA	NA	NA	NA	NA	NA NA
5790_at	5790	LOC5790	PTPRCAP	Lymphoid	NA	NA	NA	NA	NA	NA	NA	NA	NA	NA	NA	NA	NA NA
5791_at	5791	LOC5791	PTPRE	Myeloid	NA	NA	NA	NA	NA	NA	NA	NA	NA	NA	NA	NA	NA NA
5795_at	5795	LOC5795	PTPRJ	Multiple	NA	NA	NA	NA	NA	NA	NA	NA	NA	NA	NA	NA	NA NA
5800_at	5800	LOC5800	PTPRO	Myeloid	NA	NA	NA	NA	NA	NA	NA	NA	NA	NA	NA	NA	NA NA
9232_at	9232	LOC9232	PTTG1	Lymphoid	NA	NA	NA	NA	NA	NA	NA	NA	NA	NA	NA	NA	NA NA
5806_at	5806	LOC5806	PTX3	Monocyte	NA	NA	NA	NA	NA	NA	NA	NA	NA	NA	NA	NA	NA NA
5819_at	5819	LOC5819	PVRL2	Dendritic Cell	NA	NA	NA	NA	NA	NA	NA	NA	NA	NA	NA	NA	NA NA
81607_at	81607	LOC81607	PVRL4	Multiple	NA	NA	NA	NA	NA	NA	NA	NA	NA	NA	NA	NA	NA NA
5829_at	5829	LOC5829	PXN	Multiple	NA	NA	NA	NA	NA	NA	NA	NA	NA	NA	NA	NA	NA NA
25797_at	25797	LOC25797	QPCT	Multiple	NA	NA	NA	NA	NA	NA	NA	NA	NA	NA	NA	NA	NA NA
79832_at	79832	LOC79832	QSER1	Multiple	NA	NA	NA	NA	NA	NA	NA	NA	NA	NA	NA	NA	NA NA
91300_at	91300	LOC91300	R3HDM4	Neutrophil	NA	NA	NA	NA	NA	NA	NA	NA	NA	NA	NA	NA	NA NA
10890_at	10890	LOC10890	RAB10	Myeloid	NA	NA	NA	NA	NA	NA	NA	NA	NA	NA	NA	NA	NA NA
80223_at	80223	LOC80223	RAB11FIP1	Multiple	NA	NA	NA	NA	NA	NA	NA	NA	NA	NA	NA	NA	NA NA
53917_at	53917	LOC53917	RAB24	Multiple	NA	NA	NA	NA	NA	NA	NA	NA	NA	NA	NA	NA	NA NA
27314_at	27314	LOC27314	RAB30	Dendritic Cell	NA	NA	NA	NA	NA	NA	NA	NA	NA	NA	NA	NA	NA NA
326624_at	326624	LOC326624	RAB37	Multiple	NA	NA	NA	NA	NA	NA	NA	NA	NA	NA	NA	NA	NA NA
51762_at	51762	LOC51762	RAB8B	Multiple	NA	NA	NA	NA	NA	NA	NA	NA	NA	NA	NA	NA	NA NA
9367_at	9367	LOC9367	RAB9A	Dendritic Cell	NA	NA	NA	NA	NA	NA	NA	NA	NA	NA	NA	NA	NA NA
29127_at	29127	LOC29127	RACGAP1	Lymphoid	NA	NA	NA	NA	NA	NA	NA	NA	NA	NA	NA	NA	NA NA
5898_at	5898	LOC5898	RALA	Multiple	NA	NA	NA	NA	NA	NA	NA	NA	NA	NA	NA	NA	NA NA
5899_at	5899	LOC5899	RALB	Neutrophil	NA	NA	NA	NA	NA	NA	NA	NA	NA	NA	NA	NA	NA NA
55103_at	55103	LOC55103	RALGPS2	B Cell	NA	NA	NA	NA	NA	NA	NA	NA	NA	NA	NA	NA	NA NA
5906_at	5906	LOC5906	RAP1A	Multiple	NA	NA	NA	NA	NA	NA	NA	NA	NA	NA	NA	NA	NA NA
5912_at	5912	LOC5912	RAP2B	Multiple	NA	NA	NA	NA	NA	NA	NA	NA	NA	NA	NA	NA	NA NA
57826_at	57826	LOC57826	RAP2C	Multiple	NA	NA	NA	NA	NA	NA	NA	NA	NA	NA	NA	NA	NA NA
2889_at	2889	LOC2889	RAPGEF1	Multiple	NA	NA	NA	NA	NA	NA	NA	NA	NA	NA	NA	NA	NA NA
5914_at	5914	LOC5914	RARA	Myeloid	NA	NA	NA	NA	NA	NA	NA	NA	NA	NA	NA	NA	NA NA
5922_at	5922	LOC5922	RASA2	Lymphoid	NA	NA	NA	NA	NA	NA	NA	NA	NA	NA	NA	NA	NA NA
9462_at	9462	LOC9462	RASAL2	Myeloid	NA	NA	NA	NA	NA	NA	NA	NA	NA	NA	NA	NA	NA NA
64926_at	64926	LOC64926	RASAL3	Lymphoid	NA	NA	NA	NA	NA	NA	NA	NA	NA	NA	NA	NA	NA NA
10125_at	10125	LOC10125	RASGRP1	Multiple	NA	NA	NA	NA	NA	NA	NA	NA	NA	NA	NA	NA	NA NA
10235_at	10235	LOC10235	RASGRP2	Lymphoid	NA	NA	NA	NA	NA	NA	NA	NA	NA	NA	NA	NA	NA NA
25780_at	25780	LOC25780	RASGRP3	Multiple	NA	NA	NA	NA	NA	NA	NA	NA	NA	NA	NA	NA	NA NA
115727_at	115727	LOC115727	RASGRP4	Myeloid	NA	NA	NA	NA	NA	NA	NA	NA	NA	NA	NA	NA	NA NA
9770_at	9770	LOC9770	RASSF2	Myeloid	NA	NA	NA	NA	NA	NA	NA	NA	NA	NA	NA	NA	NA NA
283349_at	283349	LOC283349	RASSF3	Myeloid	NA	NA	NA	NA	NA	NA	NA	NA	NA	NA	NA	NA	NA NA
83937_at	83937	LOC83937	RASSF4	Dendritic Cell	NA	NA	NA	NA	NA	NA	NA	NA	NA	NA	NA	NA	NA NA
83593_at	83593	LOC83593	RASSF5	Multiple	NA	NA	NA	NA	NA	NA	NA	NA	NA	NA	NA	NA	NA NA
5928_at	5928	LOC5928	RBBP4	Multiple	NA	NA	NA	NA	NA	NA	NA	NA	NA	NA	NA	NA	NA NA
5934_at	5934	LOC5934	RBL2	Multiple	NA	NA	NA	NA	NA	NA	NA	NA	NA	NA	NA	NA	NA NA
84991_at	84991	LOC84991	RBM17	Multiple	NA	NA	NA	NA	NA	NA	NA	NA	NA	NA	NA	NA	NA NA
55696_at	55696	LOC55696	RBM22	Multiple	NA	NA	NA	NA	NA	NA	NA	NA	NA	NA	NA	NA	NA NA
9584_at	9584	LOC9584	RBM39	Multiple	NA	NA	NA	NA	NA	NA	NA	NA	NA	NA	NA	NA	NA NA
5937_at	5937	LOC5937	RBMS1	Multiple	NA	NA	NA	NA	NA	NA	NA	NA	NA	NA	NA	NA	NA NA
1102_at	1102	LOC1102	RCBTB2	Myeloid	NA	NA	NA	NA	NA	NA	NA	NA	NA	NA	NA	NA	NA NA
92241_at	92241	LOC92241	RCSD1	Multiple	NA	NA	NA	NA	NA	NA	NA	NA	NA	NA	NA	NA	NA NA
5962_at	5962	LOC5962	RDX	Myeloid	NA	NA	NA	NA	NA	NA	NA	NA	NA	NA	NA	NA	NA NA
5966_at	5966	LOC5966	REL	Myeloid	NA	NA	NA	NA	NA	NA	NA	NA	NA	NA	NA	NA	NA NA
5971_at	5971	LOC5971	RELB	Multiple	NA	NA	NA	NA	NA	NA	NA	NA	NA	NA	NA	NA	NA NA
84957_at	84957	LOC84957	RELT	Myeloid	NA	NA	NA	NA	NA	NA	NA	NA	NA	NA	NA	NA	NA NA
5984_at	5984	LOC5984	RFC4	Lymphoid	NA	NA	NA	NA	NA	NA	NA	NA	NA	NA	NA	NA	NA NA
23180_at	23180	LOC23180	RFTN1	Multiple	NA	NA	NA	NA	NA	NA	NA	NA	NA	NA	NA	NA	NA NA
64326_at	64326	LOC64326	RFWD2	Myeloid	NA	NA	NA	NA	NA	NA	NA	NA	NA	NA	NA	NA	NA NA
64864_at	64864	LOC64864	RFX7	Lymphoid	NA	NA	NA	NA	NA	NA	NA	NA	NA	NA	NA	NA	NA NA
266747_at	266747	LOC266747	RGL4	Multiple	NA	NA	NA	NA	NA	NA	NA	NA	NA	NA	NA	NA	NA NA
5996_at	5996	LOC5996	RGS1	Multiple	NA	NA	NA	NA	NA	NA	NA	NA	NA	NA	NA	NA	NA NA
64407_at	64407	LOC64407	RGS18	Myeloid	NA	NA	NA	NA	NA	NA	NA	NA	NA	NA	NA	NA	NA NA
10287_at	10287	LOC10287	RGS19	Multiple	NA	NA	NA	NA	NA	NA	NA	NA	NA	NA	NA	NA	NA NA
84236_at	84236	LOC84236	RHBDD1	Multiple	NA	NA	NA	NA	NA	NA	NA	NA	NA	NA	NA	NA	NA NA
391_at	391	LOC391	RHOG	Myeloid	NA	NA	NA	NA	NA	NA	NA	NA	NA	NA	NA	NA	NA NA
399_at	399	LOC399	RHOH	Multiple	NA	NA	NA	NA	NA	NA	NA	NA	NA	NA	NA	NA	NA NA
253260_at	253260	LOC253260	RICTOR	Multiple	NA	NA	NA	NA	NA	NA	NA	NA	NA	NA	NA	NA	NA NA
55183_at	55183	LOC55183	RIF1	Multiple	NA	NA	NA	NA	NA	NA	NA	NA	NA	NA	NA	NA	NA NA
196383_at	196383	LOC196383	RILPL2	Myeloid	NA	NA	NA	NA	NA	NA	NA	NA	NA	NA	NA	NA	NA NA
79890_at	79890	LOC79890	RIN3	Multiple	NA	NA	NA	NA	NA	NA	NA	NA	NA	NA	NA	NA	NA NA
83732_at	83732	LOC83732	RIOK1	Lymphoid	NA	NA	NA	NA	NA	NA	NA	NA	NA	NA	NA	NA	NA NA
6016_at	6016	LOC6016	RIT1	Myeloid	NA	NA	NA	NA	NA	NA	NA	NA	NA	NA	NA	NA	NA NA
117579_at	117579	LOC117579	RLN3	Multiple	NA	NA	NA	NA	NA	NA	NA	NA	NA	NA	NA	NA	NA NA
6036_at	6036	LOC6036	RNASE2	Myeloid	NA	NA	NA	NA	NA	NA	NA	NA	NA	NA	NA	NA	NA NA
6039_at	6039	LOC6039	RNASE6	Multiple	NA	NA	NA	NA	NA	NA	NA	NA	NA	NA	NA	NA	NA NA
8635_at	8635	LOC8635	RNASET2	Multiple	NA	NA	NA	NA	NA	NA	NA	NA	NA	NA	NA	NA	NA NA
11342_at	11342	LOC11342	RNF13	Myeloid	NA	NA	NA	NA	NA	NA	NA	NA	NA	NA	NA	NA	NA NA
50862_at	50862	LOC50862	RNF141	Neutrophil	NA	NA	NA	NA	NA	NA	NA	NA	NA	NA	NA	NA	NA NA
284996_at	284996	LOC284996	RNF149	Myeloid	NA	NA	NA	NA	NA	NA	NA	NA	NA	NA	NA	NA	NA NA
115992_at	115992	LOC115992	RNF166	Multiple	NA	NA	NA	NA	NA	NA	NA	NA	NA	NA	NA	NA	NA NA
127544_at	127544	LOC127544	RNF19B	Myeloid	NA	NA	NA	NA	NA	NA	NA	NA	NA	NA	NA	NA	NA NA
11237_at	11237	LOC11237	RNF24	Myeloid	NA	NA	NA	NA	NA	NA	NA	NA	NA	NA	NA	NA	NA NA
6095_at	6095	LOC6095	RORA	Lymphoid	NA	NA	NA	NA	NA	NA	NA	NA	NA	NA	NA	NA	NA NA
6119_at	6119	LOC6119	RPA3	Lymphoid	NA	NA	NA	NA	NA	NA	NA	NA	NA	NA	NA	NA	NA NA
22934_at	22934	LOC22934	RPIA	Lymphoid	NA	NA	NA	NA	NA	NA	NA	NA	NA	NA	NA	NA	NA NA
6184_at	6184	LOC6184	RPN1	B Cell	NA	NA	NA	NA	NA	NA	NA	NA	NA	NA	NA	NA	NA NA
51065_at	51065	LOC51065	RPS27L	Myeloid	NA	NA	NA	NA	NA	NA	NA	NA	NA	NA	NA	NA	NA NA
64121_at	64121	LOC64121	RRAGC	Myeloid	NA	NA	NA	NA	NA	NA	NA	NA	NA	NA	NA	NA	NA NA
6240_at	6240	LOC6240	RRM1	T Cell	NA	NA	NA	NA	NA	NA	NA	NA	NA	NA	NA	NA	NA NA
6241_at	6241	LOC6241	RRM2	Lymphoid	NA	NA	NA	NA	NA	NA	NA	NA	NA	NA	NA	NA	NA NA
23076_at	23076	LOC23076	RRP1B	Multiple	NA	NA	NA	NA	NA	NA	NA	NA	NA	NA	NA	NA	NA NA
860_at	860	LOC860	RUNX2	Multiple	NA	NA	NA	NA	NA	NA	NA	NA	NA	NA	NA	NA	NA NA
864_at	864	LOC864	RUNX3	Multiple	NA	NA	NA	NA	NA	NA	NA	NA	NA	NA	NA	NA	NA NA
23429_at	23429	LOC23429	RYBP	Multiple	NA	NA	NA	NA	NA	NA	NA	NA	NA	NA	NA	NA	NA NA
6283_at	6283	LOC6283	S100A12	Myeloid	NA	NA	NA	NA	NA	NA	NA	NA	NA	NA	NA	NA	NA NA
6280_at	6280	LOC6280	S100A9	Myeloid	NA	NA	NA	NA	NA	NA	NA	NA	NA	NA	NA	NA	NA NA
8698_at	8698	LOC8698	S1PR4	Multiple	NA	NA	NA	NA	NA	NA	NA	NA	NA	NA	NA	NA	NA NA
53637_at	53637	LOC53637	S1PR5	Lymphoid	NA	NA	NA	NA	NA	NA	NA	NA	NA	NA	NA	NA	NA NA
154075_at	154075	LOC154075	SAMD3	Lymphoid	NA	NA	NA	NA	NA	NA	NA	NA	NA	NA	NA	NA	NA NA
9733_at	9733	LOC9733	SART3	Multiple	NA	NA	NA	NA	NA	NA	NA	NA	NA	NA	NA	NA	NA NA
54440_at	54440	LOC54440	SASH3	Multiple	NA	NA	NA	NA	NA	NA	NA	NA	NA	NA	NA	NA	NA NA
9169_at	9169	LOC9169	SCAF11	Multiple	NA	NA	NA	NA	NA	NA	NA	NA	NA	NA	NA	NA	NA NA
79966_at	79966	LOC79966	SCD5	Multiple	NA	NA	NA	NA	NA	NA	NA	NA	NA	NA	NA	NA	NA NA
23256_at	23256	LOC23256	SCFD1	B Cell	NA	NA	NA	NA	NA	NA	NA	NA	NA	NA	NA	NA	NA NA
9997_at	9997	LOC9997	SCO2	Myeloid	NA	NA	NA	NA	NA	NA	NA	NA	NA	NA	NA	NA	NA NA
23753_at	23753	LOC23753	SDF2L1	Lymphoid	NA	NA	NA	NA	NA	NA	NA	NA	NA	NA	NA	NA	NA NA
6397_at	6397	LOC6397	SEC14L1	Neutrophil	NA	NA	NA	NA	NA	NA	NA	NA	NA	NA	NA	NA	NA NA
10802_at	10802	LOC10802	SEC24A	B Cell	NA	NA	NA	NA	NA	NA	NA	NA	NA	NA	NA	NA	NA NA
7095_at	7095	LOC7095	SEC62	B Cell	NA	NA	NA	NA	NA	NA	NA	NA	NA	NA	NA	NA	NA NA
6404_at	6404	LOC6404	SELPLG	Multiple	NA	NA	NA	NA	NA	NA	NA	NA	NA	NA	NA	NA	NA NA
10507_at	10507	LOC10507	SEMA4D	Multiple	NA	NA	NA	NA	NA	NA	NA	NA	NA	NA	NA	NA	NA NA
26135_at	26135	LOC26135	SERBP1	Lymphoid	NA	NA	NA	NA	NA	NA	NA	NA	NA	NA	NA	NA	NA NA
8710_at	8710	LOC8710	SERPINB7	Monocyte	NA	NA	NA	NA	NA	NA	NA	NA	NA	NA	NA	NA	NA NA
5272_at	5272	LOC5272	SERPINB9	Monocyte	NA	NA	NA	NA	NA	NA	NA	NA	NA	NA	NA	NA	NA NA
221756_at	221756	LOC221756	SERPINB9P	Multiple	NA	NA	NA	NA	NA	NA	NA	NA	NA	NA	NA	NA	NA NA
7536_at	7536	LOC7536	SF1	Multiple	NA	NA	NA	NA	NA	NA	NA	NA	NA	NA	NA	NA	NA NA
57713_at	57713	LOC57713	SFMBT2	Multiple	NA	NA	NA	NA	NA	NA	NA	NA	NA	NA	NA	NA	NA NA
119392_at	119392	LOC119392	SFR1	Multiple	NA	NA	NA	NA	NA	NA	NA	NA	NA	NA	NA	NA	NA NA
157285_at	157285	LOC157285	SGK223	Multiple	NA	NA	NA	NA	NA	NA	NA	NA	NA	NA	NA	NA	NA NA
151246_at	151246	LOC151246	SGOL2	Lymphoid	NA	NA	NA	NA	NA	NA	NA	NA	NA	NA	NA	NA	NA NA
130367_at	130367	LOC130367	SGPP2	Monocyte	NA	NA	NA	NA	NA	NA	NA	NA	NA	NA	NA	NA	NA NA
10019_at	10019	LOC10019	SH2B3	Multiple	NA	NA	NA	NA	NA	NA	NA	NA	NA	NA	NA	NA	NA NA
9047_at	9047	LOC9047	SH2D2A	Lymphoid	NA	NA	NA	NA	NA	NA	NA	NA	NA	NA	NA	NA	NA NA
9467_at	9467	LOC9467	SH3BP5	Multiple	NA	NA	NA	NA	NA	NA	NA	NA	NA	NA	NA	NA	NA NA
92799_at	92799	LOC92799	SHKBP1	Multiple	NA	NA	NA	NA	NA	NA	NA	NA	NA	NA	NA	NA	NA NA
6478_at	6478	LOC6478	SIAH2	Multiple	NA	NA	NA	NA	NA	NA	NA	NA	NA	NA	NA	NA	NA NA
6614_at	6614	LOC6614	SIGLEC1	Dendritic Cell	NA	NA	NA	NA	NA	NA	NA	NA	NA	NA	NA	NA	NA NA
348235_at	348235	LOC348235	SKA2	Lymphoid	NA	NA	NA	NA	NA	NA	NA	NA	NA	NA	NA	NA	NA NA
8935_at	8935	LOC8935	SKAP2	Myeloid	NA	NA	NA	NA	NA	NA	NA	NA	NA	NA	NA	NA	NA NA
6503_at	6503	LOC6503	SLA	Multiple	NA	NA	NA	NA	NA	NA	NA	NA	NA	NA	NA	NA	NA NA
6504_at	6504	LOC6504	SLAMF1	Multiple	NA	NA	NA	NA	NA	NA	NA	NA	NA	NA	NA	NA	NA NA
4891_at	4891	LOC4891	SLC11A2	Myeloid	NA	NA	NA	NA	NA	NA	NA	NA	NA	NA	NA	NA	NA NA
51296_at	51296	LOC51296	SLC15A3	Myeloid	NA	NA	NA	NA	NA	NA	NA	NA	NA	NA	NA	NA	NA NA
121260_at	121260	LOC121260	SLC15A4	Multiple	NA	NA	NA	NA	NA	NA	NA	NA	NA	NA	NA	NA	NA NA
9123_at	9123	LOC9123	SLC16A3	Myeloid	NA	NA	NA	NA	NA	NA	NA	NA	NA	NA	NA	NA	NA NA
8034_at	8034	LOC8034	SLC25A16	Multiple	NA	NA	NA	NA	NA	NA	NA	NA	NA	NA	NA	NA	NA NA
51312_at	51312	LOC51312	SLC25A37	Neutrophil	NA	NA	NA	NA	NA	NA	NA	NA	NA	NA	NA	NA	NA NA
55972_at	55972	LOC55972	SLC25A40	Multiple	NA	NA	NA	NA	NA	NA	NA	NA	NA	NA	NA	NA	NA NA
284129_at	284129	LOC284129	SLC26A11	Multiple	NA	NA	NA	NA	NA	NA	NA	NA	NA	NA	NA	NA	NA NA
11000_at	11000	LOC11000	SLC27A3	Dendritic Cell	NA	NA	NA	NA	NA	NA	NA	NA	NA	NA	NA	NA	NA NA
64078_at	64078	LOC64078	SLC28A3	Monocyte	NA	NA	NA	NA	NA	NA	NA	NA	NA	NA	NA	NA	NA NA
11182_at	11182	LOC11182	SLC2A6	Myeloid	NA	NA	NA	NA	NA	NA	NA	NA	NA	NA	NA	NA	NA NA
1317_at	1317	LOC1317	SLC31A1	Monocyte	NA	NA	NA	NA	NA	NA	NA	NA	NA	NA	NA	NA	NA NA
1318_at	1318	LOC1318	SLC31A2	Myeloid	NA	NA	NA	NA	NA	NA	NA	NA	NA	NA	NA	NA	NA NA
120103_at	120103	LOC120103	SLC36A4	Myeloid	NA	NA	NA	NA	NA	NA	NA	NA	NA	NA	NA	NA	NA NA
124565_at	124565	LOC124565	SLC38A10	Multiple	NA	NA	NA	NA	NA	NA	NA	NA	NA	NA	NA	NA	NA NA
145389_at	145389	LOC145389	SLC38A6	Myeloid	NA	NA	NA	NA	NA	NA	NA	NA	NA	NA	NA	NA	NA NA
6520_at	6520	LOC6520	SLC3A2	Monocyte	NA	NA	NA	NA	NA	NA	NA	NA	NA	NA	NA	NA	NA NA
23446_at	23446	LOC23446	SLC44A1	Multiple	NA	NA	NA	NA	NA	NA	NA	NA	NA	NA	NA	NA	NA NA
57210_at	57210	LOC57210	SLC45A4	Neutrophil	NA	NA	NA	NA	NA	NA	NA	NA	NA	NA	NA	NA	NA NA
6533_at	6533	LOC6533	SLC6A6	Myeloid	NA	NA	NA	NA	NA	NA	NA	NA	NA	NA	NA	NA	NA NA
6541_at	6541	LOC6541	SLC7A1	Multiple	NA	NA	NA	NA	NA	NA	NA	NA	NA	NA	NA	NA	NA NA
23657_at	23657	LOC23657	SLC7A11	Myeloid	NA	NA	NA	NA	NA	NA	NA	NA	NA	NA	NA	NA	NA NA
8140_at	8140	LOC8140	SLC7A5	Lymphoid	NA	NA	NA	NA	NA	NA	NA	NA	NA	NA	NA	NA	NA NA
81796_at	81796	LOC81796	SLCO5A1	Dendritic Cell	NA	NA	NA	NA	NA	NA	NA	NA	NA	NA	NA	NA	NA NA
162394_at	162394	LOC162394	SLFN5	Multiple	NA	NA	NA	NA	NA	NA	NA	NA	NA	NA	NA	NA	NA NA
64744_at	64744	LOC64744	SMAP2	Multiple	NA	NA	NA	NA	NA	NA	NA	NA	NA	NA	NA	NA	NA NA
6595_at	6595	LOC6595	SMARCA2	Multiple	NA	NA	NA	NA	NA	NA	NA	NA	NA	NA	NA	NA	NA NA
8243_at	8243	LOC8243	SMC1A	Multiple	NA	NA	NA	NA	NA	NA	NA	NA	NA	NA	NA	NA	NA NA
10592_at	10592	LOC10592	SMC2	Lymphoid	NA	NA	NA	NA	NA	NA	NA	NA	NA	NA	NA	NA	NA NA
10051_at	10051	LOC10051	SMC4	Lymphoid	NA	NA	NA	NA	NA	NA	NA	NA	NA	NA	NA	NA	NA NA
23347_at	23347	LOC23347	SMCHD1	Multiple	NA	NA	NA	NA	NA	NA	NA	NA	NA	NA	NA	NA	NA NA
140775_at	140775	LOC140775	SMCR8	Multiple	NA	NA	NA	NA	NA	NA	NA	NA	NA	NA	NA	NA	NA NA
55671_at	55671	LOC55671	SMEK1	Lymphoid	NA	NA	NA	NA	NA	NA	NA	NA	NA	NA	NA	NA	NA NA
23049_at	23049	LOC23049	SMG1	Multiple	NA	NA	NA	NA	NA	NA	NA	NA	NA	NA	NA	NA	NA NA
10285_at	10285	LOC10285	SMNDC1	Multiple	NA	NA	NA	NA	NA	NA	NA	NA	NA	NA	NA	NA	NA NA
8773_at	8773	LOC8773	SNAP23	Multiple	NA	NA	NA	NA	NA	NA	NA	NA	NA	NA	NA	NA	NA NA
29916_at	29916	LOC29916	SNX11	Myeloid	NA	NA	NA	NA	NA	NA	NA	NA	NA	NA	NA	NA	NA NA
6643_at	6643	LOC6643	SNX2	Multiple	NA	NA	NA	NA	NA	NA	NA	NA	NA	NA	NA	NA	NA NA
124460_at	124460	LOC124460	SNX20	Multiple	NA	NA	NA	NA	NA	NA	NA	NA	NA	NA	NA	NA	NA NA
51429_at	51429	LOC51429	SNX9	Monocyte	NA	NA	NA	NA	NA	NA	NA	NA	NA	NA	NA	NA	NA NA
6646_at	6646	LOC6646	SOAT1	Myeloid	NA	NA	NA	NA	NA	NA	NA	NA	NA	NA	NA	NA	NA NA
6654_at	6654	LOC6654	SOS1	Lymphoid	NA	NA	NA	NA	NA	NA	NA	NA	NA	NA	NA	NA	NA NA
6672_at	6672	LOC6672	SP100	Lymphoid	NA	NA	NA	NA	NA	NA	NA	NA	NA	NA	NA	NA	NA NA
6671_at	6671	LOC6671	SP4	Lymphoid	NA	NA	NA	NA	NA	NA	NA	NA	NA	NA	NA	NA	NA NA
65244_at	65244	LOC65244	SPATS2	B Cell	NA	NA	NA	NA	NA	NA	NA	NA	NA	NA	NA	NA	NA NA
9789_at	9789	LOC9789	SPCS2	B Cell	NA	NA	NA	NA	NA	NA	NA	NA	NA	NA	NA	NA	NA NA
60559_at	60559	LOC60559	SPCS3	Multiple	NA	NA	NA	NA	NA	NA	NA	NA	NA	NA	NA	NA	NA NA
6688_at	6688	LOC6688	SPI1	Myeloid	NA	NA	NA	NA	NA	NA	NA	NA	NA	NA	NA	NA	NA NA
6689_at	6689	LOC6689	SPIB	B Cell	NA	NA	NA	NA	NA	NA	NA	NA	NA	NA	NA	NA	NA NA
90853_at	90853	LOC90853	SPOCD1	Myeloid	NA	NA	NA	NA	NA	NA	NA	NA	NA	NA	NA	NA	NA NA
339745_at	339745	LOC339745	SPOPL	Myeloid	NA	NA	NA	NA	NA	NA	NA	NA	NA	NA	NA	NA	NA NA
161742_at	161742	LOC161742	SPRED1	Myeloid	NA	NA	NA	NA	NA	NA	NA	NA	NA	NA	NA	NA	NA NA
200734_at	200734	LOC200734	SPRED2	Dendritic Cell	NA	NA	NA	NA	NA	NA	NA	NA	NA	NA	NA	NA	NA NA
6714_at	6714	LOC6714	SRC	Monocyte	NA	NA	NA	NA	NA	NA	NA	NA	NA	NA	NA	NA	NA NA
23380_at	23380	LOC23380	SRGAP2	Dendritic Cell	NA	NA	NA	NA	NA	NA	NA	NA	NA	NA	NA	NA	NA NA
6731_at	6731	LOC6731	SRP72	Multiple	NA	NA	NA	NA	NA	NA	NA	NA	NA	NA	NA	NA	NA NA
23524_at	23524	LOC23524	SRRM2	Multiple	NA	NA	NA	NA	NA	NA	NA	NA	NA	NA	NA	NA	NA NA
6426_at	6426	LOC6426	SRSF1	Multiple	NA	NA	NA	NA	NA	NA	NA	NA	NA	NA	NA	NA	NA NA
6427_at	6427	LOC6427	SRSF2	Lymphoid	NA	NA	NA	NA	NA	NA	NA	NA	NA	NA	NA	NA	NA NA
140809_at	140809	LOC140809	SRXN1	Myeloid	NA	NA	NA	NA	NA	NA	NA	NA	NA	NA	NA	NA	NA NA
54434_at	54434	LOC54434	SSH1	Multiple	NA	NA	NA	NA	NA	NA	NA	NA	NA	NA	NA	NA	NA NA
85464_at	85464	LOC85464	SSH2	Multiple	NA	NA	NA	NA	NA	NA	NA	NA	NA	NA	NA	NA	NA NA
6745_at	6745	LOC6745	SSR1	B Cell	NA	NA	NA	NA	NA	NA	NA	NA	NA	NA	NA	NA	NA NA
6747_at	6747	LOC6747	SSR3	Multiple	NA	NA	NA	NA	NA	NA	NA	NA	NA	NA	NA	NA	NA NA
6482_at	6482	LOC6482	ST3GAL1	Myeloid	NA	NA	NA	NA	NA	NA	NA	NA	NA	NA	NA	NA	NA NA
27090_at	27090	LOC27090	ST6GALNAC4	Multiple	NA	NA	NA	NA	NA	NA	NA	NA	NA	NA	NA	NA	NA NA
23166_at	23166	LOC23166	STAB1	Myeloid	NA	NA	NA	NA	NA	NA	NA	NA	NA	NA	NA	NA	NA NA
10735_at	10735	LOC10735	STAG2	Multiple	NA	NA	NA	NA	NA	NA	NA	NA	NA	NA	NA	NA	NA NA
26228_at	26228	LOC26228	STAP1	B Cell	NA	NA	NA	NA	NA	NA	NA	NA	NA	NA	NA	NA	NA NA
6776_at	6776	LOC6776	STAT5A	Multiple	NA	NA	NA	NA	NA	NA	NA	NA	NA	NA	NA	NA	NA NA
10963_at	10963	LOC10963	STIP1	Lymphoid	NA	NA	NA	NA	NA	NA	NA	NA	NA	NA	NA	NA	NA NA
6793_at	6793	LOC6793	STK10	Multiple	NA	NA	NA	NA	NA	NA	NA	NA	NA	NA	NA	NA	NA NA
9263_at	9263	LOC9263	STK17A	Multiple	NA	NA	NA	NA	NA	NA	NA	NA	NA	NA	NA	NA	NA NA
9262_at	9262	LOC9262	STK17B	Multiple	NA	NA	NA	NA	NA	NA	NA	NA	NA	NA	NA	NA	NA NA
11329_at	11329	LOC11329	STK38	Multiple	NA	NA	NA	NA	NA	NA	NA	NA	NA	NA	NA	NA	NA NA
6789_at	6789	LOC6789	STK4	Multiple	NA	NA	NA	NA	NA	NA	NA	NA	NA	NA	NA	NA	NA NA
83931_at	83931	LOC83931	STK40	Myeloid	NA	NA	NA	NA	NA	NA	NA	NA	NA	NA	NA	NA	NA NA
3703_at	3703	LOC3703	STT3A	Lymphoid	NA	NA	NA	NA	NA	NA	NA	NA	NA	NA	NA	NA	NA NA
8676_at	8676	LOC8676	STX11	Multiple	NA	NA	NA	NA	NA	NA	NA	NA	NA	NA	NA	NA	NA NA
6809_at	6809	LOC6809	STX3	Neutrophil	NA	NA	NA	NA	NA	NA	NA	NA	NA	NA	NA	NA	NA NA
6813_at	6813	LOC6813	STXBP2	Myeloid	NA	NA	NA	NA	NA	NA	NA	NA	NA	NA	NA	NA	NA NA
10923_at	10923	LOC10923	SUB1	B Cell	NA	NA	NA	NA	NA	NA	NA	NA	NA	NA	NA	NA	NA NA
25777_at	25777	LOC25777	SUN2	Lymphoid	NA	NA	NA	NA	NA	NA	NA	NA	NA	NA	NA	NA	NA NA
11198_at	11198	LOC11198	SUPT16H	Multiple	NA	NA	NA	NA	NA	NA	NA	NA	NA	NA	NA	NA	NA NA
64420_at	64420	LOC64420	SUSD1	Multiple	NA	NA	NA	NA	NA	NA	NA	NA	NA	NA	NA	NA	NA NA
23075_at	23075	LOC23075	SWAP70	Multiple	NA	NA	NA	NA	NA	NA	NA	NA	NA	NA	NA	NA	NA NA
6850_at	6850	LOC6850	SYK	Multiple	NA	NA	NA	NA	NA	NA	NA	NA	NA	NA	NA	NA	NA NA
10492_at	10492	LOC10492	SYNCRIP	Multiple	NA	NA	NA	NA	NA	NA	NA	NA	NA	NA	NA	NA	NA NA
23224_at	23224	LOC23224	SYNE2	Lymphoid	NA	NA	NA	NA	NA	NA	NA	NA	NA	NA	NA	NA	NA NA
11276_at	11276	LOC11276	SYNRG	Lymphoid	NA	NA	NA	NA	NA	NA	NA	NA	NA	NA	NA	NA	NA NA
23208_at	23208	LOC23208	SYT11	Myeloid	NA	NA	NA	NA	NA	NA	NA	NA	NA	NA	NA	NA	NA NA
94120_at	94120	LOC94120	SYTL3	Multiple	NA	NA	NA	NA	NA	NA	NA	NA	NA	NA	NA	NA	NA NA
79101_at	79101	LOC79101	TAF1D	T Cell	NA	NA	NA	NA	NA	NA	NA	NA	NA	NA	NA	NA	NA NA
6875_at	6875	LOC6875	TAF4B	Lymphoid	NA	NA	NA	NA	NA	NA	NA	NA	NA	NA	NA	NA	NA NA
6888_at	6888	LOC6888	TALDO1	Myeloid	NA	NA	NA	NA	NA	NA	NA	NA	NA	NA	NA	NA	NA NA
57551_at	57551	LOC57551	TAOK1	Multiple	NA	NA	NA	NA	NA	NA	NA	NA	NA	NA	NA	NA	NA NA
6891_at	6891	LOC6891	TAP2	Multiple	NA	NA	NA	NA	NA	NA	NA	NA	NA	NA	NA	NA	NA NA
23435_at	23435	LOC23435	TARDBP	Multiple	NA	NA	NA	NA	NA	NA	NA	NA	NA	NA	NA	NA	NA NA
374403_at	374403	LOC374403	TBC1D10C	Multiple	NA	NA	NA	NA	NA	NA	NA	NA	NA	NA	NA	NA	NA NA
54662_at	54662	LOC54662	TBC1D13	Dendritic Cell	NA	NA	NA	NA	NA	NA	NA	NA	NA	NA	NA	NA	NA NA
6907_at	6907	LOC6907	TBL1X	Multiple	NA	NA	NA	NA	NA	NA	NA	NA	NA	NA	NA	NA	NA NA
79718_at	79718	LOC79718	TBL1XR1	Multiple	NA	NA	NA	NA	NA	NA	NA	NA	NA	NA	NA	NA	NA NA
30009_at	30009	LOC30009	TBX21	Lymphoid	NA	NA	NA	NA	NA	NA	NA	NA	NA	NA	NA	NA	NA NA
6941_at	6941	LOC6941	TCF19	Lymphoid	NA	NA	NA	NA	NA	NA	NA	NA	NA	NA	NA	NA	NA NA
6929_at	6929	LOC6929	TCF3	B Cell	NA	NA	NA	NA	NA	NA	NA	NA	NA	NA	NA	NA	NA NA
6932_at	6932	LOC6932	TCF7	T Cell	NA	NA	NA	NA	NA	NA	NA	NA	NA	NA	NA	NA	NA NA
10312_at	10312	LOC10312	TCIRG1	Monocyte	NA	NA	NA	NA	NA	NA	NA	NA	NA	NA	NA	NA	NA NA
8115_at	8115	LOC8115	TCL1A	B Cell	NA	NA	NA	NA	NA	NA	NA	NA	NA	NA	NA	NA	NA NA
28584_at	28584	LOC28584	TRBV10-2	T Cell	NA	NA	NA	NA	NA	NA	NA	NA	NA	NA	NA	NA	NA NA
28586_at	28586	LOC28586	TRBV9	T Cell	NA	NA	NA	NA	NA	NA	NA	NA	NA	NA	NA	NA	NA NA
28672_at	28672	LOC28672	TRAV12-3	T Cell	NA	NA	NA	NA	NA	NA	NA	NA	NA	NA	NA	NA	NA NA
28691_at	28691	LOC28691	TRAV2	T Cell	NA	NA	NA	NA	NA	NA	NA	NA	NA	NA	NA	NA	NA NA
28711_at	28711	LOC28711	TRAJ44	T Cell	NA	NA	NA	NA	NA	NA	NA	NA	NA	NA	NA	NA	NA NA
28714_at	28714	LOC28714	TRAJ41	T Cell	NA	NA	NA	NA	NA	NA	NA	NA	NA	NA	NA	NA	NA NA
28727_at	28727	LOC28727	TRAJ28	T Cell	NA	NA	NA	NA	NA	NA	NA	NA	NA	NA	NA	NA	NA NA
28737_at	28737	LOC28737	TRAJ18	T Cell	NA	NA	NA	NA	NA	NA	NA	NA	NA	NA	NA	NA	NA NA
6982_at	6982	LOC6982	TRGV8	T Cell	NA	NA	NA	NA	NA	NA	NA	NA	NA	NA	NA	NA	NA NA
79867_at	79867	LOC79867	TCTN2	Multiple	NA	NA	NA	NA	NA	NA	NA	NA	NA	NA	NA	NA	NA NA
55775_at	55775	LOC55775	TDP1	Multiple	NA	NA	NA	NA	NA	NA	NA	NA	NA	NA	NA	NA	NA NA
22797_at	22797	LOC22797	TFEC	Myeloid	NA	NA	NA	NA	NA	NA	NA	NA	NA	NA	NA	NA	NA NA
7980_at	7980	LOC7980	TFPI2	Monocyte	NA	NA	NA	NA	NA	NA	NA	NA	NA	NA	NA	NA	NA NA
7037_at	7037	LOC7037	TFRC	Multiple	NA	NA	NA	NA	NA	NA	NA	NA	NA	NA	NA	NA	NA NA
7040_at	7040	LOC7040	TGFB1	Multiple	NA	NA	NA	NA	NA	NA	NA	NA	NA	NA	NA	NA	NA NA
7045_at	7045	LOC7045	TGFBI	Myeloid	NA	NA	NA	NA	NA	NA	NA	NA	NA	NA	NA	NA	NA NA
7046_at	7046	LOC7046	TGFBR1	NK Cell	NA	NA	NA	NA	NA	NA	NA	NA	NA	NA	NA	NA	NA NA
10618_at	10618	LOC10618	TGOLN2	Multiple	NA	NA	NA	NA	NA	NA	NA	NA	NA	NA	NA	NA	NA NA
9473_at	9473	LOC9473	THEMIS2	Myeloid	NA	NA	NA	NA	NA	NA	NA	NA	NA	NA	NA	NA	NA NA
9967_at	9967	LOC9967	THRAP3	Multiple	NA	NA	NA	NA	NA	NA	NA	NA	NA	NA	NA	NA	NA NA
92610_at	92610	LOC92610	TIFA	Lymphoid	NA	NA	NA	NA	NA	NA	NA	NA	NA	NA	NA	NA	NA NA
7077_at	7077	LOC7077	TIMP2	Myeloid	NA	NA	NA	NA	NA	NA	NA	NA	NA	NA	NA	NA	NA NA
7084_at	7084	LOC7084	TK2	Myeloid	NA	NA	NA	NA	NA	NA	NA	NA	NA	NA	NA	NA	NA NA
7090_at	7090	LOC7090	TLE3	Multiple	NA	NA	NA	NA	NA	NA	NA	NA	NA	NA	NA	NA	NA NA
7096_at	7096	LOC7096	TLR1	Myeloid	NA	NA	NA	NA	NA	NA	NA	NA	NA	NA	NA	NA	NA NA
81793_at	81793	LOC81793	TLR10	B Cell	NA	NA	NA	NA	NA	NA	NA	NA	NA	NA	NA	NA	NA NA
7099_at	7099	LOC7099	TLR4	Myeloid	NA	NA	NA	NA	NA	NA	NA	NA	NA	NA	NA	NA	NA NA
51311_at	51311	LOC51311	TLR8	Myeloid	NA	NA	NA	NA	NA	NA	NA	NA	NA	NA	NA	NA	NA NA
83877_at	83877	LOC83877	TM2D2	Myeloid	NA	NA	NA	NA	NA	NA	NA	NA	NA	NA	NA	NA	NA NA
53346_at	53346	LOC53346	TM6SF1	Multiple	NA	NA	NA	NA	NA	NA	NA	NA	NA	NA	NA	NA	NA NA
11322_at	11322	LOC11322	TMC6	Lymphoid	NA	NA	NA	NA	NA	NA	NA	NA	NA	NA	NA	NA	NA NA
147138_at	147138	LOC147138	TMC8	Lymphoid	NA	NA	NA	NA	NA	NA	NA	NA	NA	NA	NA	NA	NA NA
51014_at	51014	LOC51014	TMED7	Myeloid	NA	NA	NA	NA	NA	NA	NA	NA	NA	NA	NA	NA	NA NA
54732_at	54732	LOC54732	TMED9	Multiple	NA	NA	NA	NA	NA	NA	NA	NA	NA	NA	NA	NA	NA NA
51524_at	51524	LOC51524	TMEM138	Myeloid	NA	NA	NA	NA	NA	NA	NA	NA	NA	NA	NA	NA	NA NA
201799_at	201799	LOC201799	TMEM154	Myeloid	NA	NA	NA	NA	NA	NA	NA	NA	NA	NA	NA	NA	NA NA
80008_at	80008	LOC80008	TMEM156	B Cell	NA	NA	NA	NA	NA	NA	NA	NA	NA	NA	NA	NA	NA NA
153339_at	153339	LOC153339	TMEM167A	Multiple	NA	NA	NA	NA	NA	NA	NA	NA	NA	NA	NA	NA	NA NA
55248_at	55248	LOC55248	TMEM206	Myeloid	NA	NA	NA	NA	NA	NA	NA	NA	NA	NA	NA	NA	NA NA
84928_at	84928	LOC84928	TMEM209	Multiple	NA	NA	NA	NA	NA	NA	NA	NA	NA	NA	NA	NA	NA NA
26175_at	26175	LOC26175	TMEM251	Myeloid	NA	NA	NA	NA	NA	NA	NA	NA	NA	NA	NA	NA	NA NA
55754_at	55754	LOC55754	TMEM30A	Multiple	NA	NA	NA	NA	NA	NA	NA	NA	NA	NA	NA	NA	NA NA
55161_at	55161	LOC55161	TMEM33	Multiple	NA	NA	NA	NA	NA	NA	NA	NA	NA	NA	NA	NA	NA NA
169200_at	169200	LOC169200	TMEM64	Lymphoid	NA	NA	NA	NA	NA	NA	NA	NA	NA	NA	NA	NA	NA NA
51669_at	51669	LOC51669	TMEM66	Multiple	NA	NA	NA	NA	NA	NA	NA	NA	NA	NA	NA	NA	NA NA
137695_at	137695	LOC137695	TMEM68	Multiple	NA	NA	NA	NA	NA	NA	NA	NA	NA	NA	NA	NA	NA NA
137835_at	137835	LOC137835	TMEM71	Multiple	NA	NA	NA	NA	NA	NA	NA	NA	NA	NA	NA	NA	NA NA
92162_at	92162	LOC92162	TMEM88	Myeloid	NA	NA	NA	NA	NA	NA	NA	NA	NA	NA	NA	NA	NA NA
126259_at	126259	LOC126259	TMIGD2	Lymphoid	NA	NA	NA	NA	NA	NA	NA	NA	NA	NA	NA	NA	NA NA
7112_at	7112	LOC7112	TMPO	Lymphoid	NA	NA	NA	NA	NA	NA	NA	NA	NA	NA	NA	NA	NA NA
25816_at	25816	LOC25816	TNFAIP8	Multiple	NA	NA	NA	NA	NA	NA	NA	NA	NA	NA	NA	NA	NA NA
8794_at	8794	LOC8794	TNFRSF10C	Neutrophil	NA	NA	NA	NA	NA	NA	NA	NA	NA	NA	NA	NA	NA NA
115650_at	115650	LOC115650	TNFRSF13C	B Cell	NA	NA	NA	NA	NA	NA	NA	NA	NA	NA	NA	NA	NA NA
608_at	608	LOC608	TNFRSF17	B Cell	NA	NA	NA	NA	NA	NA	NA	NA	NA	NA	NA	NA	NA NA
8784_at	8784	LOC8784	TNFRSF18	Lymphoid	NA	NA	NA	NA	NA	NA	NA	NA	NA	NA	NA	NA	NA NA
7133_at	7133	LOC7133	TNFRSF1B	Multiple	NA	NA	NA	NA	NA	NA	NA	NA	NA	NA	NA	NA	NA NA
7293_at	7293	LOC7293	TNFRSF4	Multiple	NA	NA	NA	NA	NA	NA	NA	NA	NA	NA	NA	NA	NA NA
3604_at	3604	LOC3604	TNFRSF9	Multiple	NA	NA	NA	NA	NA	NA	NA	NA	NA	NA	NA	NA	NA NA
10673_at	10673	LOC10673	TNFSF13B	Myeloid	NA	NA	NA	NA	NA	NA	NA	NA	NA	NA	NA	NA	NA NA
9966_at	9966	LOC9966	TNFSF15	Monocyte	NA	NA	NA	NA	NA	NA	NA	NA	NA	NA	NA	NA	NA NA
944_at	944	LOC944	TNFSF8	Multiple	NA	NA	NA	NA	NA	NA	NA	NA	NA	NA	NA	NA	NA NA
10318_at	10318	LOC10318	TNIP1	Myeloid	NA	NA	NA	NA	NA	NA	NA	NA	NA	NA	NA	NA	NA NA
79931_at	79931	LOC79931	TNIP3	Multiple	NA	NA	NA	NA	NA	NA	NA	NA	NA	NA	NA	NA	NA NA
7153_at	7153	LOC7153	TOP2A	T Cell	NA	NA	NA	NA	NA	NA	NA	NA	NA	NA	NA	NA	NA NA
64222_at	64222	LOC64222	TOR3A	Multiple	NA	NA	NA	NA	NA	NA	NA	NA	NA	NA	NA	NA	NA NA
1200_at	1200	LOC1200	TPP1	Multiple	NA	NA	NA	NA	NA	NA	NA	NA	NA	NA	NA	NA	NA NA
285386_at	285386	LOC285386	TPRG1	Multiple	NA	NA	NA	NA	NA	NA	NA	NA	NA	NA	NA	NA	NA NA
29896_at	29896	LOC29896	TRA2A	Multiple	NA	NA	NA	NA	NA	NA	NA	NA	NA	NA	NA	NA	NA NA
7185_at	7185	LOC7185	TRAF1	Myeloid	NA	NA	NA	NA	NA	NA	NA	NA	NA	NA	NA	NA	NA NA
80342_at	80342	LOC80342	TRAF3IP3	Multiple	NA	NA	NA	NA	NA	NA	NA	NA	NA	NA	NA	NA	NA NA
23471_at	23471	LOC23471	TRAM1	B Cell	NA	NA	NA	NA	NA	NA	NA	NA	NA	NA	NA	NA	NA NA
9697_at	9697	LOC9697	TRAM2	B Cell	NA	NA	NA	NA	NA	NA	NA	NA	NA	NA	NA	NA	NA NA
54210_at	54210	LOC54210	TREM1	Myeloid	NA	NA	NA	NA	NA	NA	NA	NA	NA	NA	NA	NA	NA NA
54209_at	54209	LOC54209	TREM2	Myeloid	NA	NA	NA	NA	NA	NA	NA	NA	NA	NA	NA	NA	NA NA
55809_at	55809	LOC55809	TRERF1	Multiple	NA	NA	NA	NA	NA	NA	NA	NA	NA	NA	NA	NA	NA NA
10221_at	10221	LOC10221	TRIB1	Multiple	NA	NA	NA	NA	NA	NA	NA	NA	NA	NA	NA	NA	NA NA
10475_at	10475	LOC10475	TRIM38	Multiple	NA	NA	NA	NA	NA	NA	NA	NA	NA	NA	NA	NA	NA NA
286827_at	286827	LOC286827	TRIM59	T Cell	NA	NA	NA	NA	NA	NA	NA	NA	NA	NA	NA	NA	NA NA
140691_at	140691	LOC140691	TRIM69	Multiple	NA	NA	NA	NA	NA	NA	NA	NA	NA	NA	NA	NA	NA NA
51605_at	51605	LOC51605	TRMT6	Lymphoid	NA	NA	NA	NA	NA	NA	NA	NA	NA	NA	NA	NA	NA NA
51393_at	51393	LOC51393	TRPV2	Multiple	NA	NA	NA	NA	NA	NA	NA	NA	NA	NA	NA	NA	NA NA
1831_at	1831	LOC1831	TSC22D3	Multiple	NA	NA	NA	NA	NA	NA	NA	NA	NA	NA	NA	NA	NA NA
116461_at	116461	LOC116461	TSEN15	Multiple	NA	NA	NA	NA	NA	NA	NA	NA	NA	NA	NA	NA	NA NA
79042_at	79042	LOC79042	TSEN34	Neutrophil	NA	NA	NA	NA	NA	NA	NA	NA	NA	NA	NA	NA	NA NA
283989_at	283989	LOC283989	TSEN54	Lymphoid	NA	NA	NA	NA	NA	NA	NA	NA	NA	NA	NA	NA	NA NA
94015_at	94015	LOC94015	TTYH2	Dendritic Cell	NA	NA	NA	NA	NA	NA	NA	NA	NA	NA	NA	NA	NA NA
51061_at	51061	LOC51061	TXNDC11	B Cell	NA	NA	NA	NA	NA	NA	NA	NA	NA	NA	NA	NA	NA NA
79770_at	79770	LOC79770	TXNDC15	B Cell	NA	NA	NA	NA	NA	NA	NA	NA	NA	NA	NA	NA	NA NA
7296_at	7296	LOC7296	TXNRD1	Myeloid	NA	NA	NA	NA	NA	NA	NA	NA	NA	NA	NA	NA	NA NA
1890_at	1890	LOC1890	TYMP	Myeloid	NA	NA	NA	NA	NA	NA	NA	NA	NA	NA	NA	NA	NA NA
7298_at	7298	LOC7298	TYMS	Lymphoid	NA	NA	NA	NA	NA	NA	NA	NA	NA	NA	NA	NA	NA NA
11065_at	11065	LOC11065	UBE2C	T Cell	NA	NA	NA	NA	NA	NA	NA	NA	NA	NA	NA	NA	NA NA
7321_at	7321	LOC7321	UBE2D1	Myeloid	NA	NA	NA	NA	NA	NA	NA	NA	NA	NA	NA	NA	NA NA
140739_at	140739	LOC140739	UBE2F	Myeloid	NA	NA	NA	NA	NA	NA	NA	NA	NA	NA	NA	NA	NA NA
7326_at	7326	LOC7326	UBE2G1	B Cell	NA	NA	NA	NA	NA	NA	NA	NA	NA	NA	NA	NA	NA NA
51465_at	51465	LOC51465	UBE2J1	B Cell	NA	NA	NA	NA	NA	NA	NA	NA	NA	NA	NA	NA	NA NA
29089_at	29089	LOC29089	UBE2T	T Cell	NA	NA	NA	NA	NA	NA	NA	NA	NA	NA	NA	NA	NA NA
65264_at	65264	LOC65264	UBE2Z	Multiple	NA	NA	NA	NA	NA	NA	NA	NA	NA	NA	NA	NA	NA NA
29855_at	29855	LOC29855	UBN1	Multiple	NA	NA	NA	NA	NA	NA	NA	NA	NA	NA	NA	NA	NA NA
23190_at	23190	LOC23190	UBXN4	Multiple	NA	NA	NA	NA	NA	NA	NA	NA	NA	NA	NA	NA	NA NA
7351_at	7351	LOC7351	UCP2	Multiple	NA	NA	NA	NA	NA	NA	NA	NA	NA	NA	NA	NA	NA NA
51569_at	51569	LOC51569	UFM1	B Cell	NA	NA	NA	NA	NA	NA	NA	NA	NA	NA	NA	NA	NA NA
7357_at	7357	LOC7357	UGCG	Myeloid	NA	NA	NA	NA	NA	NA	NA	NA	NA	NA	NA	NA	NA NA
127933_at	127933	LOC127933	UHMK1	Multiple	NA	NA	NA	NA	NA	NA	NA	NA	NA	NA	NA	NA	NA NA
54887_at	54887	LOC54887	UHRF1BP1	Myeloid	NA	NA	NA	NA	NA	NA	NA	NA	NA	NA	NA	NA	NA NA
81622_at	81622	LOC81622	UNC93B1	Myeloid	NA	NA	NA	NA	NA	NA	NA	NA	NA	NA	NA	NA	NA NA
8615_at	8615	LOC8615	USO1	Multiple	NA	NA	NA	NA	NA	NA	NA	NA	NA	NA	NA	NA	NA NA
7398_at	7398	LOC7398	USP1	Multiple	NA	NA	NA	NA	NA	NA	NA	NA	NA	NA	NA	NA	NA NA
9100_at	9100	LOC9100	USP10	Multiple	NA	NA	NA	NA	NA	NA	NA	NA	NA	NA	NA	NA	NA NA
9958_at	9958	LOC9958	USP15	Myeloid	NA	NA	NA	NA	NA	NA	NA	NA	NA	NA	NA	NA	NA NA
10600_at	10600	LOC10600	USP16	Multiple	NA	NA	NA	NA	NA	NA	NA	NA	NA	NA	NA	NA	NA NA
9960_at	9960	LOC9960	USP3	Multiple	NA	NA	NA	NA	NA	NA	NA	NA	NA	NA	NA	NA	NA NA
1462_at	1462	LOC1462	VCAN	Monocyte	NA	NA	NA	NA	NA	NA	NA	NA	NA	NA	NA	NA	NA NA
79609_at	79609	LOC79609	VCPKMT	B Cell	NA	NA	NA	NA	NA	NA	NA	NA	NA	NA	NA	NA	NA NA
81671_at	81671	LOC81671	VMP1	Neutrophil	NA	NA	NA	NA	NA	NA	NA	NA	NA	NA	NA	NA	NA NA
29802_at	29802	LOC29802	VPREB3	B Cell	NA	NA	NA	NA	NA	NA	NA	NA	NA	NA	NA	NA	NA NA
55048_at	55048	LOC55048	VPS37C	Myeloid	NA	NA	NA	NA	NA	NA	NA	NA	NA	NA	NA	NA	NA NA
114049_at	114049	LOC114049	WBSCR22	Lymphoid	NA	NA	NA	NA	NA	NA	NA	NA	NA	NA	NA	NA	NA NA
57590_at	57590	LOC57590	WDFY1	Myeloid	NA	NA	NA	NA	NA	NA	NA	NA	NA	NA	NA	NA	NA NA
9948_at	9948	LOC9948	WDR1	Multiple	NA	NA	NA	NA	NA	NA	NA	NA	NA	NA	NA	NA	NA NA
123720_at	123720	LOC123720	WHAMM	Multiple	NA	NA	NA	NA	NA	NA	NA	NA	NA	NA	NA	NA	NA NA
54904_at	54904	LOC54904	WHSC1L1	Multiple	NA	NA	NA	NA	NA	NA	NA	NA	NA	NA	NA	NA	NA NA
7456_at	7456	LOC7456	WIPF1	Multiple	NA	NA	NA	NA	NA	NA	NA	NA	NA	NA	NA	NA	NA NA
80326_at	80326	LOC80326	WNT10A	B Cell	NA	NA	NA	NA	NA	NA	NA	NA	NA	NA	NA	NA	NA NA
7474_at	7474	LOC7474	WNT5A	Myeloid	NA	NA	NA	NA	NA	NA	NA	NA	NA	NA	NA	NA	NA NA
9589_at	9589	LOC9589	WTAP	Myeloid	NA	NA	NA	NA	NA	NA	NA	NA	NA	NA	NA	NA	NA NA
57510_at	57510	LOC57510	XPO5	Multiple	NA	NA	NA	NA	NA	NA	NA	NA	NA	NA	NA	NA	NA NA
23214_at	23214	LOC23214	XPO6	Neutrophil	NA	NA	NA	NA	NA	NA	NA	NA	NA	NA	NA	NA	NA NA
10730_at	10730	LOC10730	YME1L1	Multiple	NA	NA	NA	NA	NA	NA	NA	NA	NA	NA	NA	NA	NA NA
29799_at	29799	LOC29799	YPEL1	NK Cell	NA	NA	NA	NA	NA	NA	NA	NA	NA	NA	NA	NA	NA NA
83719_at	83719	LOC83719	YPEL3	Neutrophil	NA	NA	NA	NA	NA	NA	NA	NA	NA	NA	NA	NA	NA NA
[truncated: 152 more rows]

## Sheet: S2 Patient_Annotation
Patient	SEX	ARM	TKI-pretreated	Response Categorization	Best Overall Response	BOR3	Tumor Burden Change (MPCT)	MPCTrank	OS	PFS	OS_SOR	PFS_SOR	IHC: CD8PERCENT baseline	IHC: CD4PERCENT Baseline	IHC: PD1PERCENT.BL	IHC: PDL1.PERCENT on FFPE and or Fresh	IHC: PDL1.PERCENT.FRESH	PDL1 category	Affymetrix data availability	Baseline Biopsy: Lesion_Code	Baseline Biopsy: Lesion_Site_Simple	Baseline Biopsy: Change	Day 28 biopsy: Lesion_Code	Day 28 Biopsy: Lesion_Site_Simple	Day 28 Biopsy: Change	Biopsy of same Lesion?	Tumor Mutation Burden	Tumor Purity_strelka	Tumor Purity_Tnsnv	Tumor Heterogeneity_strelka_cluster_count	Tumor Heterogeneity_Tnsnv_cluster_count	PBRM1 status (BMS call)	VHL status (BMS call)	SETD2 status (BMS call)	BAP1 status (BMS call)
119	1	BMS 10 mg/kg	Pretreated	20pctDec	PR	CRPR	-57.5916	10	773	414	1	0	7.44	0.07	23.38	0	NA	0	42Pairs	A	SoftTissue	-100	A	SoftTissue	-100	TRUE	51	69.5067	78.1199	2	2	Splice_Site	Nonsense_Mutation	WT	WT
20	1	BMS 10 mg/kg-N	Naive	20pctDec	CR	CRPR	-100	1	1065	1022	1	1	0.82	0.91	0.1	0	0	0	42Pairs	C	SoftTissue	-100	C	SoftTissue	-100	TRUE	43	43.3133	44.9062	2	2	Frame_Shift_Ins	Splice_Site	WT	WT
88	2	BMS 10 mg/kg	Pretreated	20pctDec	PR	CRPR	-79.8077	4	878	878	1	1	3.25	0.16	3.24	15	15	5+%	NA	A	Liver	-88.3721	A	Liver	-88.3721	TRUE	NA	NA	NA	NA	NA	NA	NA	NA	NA
34	2	BMS 2 mg/kg	Pretreated	20pctDec	PR	CRPR	-59.322	8	957	500	1	0	8.58	0.1	2.74	5	NA	5+%	42Pairs	B	Lung	-81.4815	B	Lung	-81.4815	TRUE	NA	NA	NA	NA	NA	NA	NA	NA	NA
13	2	BMS 10 mg/kg-N	Naive	Not20pct	SD	SD	0	37	1094	337	1	0	0.54	2.54	38.75	0	0	0	13Post	NoCode	Kidney	NA	A	Kidney	0	FALSE	NA	NA	NA	NA	NA	NA	NA	NA	NA
50	2	BMS 10 mg/kg-N	Naive	20pctDec	SD	SD	-67.0103	6	982	86	1	0	38.93	0.04	28.5	9	9	5+%	42Pairs	B	SoftTissue	-100	K	SoftTissue	NA	FALSE	80	51.1435	58.7872	3	3	Splice_Site	Frame_Shift_Ins	WT	WT
47	1	BMS 0.3 mg/kg	Pretreated	20pctDec	SD	SD	-43.8202	15	1003	499	1	0	8.32	1.76	2.66	0	NA	0	42Pairs	B	SoftTissue	-80.7692	B	SoftTissue	-80.7692	TRUE	NA	NA	NA	NA	NA	NA	NA	NA	NA
24	1	BMS 10 mg/kg-N	Naive	Not20pct	PD	PD	5.88235	52	62	51	0	0	9.23	2.04	0	0	0	0	NA	E	Kidney	7.22892	NA	NA	NA	FALSE	16	59.2448	19.8355	4	2	WT	WT	WT	WT
25	2	BMS 10 mg/kg-N	Naive	Not20pct	PD	PD	16.2896	67	167	39	0	0	NA	NA	NA	NA	NA	NA	42Pairs	D	Kidney	0	B	Kidney	0	FALSE	71	42.7949	45.9257	3	3	WT	Missense_Mutation	WT	WT
38	1	BMS 10 mg/kg-N	Naive	Not20pct	PD	PD	0	38	955	39	1	0	43.44	1.26	2.23	15	15	5+%	42Pairs	B	SoftTissue	-24.3902	NoCode	UNKNOWN	NA	FALSE	NA	NA	NA	NA	NA	NA	NA	NA	NA
40	1	BMS 10 mg/kg-N	Naive	Not20pct	PD	PD	7.85714	56	974	80	1	0	10.47	1.92	4.11	6	6	5+%	42Pairs	NoCode	SoftTissue	NA	NoCode	UNKNOWN	NA	FALSE	20	10.2889	13.7503	1	1	WT	WT	WT	WT
52	2	BMS 10 mg/kg-N	Naive	Not20pct	SD	SD	-4.82759	29	995	246	1	0	0.59	0.46	7.45	0	0	0	42Pairs	A	SoftTissue	-76.1905	A	SoftTissue	-76.1905	TRUE	56	48.8198	46.594	3	2	Frame_Shift_Del	Nonsense_Mutation	WT	WT
56	2	BMS 2 mg/kg	Pretreated	Not20pct	SD	SD	17.3469	70	992	81	1	0	NA	NA	NA	0	NA	0	NA	NoCode	SoftTissue	NA	NA	NA	NA	FALSE	44	54.1332	54.33	4	3	WT	Missense_Mutation	Nonsense_Mutation	WT
57	1	BMS 10 mg/kg	Pretreated	Not20pct	SD	SD	0	39	969	295	1	0	NA	NA	NA	5	NA	5+%	NA	NA	NA	NA	NoCode	Kidney	NA	FALSE	NA	NA	NA	NA	NA	NA	NA	NA	NA
94	2	BMS 10 mg/kg	Pretreated	20pctDec	SD	SD	-30.9859	18	912	463	1	0	14.79	2.32	1.48	9	9	5+%	13Post	A	LymphNode	-57.1429	A	LymphNode	-57.1429	TRUE	NA	NA	NA	NA	NA	NA	NA	NA	NA
8	1	BMS 0.3 mg/kg	Pretreated	20pctDec	PR	CRPR	-72.7273	5	1051	292	1	0	NA	NA	NA	3	NA	1to5%	NA	A	Liver	-55.7377	A	Liver	-55.7377	TRUE	9	26.0556	16.644	2	1	WT	WT	WT	WT
6	2	BMS 10 mg/kg-N	Naive	20pctDec	SD	SD	-19.0476	21	155	99	0	0	NA	NA	NA	NA	NA	NA	42Pairs	C	Pancreas	-15.1515	A	LymphNode	-14.8148	FALSE	29	21.7	11.8114	2	1	Nonsense_Mutation	WT	WT	WT
85	1	BMS 2 mg/kg	Pretreated	Not20pct	SD	SD	-11.7647	24	712	42	0	1	0.91	0	0.12	0	0	0	13Post	B	LymphNode	-48.2759	B	LymphNode	-48.2759	TRUE	29	35.3667	18.4262	2	1	WT	WT	WT	WT
32	1	BMS 10 mg/kg-N	Naive	Not20pct	SD	SD	-13.0435	22	240	213	0	1	3.56	0.13	1.07	0	0	0	NA	C	Lung	-48.1481	C	Lung	-48.1481	TRUE	54	80.9028	65.1095	5	3	WT	Frame_Shift_Del	Nonsense_Mutation	WT
83	1	BMS 0.3 mg/kg	Pretreated	Not20pct	PD	PD	24.3243	73	486	45	0	0	2.51	0	0.51	0	NA	0	42Pairs	B	SoftTissue	-45.4545	B	SoftTissue	-45.4545	TRUE	NA	NA	NA	NA	NA	NA	NA	NA	NA
58	2	BMS 2 mg/kg	Pretreated	20pctDec	PR	CRPR	-50.3497	12	988	687	1	1	7.39	0.1	0.75	99	99	5+%	NA	B	Kidney	-44.2529	B	Kidney	-44.2529	TRUE	40	62.9331	63.8203	3	3	WT	WT	WT	WT
111	1	BMS 10 mg/kg-N	Naive	Not20pct	SD	SD	-2.94118	32	834	374	1	0	2.05	0.16	10.54	0	0	0	NA	A	Kidney	-2.94118	NA	NA	NA	FALSE	NA	NA	NA	NA	NA	NA	NA	NA	NA
114	2	BMS 0.3 mg/kg	Pretreated	20pctDec	PR	CRPR	-51.3158	11	340	208	1	0	43.44	0.49	13.15	0	NA	0	13Post	B	Liver	-43.75	B	Liver	-43.75	TRUE	44	29.0286	28.7387	2	2	Frame_Shift_Del	Missense_Mutation	WT	WT
36	2	BMS 10 mg/kg-N	Naive	NE	NE	NE	NA	91	741	1	0	1	NA	NA	NA	NA	NA	NA	17Pre	D	SoftTissue	NA	NA	NA	NA	FALSE	NA	NA	NA	NA	NA	NA	NA	NA	NA
51	1	BMS 10 mg/kg-N	Naive	Not20pct	PD	PD	11.7647	63	967	39	1	0	13.07	2.94	11.39	0	NA	0	17Pre	A	Pancreas	7.14286	NA	NA	NA	FALSE	NA	NA	NA	NA	NA	NA	NA	NA	NA
43	1	BMS 10 mg/kg-N	Naive	Not20pct	PD	PD	-8.19672	28	968	44	1	0	1.44	0.39	0.07	0	0	0	13Post	B	Lung	-28.5714	B	Lung	-28.5714	TRUE	12	10.0929	11.2908	1	1	WT	WT	WT	WT
15	2	BMS 10 mg/kg-N	Naive	Not20pct	SD	SD	-9.52381	27	1013	663	0	0	0.6	0	0	0	0	0	42Pairs	A	Kidney	-25	A	Kidney	-25	TRUE	54	69.0419	64.8049	4	3	Nonsense_Mutation	Frame_Shift_Del	WT	Missense_Mutation
96	2	BMS 2 mg/kg	Pretreated	Not20pct	PD	PD	12.3894	64	582	37	1	0	0.06	0	0.06	5	5	5+%	42Pairs	A	SoftTissue	-23.0769	A	SoftTissue	-23.0769	TRUE	69	95.6551	94.6416	5	4	Frame_Shift_Del	Splice_Site	WT	WT
81	2	BMS 10 mg/kg	Pretreated	20pctDec	SD	SD	-28.125	19	912	548	1	0	NA	NA	NA	NA	NA	NA	42Pairs	A	Adrenal	-19.7368	A	Adrenal	-19.7368	TRUE	NA	NA	NA	NA	NA	NA	NA	NA	NA
49	1	BMS 10 mg/kg	Pretreated	Not20pct	SD	SD	3.33333	44	605	123	0	0	NA	NA	NA	1	NA	1to5%	42Pairs	B	Kidney	-12.5	B	Kidney	-12.5	TRUE	NA	NA	NA	NA	NA	NA	NA	NA	NA
107	1	BMS 10 mg/kg	Pretreated	Not20pct	SD	SD	1.93548	41	817	529	1	0	NA	NA	NA	1	1	1to5%	42Pairs	A	LymphNode	-8.33333	A	LymphNode	-8.33333	TRUE	NA	NA	NA	NA	NA	NA	NA	NA	NA
80	1	BMS 0.3 mg/kg	Pretreated	Not20pct	SD	SD	3.63636	46	147	82	0	0	NA	NA	NA	NA	NA	NA	13Post	C	LymphNode	10	NoCode	LymphNode	NA	FALSE	NA	NA	NA	NA	NA	NA	NA	NA	NA
21	1	BMS 10 mg/kg	Pretreated	Not20pct	SD	SD	-12.5984	23	349	43	1	1	4.57	0.18	2.81	7	7	5+%	42Pairs	A	LymphNode	-7.40741	A	LymphNode	-7.40741	TRUE	48	94.8851	66.6238	5	4	Frame_Shift_Del	Missense_Mutation	WT	Frame_Shift_Del
76	1	BMS 10 mg/kg	Pretreated	20pctDec	PR	CRPR	-58.7302	9	662	209	0	0	NA	NA	NA	1	NA	1to5%	NA	B	Lung	-76	C	Lung	-66.6667	FALSE	NA	NA	NA	NA	NA	NA	NA	NA	NA
64	1	BMS 10 mg/kg	Pretreated	Not20pct	SD	SD	2	42	766	157	0	1	9.33	0.95	0.64	0	0	0	17Pre	D	Liver	-5.55556	D	Liver	-5.55556	TRUE	31	43.1496	42.5321	3	3	Missense_Mutation	Frame_Shift_Ins	Splice_Site	WT
86	1	BMS 10 mg/kg	Pretreated	Not20pct	SD	SD	5.07246	50	464	85	0	0	13.82	0.13	4.28	0	0	0	42Pairs	C	Kidney	-4.5977	C	Kidney	-4.5977	TRUE	NA	NA	NA	NA	NA	NA	NA	NA	NA
89	1	BMS 2 mg/kg	Pretreated	20pctDec	SD	SD	-21.0526	20	293	237	0	0	12.57	0	21.09	0	NA	0	NA	NA	NA	NA	NA	NA	NA	NA	NA	NA	NA	NA	NA	NA	NA	NA	NA
117	1	BMS 10 mg/kg-N	Naive	Not20pct	SD	SD	-10.1266	25	64	38	1	1	NA	NA	NA	2	NA	1to5%	42Pairs	B	Adrenal	-4.54545	B	Adrenal	-4.54545	TRUE	41	28.8879	30.8425	2	2	Nonsense_Mutation	Frame_Shift_Ins	Missense_Mutation	WT
30	2	BMS 10 mg/kg	Pretreated	20pctDec	PR	CRPR	-36.5854	17	365	246	0	0	12.87	0	2.21	1	1	1to5%	17Pre	D	Lung	-66.6667	NA	NA	NA	FALSE	NA	NA	NA	NA	NA	NA	NA	NA	NA
17	1	BMS 10 mg/kg-N	Naive	Not20pct	SD	SD	-4.41176	30	169	169	1	0	NA	NA	NA	NA	NA	NA	42Pairs	C	SoftTissue	-4.44444	C	SoftTissue	-4.44444	TRUE	4	16.2005	22.8361	2	2	WT	WT	WT	WT
48	1	BMS 2 mg/kg	Pretreated	Not20pct	SD	SD	-2.91262	33	983	983	1	1	30.06	10.89	6.35	0	0	0	NA	A	SoftTissue	-1.40845	A	SoftTissue	-1.40845	TRUE	NA	NA	NA	NA	NA	NA	NA	NA	NA
62	2	BMS 10 mg/kg	Pretreated	Not20pct	SD	SD	4	48	106	87	1	0	NA	NA	NA	NA	NA	NA	NA	B	Adrenal	-13.0435	NA	NA	NA	FALSE	51	45.021	44.3164	3	2	Splice_Site	Missense_Mutation	WT	WT
10	2	BMS 10 mg/kg-N	Naive	Not20pct	SD	SD	0	36	1058	173	1	1	NA	NA	NA	3	NA	1to5%	42Pairs	A	LymphNode	0	A	LymphNode	0	TRUE	48	71.7501	78.2408	4	3	WT	Nonsense_Mutation	WT	WT
11	1	BMS 10 mg/kg-N	Naive	Not20pct	SD	SD	8.61244	58	1024	122	1	0	NA	NA	NA	0	NA	0	42Pairs	E	Kidney	0	E	Kidney	0	TRUE	34	78.6359	67.0399	4	4	WT	Nonsense_Mutation	WT	Frame_Shift_Del
5	2	BMS 10 mg/kg-N	Naive	Not20pct	SD	SD	0	35	492	85	0	0	9.48	1.32	2.18	0	0	0	42Pairs	B	Kidney	0	B	Kidney	0	TRUE	NA	17.0433	NA	1	NA	NA	NA	NA	NA
42	1	BMS 0.3 mg/kg	Pretreated	NE	NE	NE	NA	84	81	81	0	0	48	18.97	34.02	5	5	5+%	NA	A	Lung	NA	NA	NA	NA	FALSE	NA	NA	NA	NA	NA	NA	NA	NA	NA
75	2	BMS 2 mg/kg	Pretreated	Not20pct	SD	SD	-9.74359	26	821	295	0	1	0	0	0.43	0	0	0	42Pairs	C	Liver	0	C	Liver	0	TRUE	NA	NA	NA	NA	NA	NA	NA	NA	NA
23	1	BMS 10 mg/kg-N	Naive	Not20pct	SD	SD	-1.92308	34	149	127	1	1	5.39	0.05	14.02	0	0	0	13Post	A	LymphNode	0	A	LymphNode	0	TRUE	NA	NA	NA	NA	NA	NA	NA	NA	NA
41	1	BMS 10 mg/kg	Pretreated	Not20pct	PD	PD	9.7561	60	195	42	1	0	57.08	12.07	12.64	2	2	1to5%	42Pairs	B	SoftTissue	2.63158	B	SoftTissue	2.63158	TRUE	47	33.5831	35.3277	3	2	WT	WT	WT	WT
84	2	BMS 0.3 mg/kg	Pretreated	Not20pct	SD	SD	8.33333	57	680	88	0	0	6.9	0.34	0.97	0	0	0	17Pre	N	Kidney	NA	NA	NA	NA	FALSE	54	40.7873	40.9201	4	3	Frame_Shift_Del	Frame_Shift_Ins	WT	WT
79	2	BMS 2 mg/kg	Pretreated	Not20pct	SD	SD	8.91089	59	873	130	1	0	0.34	0	0.17	0	0	0	42Pairs	A	Kidney	5	A	Kidney	5	TRUE	38	78.7672	70.0911	4	2	WT	Nonsense_Mutation	Nonsense_Mutation	WT
72	1	BMS 10 mg/kg	Pretreated	Not20pct	PD	PD	6.41711	53	283	43	0	0	11.86	4.47	5.07	5	5	5+%	42Pairs	D	Pancreas	6.73077	D	Pancreas	6.73077	TRUE	NA	38.759	56.718	1	1	NA	NA	NA	NA
71	1	BMS 0.3 mg/kg	Pretreated	Not20pct	SD	SD	11.7647	62	954	123	1	0	NA	NA	NA	0	NA	0	42Pairs	A	SoftTissue	11.7647	A	SoftTissue	11.7647	TRUE	NA	NA	NA	NA	NA	NA	NA	NA	NA
118	1	BMS 0.3 mg/kg	Pretreated	Not20pct	PD	PD	28.8889	75	177	86	0	0	6.29	1.12	2.04	2	2	1to5%	13Post	C	LymphNode	13.6364	C	LymphNode	13.6364	TRUE	NA	NA	NA	NA	NA	NA	NA	NA	NA
26	1	BMS 2 mg/kg	Pretreated	NE	NE	NE	NA	85	33	28	0	0	NA	0	0.42	9	NA	5+%	NA	C	Liver	NA	NA	NA	NA	FALSE	22	9.64447	17.61	1	2	WT	Missense_Mutation	WT	WT
4	1	BMS 2 mg/kg	Pretreated	Not20pct	SD	SD	4.69799	49	914	220	1	0	0.85	0	0	0	0	0	NA	E	Liver	16	E	Liver	16	TRUE	NA	NA	NA	NA	NA	NA	NA	NA	NA
112	1	BMS 10 mg/kg	Pretreated	Not20pct	SD	SD	16.6667	69	772	171	0	0	NA	NA	NA	2	NA	1to5%	42Pairs	A	Lung	16.6667	A	Lung	16.6667	TRUE	NA	NA	NA	NA	NA	NA	NA	NA	NA
68	1	BMS 0.3 mg/kg	Pretreated	Not20pct	PD	PD	-3.57143	31	740	39	0	0	17.32	1.35	0.77	0	0	0	17Pre	A	Lung	-6.25	B	Lung	-16.6667	FALSE	56	28.9369	31.9441	2	2	WT	Frame_Shift_Del	Missense_Mutation	Missense_Mutation
74	1	BMS 0.3 mg/kg	Pretreated	Not20pct	SD	SD	3.68421	47	440	163	0	0	0.08	0	2.64	0	0	0	17Pre	B	Liver	16.6667	B	Liver	16.6667	TRUE	NA	NA	NA	NA	NA	NA	NA	NA	NA
1	1	BMS 10 mg/kg	Pretreated	Not20pct	PD	PD	24.3421	74	43	38	1	0	1.16	0	0.51	0	0	0	42Pairs	U	LymphNode	NA	D	SoftTissue	25	FALSE	34	44.5341	32.9334	4	2	WT	Missense_Mutation	WT	WT
54	2	BMS 0.3 mg/kg	Pretreated	Not20pct	SD	SD	7.77202	55	976	254	1	0	NA	NA	NA	5	5	5+%	42Pairs	C	SoftTissue	16.9811	C	SoftTissue	16.9811	TRUE	NA	NA	NA	NA	NA	NA	NA	NA	NA
103	1	BMS 10 mg/kg	Pretreated	Not20pct	SD	SD	3.57143	45	862	289	1	0	NA	NA	NA	NA	NA	NA	13Post	B	SoftTissue	18.1818	B	SoftTissue	18.1818	TRUE	5	10.5678	21.7309	1	1	WT	WT	WT	WT
66	1	BMS 2 mg/kg	Pretreated	Not20pct	PD	PD	37.8378	78	470	36	0	0	20.28	0.34	30.33	0	NA	0	17Pre	D	Adrenal	18.9189	D	Adrenal	18.9189	TRUE	NA	19.3572	51.7296	1	1	NA	NA	NA	NA
2	1	BMS 0.3 mg/kg	Pretreated	NE	NE	NE	NA	86	31	31	0	0	0.6	0	0.55	0	0	0	17Pre	NoCode	SoftTissue	NA	NA	NA	NA	FALSE	352	48.5641	48.1425	3	3	Frame_Shift_Del	Frame_Shift_Del	WT	WT
59	1	BMS 0.3 mg/kg	Pretreated	Not20pct	SD	SD	7.57576	54	991	81	1	0	0.29	0	5.91	16	NA	5+%	17Pre	A	LymphNode	19.0476	A	LymphNode	19.0476	TRUE	NA	NA	NA	NA	NA	NA	NA	NA	NA
93	1	BMS 10 mg/kg	Pretreated	20pctDec	PR	CRPR	-43.3476	16	684	500	0	0	21.18	7.44	30.52	1	1	1to5%	42Pairs	NoCode	Liver	NA	D	Liver	-65.7143	FALSE	50	32.4465	52.1468	3	3	Splice_Site	WT	Nonsense_Mutation	WT
98	1	BMS 0.3 mg/kg	Pretreated	Not20pct	PD	PD	-48.659	92	398	32	0	0	12.05	9.36	13.97	0	0	0	13Post	B	Liver	23.0769	B	Liver	23.0769	TRUE	NA	NA	NA	NA	NA	NA	NA	NA	NA
87	2	BMS 2 mg/kg	Pretreated	Not20pct	SD	SD	18.8235	71	350	75	1	0	NA	NA	NA	5	5	5+%	42Pairs	C	Liver	23.2558	C	Liver	23.2558	TRUE	NA	NA	NA	NA	NA	NA	NA	NA	NA
28	1	BMS 10 mg/kg-N	Naive	Not20pct	PD	PD	29.5238	76	43	43	1	0	31.54	20.07	50.87	3	3	1to5%	42Pairs	A	Liver	33.3333	A	Liver	33.3333	TRUE	9	40.5622	17.0985	2	2	WT	Missense_Mutation	WT	Nonsense_Mutation
115	1	BMS 2 mg/kg	Pretreated	Not20pct	SD	SD	15.2778	66	366	87	1	0	0.51	0.24	0.28	0	0	0	17Pre	B	LymphNode	35.1351	B	LymphNode	35.1351	TRUE	44	68.4617	68.7483	5	4	WT	WT	WT	WT
69	2	BMS 10 mg/kg	Pretreated	Not20pct	PD	PD	53.3333	80	303	37	0	0	NA	NA	NA	0	0	0	42Pairs	C	Adrenal	42.1053	C	Adrenal	42.1053	TRUE	NA	NA	NA	NA	NA	NA	NA	NA	NA
27	1	BMS 0.3 mg/kg	Pretreated	Not20pct	PD	PD	36.4865	77	968	35	1	0	1.67	0	7.08	3	3	1to5%	42Pairs	B	Liver	47.3684	B	Liver	47.3684	TRUE	15	36.2778	33.7706	1	1	WT	Nonsense_Mutation	WT	WT
18	1	BMS 0.3 mg/kg	Pretreated	Not20pct	PD	PD	64.5161	83	111	43	1	0	0.78	0	0	NA	NA	NA	NA	A	Liver	62.5	A	Liver	62.5	TRUE	44	32.3601	35.8894	3	3	WT	Missense_Mutation	Nonsense_Mutation	WT
14	1	BMS 10 mg/kg-N	Naive	20pctDec	PR	CRPR	-86.4865	2	1025	541	1	0	NA	NA	NA	0	NA	0	17Pre	C	LymphNode	NA	NA	NA	NA	FALSE	56	48.9151	39.9984	4	2	Frame_Shift_Del	WT	WT	WT
63	2	BMS 2 mg/kg	Pretreated	NE	NE	NE	NA	88	189	22	1	0	8.04	0	0.6	6	6	5+%	NA	NA	NA	NA	NA	NA	NA	NA	NA	NA	NA	NA	NA	NA	NA	NA	NA
73	1	BMS 2 mg/kg	Pretreated	Not20pct	PD	PD	11.0092	61	178	58	0	0	0.28	0	0.18	0	0	0	42Pairs	F	SoftTissue	NA	B	LymphNode	-17.3913	FALSE	24	73.3892	55.4884	4	3	WT	WT	WT	WT
3	2	BMS 10 mg/kg	Pretreated	Not20pct	PD	PD	63.6986	82	43	37	1	0	NA	NA	NA	NA	NA	NA	13Post	C	Liver	112.903	C	Liver	112.903	TRUE	NA	NA	NA	NA	NA	NA	NA	NA	NA
99	1	BMS 2 mg/kg	Pretreated	NE	NE	NE	NA	89	41	41	0	0	5.25	3.26	0.11	6	6	5+%	17Pre	M	LymphNode	NA	NA	NA	NA	FALSE	65	43.3307	22.5236	3	1	WT	Splice_Site	Missense_Mutation	Missense_Mutation
100	2	BMS 2 mg/kg	Pretreated	Not20pct	SD	SD	5.22388	51	798	184	1	1	NA	NA	NA	0	NA	0	17Pre	A	Adrenal	12.069	NA	NA	NA	FALSE	NA	12.8316	NA	1	NA	NA	NA	NA	NA
105	1	BMS 10 mg/kg	Pretreated	Not20pct	PD	PD	16.6667	68	118	45	0	0	0.13	0	0.42	0	0	0	42Pairs	K	SoftTissue	NA	C	SoftTissue	12.1212	FALSE	72	70.1224	70.0507	4	3	WT	WT	WT	WT
12	2	BMS 10 mg/kg	Pretreated	Not20pct	NE	NE	NA	90	179	1	0	1	NA	NA	NA	NA	NA	NA	13Post	K	Liver	NA	K	Liver	NA	TRUE	6	46.4646	23.4321	3	1	WT	WT	WT	WT
22	1	BMS 2 mg/kg	Pretreated	20pctDec	PR	CRPR	-48.9583	13	197	197	0	0	35.26	0	2.71	30	30	5+%	17Pre	M	SoftTissue	NA	M	SoftTissue	NA	TRUE	21	31.1453	11.1091	3	1	WT	WT	WT	WT
90	1	BMS 0.3 mg/kg	Pretreated	Not20pct	PD	PD	57.377	81	499	36	0	0	NA	0.54	3.7	85	85	5+%	42Pairs	L	SoftTissue	NA	L	SoftTissue	NA	TRUE	67	60.2317	64.6669	4	4	WT	WT	Frame_Shift_Ins	WT
106	2	BMS 2 mg/kg	Pretreated	20pctDec	PR	CRPR	-60.6667	7	870	821	1	1	1.64	0	2.43	0	NA	0	17Pre	N	SoftTissue	NA	NA	NA	NA	FALSE	36	26.6324	33.0691	1	2	Frame_Shift_Del	Frame_Shift_Del	Nonsense_Mutation	WT
77	1	BMS 0.3 mg/kg	Pretreated	Not20pct	PD	PD	0.819672	40	132	44	0	0	12.29	1.38	7.08	4	4	1to5%	42Pairs	I	SoftTissue	NA	I	SoftTissue	NA	TRUE	NA	NA	NA	NA	NA	NA	NA	NA	NA
102	1	BMS 0.3 mg/kg	Pretreated	Not20pct	SD	SD	3.0303	43	165	108	1	0	7.5	0.55	7.62	0	0	0	42Pairs	D	SoftTissue	NA	D	SoftTissue	NA	TRUE	62	44.1704	44.5756	4	3	WT	Missense_Mutation	Nonsense_Mutation	WT
95	1	BMS 2 mg/kg	Pretreated	Not20pct	PD	PD	47.0588	79	92	36	0	0	16.03	0.14	2.95	20	20	5+%	NA	K	Liver	NA	K	Liver	NA	TRUE	32	21.0746	14.2642	2	1	WT	WT	WT	WT
29	1	BMS 0.3 mg/kg	Pretreated	Not20pct	NE	NE	NA	87	937	1	1	1	NA	NA	NA	NA	NA	NA	13Post	M	SoftTissue	NA	M	SoftTissue	NA	TRUE	8	7.53282	18.4561	1	1	WT	WT	WT	WT
39	1	BMS 0.3 mg/kg	Pretreated	Not20pct	PD	PD	12.5	65	306	37	0	0	NA	NA	NA	2	2	1to5%	17Pre	M	SoftTissue	NA	M	SoftTissue	NA	TRUE	51	19.7317	16.4007	2	1	WT	WT	WT	WT
45	1	BMS 10 mg/kg-N	Naive	20pctDec	CR	CRPR	-85.7143	3	953	949	1	1	58.88	9.79	61.69	10	10	5+%	42Pairs	M	LymphNode	NA	M	LymphNode	NA	TRUE	18	15.4761	19.5433	2	2	WT	WT	WT	WT
97	1	BMS 2 mg/kg	Pretreated	Not20pct	PD	PD	22.2222	72	871	37	1	0	0.18	0.16	0.71	0	0	0	NA	NoCode	SoftTissue	NA	L	SoftTissue	NA	FALSE	44	37.2266	62.762	3	3	Nonsense_Mutation	WT	WT	WT

## Sheet: S3 311baseline
Probeset	ENTREZ	LocusLink	Symbol	IRIS_Most_Specific	p.response0	q.response0	Effect.Size	Fold.Change	Responder_Day0_GrpAvg	NonResponder_Day0_GrpAvg
6688_at	6688	LOC6688	SPI1	Myeloid	0.0099827	0.157864	0.47	1.38	4.64	4.17
23207_at	23207	LOC23207	PLEKHM2	NA	0.00985866	0.156679	0.36	1.28	4.71	4.36
10229_at	10229	LOC10229	COQ7	NA	0.00976763	0.156679	-0.5	0.71	5.58	6.08
55013_at	55013	LOC55013	CCDC109B	Multiple	0.00968779	0.156613	0.77	1.7	6.92	6.15
84450_at	84450	LOC84450	ZNF512	NA	0.00966092	0.156372	-0.36	0.78	4.92	5.28
7126_at	7126	LOC7126	TNFAIP1	NA	0.00959502	0.155691	-0.43	0.74	5.64	6.07
11262_at	11262	LOC11262	SP140	NA	0.00958192	0.155691	1.16	2.23	4.88	3.73
9046_at	9046	LOC9046	DOK2	NA	0.00950418	0.15524	0.5	1.42	4.13	3.63
53827_at	53827	LOC53827	FXYD5	Multiple	0.00949403	0.15524	0.6	1.52	8.12	7.52
7762_at	7762	LOC7762	ZNF215	NA	0.00948891	0.15524	0.4	1.32	3.22	2.82
6282_at	6282	LOC6282	S100A11	NA	0.00948293	0.15524	0.51	1.42	9.77	9.26
2000_at	2000	LOC2000	ELF4	Multiple	0.00943097	0.15524	0.47	1.39	7.3	6.83
339324_at	339324	LOC339324	ZNF260	NA	0.00943814	0.15524	-0.42	0.75	5.02	5.44
10804_at	10804	LOC10804	GJB6	NA	0.00948122	0.15524	0.9	1.87	3.03	2.13
127262_at	127262	LOC127262	TPRG1L	NA	0.00932882	0.154834	-0.33	0.8	6.2	6.53
5341_at	5341	LOC5341	PLEK	Multiple	0.00929435	0.154655	1.02	2.03	7.15	6.12
342510_at	342510	LOC342510	CD300E	NA	0.00927776	0.154576	0.38	1.3	4.1	3.72
1409_at	1409	LOC1409	CRYAA	NA	0.00919563	0.153403	0.5	1.41	3.32	2.83
23762_at	23762	LOC23762	OSBP2	NA	0.00918511	0.153403	0.34	1.27	3.36	3.02
91607_at	91607	LOC91607	SLFN11	NA	0.00914513	0.152951	0.37	1.29	6	5.63
7850_at	7850	LOC7850	IL1R2	NA	0.00913524	0.152951	1.33	2.51	6.31	4.99
84293_at	84293	LOC84293	FAM213A	NA	0.0090838	0.152316	-0.67	0.63	8.03	8.7
79037_at	79037	LOC79037	PVRIG	NA	0.00866982	0.152018	0.82	1.77	7.26	6.44
8514_at	8514	LOC8514	KCNAB2	NA	0.00892094	0.152018	0.38	1.3	3.72	3.34
64092_at	64092	LOC64092	SAMSN1	Multiple	0.0088199	0.152018	0.97	1.96	6.23	5.26
84133_at	84133	LOC84133	ZNRF3	NA	0.00871239	0.152018	-0.56	0.68	2.71	3.28
5880_at	5880	LOC5880	RAC2	Multiple	0.00895692	0.152018	1.05	2.07	6.68	5.63
374872_at	374872	LOC374872	C19ORF35	NA	0.00904277	0.152018	0.33	1.26	3.93	3.6
340543_at	340543	LOC340543	TCEAL5	NA	0.00873897	0.152018	0.52	1.44	2.77	2.25
115352_at	115352	LOC115352	FCRL3	Lymphoid	0.0086031	0.152018	0.59	1.51	3.77	3.18
4781_at	4781	LOC4781	NFIB	NA	0.00887117	0.152018	-0.92	0.53	6.39	7.31
222236_at	222236	LOC222236	NAPEPLD	NA	0.00892753	0.152018	-0.46	0.72	4.33	4.79
11030_at	11030	LOC11030	RBPMS	NA	0.00885694	0.152018	-0.66	0.63	6.49	7.14
10245_at	10245	LOC10245	TIMM17B	NA	0.00892831	0.152018	0.37	1.3	3.26	2.88
54757_at	54757	LOC54757	FAM20A	NA	0.0089832	0.152018	0.75	1.68	4.9	4.16
441239_at	441239	LOC441239	RP11-797H7.5	NA	0.00892347	0.152018	0.34	1.26	3.58	3.24
433_at	433	LOC433	ASGR2	NA	0.00884459	0.152018	0.45	1.36	3.79	3.34
8647_at	8647	LOC8647	ABCB11	NA	0.00904219	0.152018	0.33	1.26	2.41	2.08
283652_at	283652	LOC283652	SLC24A5	NA	0.0086056	0.152018	-0.71	0.61	4.56	5.26
63920_at	63920	LOC63920	C5ORF54	NA	0.00873982	0.152018	-0.54	0.69	3.54	4.08
387787_at	387787	LOC387787	LIPT2	NA	0.00889327	0.152018	-0.42	0.74	2.61	3.03
4542_at	4542	LOC4542	MYO1F	Multiple	0.00857191	0.151923	0.86	1.82	6.3	5.44
9202_at	9202	LOC9202	ZMYM4	NA	0.00849075	0.151497	-0.35	0.78	4.6	4.95
7408_at	7408	LOC7408	VASP	Multiple	0.0085207	0.151497	0.67	1.59	4.86	4.19
64112_at	64112	LOC64112	MOAP1	NA	0.00839422	0.150873	-0.55	0.68	6.53	7.08
122416_at	122416	LOC122416	ANKRD9	NA	0.00839715	0.150873	0.38	1.3	3.99	3.61
3833_at	3833	LOC3833	KIFC1	NA	0.00830212	0.150672	0.45	1.37	4.32	3.86
2124_at	2124	LOC2124	EVI2B	Multiple	0.00827235	0.150494	0.95	1.93	7.65	6.7
25937_at	25937	LOC25937	WWTR1	NA	0.00823954	0.150494	-0.51	0.7	8.56	9.07
253558_at	253558	LOC253558	LCLAT1	NA	0.00821516	0.150494	-0.5	0.71	6.3	6.8
5250_at	5250	LOC5250	SLC25A3	NA	0.00826878	0.150494	-0.35	0.78	8.72	9.07
163049_at	163049	LOC163049	ZNF791	NA	0.00823559	0.150494	-0.44	0.74	5.42	5.85
7356_at	7356	LOC7356	SCGB1A1	NA	0.00822209	0.150494	0.61	1.53	3.09	2.48
10232_at	10232	LOC10232	MSLN	NA	0.00809205	0.149504	0.33	1.26	2.6	2.27
5522_at	5522	LOC5522	PPP2R2C	NA	0.00800836	0.148378	0.51	1.42	3.34	2.83
26526_at	26526	LOC26526	TSPAN16	NA	0.00791781	0.147327	0.33	1.26	2.87	2.54
374403_at	374403	LOC374403	TBC1D10C	Multiple	0.00774089	0.145946	0.57	1.49	3.7	3.13
1964_at	1964	LOC1964	EIF1AX	NA	0.00762731	0.145946	-0.45	0.73	6.88	7.33
1522_at	1522	LOC1522	CTSZ	Myeloid	0.00764583	0.145946	0.74	1.67	8.38	7.64
386677_at	386677	LOC386677	KRTAP10-1	NA	0.00774156	0.145946	0.39	1.31	4.93	4.54
64976_at	64976	LOC64976	MRPL40	NA	0.00776446	0.145946	-0.46	0.73	7.77	8.23
3732_at	3732	LOC3732	CD82	Multiple	0.00777816	0.145946	0.52	1.43	3.65	3.14
55083_at	55083	LOC55083	KIF26B	NA	0.00763167	0.145946	0.45	1.37	3.53	3.08
26984_at	26984	LOC26984	SEC22A	NA	0.00774709	0.145946	-0.43	0.74	4.14	4.57
255043_at	255043	LOC255043	TMEM86B	NA	0.00776964	0.145946	0.39	1.31	3.28	2.89
51090_at	51090	LOC51090	PLLP	NA	0.00772165	0.145946	-1.19	0.44	3.58	4.78
27128_at	27128	LOC27128	CYTH4	Multiple	0.00738664	0.145845	0.45	1.37	3.94	3.49
4124_at	4124	LOC4124	MAN2A1	Multiple	0.00749583	0.145845	-0.46	0.73	4.81	5.26
51177_at	51177	LOC51177	PLEKHO1	NA	0.0074894	0.145845	0.61	1.53	8.81	8.2
5792_at	5792	LOC5792	PTPRF	NA	0.00756052	0.145845	-0.61	0.65	6.56	7.18
79623_at	79623	LOC79623	GALNT14	NA	0.00755567	0.145845	-1.02	0.49	6.42	7.43
49855_at	49855	LOC49855	SCAPER	NA	0.00740715	0.145845	-0.47	0.72	4.34	4.81
54972_at	54972	LOC54972	TMEM132A	NA	0.00747019	0.145845	0.37	1.29	4.28	3.92
2444_at	2444	LOC2444	FRK	NA	0.00735438	0.145551	-0.77	0.59	4.63	5.41
5292_at	5292	LOC5292	PIM1	Multiple	0.00734515	0.145551	0.85	1.8	5.67	4.82
26035_at	26035	LOC26035	GLCE	NA	0.00733137	0.145537	-0.68	0.62	5.76	6.44
59338_at	59338	LOC59338	PLEKHA1	NA	0.00726968	0.144759	-0.8	0.58	6.39	7.18
2185_at	2185	LOC2185	PTK2B	NA	0.00711968	0.143074	0.52	1.43	4.32	3.8
619279_at	619279	LOC619279	ZNF704	NA	0.00705682	0.142249	-0.65	0.64	2.87	3.51
10579_at	10579	LOC10579	TACC2	NA	0.0070197	0.142158	-0.73	0.6	3.99	4.72
10939_at	10939	LOC10939	AFG3L2	NA	0.00700332	0.142047	-0.55	0.68	5.69	6.23
27202_at	27202	LOC27202	C5AR2	NA	0.00698718	0.142047	0.35	1.27	3.79	3.44
131118_at	131118	LOC131118	DNAJC19	NA	0.00686628	0.141261	-0.65	0.64	6.59	7.24
3601_at	3601	LOC3601	IL15RA	NA	0.00677848	0.140989	0.63	1.55	5.78	5.15
653712_at	653712	LOC653712	RP11-723O4.2	NA	0.00674713	0.140561	0.35	1.28	3.58	3.23
54072_at	54072	LOC54072	LINC00158	Monocyte	0.00672404	0.140358	0.46	1.37	2.74	2.28
619189_at	619189	LOC619189	SERINC4	NA	0.00672662	0.140358	-0.33	0.79	3.75	4.09
677832_at	677832	LOC677832	SNORA53	NA	0.00662672	0.140252	0.34	1.27	3.52	3.18
9641_at	9641	LOC9641	IKBKE	NA	0.00656735	0.139933	0.45	1.37	3.96	3.51
10990_at	10990	LOC10990	LILRB5	NA	0.00648271	0.139089	0.45	1.37	4.05	3.59
84747_at	84747	LOC84747	UNC119B	NA	0.00649082	0.139089	-0.7	0.62	6.26	6.96
79940_at	79940	LOC79940	LINC00472	NA	0.00648821	0.139089	-1.03	0.49	3.44	4.47
503542_at	503542	LOC503542	SPRN	NA	0.0064403	0.139089	0.34	1.27	3.45	3.11
5824_at	5824	LOC5824	PEX19	NA	0.00636888	0.138191	-0.47	0.72	5.7	6.17
84263_at	84263	LOC84263	HSDL2	NA	0.006343	0.138191	-0.55	0.68	6.02	6.57
100287902_at	100287902	LOC100287902	LGALS8-AS1	NA	0.0063503	0.138191	0.33	1.25	2.7	2.37
84340_at	84340	LOC84340	GFM2	NA	0.00625757	0.137837	-0.49	0.71	5.03	5.52
79415_at	79415	LOC79415	C17ORF62	Multiple	0.00611615	0.137493	0.46	1.37	6.21	5.76
150771_at	150771	LOC150771	ITPRIPL1	NA	0.00623142	0.137493	0.37	1.29	3.12	2.75
222487_at	222487	LOC222487	GPR97	NA	0.00609307	0.137493	0.48	1.39	3.77	3.3
25975_at	25975	LOC25975	EGFL6	NA	0.00622532	0.137493	0.66	1.58	3.28	2.62
64398_at	64398	LOC64398	MPP5	NA	0.00616714	0.137493	-0.46	0.73	6.24	6.7
256309_at	256309	LOC256309	CCDC110	NA	0.00622297	0.137493	-0.67	0.63	1.9	2.57
4616_at	4616	LOC4616	GADD45B	NA	0.00611088	0.137493	0.69	1.61	7.07	6.38
94009_at	94009	LOC94009	SERHL	NA	0.00600233	0.137493	-0.93	0.53	3.31	4.23
121512_at	121512	LOC121512	FGD4	NA	0.0062202	0.137493	-0.53	0.69	5.04	5.57
56288_at	56288	LOC56288	PARD3	NA	0.00586592	0.136146	-0.41	0.75	4.97	5.38
8976_at	8976	LOC8976	WASL	NA	0.00578682	0.136146	-0.44	0.73	5.5	5.95
752_at	752	LOC752	FMNL1	Multiple	0.00567363	0.136146	0.69	1.61	3.87	3.19
1874_at	1874	LOC1874	E2F4	NA	0.00588897	0.136146	0.33	1.26	5.34	5.01
392490_at	392490	LOC392490	FLJ44635	NA	0.00582588	0.136146	0.35	1.27	3.26	2.91
11037_at	11037	LOC11037	STON1	NA	0.00588784	0.136146	-0.76	0.59	4.22	4.97
100288637_at	100288637	LOC100288637	NA	NA	0.00573186	0.136146	0.43	1.35	5.69	5.25
26273_at	26273	LOC26273	FBXO3	NA	0.00577401	0.136146	-0.52	0.7	4.72	5.24
94121_at	94121	LOC94121	SYTL4	NA	0.00560072	0.135573	0.36	1.28	5.05	4.69
117144_at	117144	LOC117144	CATSPER1	NA	0.00557353	0.135573	0.63	1.54	3.98	3.35
84941_at	84941	LOC84941	HSH2D	NA	0.00552718	0.135454	0.46	1.37	4.31	3.85
7381_at	7381	LOC7381	UQCRB	NA	0.00547741	0.135249	-0.51	0.7	5.91	6.42
83707_at	83707	LOC83707	TRPT1	NA	0.00540352	0.133931	0.42	1.33	5.93	5.51
84216_at	84216	LOC84216	TMEM117	NA	0.00529447	0.132232	0.38	1.3	3.83	3.45
9414_at	9414	LOC9414	TJP2	NA	0.00524848	0.131586	-0.58	0.67	5.41	5.99
916_at	916	LOC916	CD3E	T Cell	0.00523	0.131375	1.43	2.7	6.1	4.67
5900_at	5900	LOC5900	RALGDS	NA	0.00520631	0.131032	0.46	1.37	4.75	4.29
4650_at	4650	LOC4650	MYO9B	NA	0.00509682	0.130107	0.42	1.33	3.64	3.22
79896_at	79896	LOC79896	THNSL1	NA	0.00512547	0.130107	-0.44	0.74	3.3	3.74
220441_at	220441	LOC220441	RNF152	NA	0.00512491	0.130107	-1.18	0.44	3.4	4.58
4050_at	4050	LOC4050	LTB	Multiple	0.00501867	0.129811	0.72	1.64	5.02	4.3
348093_at	348093	LOC348093	RBPMS2	NA	0.00499718	0.129743	-1	0.5	3.52	4.52
60672_at	60672	LOC60672	MIIP	NA	0.00493152	0.12935	0.4	1.32	5.16	4.76
22903_at	22903	LOC22903	BTBD3	NA	0.00490003	0.129303	-0.69	0.62	5.01	5.7
10299_at	10299	LOC10299	2020-03-06	NA	0.00481619	0.128126	-0.51	0.7	8.45	8.96
79718_at	79718	LOC79718	TBL1XR1	Multiple	0.00471776	0.126498	-0.42	0.75	8.23	8.65
285533_at	285533	LOC285533	RNF175	NA	0.0047453	0.126498	0.49	1.41	2.85	2.36
4588_at	4588	LOC4588	MUC6	NA	0.00473419	0.126498	0.35	1.27	3.78	3.43
9267_at	9267	LOC9267	CYTH1	Multiple	0.00466434	0.125881	0.5	1.41	5.62	5.12
10947_at	10947	LOC10947	AP3M2	NA	0.00454052	0.124585	-0.45	0.73	4.15	4.6
115362_at	115362	LOC115362	GBP5	Multiple	0.00444875	0.123802	1.44	2.71	7.15	5.71
23059_at	23059	LOC23059	CLUAP1	NA	0.00427362	0.121883	-0.4	0.76	5.18	5.58
1675_at	1675	LOC1675	CFD	NA	0.00422061	0.120635	0.84	1.79	4.19	3.35
440068_at	440068	LOC440068	CARD17	NA	0.00406158	0.120289	0.4	1.32	3.06	2.66
26270_at	26270	LOC26270	FBXO6	Multiple	0.00415121	0.120289	0.53	1.44	3.44	2.91
25831_at	25831	LOC25831	HECTD1	NA	0.00416788	0.120289	-0.5	0.71	6.43	6.92
10538_at	10538	LOC10538	BATF	Lymphoid	0.00394641	0.119828	0.84	1.8	4.79	3.94
4437_at	4437	LOC4437	MSH3	NA	0.00389965	0.119572	-0.44	0.74	5.11	5.54
7586_at	7586	LOC7586	ZKSCAN1	NA	0.0038658	0.118858	-0.45	0.73	5.57	6.02
55327_at	55327	LOC55327	LIN7C	NA	0.00383381	0.118858	-0.47	0.72	7.04	7.5
58485_at	58485	LOC58485	TRAPPC1	NA	0.0038573	0.118858	0.37	1.29	8.34	7.98
7535_at	7535	LOC7535	ZAP70	Lymphoid	0.00379956	0.118693	0.36	1.28	3.63	3.27
157695_at	157695	LOC157695	TDRP	NA	0.00379363	0.118693	-0.85	0.55	4.9	5.76
2121_at	2121	LOC2121	EVC	NA	0.00376693	0.118279	0.34	1.27	3.7	3.36
9217_at	9217	LOC9217	VAPB	NA	0.00374232	0.118074	-0.4	0.76	6.49	6.89
5968_at	5968	LOC5968	REG1B	NA	0.00370145	0.117637	0.5	1.41	2.99	2.49
7559_at	7559	LOC7559	ZNF12	NA	0.00367585	0.117395	-0.35	0.78	6.78	7.13
4818_at	4818	LOC4818	NKG7	Lymphoid	0.00362208	0.116246	1.06	2.08	6.89	5.83
94039_at	94039	LOC94039	ZNF101	Lymphoid	0.00358356	0.116221	0.73	1.66	5.4	4.67
351_at	351	LOC351	APP	NA	0.00357901	0.116221	-0.43	0.74	10.09	10.52
394_at	394	LOC394	ARHGAP5	NA	0.00358572	0.116221	-0.52	0.7	5.05	5.57
284186_at	284186	LOC284186	TMEM105	NA	0.00355048	0.115942	0.32	1.25	3.12	2.79
53838_at	53838	LOC53838	C11ORF24	NA	0.00352026	0.115533	0.33	1.26	5.3	4.97
677681_at	677681	LOC677681	SCARNA20	NA	0.00349029	0.115128	0.42	1.33	2.77	2.35
84106_at	84106	LOC84106	PRAM1	Monocyte	0.00348592	0.115128	0.6	1.51	4.21	3.62
255743_at	255743	LOC255743	NPNT	NA	0.00344628	0.115077	-1.43	0.37	4.2	5.63
653_at	653	LOC653	BMP5	NA	0.00342941	0.115077	0.38	1.3	2.64	2.26
54532_at	54532	LOC54532	USP53	NA	0.00334529	0.114389	-0.43	0.74	4.48	4.91
10024_at	10024	LOC10024	TROAP	NA	0.00334289	0.114389	0.33	1.26	3.41	3.08
9212_at	9212	LOC9212	AURKB	NA	0.00323879	0.111919	0.36	1.29	4.75	4.39
147744_at	147744	LOC147744	TMEM190	NA	0.00321492	0.111389	0.33	1.26	3.83	3.5
8483_at	8483	LOC8483	CILP	NA	0.00315446	0.110132	1.24	2.36	4.16	2.92
386682_at	386682	LOC386682	KRTAP10-3	NA	0.00316177	0.110132	0.39	1.31	4.15	3.77
79956_at	79956	LOC79956	ERMP1	NA	0.00309969	0.109762	-0.59	0.66	5.84	6.44
117289_at	117289	LOC117289	TAGAP	NA	0.0030611	0.109529	0.88	1.84	4.87	3.99
51008_at	51008	LOC51008	ASCC1	NA	0.00306768	0.109529	-0.45	0.73	6.15	6.6
255374_at	255374	LOC255374	MBLAC1	NA	0.00306899	0.109529	-0.6	0.66	3.83	4.44
57509_at	57509	LOC57509	MTUS1	NA	0.00306069	0.109529	-0.9	0.54	5.31	6.21
9051_at	9051	LOC9051	PSTPIP1	NA	0.00298519	0.109093	0.62	1.53	3.99	3.37
91768_at	91768	LOC91768	CABLES1	NA	0.00294009	0.108486	-0.76	0.59	4.14	4.9
9666_at	9666	LOC9666	DZIP3	NA	0.00289383	0.107691	-0.65	0.64	4.32	4.96
8355_at	8355	LOC8355	HIST1H3G	NA	0.00286625	0.10697	0.71	1.64	4.12	3.41
1979_at	1979	LOC1979	EIF4EBP2	NA	0.00283215	0.106	-0.45	0.73	7.49	7.95
23548_at	23548	LOC23548	TTC33	NA	0.00281337	0.105904	-0.45	0.73	3.87	4.32
11160_at	11160	LOC11160	ERLIN2	NA	0.0027264	0.105484	-0.51	0.7	4.61	5.12
7454_at	7454	LOC7454	WAS	Multiple	0.00261718	0.103865	0.68	1.61	5.06	4.38
9958_at	9958	LOC9958	USP15	Myeloid	0.00263288	0.103865	0.48	1.39	6.79	6.32
728310_at	728310	LOC728310	GOLGA6L7P	NA	0.0026638	0.103865	0.41	1.33	4.58	4.18
5193_at	5193	LOC5193	PEX12	NA	0.00259411	0.103307	-0.49	0.71	4.3	4.79
2585_at	2585	LOC2585	GALK2	NA	0.00253572	0.101601	-0.54	0.69	5.06	5.6
1796_at	1796	LOC1796	DOK1	NA	0.00245271	0.0988817	0.41	1.33	4.11	3.71
285343_at	285343	LOC285343	TCAIM	NA	0.00245102	0.0988817	-0.44	0.74	4.68	5.12
1_at	1	LOC1	A1BG	NA	0.00243988	0.0988817	0.36	1.28	2.7	2.34
347148_at	347148	LOC347148	QRFP	NA	0.00238178	0.0981709	0.39	1.31	3.11	2.72
22882_at	22882	LOC22882	ZHX2	NA	0.00240232	0.0981709	-0.55	0.68	9.06	9.6
8484_at	8484	LOC8484	GALR3	NA	0.00222523	0.0962659	0.33	1.26	3.21	2.88
153090_at	153090	LOC153090	DAB2IP	NA	0.002227	0.0962659	-0.66	0.63	4.92	5.59
6303_at	6303	LOC6303	SAT1	NA	0.00219569	0.0961138	0.55	1.47	9.93	9.38
28988_at	28988	LOC28988	DBNL	NA	0.0022001	0.0961138	0.42	1.34	5.93	5.51
79827_at	79827	LOC79827	CLMP	NA	0.00216259	0.0957769	0.98	1.97	4.55	3.58
284751_at	284751	LOC284751	RP11-290F20.1	NA	0.00215354	0.0957769	0.41	1.33	4.05	3.64
3002_at	3002	LOC3002	GZMB	Lymphoid	0.00202783	0.0942627	1.49	2.81	5.91	4.42
10152_at	10152	LOC10152	ABI2	NA	0.00201076	0.0942627	-0.43	0.74	6.28	6.7
677815_at	677815	LOC677815	SNORA34	NA	0.00201795	0.0942627	0.61	1.53	5.21	4.59
84961_at	84961	LOC84961	FBXL20	NA	0.00199094	0.0942242	-0.41	0.75	4.92	5.33
64333_at	64333	LOC64333	ARHGAP9	Multiple	0.00194812	0.0935536	0.76	1.7	4.56	3.8
3659_at	3659	LOC3659	IRF1	Multiple	0.00188143	0.091803	0.78	1.72	5.72	4.94
100131390_at	100131390	LOC100131390	SP9	NA	0.00188747	0.091803	0.33	1.26	4.25	3.92
84516_at	84516	LOC84516	DCTN5	NA	0.00189058	0.091803	-0.42	0.75	5.66	6.09
1741_at	1741	LOC1741	DLG3	NA	0.00180633	0.0913241	-0.56	0.68	5.4	5.95
643664_at	643664	LOC643664	SLC35G6	NA	0.00185275	0.0913241	0.36	1.28	3.42	3.07
10589_at	10589	LOC10589	DRAP1	NA	0.00183049	0.0913241	0.52	1.44	6.87	6.35
54800_at	54800	LOC54800	KLHL24	NA	0.00180874	0.0913241	-0.42	0.75	7.93	8.36
997_at	997	LOC997	CDC34	NA	0.00177758	0.0913241	0.44	1.36	4.48	4.04
1521_at	1521	LOC1521	CTSW	Lymphoid	0.00172842	0.0902709	0.84	1.79	4.57	3.73
4090_at	4090	LOC4090	SMAD5	NA	0.00174624	0.0902709	-0.62	0.65	5.48	6.1
25813_at	25813	LOC25813	SAMM50	NA	0.00174845	0.0902709	-0.54	0.69	5.51	6.05
2634_at	2634	LOC2634	GBP2	Multiple	0.00169654	0.0897184	0.58	1.5	9.68	9.1
1084_at	1084	LOC1084	CEACAM3	NA	0.00167501	0.0893348	0.33	1.26	4.07	3.74
23331_at	23331	LOC23331	TTC28	NA	0.0016454	0.0890987	-0.78	0.58	5.08	5.86
9945_at	9945	LOC9945	GFPT2	NA	0.00161289	0.0881497	0.86	1.82	5.72	4.86
1355_at	1355	LOC1355	COX15	NA	0.00155029	0.0860261	-0.4	0.76	5.85	6.25
79180_at	79180	LOC79180	EFHD2	Multiple	0.00153371	0.0859808	0.74	1.67	5.98	5.24
51194_at	51194	LOC51194	IPO11 || IPO11-LRRC70	NA	0.00152495	0.0858585	-0.55	0.68	5.73	6.28
51411_at	51411	LOC51411	BIN2	Multiple	0.00147898	0.0841476	1.15	2.22	6.3	5.15
6754_at	6754	LOC6754	SSTR4	NA	0.00148168	0.0841476	0.38	1.3	3.87	3.49
9804_at	9804	LOC9804	TOMM20	NA	0.00145267	0.08359	-0.49	0.71	7.9	8.39
84967_at	84967	LOC84967	LSM10	NA	0.00137221	0.0829175	0.52	1.43	5.27	4.75
100131211_at	100131211	LOC100131211	TMEM194B	NA	0.00135875	0.0829175	-0.37	0.77	4.56	4.93
4488_at	4488	LOC4488	MSX2	NA	0.00132921	0.0829175	0.48	1.4	3.52	3.04
23107_at	23107	LOC23107	MRPS27	NA	0.00141427	0.0829175	-0.52	0.7	5.31	5.83
147920_at	147920	LOC147920	IGFL2	NA	0.00133811	0.0829175	0.76	1.69	3.74	2.98
6098_at	6098	LOC6098	ROS1	NA	0.00142194	0.0829175	0.46	1.38	2.82	2.35
3742_at	3742	LOC3742	KCNA6	NA	0.00128404	0.0826223	0.35	1.27	3.94	3.59
9910_at	9910	LOC9910	RABGAP1L	NA	0.00117911	0.0776639	0.74	1.67	7.65	6.91
254102_at	254102	LOC254102	EHBP1L1	NA	0.00108309	0.0776639	0.61	1.52	4.21	3.6
10128_at	10128	LOC10128	LRPPRC	NA	0.00106524	0.0776639	-0.53	0.69	6.26	6.79
64651_at	64651	LOC64651	CSRNP1	NA	0.00115334	0.0776639	0.39	1.31	5.34	4.95
22898_at	22898	LOC22898	DENND3	NA	0.00115544	0.0776639	0.55	1.46	4.32	3.77
2323_at	2323	LOC2323	FLT3LG	NA	0.00105992	0.0776639	0.41	1.33	4.29	3.88
9522_at	9522	LOC9522	SCAMP1	NA	0.00116046	0.0776639	-0.36	0.78	7.17	7.53
6725_at	6725	LOC6725	SRMS	NA	0.00115713	0.0776639	0.35	1.27	2.91	2.56
151306_at	151306	LOC151306	GPBAR1	NA	0.00107818	0.0776639	0.49	1.4	4.3	3.82
23248_at	23248	LOC23248	RPRD2	NA	0.000980072	0.0771195	-0.57	0.68	5.68	6.24
117581_at	117581	LOC117581	TWIST2	NA	0.000970578	0.0768353	0.47	1.38	4.27	3.8
9976_at	9976	LOC9976	CLEC2B	Multiple	0.000938528	0.075674	0.97	1.95	8.14	7.17
63924_at	63924	LOC63924	CIDEC	NA	0.000915451	0.0752059	0.4	1.32	2.89	2.49
259290_at	259290	LOC259290	TAS2R31	NA	0.000896064	0.0745511	0.4	1.32	3.22	2.82
338692_at	338692	LOC338692	ANKRD13D	NA	0.000854153	0.0739099	0.39	1.31	4.5	4.12
2036_at	2036	LOC2036	EPB41L1	NA	0.000854408	0.0739099	-1	0.5	5.9	6.9
55196_at	55196	LOC55196	KIAA1551	NA	0.000793589	0.0729726	0.74	1.67	7.87	7.13
27319_at	27319	LOC27319	BHLHE22	NA	0.000832399	0.0729726	0.42	1.33	3.13	2.72
3751_at	3751	LOC3751	KCND2	NA	0.000823108	0.0729726	0.55	1.46	2.93	2.39
3037_at	3037	LOC3037	HAS2	NA	0.00079141	0.0729726	0.68	1.6	3.64	2.97
3744_at	3744	LOC3744	KCNA10	NA	0.000801613	0.0729726	0.32	1.25	3.2	2.88
399833_at	399833	LOC399833	SPRNP1	NA	0.000820016	0.0729726	0.36	1.28	3.02	2.66
27123_at	27123	LOC27123	DKK2	NA	0.000782988	0.0729726	0.7	1.62	3.6	2.91
80714_at	80714	LOC80714	PBX4	NA	0.000760261	0.0724864	0.51	1.43	3.84	3.32
126567_at	126567	LOC126567	C2CD4C	NA	0.000755252	0.0724864	0.42	1.34	3.36	2.93
256130_at	256130	LOC256130	TMEM196	NA	0.000704047	0.0696694	0.35	1.27	2.51	2.16
924_at	924	LOC924	CD7	Lymphoid	0.000599999	0.0680456	0.46	1.37	3.68	3.22
23616_at	23616	LOC23616	SH3BP1	NA	0.000535136	0.0680456	0.54	1.45	4.25	3.71
145508_at	145508	LOC145508	CEP128	NA	0.000595015	0.0680456	0.64	1.56	4.52	3.88
177_at	177	LOC177	AGER	NA	0.000612783	0.0680456	0.36	1.29	3.45	3.09
9447_at	9447	LOC9447	AIM2	Lymphoid	0.000486717	0.0680456	1.94	3.82	6.62	4.68
343930_at	343930	LOC343930	MSGN1	NA	0.000579512	0.0680456	0.33	1.26	3.07	2.74
6146_at	6146	LOC6146	RPL22	NA	0.000447423	0.0680456	-0.6	0.66	8.05	8.65
150864_at	150864	LOC150864	FAM117B	NA	0.000508571	0.0680456	-0.67	0.63	4.94	5.61
389763_at	389763	LOC389763	SPATA31D1	NA	0.000603214	0.0680456	0.33	1.26	3.06	2.72
8328_at	8328	LOC8328	GFI1B	NA	0.000528856	0.0680456	0.37	1.29	3.07	2.71
3783_at	3783	LOC3783	KCNN4	NA	0.000453519	0.0680456	0.57	1.49	3.91	3.34
55149_at	55149	LOC55149	MTPAP	Multiple	0.000627336	0.0680456	-0.52	0.7	3.91	4.42
5068_at	5068	LOC5068	REG3A	NA	0.000511408	0.0680456	0.43	1.35	2.96	2.53
144455_at	144455	LOC144455	E2F7	NA	0.00060632	0.0680456	0.66	1.58	3.2	2.54
90204_at	90204	LOC90204	ZSWIM1	NA	0.00049795	0.0680456	0.33	1.26	2.87	2.54
284207_at	284207	LOC284207	METRNL	NA	0.000642659	0.0680456	0.46	1.37	3.8	3.35
6954_at	6954	LOC6954	TCP11	NA	0.000500883	0.0680456	0.39	1.31	3.76	3.37
100134259_at	100134259	LOC100134259	LINC01119	NA	0.000625649	0.0680456	0.32	1.25	3.08	2.76
150677_at	150677	LOC150677	OTOS	NA	0.000614992	0.0680456	0.36	1.28	3.44	3.08
339390_at	339390	LOC339390	CLEC4G	NA	0.000637875	0.0680456	0.32	1.25	2.85	2.52
120796_at	120796	LOC120796	OR56A1	NA	0.000432027	0.0679903	0.38	1.3	4.1	3.72
58499_at	58499	LOC58499	ZNF462	NA	0.000404504	0.0674007	-0.95	0.52	5.89	6.85
23547_at	23547	LOC23547	LILRA4	NA	0.00040177	0.0674007	0.4	1.32	3.21	2.8
54471_at	54471	LOC54471	MIEF1	NA	0.000410552	0.0674007	-0.41	0.75	4.51	4.92
342977_at	342977	LOC342977	NANOS3	NA	0.000396627	0.0674007	0.32	1.25	3.21	2.89
164668_at	164668	LOC164668	APOBEC3H	NA	0.000373208	0.0665268	0.36	1.28	3.81	3.44
81029_at	81029	LOC81029	WNT5B	NA	0.000381404	0.0665268	0.37	1.29	3.17	2.8
3552_at	3552	LOC3552	IL1A	Monocyte	0.000381983	0.0665268	0.56	1.48	2.91	2.34
4277_at	4277	LOC4277	MICB	NA	0.000321554	0.0608721	0.47	1.38	3.96	3.49
642968_at	642968	LOC642968	FAM163B	NA	0.000315427	0.0608721	0.33	1.26	2.73	2.4
8471_at	8471	LOC8471	IRS4	NA	0.00026598	0.0569552	0.51	1.43	2.6	2.09
196051_at	196051	LOC196051	PPAPDC1A	NA	0.000201087	0.0523588	0.71	1.64	2.96	2.24
51520_at	51520	LOC51520	LARS	NA	0.000220464	0.0523588	-0.47	0.72	6.16	6.63
80726_at	80726	LOC80726	KIAA1683	NA	0.000217967	0.0523588	0.35	1.27	4.13	3.78
388015_at	388015	LOC388015	RTL1	NA	0.000195172	0.0520277	0.34	1.26	3.09	2.75
4595_at	4595	LOC4595	MUTYH	NA	0.000171	0.0518326	0.35	1.28	3.53	3.18
128272_at	128272	LOC128272	ARHGEF19	NA	0.000141249	0.0498653	0.39	1.31	4.4	4.01
254013_at	254013	LOC254013	METTL20	NA	0.000117399	0.045452	-0.74	0.6	3.69	4.43
686_at	686	LOC686	BTD	NA	0.000105266	0.0434365	-0.71	0.61	3.99	4.7
2662_at	2662	LOC2662	GDF10	NA	9.97246e-05	0.0434365	0.35	1.27	2.53	2.18
28952_at	28952	LOC28952	CCDC22	NA	8.79954e-05	0.0432735	0.46	1.37	4.7	4.24
26231_at	26231	LOC26231	LRRC29	NA	4.34623e-05	0.0330103	0.47	1.39	4.18	3.71
64005_at	64005	LOC64005	MYO1G	Multiple	5.55979e-05	0.0330103	0.38	1.3	2.93	2.55
64648_at	NA	NA	SPANXD || SPANXE	NA	5.13918e-05	0.0330103	0.38	1.3	2.94	2.56
8277_at	8277	LOC8277	TKTL1	NA	4.21036e-05	0.0330103	0.55	1.47	2.79	2.24
6496_at	6496	LOC6496	SIX3	NA	5.00022e-05	0.0330103	0.38	1.3	2.68	2.3
143678_at	143678	LOC143678	C11ORF94	NA	2.49371e-05	0.0271443	0.36	1.28	2.35	1.99
84330_at	84330	LOC84330	ZNF414	NA	1.51102e-05	0.0246714	0.41	1.33	3.31	2.9
2825_at	2825	LOC2825	GPR1	NA	1.12776e-05	0.0215333	0.4	1.32	2.72	2.32
5179_at	5179	LOC5179	PENK	NA	1.15397e-05	0.0215333	0.63	1.54	2.69	2.06
219790_at	219790	LOC219790	RTKN2	NA	6.04892e-06	0.0189372	0.41	1.33	2.45	2.03
399949_at	399949	LOC399949	C11ORF88	NA	7.24889e-06	0.0189372	0.4	1.32	2.52	2.12
11174_at	11174	LOC11174	ADAMTS6	NA	1.69594e-06	0.00738419	0.34	1.26	2.59	2.25
84203_at	84203	LOC84203	TXNDC2	NA	5.21975e-07	0.00340906	0.67	1.59	4.2	3.54
4314_at	4314	LOC4314	MMP3	NA	4.97409e-07	0.00340906	1.74	3.33	3.92	2.19

## Sheet: S4 Ascierto 
LocusLink	Symbol	Azscierto class	CM9 class	Studies match direction?	CM9: Probe Set	CM9: p.response0	CM9 DIFF in means at Screen	CM9 FOLD_Response Groups at Screen
LOC2674	GFRA1	DOWN25	down	downdown	59084_at	0.0111	-1.03	-2
LOC84516	DCTN5	DOWN224	down	downdown	79623_at	0.00756	-1.02	-2
LOC80176	SPSB1	DOWN25	down	downdown	3773_at	0.269	-0.907	-1.9
LOC80344	DCAF11	DOWN224	down	downdown	23321_at	0.0163	-0.853	-1.8
LOC5770	PTPN1	DOWN224	down	downdown	5274_at	0.227	-0.691	-1.6
LOC51071	DERA	DOWN224	down	downdown	5627_at	0.0675	-0.684	-1.6
LOC283345	RPL13P5	DOWN224	down	downdown	26035_at	0.00733	-0.682	-1.6
LOC59343	SENP2	DOWN224	down	downdown	84293_at	0.00908	-0.668	-1.6
LOC1368	CPM	DOWN224	down	downdown	9053_at	0.215	-0.661	-1.6
LOC404281	YY2	DOWN224	down	downdown	25874_at	0.0265	-0.615	-1.5
LOC1803	DPP4	DOWN224	down	downdown	1429_at	0.123	-0.589	-1.5
LOC89885	FATE1	DOWN224	down	downdown	135932_at	0.315	-0.578	-1.5
LOC54103	GSAP	DOWN224	down	downdown	64087_at	0.0268	-0.563	-1.5
LOC9655	SOCS5	DOWN224	down	downdown	23588_at	0.0312	-0.559	-1.5
LOC4052	LTBP1	UP224	down	updown	2674_at	0.634	-0.558	-1.5
LOC51128	SAR1B	DOWN224	down	downdown	6584_at	0.0874	-0.555	-1.5
LOC28232	SLCO3A1	DOWN25	down	downdown	8644_at	0.184	-0.491	-1.4
LOC51102	MECR	DOWN224	down	downdown	51390_at	0.106	-0.485	-1.4
LOC152137	CCDC50	DOWN224	down	downdown	22949_at	0.261	-0.48	-1.4
LOC63908	NAPB	DOWN224	down	downdown	51008_at	0.00307	-0.452	-1.4
LOC23085	ERC1	DOWN224	down	downdown	64080_at	0.301	-0.437	-1.4
LOC91746	YTHDC1	UP224	down	updown	84516_at	0.00189	-0.421	-1.3
LOC5496	PPM1G	DOWN224	down	downdown	10150_at	0.0401	-0.412	-1.3
LOC27130	INVS	DOWN25	down	downdown	2150_at	0.216	-0.399	-1.3
LOC55011	PIH1D1	DOWN224	down	downdown	6821_at	0.0165	-0.399	-1.3
LOC90379	DCAF15	DOWN224	down	downdown	26240_at	0.124	-0.387	-1.3
LOC80218	NAA50	DOWN25	down	downdown	2542_at	0.275	-0.383	-1.3
LOC79733	E2F8	DOWN224	down	downdown	6470_at	0.403	-0.374	-1.3
LOC57585	CRAMP1L	DOWN224	down	downdown	3032_at	0.0342	-0.36	-1.3
LOC817	CAMK2D	DOWN224	down	downdown	221294_at	0.0428	-0.353	-1.3
LOC41	ASIC1	DOWN224	down	downdown	6856_at	0.045	-0.352	-1.3
LOC64236	PDLIM2	DOWN224	down	downdown	80255_at	0.18	-0.35	-1.3
LOC10628	TXNIP	DOWN224	down	downdown	2329_at	0.349	-0.333	-1.3
LOC1854	DUT	DOWN224	down	downdown	10455_at	0.158	-0.321	-1.2
LOC55504	TNFRSF19	DOWN224	down	downdown	10768_at	0.0483	-0.309	-1.2
LOC23140	ZZEF1	DOWN224	down	downdown	83478_at	0.351	-0.308	-1.2
LOC8853	ASAP2	DOWN224	down	downdown	9527_at	0.0206	-0.295	-1.2
LOC11101	ATE1	DOWN224	down	downdown	10162_at	0.438	-0.295	-1.2
LOC146059	CDAN1	DOWN224	down	downdown	51397_at	0.142	-0.282	-1.2
LOC23313	KIAA0930	DOWN224	down	downdown	3728_at	0.411	-0.279	-1.2
LOC1728	NQO1	DOWN224	down	downdown	27244_at	0.0862	-0.274	-1.2
LOC402573	C7ORF61	DOWN224	down	downdown	25840_at	0.254	-0.269	-1.2
LOC1446	CSN1S1	DOWN224	down	downdown	55328_at	0.398	-0.267	-1.2
LOC284018	C17ORF58	DOWN224	down	downdown	54664_at	0.209	-0.254	-1.2
LOC27122	DKK3	DOWN224	down	downdown	81533_at	0.173	-0.249	-1.2
LOC10785	WDR4	DOWN224	down	downdown	23042_at	0.151	-0.247	-1.2
LOC5935	RBM3	DOWN224	down	downdown	79843_at	0.38	-0.241	-1.2
LOC2035	EPB41	DOWN224	down	downdown	55788_at	0.33	-0.241	-1.2
LOC65095	KRI1	DOWN224	down	downdown	84288_at	0.205	-0.231	-1.2
LOC3716	JAK1	DOWN224	down	downdown	55825_at	0.645	-0.231	-1.2
LOC378938	MALAT1	DOWN224	down	downdown	8436_at	0.652	-0.229	-1.2
LOC254263	CNIH2	DOWN224	down	downdown	473_at	0.324	-0.226	-1.2
LOC338699	ANKRD42	UP224	down	updown	59343_at	0.0987	-0.21	-1.2
LOC53405	CLIC5	DOWN224	down	downdown	10542_at	0.229	-0.207	-1.2
LOC1788	DNMT3A	UP224	down	updown	404281_at	0.0503	-0.206	-1.2
LOC23125	CAMTA2	DOWN224	down	downdown	4258_at	0.229	-0.205	-1.2
LOC56851	EMC7	DOWN25	down	downdown	4118_at	0.921	-0.202	-1.2
LOC7322	UBE2D2	DOWN224	down	downdown	56606_at	0.503	-0.202	-1.2
LOC9609	RAB36	DOWN224	down	downdown	54502_at	0.374	-0.198	-1.1
LOC120	ADD3	UP224	down	updown	9655_at	0.523	-0.197	-1.1
LOC339123	JMJD8	DOWN224	down	downdown	54749_at	0.673	-0.197	-1.1
LOC11252	PACSIN2	DOWN224	down	downdown	158471_at	0.861	-0.194	-1.1
LOC9445	ITM2B	DOWN224	down	downdown	4179_at	0.0785	-0.193	-1.1
LOC9196	KCNAB3	DOWN224	down	downdown	116068_at	0.101	-0.192	-1.1
LOC7265	TTC1	DOWN224	down	downdown	133383_at	0.799	-0.175	-1.1
LOC29074	MRPL18	DOWN224	down	downdown	27089_at	0.451	-0.17	-1.1
LOC57834	CYP4F11	DOWN224	down	downdown	51522_at	0.537	-0.161	-1.1
LOC26608	TBL2	DOWN25	down	downdown	9963_at	0.516	-0.159	-1.1
LOC1647	GADD45A	UP25	down	updown	4052_at	0.169	-0.158	-1.1
LOC4772	NFATC1	UP224	down	updown	51102_at	0.296	-0.156	-1.1
LOC5007	OSBP	UP224	down	updown	152137_at	0.245	-0.155	-1.1
LOC23508	TTC9	DOWN224	down	downdown	8462_at	0.359	-0.153	-1.1
LOC50632	CALY	UP224	down	updown	23085_at	0.631	-0.135	-1.1
LOC5308	PITX2	DOWN224	down	downdown	51234_at	0.384	-0.13	-1.1
LOC54812	AFTPH	DOWN224	down	downdown	515_at	0.215	-0.129	-1.1
LOC27020	NPTN	DOWN224	down	downdown	3212_at	0.775	-0.124	-1.1
LOC3590	IL11RA	DOWN224	down	downdown	27020_at	0.057	-0.122	-1.1
LOC26005	C2CD3	UP224	down	updown	91746_at	0.306	-0.115	-1.1
LOC3212	HOXB2	UP224	down	updown	5496_at	0.476	-0.113	-1.1
LOC515	ATP5F1	UP224	down	updown	27130_at	0.0909	-0.112	-1.1
LOC84973	SNHG7	DOWN224	down	downdown	54812_at	0.73	-0.109	-1.1
LOC51234	EMC4	DOWN224	down	downdown	5007_at	0.441	-0.104	-1.1
LOC8462	KLF11	DOWN224	down	downdown	1647_at	0.57	-0.101	-1.1
LOC9963	SLC23A1	DOWN224	down	downdown	26608_at	0.175	-0.0938	-1.1
LOC85366	MYLK2	DOWN224	down	downdown	57834_at	0.774	-0.0902	-1.1
	PPP2R3B || ? || ?	DOWN224	down	downdown	29074_at	0.851	-0.0877	-1.1
LOC9423	NTN1	UP224	down	updown	55011_at	0.688	-0.0794	-1.1
LOC339451	KLHL17	UP224	down	updown	90379_at	0.849	-0.071	-1.1
LOC51522	TMEM14C	DOWN224	down	downdown	7265_at	0.25	-0.0679	-1
LOC27089	UQCRQ	UP224	down	updown	80218_at	0.631	-0.0645	-1
LOC133383	SETD9	DOWN224	down	downdown	9445_at	0.613	-0.0639	-1
LOC116068	LYSMD3	UP25	down	updown	79733_at	0.664	-0.0635	-1
LOC4179	CD46	DOWN224	down	downdown	11252_at	0.893	-0.0618	-1
LOC79741	CCDC7	DOWN224	down	downdown	339123_at	0.78	-0.0607	-1
LOC158471	PRUNE2	UP224	down	updown	57585_at	0.768	-0.058	-1
LOC1482	NKX2-5	DOWN224	down	downdown	120_at	0.73	-0.0556	-1
LOC29115	SAP30BP	DOWN224	down	downdown	9609_at	0.869	-0.0538	-1
LOC54749	EPDR1	DOWN224	down	downdown	7322_at	0.441	-0.0522	-1
LOC54502	RBM47	UP224	down	updown	817_at	0.846	-0.0395	-1
LOC9057	SLC7A6	UP224	down	updown	41_at	0.266	-0.0388	-1
LOC4140	MARK3	DOWN224	down	downdown	56851_at	0.885	-0.0386	-1
LOC4118	MAL	DOWN224	down	downdown	338699_at	0.783	-0.0331	-1
LOC9758	FRMPD4	DOWN224	down	downdown	3716_at	0.845	-0.0291	-1
LOC56606	SLC2A9	DOWN224	down	downdown	2035_at	0.876	-0.0284	-1
LOC7352	UCP3	DOWN224	down	downdown	27122_at	0.35	-0.0203	-1
LOC4258	MGST2	DOWN224	down	downdown	284018_at	0.295	-0.0187	-1
LOC196403	DTX3	DOWN224	down	downdown	1728_at	0.0631	-0.0168	-1
LOC4010	LMX1B	DOWN224	down	downdown	11101_at	0.841	-0.0163	-1
LOC10542	LAMTOR5	UP224	down	updown	64236_at	0.483	-0.0131	-1
LOC473	RERE	DOWN224	down	downdown	8853_at	0.385	-0.0128	-1
LOC9586	CREB5	UP224	down	updown	1854_at	0.991	-0.0124	-1
LOC197322	ACSF3	DOWN224	down	downdown	10628_at	0.519	-0.0116	-1
LOC8436	SDPR	DOWN224	down	downdown	63908_at	0.156	-0.0087	-1
LOC79915	ATAD5	DOWN224	down	downdown	28232_at	0.672	-0.00383	-1
LOC54785	C17ORF59	UP25	down	updown	55504_at	1	-0.00367	-1
LOC84288	EFCAB2	DOWN224	down	downdown	51128_at	0.908	-0.00227	-1
LOC55825	PECR	UP224	up	upup	23140_at	0.951	0.00483	1
LOC51343	FZR1	UP224	up	upup	146059_at	0.676	0.00486	1
LOC79843	FAM124B	UP224	up	upup	23313_at	0.738	0.00621	1
LOC55788	LMBRD1	UP224	up	upup	402573_at	0.889	0.00736	1
	PDXDC1 || ?	DOWN224	up	downup	54103_at	0.902	0.00846	1
LOC81533	ITFG1	UP224	up	upup	1446_at	0.721	0.0111	1
LOC4150	MAZ	UP224	up	upup	10785_at	0.968	0.0118	1
LOC782	CACNB1	UP224	up	upup	5935_at	0.736	0.0207	1
LOC6670	SP3	UP224	up	upup	65095_at	0.84	0.0211	1
LOC54664	TMEM106B	UP224	up	upup	378938_at	0.96	0.0217	1
LOC60468	BACH2	UP224	up	upup	254263_at	0.392	0.0284	1
LOC5331	PLCB3	UP224	up	upup	53405_at	0.933	0.0286	1
LOC11219	TREX2	UP224	up	upup	1788_at	0.832	0.0314	1
LOC55328	RNLS	UP224	up	upup	23125_at	0.956	0.037	1
LOC25840	METTL7A	UP224	up	upup	9196_at	0.7	0.0395	1
LOC27244	SESN1	UP25	up	upup	4772_at	0.778	0.0471	1
LOC8193	DPF1	UP224	up	upup	23508_at	0.95	0.0481	1
LOC170463	SSBP4	UP224	up	upup	50632_at	0.744	0.0519	1
LOC3728	JUP	UP25	up	upup	5308_at	0.605	0.0555	1
LOC51397	COMMD10	UP25	up	upup	3590_at	0.701	0.0576	1
LOC27185	DISC1	UP224	up	upup	26005_at	0.522	0.0576	1
LOC9527	GOSR1	DOWN224	up	downup	89885_at	0.27	0.059	1
LOC10162	LPCAT3	UP224	up	upup	84973_at	0.526	0.0659	1
LOC10650	SLMO1	UP25	up	upup	85366_at	0.543	0.0671	1
	AP1G2 || JPH4	UP224	up	upup	28227_at	0.473	0.0763	1.1
LOC11186	RASSF1	UP224	up	upup	9423_at	0.322	0.0764	1.1
LOC649	BMP1	UP224	up	upup	339451_at	0.263	0.0771	1.1
LOC129807	NEU4	UP224	up	upup	79741_at	0.605	0.0791	1.1
LOC399473	SPRED3	UP224	up	upup	1482_at	0.43	0.0814	1.1
LOC8822	FGF17	UP224	up	upup	29115_at	0.364	0.0824	1.1
LOC83478	ARHGAP24	UP224	up	upup	9057_at	0.63	0.0892	1.1
LOC10768	AHCYL1	UP224	up	upup	4140_at	0.22	0.09	1.1
LOC10455	ECI2	UP224	up	upup	9758_at	0.169	0.0909	1.1
LOC2329	FMO4	DOWN224	up	downup	1803_at	0.971	0.0931	1.1
LOC80255	SLC35F5	UP25	up	upup	7352_at	0.317	0.0938	1.1
LOC340205	TREML1	UP224	up	upup	196403_at	0.35	0.1	1.1
LOC6856	SYPL1	UP224	up	upup	4010_at	0.294	0.1	1.1
LOC201294	UNC13D	UP224	up	upup	9586_at	0.94	0.103	1.1
LOC221294	NT5DC1	UP224	up	upup	197322_at	0.118	0.105	1.1
LOC3032	HADHB	UP224	up	upup	79915_at	0.735	0.107	1.1
LOC6470	SHMT1	UP224	up	upup	54785_at	0.332	0.108	1.1
LOC2542	SLC37A4	DOWN224	up	downup	1368_at	0.692	0.11	1.1
LOC25790	CCDC19	UP224	up	upup	51343_at	0.101	0.111	1.1
LOC26240	FAM50B	DOWN224	up	downup	283345_at	0.591	0.112	1.1
LOC2150	F2RL1	DOWN224	up	downup	51071_at	0.887	0.113	1.1
LOC7468	WHSC1	DOWN224	up	downup	5770_at	0.697	0.12	1.1
LOC6821	SUOX	UP224	up	upup	4150_at	0.564	0.12	1.1
LOC10150	MBNL2	UP25	up	upup	782_at	0.412	0.123	1.1
LOC64080	RBKS	UP224	up	upup	6670_at	0.157	0.132	1.1
LOC51008	ASCC1	UP25	up	upup	60468_at	0.249	0.135	1.1
LOC22949	PTGR1	UP224	up	upup	5331_at	0.459	0.138	1.1
LOC51390	AIG1	UP224	up	upup	11219_at	0.323	0.14	1.1
LOC8644	AKR1C3	UP224	up	upup	8193_at	0.102	0.142	1.1
LOC6584	SLC22A5	UP224	up	upup	170463_at	0.178	0.147	1.1
LOC23588	KLHDC2	DOWN224	up	downup	80344_at	0.327	0.15	1.1
LOC283933	ZNF843	UP224	up	upup	27185_at	0.0535	0.163	1.1
LOC64087	MCCC2	UP224	up	upup	10650_at	0.112	0.165	1.1
LOC3556	IL1RAP	UP224	up	upup	84502_at	0.145	0.173	1.1
LOC84557	MAP1LC3A	UP224	up	upup	11186_at	0.121	0.173	1.1
LOC23135	KDM6B	UP25	up	upup	649_at	0.244	0.175	1.1
LOC65981	CAPRIN2	UP224	up	upup	129807_at	0.0179	0.18	1.1
LOC221914	GPC2	UP224	up	upup	399473_at	0.0145	0.182	1.1
LOC135932	TMEM139	UP224	up	upup	8822_at	0.000122	0.196	1.1
LOC10469	TIMM44	UP224	up	upup	340205_at	0.397	0.218	1.2
LOC1429	CRYZ	UP224	up	upup	201294_at	0.0153	0.22	1.2
LOC25874	MPC2	UP224	up	upup	25790_at	0.121	0.223	1.2
LOC9053	MAP7	DOWN224	up	downup	80176_at	0.649	0.226	1.2
LOC9150	CTDP1	UP25	up	upup	7468_at	0.0781	0.227	1.2
LOC84293	FAM213A	UP224	up	upup	283933_at	0.0444	0.238	1.2
LOC26035	GLCE	UP224	up	upup	3556_at	0.0825	0.241	1.2
LOC5627	PROS1	UP224	up	upup	84557_at	0.00222	0.252	1.2
LOC4914	NTRK1	UP224	up	upup	23135_at	0.546	0.259	1.2
LOC29	ABR	UP224	up	upup	65981_at	0.0906	0.261	1.2
LOC24140	FTSJ1	UP224	up	upup	221914_at	0.142	0.265	1.2
LOC5274	SERPINI1	UP224	up	upup	10469_at	0.00514	0.281	1.2
LOC23321	TRIM2	UP224	up	upup	9150_at	0.0323	0.284	1.2
LOC5339	PLEC	UP224	up	upup	4914_at	0.0111	0.299	1.2
LOC3773	KCNJ16	UP224	up	upup	29_at	0.223	0.321	1.2
LOC79623	GALNT14	UP224	up	upup	24140_at	0.186	0.33	1.3
LOC84689	MS4A14	UP25	up	upup	5339_at	0.196	0.337	1.3
LOC338692	ANKRD13D	UP224	up	upup	84689_at	0.039	0.383	1.3
LOC59084	ENPP5	UP224	up	upup	338692_at	0.000854	0.385	1.3
LOC10068	IL18BP	UP224	up	upup	10068_at	0.26	0.49	1.4
LOC80774	LIMD2	UP224	up	upup	80774_at	0.0519	0.641	1.6
LOC8522	GAS7	UP224	up	upup	8522_at	0.0314	0.694	1.6
LOC4046	LSP1	UP224	up	upup	4046_at	0.0389	0.802	1.7
LOC5329	PLAUR	UP224	up	upup	5329_at	0.0279	0.924	1.9
LOC6348	CCL3	UP25	up	upup	6348_at	0.0164	1.08	2.1

## Sheet: S5 779Day28
Probeset	ENTREZ	LocusLink	Symbol	IRIS_Most_Specific	p.response28	q.response28	Effect.Size	Fold.Change	Responder_Day28_GrpAvg	NonResponder_Day28_GrpAvg
146722_at	146722	LOC146722	CD300LF	NA	0.00999227	0.124385	0.6	1.52	5.11	4.51
9760_at	9760	LOC9760	TOX	NA	0.00996953	0.124214	0.79	1.72	3.71	2.93
84243_at	84243	LOC84243	ZDHHC18	Myeloid	0.00993011	0.123835	0.5	1.42	4.66	4.15
55619_at	55619	LOC55619	DOCK10	Multiple	0.00991016	0.123698	0.65	1.57	7.37	6.72
84457_at	84457	LOC84457	PHYHIPL	NA	0.00990221	0.123698	-1.01	0.5	3.93	4.94
374986_at	374986	LOC374986	FAM73A	NA	0.0098744	0.123475	-0.51	0.7	6.13	6.63
9834_at	9834	LOC9834	KIAA0125	B Cell	0.00985842	0.123387	0.73	1.66	4.13	3.39
285513_at	285513	LOC285513	GPRIN3	Multiple	0.00977364	0.122992	0.69	1.62	5.79	5.1
3696_at	3696	LOC3696	ITGB8	Myeloid	0.00977454	0.122992	-0.72	0.61	5.6	6.32
90390_at	90390	LOC90390	MED30	Multiple	0.0097495	0.122992	0.45	1.36	5.74	5.3
64122_at	64122	LOC64122	FN3K	NA	0.00968576	0.122663	-1.11	0.46	4.52	5.63
4170_at	4170	LOC4170	MCL1	Myeloid	0.00969403	0.122663	0.34	1.27	6.53	6.18
5152_at	5152	LOC5152	PDE9A	NA	0.00968565	0.122663	-0.86	0.55	3.52	4.38
10288_at	10288	LOC10288	LILRB2	Myeloid	0.00962586	0.122523	1.1	2.15	7.9	6.8
56957_at	56957	LOC56957	OTUD7B	NA	0.00964898	0.122523	-0.41	0.76	4.4	4.8
6662_at	6662	LOC6662	SOX9	NA	0.0096552	0.122523	-1.18	0.44	5.72	6.9
10308_at	10308	LOC10308	ZNF267	Multiple	0.00963078	0.122523	0.58	1.5	7.13	6.54
79699_at	79699	LOC79699	ZYG11B	NA	0.0096089	0.122484	-0.44	0.74	5.13	5.57
1240_at	1240	LOC1240	CMKLR1	NA	0.00959365	0.122403	0.65	1.57	5.54	4.89
81558_at	81558	LOC81558	FAM117A	NA	0.00957928	0.122394	0.68	1.61	5.26	4.57
221914_at	221914	LOC221914	GPC2	NA	0.00956955	0.122394	0.43	1.35	4.43	4
4641_at	4641	LOC4641	MYO1C	NA	0.00958404	0.122394	-0.44	0.74	6.36	6.8
4191_at	4191	LOC4191	MDH2	NA	0.00955674	0.122385	-0.38	0.77	8.8	9.19
9592_at	9592	LOC9592	IER2	NA	0.00952822	0.122304	0.45	1.37	7.85	7.39
27240_at	27240	LOC27240	SIT1	NA	0.00954162	0.122304	1.05	2.07	5.25	4.21
4040_at	4040	LOC4040	LRP6	NA	0.00950031	0.122229	-0.6	0.66	5.84	6.44
3400_at	3400	LOC3400	ID4	NA	0.00945887	0.122037	-1.13	0.46	4.28	5.41
166647_at	166647	LOC166647	GPR125	NA	0.00944984	0.122034	-0.8	0.58	3.02	3.82
169792_at	169792	LOC169792	GLIS3	NA	0.00940873	0.12196	-0.53	0.69	4.11	4.64
57556_at	57556	LOC57556	SEMA6A	NA	0.00940132	0.12196	-1.04	0.49	5.48	6.51
26973_at	26973	LOC26973	CHORDC1	Multiple	0.00935165	0.121563	0.48	1.39	6.2	5.73
26353_at	26353	LOC26353	HSPB8	NA	0.0093429	0.121563	-1.03	0.49	5.55	6.58
219285_at	219285	LOC219285	SAMD9L	Multiple	0.0093303	0.121514	0.83	1.78	6.84	6.01
10462_at	10462	LOC10462	CLEC10A	Dendritic Cell	0.00929683	0.121422	0.33	1.25	2.71	2.38
476_at	476	LOC476	ATP1A1	NA	0.00924733	0.121336	-0.44	0.74	10.72	11.16
23268_at	23268	LOC23268	DNMBP	NA	0.0092815	0.121336	-0.51	0.7	3.64	4.14
6793_at	6793	LOC6793	STK10	Multiple	0.00926374	0.121336	0.59	1.51	5.12	4.53
81608_at	81608	LOC81608	FIP1L1	NA	0.00919813	0.120933	0.39	1.31	8.86	8.47
10131_at	10131	LOC10131	TRAP1	NA	0.00915651	0.120616	-0.69	0.62	6.81	7.5
23643_at	23643	LOC23643	LY96	Multiple	0.00910597	0.120295	1.05	2.07	8.38	7.33
116987_at	116987	LOC116987	AGAP1	NA	0.00906537	0.12	-0.42	0.75	4.76	5.18
79711_at	79711	LOC79711	IPO4	NA	0.00904072	0.12	-0.55	0.68	4.43	4.97
51520_at	51520	LOC51520	LARS	NA	0.00906545	0.12	-0.36	0.78	6.23	6.6
4644_at	4644	LOC4644	MYO5A	NA	0.00902109	0.12	0.55	1.46	6.52	5.97
5747_at	5747	LOC5747	PTK2	NA	0.00902896	0.12	-0.52	0.7	5.62	6.15
4753_at	4753	LOC4753	NELL2	NA	0.00899209	0.119822	0.82	1.76	5.12	4.3
2204_at	2204	LOC2204	FCAR	Myeloid	0.00898006	0.119777	0.48	1.4	3.22	2.74
3059_at	3059	LOC3059	HCLS1	Multiple	0.00897076	0.119769	0.92	1.9	7.25	6.33
27180_at	27180	LOC27180	SIGLEC9	NA	0.00889697	0.119129	0.76	1.69	4.24	3.48
23118_at	23118	LOC23118	TAB2	NA	0.00889167	0.119129	0.41	1.33	7.48	7.08
51296_at	51296	LOC51296	SLC15A3	Myeloid	0.00884388	0.118649	0.65	1.57	5.94	5.28
60682_at	60682	LOC60682	SMAP1	NA	0.008834	0.118649	0.32	1.25	6.2	5.88
6688_at	6688	LOC6688	SPI1	Myeloid	0.00882221	0.118649	0.51	1.43	4.76	4.24
6711_at	6711	LOC6711	SPTBN1	NA	0.00878783	0.118649	-0.53	0.69	7.37	7.9
63929_at	63929	LOC63929	XPNPEP3	NA	0.00882263	0.118649	-0.45	0.73	5	5.45
57121_at	57121	LOC57121	LPAR5	NA	0.00875015	0.118543	0.5	1.42	4.61	4.1
91543_at	91543	LOC91543	RSAD2	Myeloid	0.00874584	0.118543	1.12	2.18	6.13	5
222236_at	222236	LOC222236	NAPEPLD	NA	0.00871009	0.118371	-0.49	0.71	4.28	4.78
9219_at	9219	LOC9219	MTA2	NA	0.00863144	0.117512	0.33	1.26	4.17	3.83
142686_at	142686	LOC142686	ASB14	NA	0.00855117	0.116649	0.34	1.27	4.36	4.02
56122_at	56122	LOC56122	PCDHB14	NA	0.00848275	0.115945	-0.5	0.71	4.29	4.79
80183_at	80183	LOC80183	KIAA0226L	Multiple	0.00846824	0.115861	0.66	1.58	4.29	3.63
51491_at	51491	LOC51491	NOP16	NA	0.0084506	0.115735	-0.58	0.67	6.01	6.59
3291_at	3291	LOC3291	HSD11B2	NA	0.00843952	0.115698	-1.14	0.45	3.67	4.81
286148_at	286148	LOC286148	DPY19L4	NA	0.00841416	0.115465	-0.43	0.74	6.59	7.02
917_at	917	LOC917	CD3G	T Cell	0.00839912	0.115456	1.31	2.48	7.19	5.89
64792_at	64792	LOC64792	RABL5	NA	0.00830822	0.11458	-0.65	0.64	5.72	6.37
11177_at	11177	LOC11177	BAZ1A	Multiple	0.00821381	0.114297	0.54	1.45	7.59	7.05
22898_at	22898	LOC22898	DENND3	NA	0.00826561	0.114297	0.49	1.4	4.26	3.77
94240_at	94240	LOC94240	EPSTI1	NA	0.00820147	0.114297	1	2	6.88	5.88
22806_at	22806	LOC22806	IKZF3	NA	0.00827112	0.114297	1.42	2.68	6.37	4.95
140691_at	140691	LOC140691	TRIM69	Multiple	0.00824998	0.114297	0.41	1.33	3.37	2.96
23554_at	23554	LOC23554	TSPAN12	NA	0.00821659	0.114297	-1.47	0.36	7.09	8.56
8832_at	8832	LOC8832	CD84	Multiple	0.00815539	0.114037	0.98	1.98	7.05	6.07
9583_at	9583	LOC9583	ENTPD4	NA	0.00816669	0.114037	0.49	1.4	5.43	4.95
100506748_at	100506748	LOC100506748	NA	NA	0.00816682	0.114037	-0.85	0.56	6.13	6.98
79068_at	79068	LOC79068	FTO	NA	0.00810802	0.113887	-0.56	0.68	7.23	7.8
140711_at	140711	LOC140711	TLDC2	NA	0.00812595	0.113887	0.33	1.26	3.53	3.2
506_at	506	LOC506	ATP5B	NA	0.0080878	0.113814	-0.63	0.65	9.58	10.21
8030_at	8030	LOC8030	CCDC6	NA	0.00805816	0.113814	-0.45	0.73	7.32	7.77
10320_at	10320	LOC10320	IKZF1	Multiple	0.00804237	0.113755	0.89	1.86	6.15	5.26
10574_at	10574	LOC10574	CCT7	NA	0.00800504	0.113495	-0.33	0.8	8.11	8.44
3669_at	3669	LOC3669	ISG20	NA	0.00801577	0.113495	0.98	1.97	7.17	6.19
170954_at	170954	LOC170954	PPP1R18	Multiple	0.00800825	0.113495	0.63	1.55	7.44	6.81
2876_at	2876	LOC2876	GPX1	NA	0.00797415	0.113395	0.61	1.52	8.93	8.32
3304_at	3304	LOC3304	HSPA1B	NA	0.00797441	0.113395	-0.52	0.7	8.56	9.08
5294_at	5294	LOC5294	PIK3CG	Multiple	0.00795533	0.113395	0.8	1.74	6.01	5.21
51571_at	51571	LOC51571	FAM49B	Multiple	0.00791612	0.113128	0.66	1.58	7.72	7.05
26279_at	26279	LOC26279	PLA2G2D	NA	0.007862	0.112588	0.69	1.61	4.02	3.33
79623_at	79623	LOC79623	GALNT14	NA	0.00782673	0.112199	-1.56	0.34	5.79	7.35
7372_at	7372	LOC7372	UMPS	NA	0.00779644	0.111881	-0.44	0.74	5.96	6.4
3676_at	3676	LOC3676	ITGA4	Multiple	0.0077705	0.111625	0.72	1.65	5.9	5.18
1964_at	1964	LOC1964	EIF1AX	NA	0.00774634	0.11151	-0.5	0.71	6.81	7.3
23287_at	23287	LOC23287	AGTPBP1	NA	0.00772958	0.111385	0.6	1.51	6.85	6.26
11328_at	11328	LOC11328	FKBP9	NA	0.00768174	0.111043	-0.6	0.66	6.04	6.64
79663_at	79663	LOC79663	HSPBAP1	NA	0.007672	0.111019	0.55	1.46	5.86	5.31
9535_at	9535	LOC9535	GMFG	NA	0.00762946	0.11072	0.73	1.66	9.52	8.78
134359_at	134359	LOC134359	POC5	NA	0.00762963	0.11072	0.47	1.38	3.76	3.29
81669_at	81669	LOC81669	CCNL2	NA	0.00759202	0.110694	0.54	1.45	5.06	4.52
57488_at	57488	LOC57488	ESYT2	NA	0.00758229	0.110694	-0.48	0.72	6.22	6.69
84541_at	84541	LOC84541	KBTBD8	Multiple	0.00756257	0.110694	0.61	1.53	3.66	3.04
4600_at	4600	LOC4600	MX2	Multiple	0.00758653	0.110694	0.93	1.9	5.97	5.04
51347_at	51347	LOC51347	TAOK3	NA	0.00757593	0.110694	0.33	1.26	7.21	6.88
30009_at	30009	LOC30009	TBX21	Lymphoid	0.00759346	0.110694	0.84	1.79	4.8	3.96
55337_at	55337	LOC55337	C19ORF66	NA	0.00751494	0.110647	0.44	1.36	5.83	5.39
79180_at	79180	LOC79180	EFHD2	Multiple	0.0075117	0.110647	0.61	1.52	6.15	5.54
8850_at	8850	LOC8850	KAT2B	NA	0.00745461	0.110301	0.6	1.52	6.19	5.58
10486_at	10486	LOC10486	CAP2	NA	0.00740517	0.109923	-1.03	0.49	6.23	7.26
942_at	942	LOC942	CD86	Dendritic Cell	0.00737239	0.109672	0.85	1.8	5.69	4.84
3631_at	3631	LOC3631	INPP4A	NA	0.00735283	0.109562	0.48	1.4	4.05	3.57
10990_at	10990	LOC10990	LILRB5	NA	0.00730456	0.109439	0.58	1.5	4.12	3.53
126364_at	126364	LOC126364	LRRC25	NA	0.00731248	0.109439	0.47	1.39	4.93	4.46
4281_at	4281	LOC4281	MID1	NA	0.007325	0.109439	-1.19	0.44	4.1	5.28
5140_at	5140	LOC5140	PDE3B	NA	0.0073016	0.109439	0.54	1.45	4.5	3.96
115727_at	115727	LOC115727	RASGRP4	Myeloid	0.00728813	0.109439	0.71	1.64	3.73	3.02
7289_at	7289	LOC7289	TULP3	NA	0.00732362	0.109439	-0.5	0.71	5.62	6.12
4763_at	4763	LOC4763	NF1	NA	0.00724447	0.109097	-0.34	0.79	6.22	6.56
133418_at	133418	LOC133418	EMB	NA	0.00721463	0.108969	0.98	1.98	5.96	4.98
9414_at	9414	LOC9414	TJP2	NA	0.00720123	0.108969	-0.59	0.66	5.42	6.02
10154_at	10154	LOC10154	PLXNC1	Multiple	0.00718846	0.108931	0.8	1.74	6.01	5.22
167153_at	167153	LOC167153	PAPD4	Multiple	0.00717927	0.108912	0.47	1.39	6.17	5.69
80303_at	80303	LOC80303	EFHD1	NA	0.00711734	0.108329	-1.19	0.44	3.79	4.98
7127_at	7127	LOC7127	TNFAIP2	Myeloid	0.0070869	0.107986	0.41	1.33	4.2	3.8
3329_at	3329	LOC3329	HSPD1	NA	0.00697964	0.106822	-0.47	0.72	10.49	10.96
2517_at	2517	LOC2517	FUCA1	NA	0.00692837	0.106204	0.36	1.29	7.88	7.52
201799_at	201799	LOC201799	TMEM154	Myeloid	0.00693154	0.106204	1.12	2.17	4.69	3.57
101060069_at	84859	LOC84859	LRCH3	NA	0.00690881	0.106091	0.39	1.31	5.16	4.77
5771_at	5771	LOC5771	PTPN2	NA	0.00686873	0.105711	0.34	1.27	5.11	4.77
663_at	663	LOC663	BNIP2	NA	0.00685218	0.105574	0.41	1.33	7.62	7.21
64581_at	64581	LOC64581	CLEC7A	Myeloid	0.0068057	0.10521	0.9	1.86	5.69	4.79
23576_at	23576	LOC23576	DDAH1	NA	0.006783	0.105159	-0.94	0.52	7.17	8.12
3480_at	3480	LOC3480	IGF1R	NA	0.00679354	0.105159	-0.75	0.6	5	5.74
440193_at	440193	LOC440193	CCDC88C	NA	0.00674351	0.104836	0.44	1.36	3.83	3.39
10333_at	10333	LOC10333	TLR6	NA	0.00672915	0.10473	0.47	1.39	3.52	3.05
199713_at	199713	LOC199713	NLRP7	B Cell	0.00671625	0.104647	0.44	1.35	3.12	2.69
10993_at	10993	LOC10993	SDS	NA	0.00666804	0.104368	1	2	5.91	4.91
57622_at	57622	LOC57622	LRFN1	Multiple	0.00664115	0.104183	0.34	1.27	2.98	2.64
1741_at	1741	LOC1741	DLG3	NA	0.0066169	0.103921	-0.55	0.68	5.37	5.92
51744_at	51744	LOC51744	CD244	NK Cell	0.00658578	0.10355	0.65	1.57	4.13	3.48
23708_at	23708	LOC23708	GSPT2	NA	0.00649938	0.102424	0.33	1.25	4.69	4.36
146556_at	146556	LOC146556	C16ORF89	NA	0.00647058	0.102375	0.57	1.49	4.95	4.38
1195_at	1195	LOC1195	CLK1	NA	0.00646154	0.102375	0.53	1.45	7.94	7.4
54947_at	54947	LOC54947	LPCAT2	Myeloid	0.00648144	0.102375	0.69	1.62	6.44	5.75
10857_at	10857	LOC10857	PGRMC1	NA	0.0064757	0.102375	-0.59	0.66	9.02	9.61
55553_at	55553	LOC55553	SOX6	NA	0.00645126	0.102367	-1.13	0.46	3.77	4.9
55016_at	55016	LOC55016	MAR1	Multiple	0.00644211	0.10234	0.78	1.71	7.27	6.49
286077_at	286077	LOC286077	FAM83H	NA	0.00641632	0.102165	-0.85	0.55	3.99	4.84
10717_at	10717	LOC10717	AP4B1	NA	0.00639127	0.10212	0.4	1.32	5.07	4.67
2533_at	2533	LOC2533	FYB	Myeloid	0.00637051	0.101906	1.03	2.04	7.83	6.8
25854_at	25854	LOC25854	FAM149A	NA	0.0063276	0.101472	-0.88	0.54	5.92	6.8
28638_at	28638	LOC28638	TRBC2	T Cell	0.00629319	0.101374	1.5	2.83	9.86	8.36
26051_at	26051	LOC26051	PPP1R16B	NA	0.00625779	0.100921	0.58	1.5	4.45	3.87
346171_at	346171	LOC346171	ZFP57	NA	0.00625433	0.100921	0.36	1.28	3.22	2.86
7099_at	7099	LOC7099	TLR4	Myeloid	0.00624303	0.100919	0.66	1.58	7.4	6.74
92106_at	92106	LOC92106	OXNAD1	T Cell	0.00622634	0.100886	0.58	1.5	7.38	6.8
10040_at	10040	LOC10040	TOM1L1	NA	0.00620063	0.100587	-1.02	0.49	6.13	7.15
10863_at	10863	LOC10863	ADAM28	NA	0.00614665	0.100297	0.78	1.71	6.78	6
3643_at	3643	LOC3643	INSR	NA	0.0061676	0.100297	-0.96	0.51	6.21	7.17
64284_at	64284	LOC64284	RAB17	NA	0.00617267	0.100297	-1.52	0.35	5.88	7.39
79589_at	79589	LOC79589	RNF128	NA	0.00616385	0.100297	-1.2	0.43	5.53	6.73
100_at	100	LOC100	ADA	NA	0.00611817	0.0999542	0.61	1.53	4.84	4.22
79961_at	79961	LOC79961	DENND2D	Lymphoid	0.00608633	0.0995518	0.75	1.68	7.8	7.05
29068_at	29068	LOC29068	ZBTB44	NA	0.00605122	0.0990949	-0.54	0.69	7.94	8.48
252839_at	252839	LOC252839	TMEM9	NA	0.00603934	0.0990178	-0.51	0.7	6.2	6.71
79895_at	79895	LOC79895	ATP8B4	NA	0.00602701	0.0989421	0.71	1.64	5.14	4.43
5096_at	5096	LOC5096	PCCB	NA	0.00602756	0.0989421	-0.67	0.63	5.3	5.97
23580_at	23580	LOC23580	CDC42EP4	NA	0.00598991	0.0985586	-0.43	0.74	5.89	6.31
27235_at	27235	LOC27235	COQ2	NA	0.00597861	0.0985586	0.42	1.34	6.1	5.68
1508_at	1508	LOC1508	CTSB	Myeloid	0.00598519	0.0985586	0.53	1.45	10.5	9.97
154075_at	154075	LOC154075	SAMD3	Lymphoid	0.00596442	0.0985586	0.78	1.71	4.66	3.88
54434_at	54434	LOC54434	SSH1	Multiple	0.00598154	0.0985586	0.33	1.26	4.85	4.52
5906_at	5906	LOC5906	RAP1A	Multiple	0.00595022	0.0984924	0.4	1.32	9.4	9
863_at	863	LOC863	CBFA2T3	NA	0.00588138	0.0974923	0.47	1.39	2.95	2.48
1050_at	1050	LOC1050	CEBPA	NA	0.00588214	0.0974923	0.84	1.8	6.24	5.39
84937_at	84937	LOC84937	ZNRF1	T Cell	0.00588274	0.0974923	0.36	1.29	4.79	4.42
8900_at	8900	LOC8900	CCNA1	NA	0.00585445	0.0974382	0.37	1.3	2.44	2.07
26157_at	26157	LOC26157	GIMAP2	Multiple	0.00583919	0.0974382	0.84	1.79	7.43	6.59
3738_at	3738	LOC3738	KCNA3	NA	0.0058006	0.0971825	1.23	2.34	5.58	4.35
64710_at	64710	LOC64710	NUCKS1	NA	0.00577873	0.0970501	-0.38	0.77	8.48	8.86
11129_at	11129	LOC11129	CLASRP	NA	0.00576016	0.0968561	0.54	1.45	5	4.46
79993_at	79993	LOC79993	ELOVL7	NA	0.0057376	0.0968561	-1.4	0.38	4.16	5.56
55327_at	55327	LOC55327	LIN7C	NA	0.00575725	0.0968561	-0.47	0.72	7.13	7.6
7286_at	7286	LOC7286	TUFT1	NA	0.00576006	0.0968561	-0.54	0.69	3.26	3.8
60489_at	60489	LOC60489	APOBEC3G	Multiple	0.00571022	0.0967234	1.04	2.06	7.13	6.08
11184_at	11184	LOC11184	MAP4K1	Lymphoid	0.00570093	0.0967234	0.76	1.69	4.79	4.03
7844_at	7844	LOC7844	RNF103	NA	0.00570423	0.0967234	-0.33	0.8	7.59	7.92
38_at	38	LOC38	ACAT1	NA	0.00564042	0.0966986	-0.8	0.57	9.16	9.96
128346_at	128346	LOC128346	C1ORF162	Myeloid	0.00567287	0.0966986	0.86	1.81	8.19	7.33
25904_at	25904	LOC25904	CNOT10	Dendritic Cell	0.00567471	0.0966986	0.35	1.27	5.1	4.75
9595_at	9595	LOC9595	CYTIP	Multiple	0.00564827	0.0966986	1.13	2.19	5.99	4.85
4259_at	4259	LOC4259	MGST3	NA	0.00568075	0.0966986	-0.51	0.7	9.33	9.84
80301_at	80301	LOC80301	PLEKHO2	NA	0.00566423	0.0966986	0.67	1.59	7.1	6.43
283991_at	283991	LOC283991	UBALD2	NA	0.00567019	0.0966986	0.54	1.45	5.5	4.96
79930_at	79930	LOC79930	DOK3	NA	0.00560647	0.0966138	0.67	1.6	4.76	4.09
80308_at	80308	LOC80308	FLAD1	NA	0.00561636	0.0966138	0.38	1.3	4.56	4.18
30011_at	30011	LOC30011	SH3KBP1	NA	0.00558727	0.0966138	0.6	1.51	5.95	5.36
7072_at	7072	LOC7072	TIA1	NA	0.00561477	0.0966138	0.45	1.36	6.3	5.85
393_at	393	LOC393	ARHGAP4	NA	0.00553549	0.0964712	0.54	1.46	5.12	4.57
5425_at	5425	LOC5425	POLD2	NA	0.00554159	0.0964712	-0.65	0.64	6.09	6.74
6007_at	6007	LOC6007	RHD	NA	0.00552096	0.0964051	0.37	1.29	3.01	2.64
79896_at	79896	LOC79896	THNSL1	NA	0.00547654	0.0958221	-0.47	0.72	3.29	3.76
394_at	394	LOC394	ARHGAP5	NA	0.00540038	0.0947295	-0.52	0.7	5.05	5.57
80764_at	80764	LOC80764	THAP7	NA	0.00539576	0.0947295	0.32	1.25	3.13	2.81
25929_at	25929	LOC25929	GEMIN5	NA	0.00533458	0.0938138	-0.39	0.76	5.15	5.54
154796_at	154796	LOC154796	AMOT	NA	0.00529912	0.0935476	-0.92	0.53	3.65	4.58
1645_at	1645	LOC1645	AKR1C1	NA	0.00526145	0.0932403	-1.82	0.28	5.96	7.78
338339_at	338339	LOC338339	CLEC4D	NA	0.00523064	0.0932403	0.74	1.67	3.49	2.75
285150_at	285150	LOC285150	FLJ33534	NA	0.00522991	0.0932403	0.37	1.29	3.67	3.31
619569_at	619569	LOC619569	SNORA41	NA	0.0052586	0.0932403	0.99	1.98	5.33	4.34
6775_at	6775	LOC6775	STAT4	Lymphoid	0.00522067	0.0932403	0.93	1.9	5.34	4.41
163590_at	163590	LOC163590	TOR1AIP2	NA	0.00525044	0.0932403	-0.55	0.68	4.46	5.01
10160_at	10160	LOC10160	FARP1	NA	0.00516117	0.0928437	-0.63	0.65	5.69	6.32
112574_at	112574	LOC112574	SNX18	NA	0.00516905	0.0928437	0.46	1.37	5.34	4.89
79626_at	79626	LOC79626	TNFAIP8L2	NA	0.00517181	0.0928437	0.89	1.86	6.27	5.38
925_at	925	LOC925	CD8A	T Cell	0.00514324	0.0926923	1.48	2.79	7.55	6.08
23312_at	23312	LOC23312	DMXL2	NA	0.00511722	0.0926809	0.67	1.59	6.18	5.51
2581_at	2581	LOC2581	GALC	NA	0.00513589	0.0926809	0.47	1.39	6.18	5.7
8496_at	8496	LOC8496	PPFIBP1	NA	0.00513501	0.0926809	-0.65	0.64	5.74	6.39
10409_at	10409	LOC10409	BASP1	NA	0.00510409	0.0925912	1.03	2.04	9.38	8.35
5777_at	5777	LOC5777	PTPN6	Multiple	0.00496575	0.0905575	0.75	1.68	7.82	7.06
23207_at	23207	LOC23207	PLEKHM2	NA	0.00494932	0.090497	0.36	1.29	4.56	4.19
9231_at	9231	LOC9231	DLG5	NA	0.00491024	0.0903966	-0.46	0.73	5.88	6.33
10219_at	10219	LOC10219	KLRG1	Lymphoid	0.00491888	0.0903966	0.84	1.79	5.26	4.43
29110_at	29110	LOC29110	TBK1	NA	0.00492308	0.0903966	0.35	1.27	6.71	6.36
2833_at	2833	LOC2833	CXCR3	NA	0.00486885	0.0900998	0.64	1.56	4.11	3.47
401124_at	401124	LOC401124	DTHD1	NA	0.00486157	0.0900857	0.5	1.41	3.48	2.98
22837_at	22837	LOC22837	COBLL1	NA	0.00484002	0.0899278	-0.82	0.57	5.01	5.83
728_at	728	LOC728	C5AR1	Myeloid	0.00481309	0.089548	1.05	2.06	6.19	5.14
29909_at	29909	LOC29909	GPR171	Multiple	0.00480987	0.089548	1.3	2.46	6.28	4.98
54106_at	54106	LOC54106	TLR9	NA	0.00479207	0.089548	0.33	1.25	2.83	2.51
23731_at	23731	LOC23731	TMEM245	NA	0.00480203	0.089548	-0.59	0.66	6.32	6.91
2217_at	2217	LOC2217	FCGRT	NA	0.0047423	0.089283	0.46	1.38	9.38	8.92
11309_at	11309	LOC11309	SLCO2B1	NA	0.00474053	0.089283	0.53	1.44	5.2	4.67
968_at	968	LOC968	CD68	NA	0.00472607	0.0892522	0.73	1.65	9	8.27
27197_at	27197	LOC27197	GPR82	NA	0.00469619	0.0892522	0.64	1.55	3.82	3.18
5788_at	5788	LOC5788	PTPRC	Multiple	0.00470145	0.0892522	1.03	2.05	8.28	7.25
6195_at	6195	LOC6195	RPS6KA1	NA	0.00471477	0.0892522	0.55	1.46	5.27	4.72
10165_at	10165	LOC10165	SLC25A13	NA	0.0047253	0.0892522	-0.72	0.61	4.57	5.28
26118_at	26118	LOC26118	WSB1	NA	0.00472258	0.0892522	0.64	1.56	9	8.36
85415_at	85415	LOC85415	RHPN2	NA	0.00467242	0.0889692	-1.21	0.43	4.84	6.05
2770_at	2770	LOC2770	GNAI1	NA	0.00465269	0.0888245	-0.78	0.58	5.42	6.2
3640_at	3640	LOC3640	INSL3	NA	0.004655	0.0888245	0.34	1.26	3	2.66
7462_at	7462	LOC7462	LAT2	Multiple	0.00465839	0.0888245	0.63	1.55	4.73	4.1
27181_at	27181	LOC27181	SIGLEC8	NA	0.00462428	0.0886986	0.78	1.72	3.92	3.14
92241_at	92241	LOC92241	RCSD1	Multiple	0.0046113	0.0886615	0.73	1.66	6.88	6.15
10579_at	10579	LOC10579	TACC2	NA	0.00460871	0.0886615	-0.8	0.57	3.94	4.74
26056_at	26056	LOC26056	RAB11FIP5	NA	0.00459364	0.0885685	-0.62	0.65	6.01	6.64
445_at	445	LOC445	ASS1	NA	0.0045686	0.0882512	-1.12	0.46	5.75	6.87
356_at	356	LOC356	FASLG	Lymphoid	0.00457078	0.0882512	0.71	1.63	3.97	3.26
23089_at	23089	LOC23089	PEG10	NA	0.00455646	0.0882215	-1.28	0.41	3.48	4.76
28958_at	28958	LOC28958	COA3	NA	0.00452924	0.0878176	-0.76	0.59	6.85	7.61
6789_at	6789	LOC6789	STK4	Multiple	0.00450869	0.087542	0.55	1.47	8.48	7.93
4257_at	4257	LOC4257	MGST1	NA	0.00449085	0.0873184	-1.26	0.42	7.75	9.01
58487_at	58487	LOC58487	CREBZF	NA	0.00447877	0.0872626	0.45	1.36	5.5	5.05
4210_at	4210	LOC4210	MEFV	Multiple	0.00448166	0.0872626	0.57	1.48	3.18	2.61
50937_at	50937	LOC50937	CDON	NA	0.00441294	0.0871872	-0.92	0.53	3.52	4.45
2999_at	2999	LOC2999	GZMH	Lymphoid	0.00446515	0.0871872	1.53	2.88	7.53	6
126306_at	126306	LOC126306	JSRP1	NA	0.00443184	0.0871872	0.36	1.28	3.16	2.8
5142_at	5142	LOC5142	PDE4B	Multiple	0.00445763	0.0871872	0.98	1.98	4.65	3.67
200576_at	200576	LOC200576	PIKFYVE	NA	0.00443831	0.0871872	0.34	1.26	5.45	5.12
84302_at	84302	LOC84302	TMEM246	NA	0.00446095	0.0871872	-1.09	0.47	4.03	5.12
23065_at	23065	LOC23065	EMC1	NA	0.0043775	0.0869516	-0.5	0.71	6.21	6.71
9767_at	9767	LOC9767	JADE3	NA	0.00437485	0.0869516	-0.49	0.71	4.67	5.16
1605_at	1605	LOC1605	DAG1	NA	0.0043364	0.0866338	-0.45	0.73	6.5	6.94
84619_at	84619	LOC84619	ZGPAT	NA	0.0042665	0.085487	0.36	1.29	4.92	4.55
3660_at	3660	LOC3660	IRF2	Multiple	0.00425032	0.0854083	0.54	1.45	6.79	6.25
84689_at	84689	LOC84689	MS4A14	NA	0.00415262	0.0842683	0.54	1.45	2.85	2.32
677793_at	677793	LOC677793	SNORA2A	NA	0.00414199	0.0842122	0.42	1.33	2.89	2.47
2123_at	2123	LOC2123	EVI2A	Multiple	0.00404819	0.0834107	1.03	2.04	8.57	7.54
65220_at	65220	LOC65220	NADK	Myeloid	0.00402488	0.0831789	0.44	1.36	4.76	4.32
55589_at	55589	LOC55589	BMP2K	NA	0.00398008	0.0825431	0.48	1.39	6.19	5.71
3003_at	3003	LOC3003	GZMK	T Cell	0.00398814	0.0825431	1.88	3.67	7.7	5.82
132320_at	132320	LOC132320	SCLT1	NA	0.00397598	0.0825431	0.46	1.37	6.13	5.67
9636_at	9636	LOC9636	ISG15	NA	0.00394351	0.0822359	0.73	1.66	8.6	7.87
128338_at	128338	LOC128338	DRAM2	NA	0.00393599	0.0822032	0.47	1.39	7.37	6.9
53354_at	53354	LOC53354	PANK1	NA	0.00392487	0.0822032	-1.29	0.41	5.72	7.01
8502_at	8502	LOC8502	PKP4	NA	0.00391221	0.0820791	-0.75	0.6	6.12	6.87
10207_at	10207	LOC10207	INADL	NA	0.00387921	0.081725	-1.03	0.49	4.12	5.15
64780_at	64780	LOC64780	MICAL1	NA	0.0038839	0.081725	0.69	1.62	7.55	6.86
80821_at	80821	LOC80821	DDHD1	Multiple	0.00383652	0.0813565	0.63	1.55	7.11	6.48
28755_at	28755	LOC28755	TRAC	T Cell	0.00379851	0.0810484	1.53	2.9	8.11	6.57
79190_at	79190	LOC79190	IRX6	NA	0.00374627	0.0806233	-0.79	0.58	2.69	3.47
4820_at	4820	LOC4820	NKTR	Multiple	0.0037669	0.0806233	0.62	1.54	6.03	5.41
80008_at	80008	LOC80008	TMEM156	B Cell	0.00375235	0.0806233	0.79	1.73	3.68	2.89
50852_at	50852	LOC50852	TRAT1	T Cell	0.00375581	0.0806233	1.45	2.73	5.69	4.24
7126_at	7126	LOC7126	TNFAIP1	NA	0.00372485	0.080346	-0.48	0.72	5.59	6.07
55303_at	55303	LOC55303	GIMAP4	Multiple	0.00371796	0.080323	0.77	1.7	9.15	8.38
9956_at	9956	LOC9956	HS3ST2	NA	0.00370855	0.0802453	0.89	1.85	4.27	3.39
199_at	199	LOC199	AIF1	Myeloid	0.00369216	0.0800795	0.74	1.67	9.3	8.56
1959_at	1959	LOC1959	EGR2	NA	0.00366429	0.0800795	0.41	1.33	3.97	3.56
54749_at	54749	LOC54749	EPDR1	NA	0.00366304	0.0800795	-0.8	0.58	5.43	6.23
53827_at	53827	LOC53827	FXYD5	Multiple	0.00366867	0.0800795	0.64	1.56	8.18	7.54
168537_at	168537	LOC168537	GIMAP7	Multiple	0.00368542	0.0800795	0.95	1.94	8.87	7.91
10397_at	10397	LOC10397	NDRG1	NA	0.00369509	0.0800795	-1.05	0.48	8.56	9.61
51199_at	51199	LOC51199	NIN	Multiple	0.00368329	0.0800795	0.51	1.43	6.97	6.46
6503_at	6503	LOC6503	SLA	Multiple	0.00369137	0.0800795	1.07	2.09	7.19	6.12
8638_at	8638	LOC8638	OASL	NA	0.00362918	0.0797783	0.94	1.91	4.9	3.97
199746_at	199746	LOC199746	U2AF1L4	NA	0.00360612	0.0794328	0.59	1.5	5	4.42
10765_at	10765	LOC10765	KDM5B	NA	0.00357872	0.0794279	-0.53	0.69	4.42	4.95
5076_at	5076	LOC5076	PAX2	NA	0.00357515	0.0794279	-0.84	0.56	3.83	4.67
6737_at	6737	LOC6737	TRIM21	NA	0.00354574	0.0792588	0.53	1.45	7.02	6.49
719_at	719	LOC719	C3AR1	NA	0.00352514	0.0790008	0.82	1.76	8.42	7.6
84144_at	84144	LOC84144	SYDE2	NA	0.00350437	0.078663	-0.93	0.52	3.2	4.13
114769_at	114769	LOC114769	CARD16	NA	0.00349465	0.0785727	0.71	1.63	6.29	5.59
3718_at	3718	LOC3718	JAK3	Multiple	0.00348873	0.0785727	0.56	1.48	4.33	3.77
260429_at	260429	LOC260429	PRSS33	NA	0.00349208	0.0785727	0.61	1.52	2.9	2.29
5898_at	5898	LOC5898	RALA	Multiple	0.00348297	0.0785727	0.5	1.41	8.31	7.81
6728_at	6728	LOC6728	SRP19	NA	0.00349343	0.0785727	0.47	1.39	7.85	7.37
374467_at	144535	LOC144535	C12ORF55	NA	0.00343771	0.0781838	0.33	1.25	2.65	2.32
5774_at	5774	LOC5774	PTPN3	NA	0.00338311	0.0771963	-0.97	0.51	4.39	5.36
55357_at	55357	LOC55357	TBC1D2	NA	0.00337791	0.0771963	0.81	1.75	5.44	4.63
153562_at	153562	LOC153562	MARVELD2	NA	0.00334536	0.0771335	-1.37	0.39	4.06	5.43
23331_at	23331	LOC23331	TTC28	NA	0.00335618	0.0771335	-0.76	0.59	5	5.76
7586_at	7586	LOC7586	ZKSCAN1	NA	0.00328146	0.0761354	-0.47	0.72	5.51	5.98
11151_at	11151	LOC11151	CORO1A	Multiple	0.00325864	0.0758607	0.94	1.91	5.56	4.62
10482_at	10482	LOC10482	NXF1	NA	0.00324448	0.0757867	0.48	1.39	6.63	6.15
27071_at	27071	LOC27071	DAPP1	Myeloid	0.00323846	0.0757743	1.26	2.4	5.67	4.4
10006_at	10006	LOC10006	ABI1	Multiple	0.00322874	0.0756753	0.32	1.25	7.88	7.56
481_at	481	LOC481	ATP1B1	NA	0.00319998	0.0751287	-1.08	0.47	9.46	10.54
2673_at	2673	LOC2673	GFPT1	NA	0.00319937	0.0751287	-0.41	0.75	6.69	7.1
1493_at	1493	LOC1493	CTLA4	T Cell	0.00316217	0.0748344	0.95	1.93	4.58	3.62
51177_at	51177	LOC51177	PLEKHO1	NA	0.00316586	0.0748344	0.68	1.61	9.1	8.41
5792_at	5792	LOC5792	PTPRF	NA	0.003117	0.0744431	-0.84	0.56	6.1	6.94
9804_at	9804	LOC9804	TOMM20	NA	0.00312225	0.0744431	-0.48	0.72	7.83	8.31
124454_at	124454	LOC124454	EARS2	NA	0.00310412	0.0742675	-0.36	0.78	4.02	4.38
3001_at	3001	LOC3001	GZMA	Lymphoid	0.00309057	0.0740716	1.36	2.57	9.39	8.03
57522_at	57522	LOC57522	SRGAP1	NA	0.00308743	0.0740716	-0.38	0.77	5.17	5.55
57337_at	57337	LOC57337	SENP7	NA	0.00306742	0.073773	0.48	1.39	4.86	4.38
85379_at	85379	LOC85379	KIAA1671	NA	0.00304419	0.0733421	-0.81	0.57	6.18	6.99
1806_at	1806	LOC1806	DPYD	Myeloid	0.00303413	0.0732275	0.68	1.6	6.24	5.56
916_at	916	LOC916	CD3E	T Cell	0.00302297	0.073161	1.57	2.98	6.95	5.37
3385_at	3385	LOC3385	ICAM3	Multiple	0.00300749	0.073161	0.82	1.76	7.62	6.8
8569_at	8569	LOC8569	MKNK1	NA	0.00297743	0.0726207	0.42	1.33	4.48	4.06
9744_at	9744	LOC9744	ACAP1	Multiple	0.00297148	0.0726039	0.64	1.56	4.34	3.7
8348_at	8348	LOC8348	HIST1H2BO	NA	0.0029669	0.0726039	0.36	1.28	2.51	2.15
3226_at	3226	LOC3226	HOXC10	NA	0.00295349	0.0724208	-1.25	0.42	5.74	6.98
283897_at	NA	NA	C16ORF54 || ?	NA	0.00293248	0.0720335	1.25	2.39	7.15	5.9
55119_at	55119	LOC55119	PRPF38B	Multiple	0.00292583	0.0719983	0.34	1.27	6.47	6.13
83707_at	83707	LOC83707	TRPT1	NA	0.00290975	0.0717303	0.51	1.42	6.16	5.65
643418_at	643418	LOC643418	LIPN	NA	0.00289061	0.071386	0.41	1.33	2.49	2.09
3586_at	3586	LOC3586	IL10	NA	0.0028638	0.0709779	0.38	1.3	2.97	2.59
2212_at	2212	LOC2212	FCGR2A	Myeloid	0.00285746	0.070948	0.81	1.76	9.14	8.33
8905_at	8905	LOC8905	AP1S2	Monocyte	0.00279684	0.0695681	0.7	1.62	8.71	8.02
57669_at	57669	LOC57669	EPB41L5	NA	0.00279021	0.0695286	-0.62	0.65	3.46	4.08
51393_at	51393	LOC51393	TRPV2	Multiple	0.00277655	0.0694389	0.53	1.45	4.97	4.44
834_at	834	LOC834	CASP1	Monocyte	0.00272428	0.0689426	0.78	1.72	7.39	6.61
10225_at	10225	LOC10225	CD96	Lymphoid	0.00274672	0.0689426	0.96	1.94	4.92	3.96
3903_at	3903	LOC3903	LAIR1	NA	0.00273854	0.0689426	0.83	1.78	5.73	4.9
5552_at	5552	LOC5552	SRGN	NA	0.00272892	0.0689426	1.07	2.1	9.19	8.12
7305_at	7305	LOC7305	TYROBP	NA	0.00274523	0.0689426	0.81	1.75	10.17	9.37
101_at	101	LOC101	ADAM8	Multiple	0.00270715	0.0688479	0.45	1.37	4.19	3.74
3055_at	3055	LOC3055	HCK	Myeloid	0.00270924	0.0688479	0.81	1.75	5.88	5.07
84133_at	84133	LOC84133	ZNRF3	NA	0.00270792	0.0688479	-0.73	0.6	2.57	3.31
129607_at	129607	LOC129607	CMPK2	Myeloid	0.00269203	0.0688211	0.62	1.54	4.06	3.44
115290_at	115290	LOC115290	FBXO17	NA	0.00268189	0.0688211	-0.9	0.54	5	5.9
55505_at	55505	LOC55505	NOP10	NA	0.00267897	0.0688211	0.47	1.39	8.38	7.9
10966_at	10966	LOC10966	RAB40B	NA	0.00268915	0.0688211	-0.86	0.55	6.79	7.65
79413_at	79413	LOC79413	ZBED2	T Cell	0.00269087	0.0688211	1.09	2.13	4.13	3.04
89857_at	89857	LOC89857	KLHL6	Multiple	0.00265685	0.0686266	0.94	1.92	5.12	4.17
713_at	713	LOC713	C1QB	NA	0.00258678	0.0680416	0.95	1.94	9.6	8.65
780_at	780	LOC780	DDR1	NA	0.00261192	0.0680416	-0.89	0.54	4.89	5.78
64174_at	64174	LOC64174	DPEP2	Myeloid	0.00259374	0.0680416	1.18	2.26	5.89	4.71
10298_at	10298	LOC10298	PAK4	NA	0.00261625	0.0680416	-0.51	0.7	4.84	5.34
8554_at	8554	LOC8554	PIAS1	Multiple	0.00260381	0.0680416	0.42	1.33	6.76	6.34
79085_at	79085	LOC79085	SLC25A23	NA	0.00261534	0.0680416	-0.91	0.53	5.24	6.15
3659_at	3659	LOC3659	IRF1	Multiple	0.00255472	0.0674338	0.81	1.75	6.26	5.44
3766_at	3766	LOC3766	KCNJ10	NA	0.00255073	0.0674338	1.19	2.28	3.99	2.8
9935_at	9935	LOC9935	MAFB	Myeloid	0.00253816	0.0674338	0.98	1.97	6.96	5.98
79817_at	79817	LOC79817	MOB3B	NA	0.00255269	0.0674338	-0.99	0.5	4.24	5.23
9672_at	9672	LOC9672	SDC3	NA	0.00254121	0.0674338	0.73	1.66	6.14	5.41
84636_at	84636	LOC84636	GPR174	Lymphoid	0.00252442	0.0674074	1.36	2.57	5.49	4.12
10663_at	10663	LOC10663	CXCR6	T Cell	0.00251891	0.0673904	1.3	2.47	6.77	5.46
23413_at	23413	LOC23413	NCS1	NA	0.00251778	0.0673904	-0.52	0.7	4.65	5.17
80380_at	80380	LOC80380	PDCD1LG2	Dendritic Cell	0.00249208	0.0669321	1.1	2.14	5.67	4.57
284340_at	284340	LOC284340	CXCL17	NA	0.00248704	0.0669269	0.41	1.33	3.08	2.67
2769_at	2769	LOC2769	GNA15	Monocyte	0.00246765	0.0665349	0.59	1.51	4.08	3.48
9473_at	9473	LOC9473	THEMIS2	Myeloid	0.0024444	0.066037	0.82	1.76	4.95	4.13
1646_at	1646	LOC1646	AKR1C2	NA	0.00243739	0.0659768	-1.71	0.31	4.63	6.33
952_at	952	LOC952	CD38	Multiple	0.00243725	0.0659768	1.33	2.52	4.86	3.53
1979_at	1979	LOC1979	EIF4EBP2	NA	0.00241945	0.0659241	-0.49	0.71	7.5	7.98
9404_at	9404	LOC9404	LPXN	Multiple	0.00241326	0.0659241	0.89	1.85	5.35	4.47
158158_at	158158	LOC158158	RASEF	NA	0.00242589	0.0659241	-1.25	0.42	4.62	5.87
58476_at	58476	LOC58476	TP53INP2	NA	0.00240389	0.0659241	-0.64	0.64	5.84	6.48
158880_at	158880	LOC158880	USP51	NA	0.00242257	0.0659241	-0.33	0.79	3.3	3.63
340152_at	340152	LOC340152	ZC3H12D	NA	0.00239162	0.0657695	0.36	1.28	3.29	2.94
55970_at	55970	LOC55970	GNG12	NA	0.00237406	0.065417	-0.66	0.63	6.99	7.64
57580_at	57580	LOC57580	PREX1	Multiple	0.002348	0.0649582	0.8	1.74	5.25	4.45
55957_at	55957	LOC55957	LIN37	NA	0.00234103	0.0648954	0.4	1.32	4.67	4.27
55175_at	55175	LOC55175	KLHL11	NA	0.00233579	0.0648803	-0.54	0.69	5.96	6.5
92092_at	92092	LOC92092	ZC3HAV1L	NA	0.00228515	0.0641189	-0.86	0.55	6.14	7
152007_at	152007	LOC152007	GLIPR2	Multiple	0.00226732	0.0639681	0.92	1.89	7.44	6.52
10379_at	10379	LOC10379	IRF9	NA	0.00227051	0.0639681	0.51	1.43	6.24	5.73
865_at	865	LOC865	CBFB	NA	0.00224083	0.0635207	0.42	1.33	7.24	6.82
177_at	177	LOC177	AGER	NA	0.00221702	0.0632346	0.36	1.29	3.36	3
55843_at	55843	LOC55843	ARHGAP15	Multiple	0.00219141	0.0632346	0.81	1.75	7.36	6.55
51008_at	51008	LOC51008	ASCC1	NA	0.00222369	0.0632346	-0.54	0.69	6.15	6.69
1952_at	1952	LOC1952	CELSR2	NA	0.00221203	0.0632346	-0.97	0.51	5	5.97
729830_at	729830	LOC729830	FAM160A1	NA	0.00219472	0.0632346	-1.29	0.41	4.24	5.53
5329_at	5329	LOC5329	PLAUR	Monocyte	0.00222616	0.0632346	1.25	2.38	6.56	5.31
7443_at	7443	LOC7443	VRK1	NA	0.00222052	0.0632346	0.58	1.5	7.33	6.75
64127_at	64127	LOC64127	NOD2	NA	0.00218467	0.0632272	0.55	1.47	3.19	2.63
132332_at	132332	LOC132332	TMEM155	NA	0.00217319	0.0631565	0.93	1.91	2.96	2.02
7185_at	7185	LOC7185	TRAF1	Myeloid	0.00217766	0.0631565	0.61	1.53	4	3.39
11275_at	11275	LOC11275	KLHL2	NA	0.00216139	0.0630823	0.57	1.48	6.32	5.75
9402_at	9402	LOC9402	GRAP2	NA	0.00213694	0.0626336	0.79	1.73	4.84	4.05
2036_at	2036	LOC2036	EPB41L1	NA	0.002127	0.0624748	-0.95	0.52	5.89	6.84
5217_at	5217	LOC5217	PFN2	NA	0.00211496	0.0622731	-0.66	0.63	5.72	6.37
9372_at	9372	LOC9372	ZFYVE9	NA	0.00211562	0.0622731	-0.53	0.69	5.01	5.54
10891_at	10891	LOC10891	PPARGC1A	NA	0.00210587	0.0622516	-1.83	0.28	4.32	6.16
712_at	712	LOC712	C1QA	NA	0.00204907	0.0608329	0.97	1.96	6.83	5.86
1540_at	1540	LOC1540	CYLD	Multiple	0.00204472	0.0608329	0.48	1.39	5.22	4.74
1522_at	1522	LOC1522	CTSZ	Myeloid	0.00200054	0.0608161	0.81	1.75	8.49	7.68
256710_at	256710	LOC256710	GLIPR1L1	NA	0.00202765	0.0608161	0.4	1.32	3.82	3.42
3326_at	3326	LOC3326	HSP90AB1	NA	0.00203969	0.0608161	-0.47	0.72	10.49	10.96
4056_at	4056	LOC4056	LTC4S	NA	0.00201613	0.0608161	0.34	1.27	3.01	2.67
57192_at	57192	LOC57192	MCOLN1	Lymphoid	0.0020291	0.0608161	0.49	1.41	6.44	5.95
84451_at	84451	LOC84451	MLK4	NA	0.00200906	0.0608161	-1.24	0.42	4.96	6.2
29108_at	29108	LOC29108	PYCARD	NA	0.00202641	0.0608161	0.56	1.47	5.49	4.93
391_at	391	LOC391	RHOG	Myeloid	0.00199808	0.0608161	0.61	1.53	6.39	5.78
126638_at	126638	LOC126638	RPTN	NA	0.00203245	0.0608161	0.34	1.26	2.23	1.89
7538_at	7538	LOC7538	ZFP36	NA	0.0020382	0.0608161	0.74	1.67	6.66	5.92
23743_at	23743	LOC23743	BHMT2	NA	0.00197811	0.0606625	-1.67	0.31	5.77	7.44
23533_at	23533	LOC23533	PIK3R5	Multiple	0.00197566	0.0606625	0.89	1.86	5.62	4.73
252983_at	252983	LOC252983	STXBP4	NA	0.00197075	0.0606625	-0.61	0.65	4.7	5.31
57678_at	57678	LOC57678	GPAM	NA	0.00195682	0.0605676	-0.91	0.53	4.31	5.21
64859_at	64859	LOC64859	NABP1	Multiple	0.00196116	0.0605676	0.98	1.97	7.54	6.56
63940_at	63940	LOC63940	GPSM3	NA	0.00195078	0.060518	0.94	1.92	6.41	5.47
9938_at	9938	LOC9938	ARHGAP25	Multiple	0.00191469	0.0595321	0.96	1.94	7.25	6.29
2885_at	2885	LOC2885	GRB2	Multiple	0.00190469	0.0595321	0.5	1.41	8.16	7.67
2995_at	2995	LOC2995	GYPC	NA	0.00191395	0.0595321	0.75	1.69	9.4	8.65
11006_at	11006	LOC11006	LILRB4	NA	0.00189255	0.0595321	1.06	2.08	5.17	4.12
22861_at	22861	LOC22861	NLRP1	NA	0.00190959	0.0595321	0.69	1.61	4	3.31
144348_at	144348	LOC144348	ZNF664	NA	0.0019034	0.0595321	-0.46	0.73	7.2	7.66
2444_at	2444	LOC2444	FRK	NA	0.00186748	0.0591298	-0.92	0.53	4.34	5.27
11344_at	11344	LOC11344	TWF2	NA	0.00185756	0.0591298	0.55	1.47	6.02	5.47
430_at	430	LOC430	ASCL2	NA	0.0018426	0.0588822	0.55	1.47	5.89	5.34
201633_at	201633	LOC201633	TIGIT	Lymphoid	0.00183412	0.0587472	0.97	1.95	4.23	3.26
945_at	945	LOC945	CD33	NA	0.00182757	0.0586735	0.54	1.46	3.86	3.32
55320_at	55320	LOC55320	MIS18BP1	Multiple	0.00181894	0.0585324	0.54	1.46	5.74	5.2
2290_at	2290	LOC2290	FOXG1	NA	0.001808	0.0584529	0.41	1.33	2.75	2.34
10744_at	10744	LOC10744	PTTG2	NA	0.00180753	0.0584529	0.64	1.56	3.88	3.24
9023_at	9023	LOC9023	CH25H	NA	0.0017691	0.0580915	0.6	1.51	3.42	2.83
1874_at	1874	LOC1874	E2F4	NA	0.00176138	0.0580915	0.39	1.31	5.43	5.04
3141_at	3141	LOC3141	HLCS	NA	0.00175329	0.0580915	-0.47	0.72	3.92	4.39
3937_at	3937	LOC3937	LCP2	Multiple	0.00177146	0.0580915	1.16	2.23	8.18	7.02
5880_at	5880	LOC5880	RAC2	Multiple	0.00175942	0.0580915	1.28	2.42	7.38	6.1
4068_at	4068	LOC4068	SH2D1A	NA	0.0017793	0.0580915	1.33	2.51	4.83	3.5
53346_at	53346	LOC53346	TM6SF1	Multiple	0.00178275	0.0580915	0.64	1.56	5.11	4.48
3981_at	3981	LOC3981	LIG4	NA	0.00171911	0.0578673	0.38	1.3	3.09	2.71
55607_at	55607	LOC55607	PPP1R9A	NA	0.00172306	0.0578673	-1.22	0.43	3.96	5.18
6672_at	6672	LOC6672	SP100	Lymphoid	0.00172701	0.0578673	0.48	1.4	7.45	6.96
387357_at	387357	LOC387357	THEMIS	NA	0.00171724	0.0578673	1.33	2.52	5.77	4.43
146223_at	146223	LOC146223	CMTM4	NA	0.00169588	0.0573814	-0.7	0.62	4.84	5.54
64087_at	64087	LOC64087	MCCC2	NA	0.00169115	0.0573619	-0.81	0.57	6.66	7.47
1759_at	1759	LOC1759	DNM1	NA	0.00168212	0.0573374	-0.81	0.57	3.89	4.7
84628_at	84628	LOC84628	NTNG2	NA	0.0016603	0.0567338	0.75	1.68	5.68	4.93
7456_at	7456	LOC7456	WIPF1	Multiple	0.0016442	0.056323	0.79	1.72	8.05	7.26
25911_at	25911	LOC25911	DPCD	NA	0.00163534	0.0561588	-1	0.5	6.57	7.56
9447_at	9447	LOC9447	AIM2	Lymphoid	0.00162152	0.0560874	1.82	3.54	6.99	5.17
80709_at	80709	LOC80709	AKNA	Multiple	0.00160913	0.0560874	0.6	1.51	3.8	3.21
3600_at	3600	LOC3600	IL15	Myeloid	0.00162572	0.0560874	0.63	1.55	3.76	3.14
2185_at	2185	LOC2185	PTK2B	NA	0.00162317	0.0560874	0.63	1.54	4.6	3.98
91351_at	91351	LOC91351	DDX60L	Myeloid	0.00158664	0.0555336	0.79	1.73	6.33	5.53
56061_at	56061	LOC56061	UBFD1	NA	0.0015884	0.0555336	-0.63	0.65	6.62	7.25
10712_at	10712	LOC10712	FAM189B	NA	0.00156203	0.0555024	-0.56	0.68	6.76	7.32
84957_at	84957	LOC84957	RELT	Myeloid	0.00157356	0.0555024	0.55	1.46	4.12	3.57
10870_at	10870	LOC10870	HCST	Multiple	0.00153963	0.0552213	0.99	1.99	6.37	5.38
114569_at	114569	LOC114569	MAL2	NA	0.00154004	0.0552213	-1.76	0.3	4.47	6.23
115_at	115	LOC115	ADCY9	NA	0.00152486	0.0551064	-0.61	0.65	5.29	5.91
221937_at	221937	LOC221937	FOXK1	NA	0.00151128	0.0549619	-0.35	0.78	4.98	5.33
3133_at	3133	LOC3133	HLA-E	NA	0.00149829	0.0549619	0.62	1.54	9.53	8.91
3614_at	3614	LOC3614	IMPDH1	NA	0.00150532	0.0549619	0.52	1.43	4.4	3.89
92822_at	92822	LOC92822	ZNF276	NA	0.00151208	0.0549619	0.4	1.32	3.87	3.48
121273_at	121273	LOC121273	C12ORF54	NA	0.00146842	0.0544519	0.32	1.25	2.68	2.36
3559_at	3559	LOC3559	IL2RA	Multiple	0.00147519	0.0544519	1.16	2.23	5.29	4.13
51172_at	51172	LOC51172	NAGPA	Dendritic Cell	0.00147285	0.0544519	0.34	1.27	4.45	4.11
10128_at	10128	LOC10128	LRPPRC	NA	0.00144813	0.0538852	-0.54	0.69	6.25	6.78
7566_at	7566	LOC7566	ZNF18	NA	0.00144045	0.0537444	0.41	1.33	3.54	3.13
2353_at	2353	LOC2353	FOS	NA	0.00142864	0.0536287	0.8	1.74	3.51	2.71
2354_at	2354	LOC2354	FOSB	NA	0.00141842	0.0536287	0.66	1.58	4.43	3.77
22882_at	22882	LOC22882	ZHX2	NA	0.0014248	0.0536287	-0.66	0.63	8.88	9.54
56882_at	56882	LOC56882	CDC42SE1	Multiple	0.00140836	0.0534133	0.55	1.47	7.46	6.9
4498_at	4498	LOC4498	MT1JP	NA	0.00139814	0.0531894	0.38	1.3	3.05	2.67
6856_at	6856	LOC6856	SYPL1	NA	0.00139861	0.0531894	-0.55	0.68	8.65	9.2
2634_at	2634	LOC2634	GBP2	Multiple	0.00138341	0.0529029	0.63	1.55	10.08	9.45
1234_at	1234	LOC1234	CCR5	Multiple	0.00136093	0.0526622	1.34	2.53	6.05	4.72
3587_at	3587	LOC3587	IL10RA	Multiple	0.00137224	0.0526622	0.68	1.6	4.05	3.37
55353_at	55353	LOC55353	LAPTM4B	NA	0.00137145	0.0526622	-0.82	0.57	7.76	8.58
81030_at	81030	LOC81030	ZBP1	Lymphoid	0.00136551	0.0526622	0.53	1.44	3.63	3.1
83605_at	83605	LOC83605	CCM2	NA	0.00134052	0.0524244	0.4	1.32	4.35	3.95
11186_at	11186	LOC11186	RASSF1	NA	0.00133165	0.0522256	0.39	1.31	4.32	3.94
147138_at	147138	LOC147138	TMC8	Lymphoid	0.00132243	0.0520118	0.49	1.41	3.58	3.09
4481_at	4481	LOC4481	MSR1	NA	0.00129549	0.0510976	0.98	1.97	7.32	6.34
387119_at	387119	LOC387119	CEP85L	NA	0.00126393	0.0499959	0.45	1.36	5.13	4.68
225_at	225	LOC225	ABCD2	NA	0.0012467	0.0497418	0.48	1.39	2.71	2.23
10287_at	10287	LOC10287	RGS19	Multiple	0.00123804	0.0495396	0.83	1.77	6.38	5.56
4689_at	4689	LOC4689	NCF4	Neutrophil	0.00123405	0.0495235	1.14	2.21	6.56	5.42
9034_at	9034	LOC9034	CCRL2	Monocyte	0.00122738	0.0494677	1.1	2.14	5.39	4.29
22823_at	22823	LOC22823	MTF2	NA	0.00122908	0.0494677	0.38	1.3	6.13	5.75
714_at	714	LOC714	C1QC	NA	0.00121501	0.0491884	0.95	1.93	8.66	7.71
192670_at	192670	LOC192670	AGO4	NA	0.0012092	0.0490971	0.55	1.47	4.99	4.44
3081_at	3081	LOC3081	HGD	NA	0.0012001	0.0490971	-1.86	0.28	5.93	7.79
54072_at	54072	LOC54072	LINC00158	Monocyte	0.00120914	0.0490971	0.71	1.63	3.08	2.37
5563_at	5563	LOC5563	PRKAA2	NA	0.00119304	0.0490971	-1.1	0.47	3.79	4.89
81929_at	81929	LOC81929	SEH1L	NA	0.00120053	0.0490971	-0.52	0.7	6.12	6.64
114836_at	114836	LOC114836	SLAMF6	NA	0.00120628	0.0490971	1.4	2.64	5.07	3.67
9840_at	9840	LOC9840	TESPA1	NA	0.00119588	0.0490971	0.84	1.79	4.15	3.32
7391_at	7391	LOC7391	USF1	NA	0.00118273	0.0490971	0.45	1.36	4.43	3.98
140_at	140	LOC140	ADORA3	NA	0.00116745	0.0489869	1.07	2.1	6.72	5.65
915_at	915	LOC915	CD3D	T Cell	0.00116715	0.0489869	1.66	3.15	7.73	6.07
83593_at	83593	LOC83593	RASSF5	Multiple	0.00115899	0.0489292	0.91	1.87	5.22	4.31
3965_at	3965	LOC3965	LGALS9	NA	0.00114734	0.0485859	0.84	1.79	6.21	5.37
100289455_at	100289455	LOC100289455	NA	NA	0.00114586	0.0485859	0.36	1.29	3.65	3.29
257106_at	257106	LOC257106	ARHGAP30	NA	0.00110598	0.0483569	1.08	2.11	5.65	4.58
695_at	695	LOC695	BTK	NA	0.00112563	0.0483569	0.58	1.5	3.24	2.66
57018_at	57018	LOC57018	CCNL1	NA	0.00112842	0.0483569	0.69	1.61	7.17	6.49
1230_at	1230	LOC1230	CCR1	Multiple	0.00113493	0.0483569	1.22	2.33	6.83	5.62
1441_at	1441	LOC1441	CSF3R	Myeloid	0.00111565	0.0483569	1.07	2.1	4.75	3.68
84923_at	84923	LOC84923	FAM104A	NA	0.00111621	0.0483569	0.46	1.37	6.62	6.17
54874_at	54874	LOC54874	FNBP1L	NA	0.00113194	0.0483569	-1.06	0.48	6.37	7.43
3635_at	3635	LOC3635	INPP5D	Multiple	0.00112411	0.0483569	0.65	1.57	5.2	4.54
166929_at	166929	LOC166929	SGMS2	NA	0.0011132	0.0483569	-0.5	0.71	4.48	4.98
914_at	914	LOC914	CD2	Lymphoid	0.00109052	0.0482518	1.21	2.31	5.59	4.38
4063_at	4063	LOC4063	LY9	Lymphoid	0.00108106	0.0479874	0.56	1.47	3.3	2.75
1606_at	1606	LOC1606	DGKA	T Cell	0.0010678	0.0475513	0.92	1.9	5.57	4.65
752_at	752	LOC752	FMNL1	Multiple	0.00106439	0.0475513	0.83	1.78	4.1	3.26
6928_at	6928	LOC6928	HNF1B	NA	0.00104915	0.0471344	-1.52	0.35	5.01	6.53
729238_at	729238	LOC729238	SFTPA2	NA	0.0010516	0.0471344	0.67	1.59	3	2.33
7716_at	7716	LOC7716	VEZF1	NA	0.00104499	0.0471344	-0.4	0.76	6.53	6.93
8477_at	8477	LOC8477	GPR65	Multiple	0.00103869	0.0470613	1	2	5.16	4.16
79668_at	79668	LOC79668	PARP8	Multiple	0.0010339	0.0470613	0.63	1.55	6.21	5.58
10235_at	10235	LOC10235	RASGRP2	Lymphoid	0.00103975	0.0470613	0.76	1.69	3.68	2.92
10939_at	10939	LOC10939	AFG3L2	NA	0.00101786	0.0469645	-0.67	0.63	5.54	6.21
489_at	489	LOC489	ATP2A3	NA	0.0010274	0.0469645	0.61	1.52	4.49	3.89
80774_at	80774	LOC80774	LIMD2	NA	0.0010049	0.0469645	1.06	2.08	8.24	7.19
389840_at	389840	LOC389840	MAP3K15	NA	0.00102584	0.0469645	-0.79	0.58	5.25	6.05
100286925_at	100286925	LOC100286925	NA	NA	0.00101512	0.0469645	0.45	1.36	3.64	3.19
5330_at	5330	LOC5330	PLCB2	NA	0.00100646	0.0469645	0.44	1.35	3.19	2.75
5778_at	5778	LOC5778	PTPN7	Lymphoid	0.000995185	0.0469645	0.45	1.37	3.12	2.67
55423_at	55423	LOC55423	SIRPG	NA	0.00101398	0.0469645	1.24	2.37	5.02	3.77
115362_at	115362	LOC115362	GBP5	Multiple	0.000985486	0.0467513	1.72	3.3	8.25	6.53
4542_at	4542	LOC4542	MYO1F	Multiple	0.000979651	0.0466347	1.1	2.14	6.76	5.66
55599_at	55599	LOC55599	RNPC3	NA	0.000969762	0.0464846	0.71	1.64	5.72	5.01
4650_at	4650	LOC4650	MYO9B	NA	0.000964454	0.0463912	0.43	1.35	3.66	3.23
337985_at	337985	LOC337985	KRTAP20-3	NA	0.000960059	0.0463413	0.34	1.26	3.28	2.94
969_at	969	LOC969	CD69	Lymphoid	0.000954582	0.0462386	1.55	2.93	5.6	4.05
10606_at	10606	LOC10606	PAICS	T Cell	0.000951329	0.0462386	-0.71	0.61	7.46	8.18
5873_at	5873	LOC5873	RAB27A	NA	0.000947493	0.0462386	0.75	1.68	6.84	6.09
5996_at	5996	LOC5996	RGS1	Multiple	0.000948891	0.0462386	1.69	3.24	5.94	4.25
9881_at	9881	LOC9881	TRANK1	NA	0.000942584	0.0462386	0.7	1.63	5.54	4.84
63925_at	63925	LOC63925	ZNF335	NA	0.000953752	0.0462386	0.44	1.36	3.42	2.98
171586_at	171586	LOC171586	ABHD3	NA	0.000906661	0.0450904	0.79	1.72	4.6	3.82
79415_at	79415	LOC79415	C17ORF62	Multiple	0.000899343	0.0449834	0.56	1.48	6.31	5.75
29844_at	29844	LOC29844	TFPT	NA	0.000897111	0.0449834	0.43	1.35	8.96	8.52
5973_at	5973	LOC5973	RENBP	NA	0.000886528	0.0449066	0.36	1.29	2.75	2.38
6385_at	6385	LOC6385	SDC4	NA	0.000890801	0.0449066	-1.13	0.46	6.99	8.12
286101_at	286101	LOC286101	ZNF252P	NA	0.000891302	0.0449066	-0.64	0.64	5.18	5.82
51449_at	51449	LOC51449	PCYOX1	NA	0.000871122	0.0443758	-0.71	0.61	6.8	7.51
133874_at	133874	LOC133874	C5ORF58	NA	0.000865267	0.0442408	0.49	1.41	2.84	2.35
54440_at	54440	LOC54440	SASH3	Multiple	0.00085679	0.0442408	1.1	2.14	5.5	4.4
23321_at	23321	LOC23321	TRIM2	NA	0.000863602	0.0442408	-1.13	0.46	5.4	6.54
9958_at	9958	LOC9958	USP15	Myeloid	0.000863058	0.0442408	0.55	1.46	7	6.45
9976_at	9976	LOC9976	CLEC2B	Multiple	0.000849039	0.0440638	0.99	1.99	8.2	7.21
3603_at	3603	LOC3603	IL16	Multiple	0.000845357	0.0440383	0.87	1.82	5.31	4.44
1731_at	1731	LOC1731	SEPT1	Lymphoid	0.000805403	0.0422871	0.93	1.91	4.82	3.89
23059_at	23059	LOC23059	CLUAP1	NA	0.000805496	0.0422871	-0.56	0.68	5.09	5.65
2124_at	2124	LOC2124	EVI2B	Multiple	0.000797326	0.0422871	1.2	2.3	8.22	7.02
4277_at	4277	LOC4277	MICB	NA	0.000795372	0.0422871	0.45	1.37	4.06	3.61
26191_at	26191	LOC26191	PTPN22	Multiple	0.000805615	0.0422871	1.16	2.23	4.36	3.2
1844_at	1844	LOC1844	DUSP2	T Cell	0.000769069	0.0413112	0.35	1.28	3.14	2.79
6352_at	6352	LOC6352	CCL5	Multiple	0.000764552	0.0412522	1.6	3.03	8.69	7.09
79970_at	79970	LOC79970	ZNF767	NA	0.000764983	0.0412522	0.61	1.52	3.97	3.37
57489_at	57489	LOC57489	ODF2L	NA	0.000757399	0.0411649	0.76	1.69	5.97	5.21
80714_at	80714	LOC80714	PBX4	NA	0.000750991	0.040978	0.56	1.48	3.92	3.36
23659_at	23659	LOC23659	PLA2G15	NA	0.000750241	0.040978	0.33	1.26	4.9	4.57
84250_at	84250	LOC84250	ANKRD32	NA	0.000742431	0.040976	0.66	1.58	6.4	5.74
6843_at	6843	LOC6843	VAMP1	NA	0.000736222	0.040976	0.4	1.32	3.27	2.86
7454_at	7454	LOC7454	WAS	Multiple	0.000745019	0.040976	0.79	1.73	5.31	4.52
149992_at	149992	LOC149992	ANKRD30BP2	NA	0.000727269	0.0406475	0.46	1.38	3.41	2.94
283870_at	283870	LOC283870	BRICD5	NA	0.00072577	0.0406475	0.45	1.37	4.87	4.42
1796_at	1796	LOC1796	DOK1	NA	0.000720179	0.0406475	0.48	1.39	4.11	3.64
23633_at	23633	LOC23633	KPNA6	NA	0.000721932	0.0406475	-0.56	0.68	6.55	7.11
253558_at	253558	LOC253558	LCLAT1	NA	0.000716258	0.0406475	-0.7	0.61	6.14	6.84
51719_at	51719	LOC51719	CAB39	Multiple	0.000708262	0.0406082	0.49	1.41	8.33	7.83
80169_at	80169	LOC80169	CTC1	NA	0.000709519	0.0406082	0.34	1.27	3.4	3.06
286336_at	286336	LOC286336	FAM78A	NA	0.000685947	0.0406082	0.77	1.71	4.43	3.66
4125_at	4125	LOC4125	MAN2B1	NA	0.000700622	0.0406082	0.71	1.64	7.04	6.33
80896_at	80896	LOC80896	NPL	Myeloid	0.000690308	0.0406082	1.27	2.41	6.94	5.67
5293_at	5293	LOC5293	PIK3CD	Multiple	0.000699768	0.0406082	0.67	1.6	4.16	3.49
684959_at	684959	LOC684959	SNORA25	NA	0.000701791	0.0406082	1.74	3.35	6.92	5.18
8764_at	8764	LOC8764	TNFRSF14	NA	0.000685645	0.0406082	0.37	1.29	5.3	4.93
1495_at	1495	LOC1495	CTNNA1	NA	0.000660902	0.0396685	-0.35	0.78	8.87	9.22
90427_at	90427	LOC90427	BMF	NA	0.000637395	0.0390496	0.52	1.43	4.71	4.19
25900_at	25900	LOC25900	IFFO1	NA	0.000639277	0.0390496	0.38	1.3	3.85	3.46
5551_at	5551	LOC5551	PRF1	Lymphoid	0.000633167	0.0390217	1.2	2.3	5.7	4.5
57095_at	57095	LOC57095	PITHD1	NA	0.000620788	0.0384304	0.44	1.35	7.08	6.64
9942_at	9942	LOC9942	XYLB	NA	0.000620581	0.0384304	-0.84	0.56	4.4	5.24
3702_at	3702	LOC3702	ITK	Lymphoid	0.000614646	0.0383945	1	2	4.37	3.37
4818_at	4818	LOC4818	NKG7	Lymphoid	0.000612039	0.0383945	1.48	2.8	7.9	6.42
8530_at	8530	LOC8530	CST7	Multiple	0.000603149	0.0381948	1.64	3.12	7.6	5.96
165631_at	165631	LOC165631	PARP15	NA	0.000597574	0.0380161	0.77	1.71	3.18	2.41
944_at	944	LOC944	TNFSF8	Multiple	0.000583173	0.0375209	0.87	1.82	4.65	3.78
8321_at	8321	LOC8321	FZD1	NA	0.000576837	0.037386	-0.78	0.58	6.39	7.17
100287036_at	100287036	LOC100287036	AC137932.6	NA	0.000569795	0.0371038	0.46	1.37	3.69	3.23
339479_at	339479	LOC339479	BRINP3	NA	0.000557819	0.0371038	0.36	1.28	2.77	2.41
79718_at	79718	LOC79718	TBL1XR1	Multiple	0.000559181	0.0371038	-0.52	0.7	8.14	8.66
10346_at	10346	LOC10346	TRIM22	NA	0.000567832	0.0371038	0.8	1.74	8.35	7.55
64744_at	64744	LOC64744	SMAP2	Multiple	0.000548688	0.0369494	0.96	1.95	7.54	6.58
84446_at	84446	LOC84446	BRSK1	NA	0.00053125	0.0361276	0.59	1.5	4.29	3.7
718_at	718	LOC718	C3	NA	0.000524922	0.0360631	-0.91	0.53	10.04	10.95
23468_at	23468	LOC23468	CBX5	Multiple	0.00051764	0.0360631	-0.54	0.69	8.1	8.65
1829_at	1829	LOC1829	DSG2	NA	0.00052769	0.0360631	-1.71	0.31	4.67	6.38
144110_at	144110	LOC144110	TMEM86A	NA	0.000526517	0.0360631	0.5	1.41	4.51	4.01
8676_at	8676	LOC8676	STX11	Multiple	0.00051139	0.0358362	0.75	1.68	4.29	3.55
162_at	162	LOC162	AP1B1	NA	0.000507082	0.0357156	0.39	1.31	6.06	5.67
5922_at	5922	LOC5922	RASA2	Lymphoid	0.000504636	0.0357156	0.69	1.61	5.55	4.86
4233_at	4233	LOC4233	MET	NA	0.000481401	0.0347944	-1.12	0.46	6.5	7.62
10413_at	10413	LOC10413	YAP1	NA	0.000471948	0.0342907	-0.82	0.57	5.7	6.52
22870_at	22870	LOC22870	PPP6R1	NA	0.000456639	0.0335313	0.57	1.49	6.72	6.15
343099_at	343099	LOC343099	CCDC18	NA	0.00043805	0.0334042	0.53	1.44	4.92	4.4
6368_at	6368	LOC6368	CCL23	NA	0.000445198	0.0334042	0.58	1.49	2.94	2.36
81565_at	81565	LOC81565	NDEL1	NA	0.00044912	0.0334042	0.53	1.45	5.77	5.23
5734_at	5734	LOC5734	PTGER4	NA	0.000452488	0.0334042	0.8	1.74	5.24	4.44
342618_at	342618	LOC342618	SLFN14	NA	0.000448431	0.0334042	0.39	1.31	2.5	2.11
64919_at	64919	LOC64919	BCL11B	T Cell	0.000434645	0.0333348	1.27	2.41	4.55	3.28
5729_at	5729	LOC5729	PTGDR	NK Cell	0.000425807	0.0331756	0.43	1.34	2.81	2.38
25937_at	25937	LOC25937	WWTR1	NA	0.000418593	0.0331756	-0.46	0.73	8.39	8.84
84124_at	84124	LOC84124	ZNF394	NA	0.000427762	0.0331756	0.36	1.29	5.4	5.04
149628_at	149628	LOC149628	PYHIN1	NA	0.000408398	0.0325892	1.1	2.14	5.61	4.51
57101_at	57101	LOC57101	ANO2	NA	0.000400645	0.0321564	0.71	1.63	3.32	2.61
940_at	940	LOC940	CD28	NA	0.000390203	0.0316555	1.02	2.03	4.68	3.66
29982_at	29982	LOC29982	NRBF2	Neutrophil	0.000389607	0.0316555	0.64	1.56	7	6.36
132160_at	132160	LOC132160	PPM1M	Multiple	0.000392111	0.0316555	0.78	1.71	5.67	4.9
9489_at	9489	LOC9489	PGS1	NA	0.000369132	0.0303325	0.33	1.26	3.03	2.7
9047_at	9047	LOC9047	SH2D2A	Lymphoid	0.000366782	0.0303325	0.66	1.58	3.45	2.79
139322_at	139322	LOC139322	APOOL	NA	0.000353552	0.0296886	-0.5	0.71	7.81	8.31
8320_at	8320	LOC8320	EOMES	Lymphoid	0.000354844	0.0296886	1.16	2.24	4.36	3.2
55007_at	55007	LOC55007	FAM118A	NA	0.000350269	0.0296886	0.66	1.58	5.85	5.19
51135_at	51135	LOC51135	IRAK4	NA	0.000346338	0.0296886	0.42	1.34	5.35	4.93
9910_at	9910	LOC9910	RABGAP1L	NA	0.000351958	0.0296886	0.86	1.81	7.85	6.99
55012_at	55012	LOC55012	PPP2R3C	NA	0.000340239	0.0295408	0.73	1.66	7.07	6.33
254102_at	254102	LOC254102	EHBP1L1	NA	0.000337433	0.0294826	0.73	1.66	4.32	3.59
84166_at	84166	LOC84166	NLRC5	Multiple	0.000330635	0.0290737	1.04	2.06	5.1	4.05
10673_at	10673	LOC10673	TNFSF13B	Myeloid	0.000330646	0.0290737	1.22	2.33	8.27	7.04
348378_at	348378	LOC348378	FAM159A	NA	0.000325725	0.0290105	0.51	1.42	3.39	2.88
5790_at	5790	LOC5790	PTPRCAP	Lymphoid	0.00029735	0.0266553	1.19	2.29	6.35	5.16
388931_at	388931	LOC388931	MFSD2B	NA	0.000281083	0.0253617	0.36	1.29	2.82	2.46
64333_at	64333	LOC64333	ARHGAP9	Multiple	0.000273055	0.024861	0.93	1.9	4.95	4.02
9267_at	9267	LOC9267	CYTH1	Multiple	0.000269468	0.0248603	0.66	1.58	5.89	5.23
152789_at	152789	LOC152789	JAKMIP1	NA	0.000267184	0.0248603	0.71	1.63	3.24	2.53
10787_at	10787	LOC10787	NCKAP1	NA	0.000270123	0.0248603	-0.63	0.64	7.77	8.41
23616_at	23616	LOC23616	SH3BP1	NA	0.00025747	0.0241794	0.56	1.47	4.32	3.77
1130_at	1130	LOC1130	LYST	Multiple	0.00025477	0.0240897	0.97	1.95	6.52	5.55
65981_at	65981	LOC65981	CAPRIN2	NA	0.000250068	0.0238081	0.7	1.63	5.09	4.39
653509_at	653509	LOC653509	SFTPA1	NA	0.000239394	0.0229502	0.87	1.83	2.84	1.97
51411_at	51411	LOC51411	BIN2	Multiple	0.000237264	0.0229051	1.38	2.6	6.93	5.55
131450_at	131450	LOC131450	CD200R1	NA	0.000220547	0.022207	0.83	1.78	3.03	2.2
924_at	924	LOC924	CD7	Lymphoid	0.000215612	0.022207	0.5	1.42	3.8	3.3
56253_at	56253	LOC56253	CRTAM	Multiple	0.000220565	0.022207	1.33	2.51	4.71	3.38
1445_at	1445	LOC1445	CSK	Multiple	0.000228425	0.022207	0.6	1.51	5.65	5.06
27128_at	27128	LOC27128	CYTH4	Multiple	0.000226778	0.022207	0.62	1.54	4.11	3.49
170575_at	170575	LOC170575	GIMAP1	Multiple	0.00022359	0.022207	0.51	1.43	4.6	4.09
3004_at	3004	LOC3004	GZMM	Lymphoid	0.000223193	0.022207	0.45	1.37	3.62	3.17
3726_at	3726	LOC3726	JUNB	NA	0.000225013	0.022207	0.52	1.44	5.55	5.03
5858_at	5858	LOC5858	PZP	NA	0.000216348	0.022207	0.9	1.86	4.09	3.19
6440_at	6440	LOC6440	SFTPC	NA	0.000220741	0.022207	0.43	1.35	2.85	2.41
80342_at	80342	LOC80342	TRAF3IP3	Multiple	0.000221585	0.022207	0.87	1.83	5.34	4.47
145508_at	145508	LOC145508	CEP128	NA	0.000205356	0.0220634	0.72	1.65	4.74	4.02
51131_at	51131	LOC51131	PHF11	NA	0.00019631	0.0215084	0.56	1.48	6.25	5.68
351_at	351	LOC351	APP	NA	0.000185526	0.0205486	-0.55	0.68	9.93	10.48
3002_at	3002	LOC3002	GZMB	Lymphoid	0.000184806	0.0205486	1.85	3.62	7.01	5.15
7409_at	7409	LOC7409	VAV1	NA	0.000186061	0.0205486	1.13	2.19	5.72	4.59
94039_at	94039	LOC94039	ZNF101	Lymphoid	0.000182538	0.0205486	0.93	1.9	5.85	4.92
1326_at	1326	LOC1326	MAP3K8	Multiple	0.000177401	0.0202398	0.7	1.63	4.02	3.32
22900_at	22900	LOC22900	CARD8	NA	0.000173925	0.0200085	0.69	1.62	6.55	5.86
8462_at	8462	LOC8462	KLF11	NA	0.000172623	0.0200085	-0.46	0.73	6.63	7.09
23604_at	23604	LOC23604	DAPK2	NA	0.000168921	0.0197624	0.61	1.53	4.66	4.05
7862_at	7862	LOC7862	BRPF1	NA	0.000158804	0.0188399	0.44	1.36	3.75	3.31
10865_at	10865	LOC10865	ARID5A	NA	0.000149652	0.0186334	0.43	1.34	5.26	4.83
29121_at	29121	LOC29121	CLEC2D	Multiple	0.000154789	0.0186334	1.25	2.37	6.39	5.14
1521_at	1521	LOC1521	CTSW	Lymphoid	0.000149298	0.0186334	1.23	2.35	5.18	3.95
83706_at	83706	LOC83706	FERMT3	Multiple	0.000152188	0.0186334	0.94	1.92	5.57	4.63
2672_at	2672	LOC2672	GFI1	NA	0.000154364	0.0186334	0.78	1.71	4.84	4.06
54442_at	54442	LOC54442	KCTD5	NA	0.000154004	0.0186334	0.36	1.29	3.76	3.4
4756_at	4756	LOC4756	NEO1	NA	0.000155222	0.0186334	-1.01	0.5	4.94	5.94
164118_at	164118	LOC164118	TTC24	NA	0.000150933	0.0186334	0.47	1.38	2.89	2.42
164668_at	164668	LOC164668	APOBEC3H	NA	0.000140365	0.0181938	0.4	1.32	3.96	3.56
79621_at	79621	LOC79621	RNASEH2B	NA	0.000141017	0.0181938	0.67	1.6	6.52	5.85
28737_at	28737	LOC28737	TRAJ18	T Cell	0.000140457	0.0181938	0.87	1.82	3.48	2.62
6351_at	6351	LOC6351	CCL4	Multiple	0.000127014	0.0171436	1.23	2.34	9.35	8.12
79670_at	79670	LOC79670	ZCCHC6	Multiple	0.00012791	0.0171436	0.74	1.67	7.13	6.4
117289_at	117289	LOC117289	TAGAP	NA	0.000123163	0.0170027	1.16	2.24	5.36	4.2
84225_at	84225	LOC84225	ZMYND15	NA	0.000116904	0.0163017	0.45	1.36	3.14	2.69
4242_at	4242	LOC4242	MFNG	Multiple	0.000113115	0.0159342	0.46	1.38	4.64	4.18
9046_at	9046	LOC9046	DOK2	NA	0.00010891	0.0155	0.78	1.72	4.49	3.71
11035_at	11035	LOC11035	RIPK3	NA	0.000107974	0.0155	0.33	1.26	2.82	2.49
343413_at	343413	LOC343413	FCRL6	NA	0.000105945	0.0154426	0.62	1.53	3.86	3.24
64092_at	64092	LOC64092	SAMSN1	Multiple	0.000102994	0.0154426	1.42	2.68	6.97	5.55
6303_at	6303	LOC6303	SAT1	NA	0.000105426	0.0154426	0.7	1.62	10.19	9.5
6494_at	6494	LOC6494	SIPA1	NA	0.00010627	0.0154426	0.57	1.49	4.97	4.4
23286_at	23286	LOC23286	WWC1	NA	9.72052e-05	0.0148004	-1.72	0.3	5.56	7.29
939_at	939	LOC939	CD27	Lymphoid	9.28841e-05	0.0144075	1.37	2.58	5.72	4.35
5148_at	5148	LOC5148	PDE6G	NA	8.94693e-05	0.0140355	0.48	1.39	4.3	3.82
1233_at	1233	LOC1233	CCR4	NA	8.65555e-05	0.0138133	0.52	1.43	3.68	3.16
51678_at	51678	LOC51678	MPP6	NA	8.46017e-05	0.0138133	-1.01	0.5	5.39	6.4
9217_at	9217	LOC9217	VAPB	NA	8.55226e-05	0.0138133	-0.53	0.69	6.38	6.91
6355_at	6355	LOC6355	CCL8	Multiple	8.16358e-05	0.0137325	1.78	3.43	5.79	4.01
113730_at	113730	LOC113730	KLHDC7B	NA	8.25644e-05	0.0137325	0.65	1.57	4.26	3.61
57057_at	57057	LOC57057	TBX20	NA	7.90703e-05	0.0134761	0.73	1.66	3.93	3.2
130540_at	130540	LOC130540	ALS2CR12	NA	7.7349e-05	0.013435	0.69	1.61	3.73	3.04
80114_at	80114	LOC80114	BICC1	NA	7.78561e-05	0.013435	-1.11	0.46	5.37	6.48
657_at	657	LOC657	BMPR1A	NA	7.43284e-05	0.013189	-1.02	0.49	5.36	6.38
55262_at	55262	LOC55262	C7ORF43	NA	7.45196e-05	0.013189	0.45	1.37	4.01	3.56
926_at	926	LOC926	CD8B	T Cell	7.12558e-05	0.013189	1.46	2.75	4.51	3.05
1145_at	1145	LOC1145	CHRNE	NA	7.42355e-05	0.013189	0.42	1.34	3.76	3.34
729862_at	NA	NA	LSP1 || RP11-14N7.2 || ? || LSP1P3 || ? || ?	NA	7.43131e-05	0.013189	0.57	1.49	7.59	7.01
9033_at	9033	LOC9033	PKD2L1	NA	7.38701e-05	0.013189	1.09	2.13	4.98	3.89
55133_at	55133	LOC55133	SRBD1	NA	7.08163e-05	0.013189	0.34	1.27	6.1	5.76
284415_at	284415	LOC284415	VSTM1	NA	6.7987e-05	0.013189	0.82	1.76	3.67	2.86
10538_at	10538	LOC10538	BATF	Lymphoid	6.5602e-05	0.0131251	1.19	2.28	5.45	4.25
8976_at	8976	LOC8976	WASL	NA	6.45542e-05	0.0131054	-0.64	0.64	5.26	5.9
333929_at	333929	LOC333929	SNAI3	NA	6.31401e-05	0.0130097	0.41	1.33	3.86	3.45
65986_at	65986	LOC65986	ZBTB10	NA	6.24154e-05	0.0130097	-0.81	0.57	5.22	6.03
79132_at	79132	LOC79132	DHX58	NA	5.94837e-05	0.0127596	0.35	1.27	3.57	3.22
1794_at	1794	LOC1794	DOCK2	Multiple	5.88991e-05	0.0127596	1.21	2.32	5.79	4.58
58499_at	58499	LOC58499	ZNF462	NA	6.00776e-05	0.0127596	-0.92	0.53	5.92	6.84
50619_at	50619	LOC50619	DEF6	Multiple	5.62458e-05	0.0127291	0.99	1.98	3.58	2.6
8418_at	8418	LOC8418	CMAHP	NA	5.40572e-05	0.0125485	0.93	1.9	4.21	3.29
4072_at	4072	LOC4072	EPCAM	NA	5.45391e-05	0.0125485	-2.98	0.13	4.64	7.61
197135_at	197135	LOC197135	PATL2	Lymphoid	5.2694e-05	0.0125485	0.58	1.5	3.59	3.01
5533_at	5533	LOC5533	PPP3CC	NA	5.36619e-05	0.0125485	0.76	1.69	6.53	5.77
923_at	923	LOC923	CD6	T Cell	4.99939e-05	0.0123244	0.33	1.26	2.89	2.56
375387_at	375387	LOC375387	NRROS	NA	4.50837e-05	0.0115256	0.65	1.57	4.69	4.04
8439_at	8439	LOC8439	NSMAF	Myeloid	4.41796e-05	0.0115075	0.59	1.51	5.47	4.88
9051_at	9051	LOC9051	PSTPIP1	NA	4.32976e-05	0.0114947	0.9	1.86	4.3	3.41
51291_at	51291	LOC51291	GMIP	Multiple	4.20642e-05	0.0113862	0.76	1.69	4.19	3.43
8514_at	8514	LOC8514	KCNAB2	NA	4.1508e-05	0.0113862	0.61	1.53	3.99	3.38
10943_at	10943	LOC10943	MSL3	NA	3.96167e-05	0.0113229	0.4	1.32	4.31	3.91
84174_at	84174	LOC84174	SLA2	NA	4.01901e-05	0.0113229	0.93	1.9	4.37	3.44
1410_at	1410	LOC1410	CRYAB	NA	3.55009e-05	0.0106541	-1.47	0.36	10.08	11.55
3932_at	3932	LOC3932	LCK	Lymphoid	3.62704e-05	0.0106541	0.99	1.99	4.63	3.64
100507254_at	100507254	LOC100507254	LINC01013	NA	3.62725e-05	0.0106541	0.54	1.45	3.15	2.61
57470_at	57470	LOC57470	LRRC47	NA	3.37646e-05	0.0105936	-0.6	0.66	8.07	8.67
441108_at	441108	LOC441108	C5ORF56	NA	3.09721e-05	0.00994349	0.65	1.57	4.05	3.4
128611_at	128611	LOC128611	ZNF831	NA	2.84292e-05	0.0093444	0.39	1.31	3.3	2.91
56288_at	56288	LOC56288	PARD3	NA	2.62632e-05	0.00933637	-0.67	0.63	4.64	5.31
166863_at	166863	LOC166863	RBM46	NA	2.68055e-05	0.00933637	0.33	1.26	2.34	2.01
266747_at	266747	LOC266747	RGL4	Multiple	2.53719e-05	0.00933637	0.89	1.86	4.51	3.62
115992_at	115992	LOC115992	RNF166	Multiple	2.77285e-05	0.00933637	0.46	1.37	3.84	3.38
53347_at	53347	LOC53347	UBASH3A	NA	2.71583e-05	0.00933637	0.43	1.34	3.2	2.78
112616_at	112616	LOC112616	CMTM7	NA	2.28639e-05	0.00928342	0.98	1.98	5.81	4.83
7535_at	7535	LOC7535	ZAP70	Lymphoid	2.17013e-05	0.00910248	0.61	1.53	3.87	3.26
55196_at	55196	LOC55196	KIAA1551	NA	1.95908e-05	0.00872422	0.96	1.95	8.27	7.31
3458_at	3458	LOC3458	IFNG	Lymphoid	1.86189e-05	0.00856777	1.42	2.68	4.13	2.71
26005_at	26005	LOC26005	C2CD3	NA	1.55638e-05	0.00763516	0.5	1.41	3.74	3.24
1956_at	1956	LOC1956	EGFR	NA	1.55289e-05	0.00763516	-1.49	0.36	5.74	7.23
2195_at	2195	LOC2195	FAT1	NA	1.39101e-05	0.00763516	-1.02	0.49	8.45	9.47
80316_at	80316	LOC80316	PPP1R2P9	NA	1.60391e-05	0.00763516	0.34	1.27	2.43	2.09
64926_at	64926	LOC64926	RASAL3	Lymphoid	1.47228e-05	0.00763516	1.01	2.02	5.38	4.37
115761_at	115761	LOC115761	ARL11	NA	1.2e-05	0.00740709	0.6	1.51	3.59	2.99
64170_at	64170	LOC64170	CARD9	NA	1.28772e-05	0.00740709	0.84	1.79	5.22	4.38
3695_at	3695	LOC3695	ITGB7	Lymphoid	1.09194e-05	0.00740709	0.73	1.66	4.9	4.17
6404_at	6404	LOC6404	SELPLG	Multiple	1.27077e-05	0.00740709	0.9	1.87	4.81	3.91
92799_at	92799	LOC92799	SHKBP1	Multiple	1.06036e-05	0.00740709	0.48	1.4	4.56	4.07
7003_at	7003	LOC7003	TEAD1	NA	1.21964e-05	0.00740709	-0.82	0.57	6.73	7.54
26127_at	26127	LOC26127	FGFR1OP2	NA	8.43904e-06	0.00685299	0.63	1.54	8.54	7.91
6348_at	6348	LOC6348	CCL3	Multiple	5.02254e-06	0.00468695	2.06	4.17	6.1	4.04
5900_at	5900	LOC5900	RALGDS	NA	5.09268e-06	0.00468695	0.77	1.71	4.94	4.17
55501_at	55501	LOC55501	CHST12	NK Cell	4.32937e-06	0.00459745	0.57	1.49	4.04	3.47
79037_at	79037	LOC79037	PVRIG	NA	3.84156e-06	0.00441939	1.54	2.91	8.12	6.58
124460_at	124460	LOC124460	SNX20	Multiple	3.26962e-06	0.00411271	0.33	1.26	3.02	2.68
374403_at	374403	LOC374403	TBC1D10C	Multiple	3.27706e-06	0.00411271	1.03	2.05	4.3	3.27
28688_at	28688	LOC28688	TRAV5	T Cell	2.09643e-06	0.00321569	0.79	1.73	3.4	2.61
7984_at	7984	LOC7984	ARHGEF5	NA	1.40776e-06	0.00311995	-1.3	0.41	5.88	7.18
158830_at	158830	LOC158830	CXORF65	NA	1.12446e-06	0.00311995	0.65	1.57	3.15	2.5
100131897_at	100131897	LOC100131897	FAM196B	NA	1.61849e-06	0.00311995	0.55	1.46	4.27	3.72
84967_at	84967	LOC84967	LSM10	NA	1.7086e-06	0.00311995	0.79	1.73	5.51	4.71
64098_at	64098	LOC64098	PARVG	Multiple	3.02295e-07	0.00311995	0.8	1.74	5.58	4.78
6708_at	6708	LOC6708	SPTA1	NA	1.16906e-06	0.00311995	0.85	1.81	3.23	2.38

## Sheet: S6 189Time.Response
Probeset	ENTREZ	LocusLink	Symbol	IRIS_Most_Specific	p.response	p.response.time	p.response28	DecLT20pc_Day0_GrpAvg	DecGE20pc_Day0_GrpAvg	DecLT20pc_Day28_GrpAvg	DecGE20pc_Day28_GrpAvg	Fold.Change.Resp	Fold.Change.NonResp
9619_at	9619	LOC9619	ABCG1	NA	0.00792844	0.00132313	0.0763211	7.47	7.45	7.54	7.95	1.41	1.06
57406_at	57406	LOC57406	ABHD6	NA	0.00435978	0.00919022	0.0146801	4.08	3.59	4.19	3.92	1.26	1.08
94_at	94	LOC94	ACVRL1	NA	0.0185405	0.00316887	0.301908	4.92	4.66	4.83	5.07	1.33	0.94
140_at	140	LOC140	ADORA3	NA	0.002765	0.00321778	0.00116745	5.64	5.85	5.65	6.72	1.83	1
1645_at	1645	LOC1645	AKR1C1	NA	0.00311061	0.00191106	0.00526145	7.79	7.23	7.78	5.96	0.41	0.99
1646_at	1646	LOC1646	AKR1C2	NA	0.00127214	0.000754158	0.00243739	6.14	5.69	6.33	4.63	0.48	1.14
57101_at	57101	LOC57101	ANO2	NA	0.000891314	0.000361196	0.000400645	2.77	2.58	2.61	3.32	1.67	0.9
316_at	316	LOC316	AOX1	NA	0.0147327	0.00462255	0.610159	5.7	6.09	5.86	5.26	0.56	1.12
323_at	323	LOC323	APBB2	NA	0.0103844	0.00355434	0.365499	5.56	5.58	5.48	5.19	0.76	0.94
7984_at	7984	LOC7984	ARHGEF5	NA	8.63907e-06	0.00010372	1.40776e-06	7.21	6.99	7.18	5.88	0.46	0.98
115761_at	115761	LOC115761	ARL11	NA	0.000111965	0.00314972	1.2e-05	2.94	3.13	2.99	3.59	1.38	1.04
379_at	379	LOC379	ARL4D	NA	0.0246906	0.00632338	0.316776	4.44	4.39	4.19	3.93	0.73	0.84
408_at	408	LOC408	ARRB1	NA	0.0169809	0.00533349	0.0184201	3.65	3.59	3.75	4.05	1.38	1.07
8853_at	8853	LOC8853	ASAP2	NA	0.0287086	0.00590658	0.125158	6.92	6.9	6.94	6.52	0.77	1.02
445_at	445	LOC445	ASS1	NA	0.000954935	0.000728649	0.0045686	6.91	6.42	6.87	5.75	0.63	0.97
28990_at	28990	LOC28990	ASTE1	NA	0.0304131	0.00509668	0.109382	4.76	4.44	4.67	5.07	1.55	0.94
23743_at	23743	LOC23743	BHMT2	NA	0.000692134	0.00056076	0.00197811	7.41	7.11	7.44	5.77	0.39	1.02
80114_at	80114	LOC80114	BICC1	NA	0.000345104	0.00323641	7.78561e-05	6.65	6.16	6.48	5.37	0.58	0.89
399949_at	399949	LOC399949	C11ORF88	NA	7.58859e-05	0.00423219	0.810251	2.12	2.52	2.05	2.12	0.76	0.95
143678_at	143678	LOC143678	C11ORF94	NA	7.11106e-05	0.000115946	0.522332	1.99	2.35	2.01	2.01	0.79	1.02
80763_at	80763	LOC80763	C12ORF39	NA	0.0228027	0.00867334	0.0504878	4.3	4.1	4.23	3.01	0.47	0.95
55337_at	55337	LOC55337	C19ORF66	NA	0.00256597	0.00141597	0.00751494	5.39	5.32	5.39	5.83	1.42	1
79630_at	79630	LOC79630	C1ORF54	NA	0.0222735	0.00959713	0.0172239	8.89	8.92	8.76	9.38	1.37	0.92
114899_at	114899	LOC114899	C1QTNF3	NA	0.000247522	2.96332e-05	0.0904996	3.86	4.56	3.62	3.22	0.4	0.84
26005_at	26005	LOC26005	C2CD3	NA	0.000104389	0.00327158	1.55638e-05	3.3	3.36	3.24	3.74	1.3	0.96
388125_at	388125	LOC388125	C2CD4B	NA	0.00353527	0.00152731	0.0226829	3.98	3.47	3.77	4.26	1.72	0.86
718_at	718	LOC718	C3	NA	0.000470985	0.000510688	0.000524922	10.78	10.93	10.95	10.04	0.54	1.12
203111_at	203111	LOC203111	C8ORF47	NA	0.00425195	0.00161893	0.0670295	4.07	3.94	4.27	3.08	0.55	1.15
813_at	813	LOC813	CALU	NA	0.00133051	0.000173287	0.0902855	9.85	9.87	9.75	9.49	0.77	0.93
64170_at	64170	LOC64170	CARD9	NA	0.000100342	0.00144122	1.28772e-05	4.24	4.46	4.38	5.22	1.69	1.1
8556_at	8556	LOC8556	CDC14A	NA	0.0324355	0.00910462	0.0871905	4.39	4.18	4.41	4.68	1.41	1.01
8555_at	8555	LOC8555	CDC14B	NA	0.0115825	0.00263056	0.080578	5.1	5.06	5	4.71	0.79	0.93
55602_at	55602	LOC55602	CDKN2AIP	NA	0.00611498	0.00086069	0.0586869	5.22	5.08	5.23	5.53	1.37	1
50937_at	50937	LOC50937	CDON	NA	0.00408163	0.00572858	0.00441294	4.65	4.23	4.45	3.52	0.61	0.87
79019_at	79019	LOC79019	CENPM	NA	0.0168222	0.00289715	0.0939257	3.07	3.29	3.09	2.86	0.74	1.02
1071_at	1071	LOC1071	CETP	NA	0.0103308	0.00150385	0.0466794	3.21	2.81	3.36	3.81	2.01	1.11
10752_at	10752	LOC10752	CHL1	NA	0.000776684	8.86293e-05	0.0650255	2.82	3.29	2.92	2.5	0.58	1.07
91851_at	91851	LOC91851	CHRDL1	NA	0.00100135	0.0001593	0.0174924	4.71	5.5	4.77	4.33	0.44	1.04
55501_at	55501	LOC55501	CHST12	NK Cell	3.67116e-05	0.000722334	4.32937e-06	3.51	3.58	3.47	4.04	1.38	0.97
63924_at	63924	LOC63924	CIDEC	NA	0.00333957	0.00661532	0.791316	2.49	2.89	2.46	2.45	0.74	0.98
146223_at	146223	LOC146223	CMTM4	NA	0.0014744	0.000872911	0.00169588	5.68	5.63	5.54	4.84	0.58	0.91
1400_at	1400	LOC1400	CRMP1	NA	0.00752897	0.00117647	0.0388778	4.57	4.63	4.33	4.05	0.67	0.85
55118_at	55118	LOC55118	CRTAC1	NA	0.0339662	0.00697985	0.14168	3.57	3.88	3.42	3.25	0.65	0.9
55790_at	55790	LOC55790	CSGALNACT1	NA	0.0222371	0.00480644	0.354303	5.01	4.53	4.94	5.34	1.75	0.95
1478_at	1478	LOC1478	CSTF2	NA	0.0150972	0.00412266	0.130534	5.2	5.34	5.21	4.96	0.77	1.01
9420_at	9420	LOC9420	CYP7B1	NA	0.0321003	0.00623751	0.193958	7.3	7.49	7.16	6.6	0.54	0.91
54360_at	54360	LOC54360	CYTL1	NA	0.00482301	0.000862267	0.0152821	3.28	3.12	3.23	3.79	1.58	0.96
27147_at	27147	LOC27147	DENND2A	NA	0.00171889	0.00022489	0.0624342	5.89	5.98	5.77	5.22	0.59	0.92
10301_at	10301	LOC10301	DLEU1	NA	0.0123126	0.00337367	0.213373	3.91	3.58	3.94	3.99	1.33	1.03
1759_at	1759	LOC1759	DNM1	NA	0.000829423	0.000278896	0.00168212	4.86	5.14	4.7	3.89	0.42	0.9
1855_at	1855	LOC1855	DVL1	NA	0.0149401	0.00321125	0.154477	5.76	5.82	5.73	5.44	0.77	0.98
9666_at	9666	LOC9666	DZIP3	NA	0.000768843	0.00110784	0.637569	4.96	4.32	4.97	4.79	1.39	1
1956_at	1956	LOC1956	EGFR	NA	0.000153845	0.00701268	1.55289e-05	7.36	6.8	7.23	5.74	0.48	0.92
2018_at	2018	LOC2018	EMX2	NA	0.0156538	0.00567229	0.0930783	5.15	4.59	4.97	3.88	0.61	0.88
23052_at	23052	LOC23052	ENDOD1	NA	0.0148764	0.00875064	0.0206782	6.15	6.13	6.13	5.62	0.7	0.99
55068_at	55068	LOC55068	ENOX1	NA	0.00200568	0.000617766	0.507945	2.76	3.16	2.8	2.72	0.74	1.03
92689_at	92689	LOC92689	FAM114A1	NA	0.0124582	0.00266082	0.206362	6.38	6.72	6.28	6.08	0.64	0.93
8933_at	8933	LOC8933	FAM127A	NA	0.00101571	0.000168186	0.277649	6.9	7.3	6.88	6.71	0.66	0.99
100131897_at	100131897	LOC100131897	FAM196B	NA	1.05336e-05	0.00254623	1.61849e-06	3.74	3.93	3.72	4.27	1.27	0.99
163933_at	163933	LOC163933	FAM43B	NA	0.0137879	0.00354229	0.456307	2.53	2.75	2.49	2.38	0.77	0.98
79850_at	79850	LOC79850	FAM57A	NA	0.000531757	0.00150864	0.00525645	4.94	5.22	4.71	4.46	0.59	0.85
2195_at	2195	LOC2195	FAT1	NA	0.00013074	0.00921258	1.39101e-05	9.67	9.47	9.47	8.45	0.49	0.87
115290_at	115290	LOC115290	FBXO17	NA	0.00259421	0.00190439	0.00268189	6	5.74	5.9	5	0.6	0.93
11328_at	11328	LOC11328	FKBP9	NA	0.00873568	0.00890129	0.00768174	6.75	6.49	6.64	6.04	0.73	0.93
64838_at	64838	LOC64838	FNDC4	NA	0.0177826	0.00545431	0.862986	2.61	3.23	2.86	2.72	0.7	1.19
11167_at	11167	LOC11167	FSTL1	NA	0.000433449	0.000156149	0.0409131	8.57	8.38	8.53	7.56	0.56	0.97
8321_at	8321	LOC8321	FZD1	NA	0.000604556	0.00176109	0.000576837	7.19	6.83	7.17	6.39	0.73	0.99
50486_at	50486	LOC50486	G0S2	NA	0.00306968	0.00161261	0.931676	5.49	6.31	5.51	5.61	0.62	1.02
2581_at	2581	LOC2581	GALC	NA	0.000407536	6.17362e-05	0.00513589	5.63	5.6	5.7	6.18	1.5	1.05
2662_at	2662	LOC2662	GDF10	NA	0.00081078	0.0074226	0.996462	2.18	2.53	2.09	2.08	0.73	0.94
200504_at	200504	LOC200504	GKN2	NA	0.00206491	0.000310016	0.778545	2.38	2.55	2.35	2.16	0.77	0.98
2720_at	2720	LOC2720	GLB1	NA	0.0224936	0.0085801	0.0579967	7.94	8.01	8	8.43	1.33	1.04
84662_at	84662	LOC84662	GLIS2	NA	0.0213302	0.00919123	0.0371491	5.67	5.5	5.5	5.17	0.79	0.89
57678_at	57678	LOC57678	GPAM	NA	0.00375138	0.00177448	0.00195682	4.9	4.95	5.21	4.31	0.64	1.24
2817_at	2817	LOC2817	GPC1	NA	0.0166764	0.0034137	0.0477794	4.55	4.63	4.48	4.06	0.67	0.95
7107_at	7107	LOC7107	GPR137B	NA	0.0030579	0.000390703	0.209753	6.41	6.25	6.36	6.79	1.46	0.97
3073_at	3073	LOC3073	HEXA	NA	0.000276641	4.4988e-05	0.00316857	8.06	8.01	8.08	8.39	1.3	1.02
3226_at	3226	LOC3226	HOXC10	NA	0.00460033	0.00380988	0.00295349	6.97	6.76	6.98	5.74	0.49	1.01
3221_at	3221	LOC3221	HOXC4	NA	0.00136774	0.000169839	0.166901	4.81	5.06	4.85	4.66	0.76	1.03
3223_at	3223	LOC3223	HOXC6	NA	0.0331794	0.00634172	0.210174	5.12	5.17	5.01	4.61	0.68	0.92
3242_at	3242	LOC3242	HPD	NA	0.0428792	0.00800464	0.384604	2.6	3.17	2.7	2.05	0.46	1.07
9956_at	9956	LOC9956	HS3ST2	NA	0.00514941	0.00371577	0.00370855	3.53	3.7	3.39	4.27	1.49	0.9
11077_at	11077	LOC11077	HSF2BP	NA	0.0212707	0.00990356	0.826029	2.54	3.12	2.49	2.39	0.6	0.96
3488_at	3488	LOC3488	IGFBP5	NA	0.00138451	0.000208648	0.0330943	8.2	8.24	7.99	7.15	0.47	0.87
3606_at	3606	LOC3606	IL18	NA	0.0282148	0.00995352	0.0689379	5.7	5.85	5.85	6.59	1.67	1.11
3653_at	3653	LOC3653	IPW	NA	0.0296271	0.00601218	0.263418	5.25	4.66	5.03	5.44	1.72	0.86
79190_at	79190	LOC79190	IRX6	NA	0.000731018	0.000738422	0.00374627	3.31	3.07	3.47	2.69	0.77	1.12
140862_at	140862	LOC140862	ISM1	NA	0.00858895	0.00161353	0.106339	4.04	4.67	3.92	3.65	0.49	0.92
3766_at	3766	LOC3766	KCNJ10	NA	0.00754656	0.0074737	0.00255073	2.48	2.67	2.8	3.99	2.49	1.24
3904_at	3904	LOC3904	LAIR2	NA	0.00722169	0.00168196	0.139904	3.72	3.5	3.8	3.99	1.41	1.06
10609_at	10609	LOC10609	LEPREL4	NA	0.0269476	0.00450847	0.14577	4.58	4.74	4.51	4.21	0.69	0.96
51601_at	51601	LOC51601	LIPT1	NA	0.0275411	0.00610066	0.0533781	4.97	4.65	4.85	5.14	1.4	0.92
84918_at	84918	LOC84918	LRP11	NA	0.0129205	0.00322694	0.291633	5.25	5.36	5.22	4.92	0.74	0.98
221091_at	221091	LOC221091	LRRN4CL	NA	0.0209981	0.00846778	0.13948	3.22	3.72	3.2	3.17	0.68	0.99
222229_at	222229	LOC222229	LRWD1	NA	0.0171628	0.00331669	0.154358	4.47	4.7	4.5	4.34	0.78	1.02
57134_at	57134	LOC57134	MAN1C1	NA	0.013964	0.00425902	0.043921	2.91	2.68	2.78	3.4	1.65	0.91
4124_at	4124	LOC4124	MAN2A1	Multiple	0.00141922	0.000618086	0.779497	5.26	4.81	5.38	5.52	1.64	1.08
4125_at	4125	LOC4125	MAN2B1	NA	0.000462729	0.00750213	0.000700622	6.22	6.64	6.33	7.04	1.32	1.08
8028_at	8028	LOC8028	MLLT10	NA	0.000618308	6.45424e-05	0.0424402	5.03	4.82	5.07	5.33	1.42	1.03
4314_at	4314	LOC4314	MMP3	NA	6.32963e-06	0.00089978	0.806486	2.19	3.92	2.32	2.43	0.36	1.1
83876_at	83876	LOC83876	MRO	NA	0.000627499	0.00022084	0.22417	4.35	4.13	4.14	4.6	1.38	0.87
4488_at	4488	LOC4488	MSX2	NA	0.00356525	0.00403886	0.914662	3.04	3.52	3.03	2.97	0.68	0.99
4493_at	4493	LOC4493	MT1E	NA	0.0139624	0.00354346	0.602899	5.57	6.01	5.74	5.4	0.66	1.12
22823_at	22823	LOC22823	MTF2	NA	0.00039902	0.00018303	0.00122908	5.73	5.74	5.75	6.13	1.31	1.02
100289455_at	100289455	LOC100289455	NA	NA	0.00150556	0.00195464	0.00114586	3.27	3.13	3.29	3.65	1.44	1.01
751816_at	NA	NA	NA	NA	0.0163262	0.00385453	0.0109817	2.93	2.95	3.13	3.52	1.49	1.15
27163_at	27163	LOC27163	NAAA	NA	0.00871423	0.00195837	0.0294245	5.13	5.1	5.27	5.5	1.32	1.11
51172_at	51172	LOC51172	NAGPA	Dendritic Cell	0.00301016	0.00102082	0.00147285	4.18	4.04	4.11	4.45	1.33	0.96
83988_at	83988	LOC83988	NCALD	NA	0.0274881	0.00698912	0.090023	6.85	6.81	6.73	6.22	0.67	0.92
4686_at	4686	LOC4686	NCBP1	NA	0.0149687	0.00575823	0.300458	6.06	5.81	6.09	6.18	1.29	1.02
10787_at	10787	LOC10787	NCKAP1	NA	0.000990379	0.00952686	0.000270123	8.51	8.26	8.41	7.77	0.71	0.93
23413_at	23413	LOC23413	NCS1	NA	0.00101925	0.00077159	0.00251778	5.16	5.07	5.17	4.65	0.75	1.01
79625_at	79625	LOC79625	NDNF	NA	0.0392252	0.00820993	0.476237	4.85	5.29	4.39	4.67	0.65	0.73
4820_at	4820	LOC4820	NKTR	Multiple	0.00461625	0.00583712	0.0037669	5.46	5.54	5.41	6.03	1.41	0.97
80896_at	80896	LOC80896	NPL	Myeloid	0.00129512	0.00342352	0.000690308	5.66	6.09	5.67	6.94	1.81	1
4883_at	4883	LOC4883	NPR3	NA	0.0048776	0.00212772	0.0421951	5.46	5.24	5.67	4.18	0.48	1.15
375387_at	375387	LOC375387	NRROS	NA	0.000340054	0.00110061	4.50837e-05	4.17	4.25	4.04	4.69	1.36	0.91
220323_at	220323	LOC220323	OAF	NA	0.0198929	0.00643432	0.0259791	6.6	6.61	6.7	6.12	0.72	1.07
5028_at	5028	LOC5028	P2RY1	NA	0.0182117	0.00396014	0.804574	5.48	5.02	5.43	5.59	1.48	0.96
27143_at	27143	LOC27143	PALD1	NA	0.0259814	0.00934815	0.0165254	6.18	6.12	6.05	6.54	1.34	0.92
79668_at	79668	LOC79668	PARP8	Multiple	0.00079974	0.00167106	0.0010339	5.48	5.7	5.58	6.21	1.43	1.07
197135_at	197135	LOC197135	PATL2	Lymphoid	0.000106976	6.9616e-05	5.2694e-05	3.06	2.98	3.01	3.59	1.53	0.97
5179_at	5179	LOC5179	PENK	NA	9.00904e-05	0.00087704	0.565517	2.06	2.69	2.09	2.09	0.66	1.02
9033_at	9033	LOC9033	PKD2L1	NA	0.00044198	0.00449426	7.38701e-05	3.82	4.2	3.89	4.98	1.72	1.05
56937_at	56937	LOC56937	PMEPA1	NA	0.0146028	0.00413819	0.0490483	7.02	6.94	6.74	6.18	0.59	0.82
11168_at	11168	LOC11168	PSIP1	NA	0.0104955	0.00270784	0.553997	5.72	5.34	5.75	5.85	1.42	1.02
5729_at	5729	LOC5729	PTGDR	NK Cell	0.00217182	0.00215021	0.000425807	2.38	2.33	2.38	2.81	1.4	1
5738_at	5738	LOC5738	PTGFRN	NA	0.00777244	0.00239315	0.0127572	6.67	6.69	6.7	5.91	0.58	1.02
5789_at	5789	LOC5789	PTPRD	NA	0.0234345	0.00715393	0.0498587	4.63	4.48	4.66	3.88	0.66	1.02
5816_at	5816	LOC5816	PVALB	NA	0.0166562	0.00455383	0.367592	2.62	3.07	2.63	2.2	0.55	1.01
347148_at	347148	LOC347148	QRFP	NA	0.00199998	0.000684008	0.475281	2.72	3.11	2.73	2.61	0.7	1
10235_at	10235	LOC10235	RASGRP2	Lymphoid	0.00177875	0.00364191	0.00103975	3.05	3.12	2.92	3.68	1.48	0.92
116362_at	116362	LOC116362	RBP7	NA	0.0313081	0.00792283	0.886621	7.37	6.56	7.22	7.42	1.81	0.91
5973_at	5973	LOC5973	RENBP	NA	0.00496509	0.00959013	0.000886528	2.31	2.38	2.38	2.75	1.29	1.05
85021_at	85021	LOC85021	REPS1	NA	0.000723346	0.00021068	0.00358745	4.26	4.11	4.21	4.47	1.28	0.96
5998_at	5998	LOC5998	RGS3	NA	0.0143526	0.00657209	0.0410906	4.53	4.29	4.34	4.69	1.32	0.88
55599_at	55599	LOC55599	RNPC3	NA	0.00474625	0.00397379	0.000969762	5.09	5.03	5.01	5.72	1.61	0.94
83861_at	83861	LOC83861	RSPH3	NA	0.00771303	0.00178806	0.0400908	6.61	6.67	6.69	6.31	0.78	1.06
6281_at	6281	LOC6281	S100A10	NA	0.0177693	0.00289242	0.0739582	8.48	8.68	8.52	8.22	0.73	1.03
221935_at	221935	LOC221935	SDK1	NA	0.0339815	0.00634588	0.389981	2.7	2.86	2.64	2.54	0.8	0.96
57337_at	57337	LOC57337	SENP7	NA	0.00302644	0.00111021	0.00306742	4.54	4.43	4.38	4.86	1.35	0.9
8910_at	8910	LOC8910	SGCE	NA	0.00897073	0.00515436	0.0212394	7.78	7.4	7.83	6.91	0.71	1.03
166929_at	166929	LOC166929	SGMS2	NA	0.00264633	0.00268397	0.0011132	5.19	5.12	4.98	4.48	0.64	0.87
63898_at	63898	LOC63898	SH2D4A	NA	0.00161996	0.00072636	0.0123323	4.16	4.08	4.25	3.75	0.79	1.07
10736_at	10736	LOC10736	SIX2	NA	0.00107355	0.000356009	0.329627	3.23	3.67	2.96	3.02	0.64	0.83
84561_at	84561	LOC84561	SLC12A8	NA	0.00573556	0.00774707	0.271539	4.55	5.71	4.44	4.72	0.5	0.93
64849_at	64849	LOC64849	SLC13A3	NA	0.00899162	0.00125761	0.34487	2.83	3.1	2.82	2.53	0.67	1
116843_at	116843	LOC116843	SLC18B1	NA	0.0307524	0.00768516	0.0378244	5.47	5.39	5.46	5.89	1.41	1
145389_at	145389	LOC145389	SLC38A6	Myeloid	0.0168909	0.00428162	0.021846	5.16	5.05	5.2	5.84	1.73	1.03
11309_at	11309	LOC11309	SLCO2B1	NA	0.0049403	0.00605779	0.00474053	4.53	4.85	4.67	5.2	1.28	1.1
6594_at	6594	LOC6594	SMARCA1	NA	0.0112216	0.00480862	0.0194713	5.92	5.77	5.89	5.24	0.69	0.98
80320_at	80320	LOC80320	SP6	NA	7.83147e-05	0.000142143	0.984916	2.82	3.14	2.75	2.76	0.77	0.95
64648_at	NA	NA	SPANXD || SPANXE	NA	0.000196174	0.00300232	0.640821	2.56	2.94	2.5	2.58	0.78	0.96
6708_at	6708	LOC6708	SPTA1	NA	8.97135e-06	0.00500015	1.16906e-06	2.36	2.55	2.38	3.23	1.6	1.01
26872_at	26872	LOC26872	STEAP1	NA	0.00933904	0.00594329	0.454027	4.42	4.83	4.64	4.12	0.61	1.16
7003_at	7003	LOC7003	TEAD1	NA	3.75834e-05	0.00098282	1.21964e-05	7.6	7.23	7.54	6.73	0.71	0.96
26011_at	26011	LOC26011	TENM4	NA	0.0123959	0.00794837	0.376751	2.65	3.11	2.55	2.48	0.64	0.94
7018_at	7018	LOC7018	TF	NA	0.0297036	0.008082	0.166031	4.8	5.44	5.08	4.08	0.39	1.21
7022_at	7022	LOC7022	TFAP2C	NA	0.000710242	7.6191e-05	0.257632	2.74	2.86	2.62	2.49	0.77	0.92
29087_at	29087	LOC29087	THYN1	NA	0.00134274	0.000410789	0.136057	6.44	6.02	6.51	6.6	1.49	1.05
83877_at	83877	LOC83877	TM2D2	Myeloid	0.0406642	0.00896047	0.69184	6.36	6.11	6.3	6.43	1.25	0.96
55314_at	55314	LOC55314	TMEM144	NA	0.0354883	0.00689503	0.319051	5.43	5.38	5.49	5.76	1.31	1.04
55248_at	55248	LOC55248	TMEM206	Myeloid	0.00610901	0.00173913	0.0418731	6.13	6.09	6.09	6.53	1.36	0.98
219623_at	219623	LOC219623	TMEM26	NA	0.000107176	1.22703e-05	0.0366312	4.72	4.49	4.98	5.04	1.46	1.2
144110_at	144110	LOC144110	TMEM86A	NA	0.00235553	0.00925695	0.000526517	3.91	4.12	4.01	4.51	1.31	1.07
944_at	944	LOC944	TNFSF8	Multiple	0.000759777	0.0022992	0.000583173	3.68	4.05	3.78	4.65	1.51	1.07
7103_at	7103	LOC7103	TSPAN8	NA	0.00237251	0.000544998	0.0163588	5.56	5.74	5.7	5	0.6	1.1
199223_at	199223	LOC199223	TTC21A	NA	0.00508542	0.00206812	0.577492	3.17	3.45	3.15	3.06	0.76	0.99
10426_at	10426	LOC10426	TUBGCP3	NA	0.000691484	8.44242e-05	0.0166524	5.07	4.97	5.11	5.38	1.32	1.03
84203_at	84203	LOC84203	TXNDC2	NA	4.16199e-06	0.00774835	0.1778	3.54	4.2	3.47	3.66	0.69	0.95
6675_at	6675	LOC6675	UAP1	NA	0.0323172	0.00718507	0.395499	5.16	5.38	5.21	4.97	0.75	1.04
402682_at	402682	LOC402682	UFSP1	NA	0.0187192	0.00661845	0.673275	3.5	3.9	3.35	3.23	0.63	0.9
7358_at	7358	LOC7358	UGDH	NA	0.00578348	0.00271493	0.0102631	7.69	7.68	7.61	7.07	0.66	0.94
7366_at	7366	LOC7366	UGT2B15	NA	0.013108	0.00499039	0.915166	2.5	2.96	2.53	2.45	0.71	1.02
7412_at	7412	LOC7412	VCAM1	NA	0.00555262	0.000998069	0.694755	8.56	8.34	8.68	8.67	1.26	1.09
26276_at	26276	LOC26276	VPS33B	NA	0.00106249	0.000299747	0.0568101	5.33	5.04	5.35	5.59	1.47	1.01
10413_at	10413	LOC10413	YAP1	NA	0.00140412	0.00533997	0.000471948	6.55	6.26	6.52	5.7	0.68	0.98
65986_at	65986	LOC65986	ZBTB10	NA	0.000118328	0.00221085	6.24154e-05	6.11	5.72	6.03	5.22	0.71	0.95
79776_at	79776	LOC79776	ZFHX4	NA	0.00175794	0.000307943	0.0415584	3.47	4.06	3.47	3.05	0.5	1
9372_at	9372	LOC9372	ZFYVE9	NA	0.0026185	0.00592767	0.00211562	5.63	5.39	5.54	5.01	0.77	0.94
80317_at	80317	LOC80317	ZKSCAN3	NA	0.0243914	0.00622989	0.482405	4.01	3.72	3.95	4.07	1.27	0.96
126295_at	126295	LOC126295	ZNF57	NA	0.0129514	0.00325449	0.232897	3.92	3.54	3.74	4	1.38	0.88
79970_at	79970	LOC79970	ZNF767	NA	0.0014426	0.00479637	0.000764983	3.5	3.58	3.37	3.97	1.31	0.91
79724_at	79724	LOC79724	ZNF768	NA	0.00473651	0.00305652	0.0153882	7.66	7.65	7.65	7.23	0.75	0.99
58492_at	58492	LOC58492	ZNF77	NA	0.0145378	0.00434755	0.0255637	2.76	2.61	2.7	3.09	1.4	0.96
345462_at	345462	LOC345462	ZNF879	NA	0.0114243	0.00203201	0.128374	2.98	2.66	2.85	3.09	1.35	0.92
90204_at	90204	LOC90204	ZSWIM1	NA	0.0031267	0.00552557	0.579366	2.54	2.87	2.52	2.45	0.75	0.99
125150_at	125150	LOC125150	ZSWIM7	NA	0.0180241	0.00996173	0.0536464	5.82	5.63	5.7	5.99	1.28	0.92
221302_at	221302	LOC221302	ZUFSP	NA	0.0140246	0.00312971	0.0278515	4.66	4.45	4.6	4.98	1.45	0.96

## Sheet: S7 Screen_CD3TCR_1336sig
Probeset	logFC	AveExpr	t	P.Value	adj.P.Val	B	ENTREZ	LocusLink	Symbol	IRIS_Most_Specific
122622_at	-0.973447	5.7987	-4.65453	2.018e-05	0.000724879	2.32876	122622	LOC122622	ADSSL1	NA
1160_at	-0.939872	4.46788	-3.41988	0.00117178	0.0223542	-1.53942	1160	LOC1160	CKMT2	NA
29923_at	-0.853658	6.53509	-4.35836	5.61828e-05	0.00175948	1.34444	29923	LOC29923	HILPDA	NA
8490_at	-0.787502	8.48959	-3.51894	0.000865226	0.0174464	-1.25479	8490	LOC8490	RGS5	NA
3202_at	-0.696737	5.20723	-5.84125	2.70665e-07	1.65346e-05	6.51087	3202	LOC3202	HOXA5	NA
4133_at	-0.696225	5.26295	-4.41645	4.60571e-05	0.00150289	1.53511	4133	LOC4133	MAP2	NA
89944_at	-0.663695	4.70604	-5.03658	5.19826e-06	0.000222506	3.63893	89944	LOC89944	GLB1L2	NA
10085_at	-0.66004	6.35259	-3.22583	0.00209376	0.0350149	-2.08134	10085	LOC10085	EDIL3	NA
845_at	-0.640942	3.20695	-3.24921	0.00195424	0.0333909	-2.01717	845	LOC845	CASQ2	NA
2903_at	-0.640053	3.23648	-3.61977	0.00063252	0.0138357	-0.95985	2903	LOC2903	GRIN2A	NA
4828_at	-0.631015	5.63446	-3.53784	0.000816177	0.016693	-1.19992	4828	LOC4828	NMB	NA
768_at	-0.617008	5.33913	-3.37552	0.00134022	0.025005	-1.66516	768	LOC768	CA9	NA
65012_at	-0.599313	3.60979	-3.6136	0.00064484	0.0140062	-0.978038	65012	LOC65012	SLC26A10	NA
4281_at	-0.587359	5.05368	-4.16503	0.000107983	0.00319833	0.718964	4281	LOC4281	MID1	NA
51751_at	-0.56452	6.33641	-3.08069	0.00319217	0.046457	-2.47245	51751	LOC51751	HIGD1B	NA
8470_at	-0.539229	5.01616	-3.21868	0.00213822	0.0355177	-2.10088	8470	LOC8470	SORBS2	NA
140597_at	-0.53538	2.73643	-3.17405	0.0024367	0.0388091	-2.22229	140597	LOC140597	TCEAL2	NA
5507_at	-0.533044	7.87448	-3.58839	0.000697637	0.0147225	-1.0522	5507	LOC5507	PPP1R3C	NA
482_at	-0.528572	4.87541	-3.49337	0.000936107	0.0186729	-1.32878	482	LOC482	ATP1B2	NA
79971_at	-0.525783	6.35614	-3.87987	0.000276222	0.00699826	-0.175799	79971	LOC79971	WLS	NA
23255_at	-0.517972	3.65811	-3.55254	0.00077985	0.0161456	-1.15709	23255	LOC23255	SOGA2	NA
10370_at	-0.514141	6.68486	-4.47068	3.82219e-05	0.00127208	1.7142	10370	LOC10370	CITED2	NA
643911_at	-0.513618	7.53913	-3.19735	0.00227634	0.036824	-2.15907	643911	LOC643911	CRNDE	NA
79660_at	-0.510682	6.60041	-4.47703	3.7395e-05	0.00124679	1.73521	79660	LOC79660	PPP1R3B	NA
2770_at	-0.500953	5.97686	-5.68994	4.75605e-07	2.70106e-05	5.96161	2770	LOC2770	GNAI1	NA
9172_at	-0.498472	4.9237	-4.09528	0.00013625	0.00388678	0.496942	9172	LOC9172	MYOM2	NA
154796_at	-0.496355	4.34829	-4.52817	3.13356e-05	0.00106581	1.90515	154796	LOC154796	AMOT	NA
221303_at	-0.481073	3.57429	-3.94139	0.000226146	0.00593166	0.0142715	221303	LOC221303	FAM162B	NA
10052_at	-0.479563	7.0038	-3.24435	0.00198248	0.0337148	-2.03052	10052	LOC10052	GJC1	NA
1906_at	-0.477424	5.97054	-3.08681	0.00313653	0.0458289	-2.45619	1906	LOC1906	EDN1	NA
2847_at	-0.47672	3.759	-3.1514	0.00260279	0.0404827	-2.28346	2847	LOC2847	MCHR1	NA
55607_at	-0.474626	4.90339	-3.52177	0.000857705	0.0173324	-1.24659	55607	LOC55607	PPP1R9A	NA
84302_at	-0.467701	4.66141	-3.24403	0.00198439	0.0337165	-2.03142	84302	LOC84302	TMEM246	NA
121227_at	-0.465893	6.16534	-3.09341	0.00307768	0.0452714	-2.43868	121227	LOC121227	LRIG3	NA
23551_at	-0.462822	3.69671	-3.59506	0.000683282	0.0145943	-1.03261	23551	LOC23551	RASD2	NA
7436_at	-0.46166	5.12227	-3.1985	0.00226864	0.0367876	-2.15592	7436	LOC7436	VLDLR	NA
590_at	-0.458875	2.36821	-3.38347	0.00130843	0.0245195	-1.6427	590	LOC590	BCHE	NA
5563_at	-0.456923	4.44952	-4.03693	0.000165285	0.00455417	0.312726	5563	LOC5563	PRKAA2	NA
54463_at	-0.456712	7.72284	-3.30724	0.00164494	0.0294866	-1.85657	54463	LOC54463	FAM134B	NA
23037_at	-0.456562	4.765	-3.52885	0.000839178	0.0170694	-1.22606	23037	LOC23037	PDZD2	NA
9639_at	-0.456244	6.27518	-4.72183	1.59345e-05	0.000581373	2.55646	9639	LOC9639	ARHGEF10	NA
4038_at	-0.451813	4.91516	-3.51639	0.000872082	0.0175275	-1.26221	4038	LOC4038	LRP4	NA
220965_at	-0.451415	4.38882	-3.812	0.000343814	0.00843458	-0.383473	220965	LOC220965	FAM13C	NA
56122_at	-0.450364	4.88336	-3.46258	0.00102877	0.0201532	-1.41739	56122	LOC56122	PCDHB14	NA
157695_at	-0.447206	5.37873	-4.33211	6.14408e-05	0.00190815	1.25866	157695	LOC157695	TDRP	NA
11030_at	-0.444463	6.88439	-4.40532	4.78489e-05	0.00154004	1.49848	11030	LOC11030	RBPMS	NA
23336_at	-0.443091	6.9272	-3.05925	0.00339412	0.0485611	-2.52913	23336	LOC23336	SYNM	NA
56126_at	-0.442575	3.62959	-3.24917	0.00195444	0.0333909	-2.01726	56126	LOC56126	PCDHB10	NA
3672_at	-0.438724	5.85979	-3.0586	0.00340044	0.0485766	-2.53085	3672	LOC3672	ITGA1	NA
3234_at	-0.433642	7.41162	-3.96134	0.000211875	0.00562105	0.0762729	3234	LOC3234	HOXD8	NA
55893_at	-0.432804	7.28855	-3.25242	0.00193578	0.0332865	-2.00833	55893	LOC55893	ZNF395	NA
56477_at	-0.431259	4.12679	-3.45072	0.00106673	0.0207438	-1.45138	56477	LOC56477	CCL28	NA
387763_at	-0.43115	6.83959	-3.16002	0.00253838	0.0399494	-2.26022	387763	LOC387763	C11ORF96	NA
4430_at	-0.430556	6.46339	-3.25906	0.00189813	0.0327909	-1.99004	4430	LOC4430	MYO1B	NA
135228_at	-0.426587	6.7315	-3.16191	0.00252446	0.0397639	-2.25512	135228	LOC135228	CD109	NA
64283_at	-0.424406	4.84796	-3.22457	0.00210149	0.035096	-2.08477	64283	LOC64283	ARHGEF28	NA
5137_at	-0.414388	3.2915	-3.34774	0.0014571	0.0265964	-1.74334	5137	LOC5137	PDE1C	NA
2444_at	-0.413826	4.91548	-3.67139	0.000537842	0.0121957	-0.806845	2444	LOC2444	FRK	NA
3306_at	-0.411354	4.94036	-3.62067	0.000630739	0.0138214	-0.957192	3306	LOC3306	HSPA2	NA
55816_at	-0.408138	4.84305	-3.19818	0.0022708	0.0367876	-2.1568	55816	LOC55816	DOK5	NA
283_at	-0.406331	6.44986	-3.09505	0.00306318	0.0451927	-2.43431	283	LOC283	ANG	NA
23321_at	-0.400461	6.16184	-3.42317	0.00116013	0.022234	-1.53006	23321	LOC23321	TRIM2	NA
51776_at	-0.400101	6.44421	-4.43515	4.31939e-05	0.00141723	1.59673	51776	LOC51776	PK	NA
79085_at	-0.397849	5.78355	-3.25093	0.00194432	0.0333407	-2.01243	79085	LOC79085	SLC25A23	NA
114088_at	-0.396228	3.71854	-3.59317	0.000687325	0.014638	-1.03817	114088	LOC114088	TRIM9	NA
3913_at	-0.396124	7.76982	-3.13496	0.00272991	0.0417616	-2.32766	3913	LOC3913	LAMB2	NA
57221_at	-0.395213	2.70191	-4.07463	0.000145909	0.00411804	0.431603	57221	LOC57221	KIAA1244	NA
6840_at	-0.394319	6.91214	-3.51803	0.000867676	0.0174763	-1.25745	6840	LOC6840	SVIL	NA
54874_at	-0.393786	7.0692	-3.58898	0.000696345	0.0147225	-1.05045	54874	LOC54874	FNBP1L	NA
3679_at	-0.392793	4.24975	-4.12307	0.000124221	0.00359331	0.58516	3679	LOC3679	ITGA7	NA
111_at	-0.392438	3.48143	-3.10664	0.00296269	0.044191	-2.40345	111	LOC111	ADCY5	NA
6038_at	-0.3923	6.63087	-3.43275	0.00112679	0.0216845	-1.50273	6038	LOC6038	RNASE4	NA
56124_at	-0.391078	3.47421	-4.03873	0.000164304	0.00454062	0.318397	56124	LOC56124	PCDHB12	NA
2036_at	-0.390992	6.71061	-3.27897	0.00178935	0.031349	-1.93505	2036	LOC2036	EPB41L1	NA
117247_at	-0.390547	3.81691	-3.6917	0.000504446	0.011525	-0.746292	117247	LOC117247	SLC16A10	NA
7088_at	-0.388999	5.36052	-3.58648	0.000701798	0.0147768	-1.0578	7088	LOC7088	TLE1	NA
5348_at	-0.386876	3.66464	-3.2597	0.00189455	0.0327851	-1.98828	5348	LOC5348	FXYD1	NA
55890_at	-0.381267	6.52575	-3.04407	0.00354433	0.0496064	-2.56911	55890	LOC55890	GPRC5C	NA
10579_at	-0.379137	4.41413	-3.50787	0.000895255	0.0179157	-1.28686	10579	LOC10579	TACC2	NA
27152_at	-0.371469	3.90891	-5.4552	1.13291e-06	5.89334e-05	5.11709	27152	LOC27152	INTU	NA
285382_at	-0.369539	4.11095	-3.04628	0.00352206	0.0495517	-2.56329	285382	LOC285382	C3ORF70	NA
3201_at	-0.369261	5.67171	-3.35284	0.00143492	0.026332	-1.72901	3201	LOC3201	HOXA4	NA
5793_at	-0.367892	6.39998	-3.04731	0.00351176	0.0494993	-2.56059	5793	LOC5793	PTPRG	NA
285671_at	-0.36573	3.33014	-3.24493	0.0019791	0.0336882	-2.02893	285671	LOC285671	RNF180	NA
4040_at	-0.3649	6.21952	-4.58671	2.55715e-05	0.000887641	2.10073	4040	LOC4040	LRP6	NA
11041_at	-0.363905	5.53204	-5.05963	4.78458e-06	0.000206159	3.71922	11041	LOC11041	B3GNT1	NA
3653_at	-0.359124	4.92543	-3.15319	0.00258931	0.0404052	-2.27865	3653	LOC3653	IPW	NA
22998_at	-0.357366	5.97371	-3.12721	0.00279189	0.0423071	-2.34846	22998	LOC22998	LIMCH1	NA
8622_at	-0.357131	3.93259	-3.88395	0.000272595	0.00692524	-0.163245	8622	LOC8622	PDE8B	NA
9223_at	-0.355616	3.89729	-3.71431	0.000469595	0.010863	-0.678628	9223	LOC9223	MAGI1	NA
91151_at	-0.355463	5.52457	-3.34463	0.00147078	0.0267521	-1.75207	91151	LOC91151	TIGD7	NA
145483_at	-0.353356	3.79257	-3.41519	0.00118856	0.022587	-1.55275	145483	LOC145483	FAM161B	NA
8853_at	-0.349448	6.70448	-3.30181	0.00167179	0.0298325	-1.87168	8853	LOC8853	ASAP2	NA
166647_at	-0.346912	3.7278	-3.6087	0.000654804	0.0141767	-0.992492	166647	LOC166647	GPR125	NA
10966_at	-0.346877	7.37338	-3.51093	0.000886858	0.0177668	-1.278	10966	LOC10966	RAB40B	NA
10979_at	-0.345205	7.13005	-3.79676	0.000361042	0.00877606	-0.429811	10979	LOC10979	FERMT2	NA
7220_at	-0.344152	6.02239	-3.28023	0.00178266	0.0312909	-1.93156	7220	LOC7220	TRPC1	NA
29763_at	-0.340035	3.4777	-3.65029	0.000574777	0.0128141	-0.869545	29763	LOC29763	PACSIN3	NA
23500_at	-0.339465	4.55339	-3.21123	0.00218555	0.0358825	-2.12124	23500	LOC23500	DAAM2	NA
6567_at	-0.338618	3.57248	-3.95894	0.000213544	0.00565725	0.0688068	6567	LOC6567	SLC16A2	NA
6915_at	-0.338598	4.6823	-3.09498	0.00306379	0.0451927	-2.43449	6915	LOC6915	TBXA2R	NA
4041_at	-0.338519	4.83695	-4.03745	0.000164999	0.00455304	0.314377	4041	LOC4041	LRP5	NA
23371_at	-0.337673	6.17534	-3.24227	0.00199472	0.0338301	-2.03625	23371	LOC23371	TENC1	NA
9069_at	-0.334321	6.38984	-3.84002	0.000314174	0.00787386	-0.297984	9069	LOC9069	CLDN12	NA
79633_at	-0.333944	3.92557	-3.11753	0.00287108	0.0432082	-2.37437	79633	LOC79633	FAT4	NA
9411_at	-0.331442	6.04273	-3.22621	0.00209141	0.0350149	-2.0803	9411	LOC9411	ARHGAP29	NA
2009_at	-0.33091	4.95289	-3.44738	0.00107765	0.0209341	-1.46093	2009	LOC2009	EML1	NA
10082_at	-0.329701	4.48175	-3.23899	0.00201413	0.0340349	-2.04527	10082	LOC10082	GPC6	NA
1122_at	-0.329338	4.12934	-3.62187	0.000628362	0.0137935	-0.953631	1122	LOC1122	CHML	NA
11341_at	-0.327994	2.94232	-3.44103	0.00109874	0.0212771	-1.4791	11341	LOC11341	SCRG1	NA
85461_at	-0.327465	4.99405	-3.32433	0.00156302	0.0282088	-1.80889	85461	LOC85461	TANC1	NA
27330_at	-0.324541	2.85764	-3.86896	0.000286152	0.00721048	-0.209328	27330	LOC27330	RPS6KA6	NA
26470_at	-0.322518	3.99087	-3.3086	0.00163824	0.0293949	-1.85276	26470	LOC26470	SEZ6L2	NA
80055_at	-0.321007	4.34405	-5.49048	9.94901e-07	5.26391e-05	5.24339	80055	LOC80055	PGAP1	NA
1073_at	-0.32083	6.74689	-3.9015	0.000257511	0.00661442	-0.109176	1073	LOC1073	CFL2	NA
27145_at	-0.317041	4.19459	-3.11182	0.00291873	0.0437479	-2.38961	27145	LOC27145	FILIP1	NA
56898_at	-0.31539	7.31986	-3.59996	0.000672919	0.0144471	-1.01821	56898	LOC56898	BDH2	NA
6094_at	-0.31415	5.3397	-3.82559	0.00032912	0.00813861	-0.342062	6094	LOC6094	ROM1	NA
5648_at	-0.313978	3.43748	-3.19936	0.00226298	0.0367721	-2.1536	5648	LOC5648	MASP1	NA
2257_at	-0.310146	2.93814	-3.33275	0.00152414	0.0276144	-1.78536	2257	LOC2257	FGF12	NA
2317_at	-0.310127	7.45868	-3.18599	0.00235322	0.0377389	-2.18992	2317	LOC2317	FLNB	NA
10194_at	-0.309108	5.191	-3.52524	0.000848588	0.0172231	-1.23654	10194	LOC10194	TSHZ1	NA
619208_at	-0.309036	5.03939	-3.28318	0.00176707	0.031076	-1.92337	619208	LOC619208	FAM229B	NA
6939_at	-0.306236	4.86077	-3.36837	0.0013694	0.0254057	-1.68531	6939	LOC6939	TCF15	NA
5066_at	-0.306196	7.33698	-4.09437	0.000136663	0.0038926	0.494049	5066	LOC5066	PAM	NA
3232_at	-0.306016	3.24343	-3.4795	0.000976815	0.0193298	-1.36875	3232	LOC3232	HOXD3	NA
442213_at	-0.305852	3.18189	-3.10062	0.00301447	0.0447138	-2.41948	442213	LOC442213	PTCHD4	NA
23331_at	-0.305745	5.54484	-3.04681	0.00351679	0.049515	-2.56191	23331	LOC23331	TTC28	NA
8496_at	-0.305217	6.1633	-3.61113	0.000649843	0.0140984	-0.985324	8496	LOC8496	PPFIBP1	NA
79366_at	-0.304977	3.80718	-3.88993	0.000267362	0.00684852	-0.144838	79366	LOC79366	HMGN5	NA
55450_at	-0.301959	6.39264	-3.42194	0.00116444	0.0222707	-1.53354	55450	LOC55450	CAMK2N1	NA
55218_at	-0.301592	3.90445	-5.25321	2.37318e-06	0.000113297	4.39893	55218	LOC55218	EXD2	NA
8936_at	-0.300149	3.84343	-5.13738	3.61366e-06	0.000159784	3.99115	8936	LOC8936	WASF1	NA
23252_at	-0.296894	3.43236	-4.06348	0.000151399	0.00425105	0.396379	23252	LOC23252	OTUD3	NA
10413_at	-0.296035	6.34102	-3.64087	0.000592036	0.0131073	-0.897463	10413	LOC10413	YAP1	NA
23301_at	-0.294883	7.47523	-3.80304	0.000353854	0.00862391	-0.410753	23301	LOC23301	EHBP1	NA
7005_at	-0.294092	3.54075	-3.43291	0.00112626	0.0216845	-1.50229	7005	LOC7005	TEAD3	NA
167691_at	-0.292819	3.7453	-3.86974	0.00028543	0.00720207	-0.206931	167691	LOC167691	LCA5	NA
84529_at	-0.291357	4.70423	-3.78027	0.000380627	0.00915625	-0.479855	84529	LOC84529	C15ORF41	NA
23363_at	-0.291335	4.09064	-3.75733	0.000409553	0.0097261	-0.549208	23363	LOC23363	OBSL1	NA
22824_at	-0.291147	4.06079	-3.29184	0.00172216	0.0304883	-1.89937	22824	LOC22824	HSPA4L	NA
3632_at	-0.290481	4.7417	-3.81222	0.000343572	0.00843458	-0.382805	3632	LOC3632	INPP5A	NA
10867_at	-0.289428	4.56832	-4.12616	0.000122948	0.00356761	0.594993	10867	LOC10867	TSPAN9	NA
259217_at	-0.287266	4.86639	-3.30139	0.00167387	0.0298325	-1.87284	259217	LOC259217	HSPA12A	NA
26018_at	-0.286464	4.86425	-3.15892	0.00254655	0.040044	-2.2632	26018	LOC26018	LRIG1	NA
3213_at	-0.283656	4.26312	-3.47974	0.000976094	0.0193298	-1.36806	3213	LOC3213	HOXB3	NA
3218_at	-0.282886	2.98639	-3.07536	0.00324127	0.0469313	-2.48656	3218	LOC3218	HOXB8	NA
5255_at	-0.281298	3.35591	-3.51513	0.000875469	0.0175766	-1.26586	5255	LOC5255	PHKA1	NA
8912_at	-0.281281	2.8893	-4.61592	2.30961e-05	0.000812346	2.19875	8912	LOC8912	CACNA1H	NA
3280_at	-0.281146	5.90007	-3.13872	0.00270034	0.0414366	-2.31757	3280	LOC3280	HES1	NA
140465_at	-0.279352	9.24002	-4.12879	0.000121874	0.00354753	0.60337	140465	LOC140465	MYL6B	NA
57664_at	-0.279286	4.54411	-3.81547	0.00034001	0.00836334	-0.372924	57664	LOC57664	PLEKHA4	NA
60312_at	-0.279251	4.07996	-3.15342	0.0025876	0.0404052	-2.27803	60312	LOC60312	AFAP1	NA
3915_at	-0.279119	8.76604	-3.38296	0.00131045	0.0245326	-1.64415	3915	LOC3915	LAMC1	NA
54839_at	-0.275479	4.321	-3.08482	0.00315451	0.0460485	-2.46148	54839	LOC54839	LRRC49	NA
4646_at	-0.274493	6.20334	-3.25026	0.0019482	0.0333694	-2.01429	4646	LOC4646	MYO6	NA
9828_at	-0.273783	4.91454	-3.2394	0.00201168	0.0340245	-2.04413	9828	LOC9828	ARHGEF17	NA
7026_at	-0.273695	7.96989	-3.46913	0.00100835	0.019837	-1.39858	7026	LOC7026	NR2F2	NA
28981_at	-0.27348	4.58961	-3.98242	0.000197741	0.00531457	0.141971	28981	LOC28981	IFT81	NA
85458_at	-0.273177	5.29393	-3.1141	0.00289966	0.0435324	-2.38354	85458	LOC85458	DIXDC1	NA
6594_at	-0.272731	5.82413	-3.18801	0.00233938	0.0375819	-2.18444	6594	LOC6594	SMARCA1	NA
6666_at	-0.269001	4.23516	-4.02722	0.000170662	0.00468147	0.282223	6666	LOC6666	SOX12	NA
23052_at	-0.266015	6.30827	-3.59078	0.000692467	0.0146898	-1.04519	23052	LOC23052	ENDOD1	NA
10076_at	-0.265843	3.74702	-3.21097	0.00218722	0.0358825	-2.12195	10076	LOC10076	PTPRU	NA
78986_at	-0.265782	3.27802	-3.37089	0.00135904	0.0252388	-1.67821	78986	LOC78986	DUSP26	NA
145282_at	-0.26556	3.76191	-4.8188	1.13135e-05	0.000433203	2.88697	145282	LOC145282	MIPOL1	NA
84916_at	-0.265536	7.3048	-3.77002	0.000393299	0.00940564	-0.51087	84916	LOC84916	CIRH1A	NA
9372_at	-0.264518	5.55939	-4.40879	4.72829e-05	0.00152711	1.5099	9372	LOC9372	ZFYVE9	NA
3351_at	-0.263665	2.39577	-3.17141	0.00245555	0.038976	-2.22944	3351	LOC3351	HTR1B	NA
284_at	-0.263593	4.11495	-3.15108	0.00260518	0.0404861	-2.28431	284	LOC284	ANGPT1	NA
54558_at	-0.263135	4.92229	-3.35717	0.00141637	0.0260688	-1.71684	54558	LOC54558	SPATA6	NA
135293_at	-0.256229	4.40902	-3.13392	0.00273817	0.0417835	-2.33046	135293	LOC135293	PM20D2	NA
7771_at	-0.255256	3.52273	-3.83325	0.000321106	0.00799365	-0.318684	7771	LOC7771	ZNF112	NA
154214_at	-0.25364	5.08273	-3.14901	0.00262091	0.0406285	-2.28989	154214	LOC154214	RNF217	NA
658_at	-0.253524	2.79143	-3.0846	0.00315652	0.0460485	-2.46207	658	LOC658	BMPR1B	NA
64785_at	-0.252211	3.88109	-3.24842	0.00195881	0.0334349	-2.01934	64785	LOC64785	GINS3	NA
399664_at	-0.251681	6.06846	-3.05387	0.00344666	0.0489809	-2.54332	399664	LOC399664	MEX3D	NA
56123_at	-0.250468	2.69191	-3.21524	0.00215993	0.0357444	-2.11028	56123	LOC56123	PCDHB13	NA
9920_at	-0.249708	5.04105	-3.88626	0.000270559	0.00690186	-0.156127	9920	LOC9920	KBTBD11	NA
54660_at	-0.249618	3.61639	-3.87077	0.000284481	0.00718788	-0.203769	54660	LOC54660	PCDHB18	NA
60401_at	-0.249478	3.59521	-3.43793	0.00110916	0.0214118	-1.48795	60401	LOC60401	EDA2R	NA
54985_at	-0.248313	8.45914	-3.30598	0.00165113	0.0295406	-1.86008	54985	LOC54985	HCFC1R1	NA
10787_at	-0.247734	8.39432	-4.69207	1.7692e-05	0.00064297	2.45558	10787	LOC10787	NCKAP1	NA
153642_at	-0.247132	4.59352	-3.56089	0.000759932	0.0158558	-1.13274	153642	LOC153642	ARSK	NA
286343_at	-0.246522	3.70657	-3.09752	0.00304148	0.0449708	-2.42773	286343	LOC286343	LURAP1L	NA
3316_at	-0.245555	4.80813	-3.15047	0.00260985	0.0405247	-2.28597	3316	LOC3316	HSPB2	NA
60485_at	-0.244995	7.04634	-3.24648	0.00197004	0.0335956	-2.02467	60485	LOC60485	SAV1	NA
11155_at	-0.244153	2.75979	-3.14784	0.00262988	0.0406657	-2.29306	11155	LOC11155	LDB3	NA
57496_at	-0.243733	5.09186	-3.41894	0.00117513	0.0223829	-1.5421	57496	LOC57496	MKL2	NA
23268_at	-0.242598	4.12827	-3.47364	0.000994513	0.019648	-1.3856	23268	LOC23268	DNMBP	NA
57613_at	-0.241431	3.74559	-3.6975	0.000495274	0.0113552	-0.728953	57613	LOC57613	KIAA1467	NA
594_at	-0.241381	3.95793	-4.13274	0.000120281	0.00351215	0.615939	594	LOC594	BCKDHB	NA
57597_at	-0.239242	6.44277	-3.48476	0.000961175	0.0190705	-1.3536	57597	LOC57597	BAHCC1	NA
5151_at	-0.239149	5.99671	-3.54692	0.000793547	0.0163562	-1.17347	5151	LOC5151	PDE8A	NA
23093_at	-0.239116	7.20046	-3.5587	0.000765091	0.015911	-1.13911	23093	LOC23093	TTLL5	NA
55975_at	-0.237429	6.32768	-3.97594	0.000201986	0.00541282	0.121754	55975	LOC55975	KLHL7	NA
79711_at	-0.237152	4.91123	-3.17415	0.00243604	0.0388091	-2.22203	79711	LOC79711	IPO4	NA
627_at	-0.237092	2.53557	-3.19097	0.00231926	0.0373232	-2.17642	627	LOC627	BDNF	NA
7761_at	-0.237011	3.16266	-3.05142	0.00347083	0.0492037	-2.54977	7761	LOC7761	ZNF214	NA
64398_at	-0.236291	6.51011	-3.83368	0.000320659	0.00799322	-0.317361	64398	LOC64398	MPP5	NA
116987_at	-0.235103	5.36693	-3.66922	0.000541537	0.0122496	-0.81331	116987	LOC116987	AGAP1	NA
11043_at	-0.234769	4.54536	-3.15631	0.00256592	0.0402463	-2.27023	11043	LOC11043	MID2	NA
56957_at	-0.234087	4.85323	-4.3585	5.61553e-05	0.00175948	1.34491	56957	LOC56957	OTUD7B	NA
394_at	-0.234034	5.43134	-3.22567	0.00209475	0.0350149	-2.08178	394	LOC394	ARHGAP5	NA
10419_at	-0.233065	6.15129	-3.20249	0.00224228	0.036624	-2.14506	10419	LOC10419	PRMT5	NA
49855_at	-0.23258	4.71986	-3.17257	0.00244726	0.0388778	-2.2263	49855	LOC49855	SCAPER	NA
23051_at	-0.230297	5.24529	-3.16842	0.00247707	0.0392172	-2.23754	23051	LOC23051	ZHX3	NA
284370_at	-0.229482	3.66643	-3.29915	0.00168509	0.0299462	-1.87907	284370	LOC284370	ZNF615	NA
112752_at	-0.228505	5.94598	-3.21241	0.00217798	0.0358492	-2.11801	112752	LOC112752	IFT43	NA
10217_at	-0.227823	5.85468	-3.2147	0.00216341	0.0357444	-2.11177	10217	LOC10217	CTDSPL	NA
23270_at	-0.227745	4.7392	-3.12727	0.00279135	0.0423071	-2.34828	23270	LOC23270	TSPYL4	NA
4337_at	-0.227211	3.39096	-3.19606	0.00228495	0.0369311	-2.16257	4337	LOC4337	MOCS1	NA
159195_at	-0.226307	4.26759	-3.18556	0.00235619	0.037754	-2.19109	159195	LOC159195	USP54	NA
160418_at	-0.225633	7.72905	-3.14381	0.0026608	0.0410351	-2.3039	160418	LOC160418	TMTC3	NA
4139_at	-0.224991	3.14421	-3.61527	0.000641476	0.0139822	-0.973107	4139	LOC4139	MARK1	NA
143458_at	-0.224977	4.13221	-3.70164	0.000488824	0.0112212	-0.716563	143458	LOC143458	LDLRAD3	NA
55084_at	-0.224897	2.73393	-3.50149	0.000913006	0.0182317	-1.30531	55084	LOC55084	SOBP	NA
5364_at	-0.223071	3.80025	-3.61779	0.000636455	0.0138891	-0.965698	5364	LOC5364	PLXNB1	NA
25974_at	-0.221516	3.64432	-3.34862	0.00145326	0.0265636	-1.74088	25974	LOC25974	MMACHC	NA
5516_at	-0.220446	8.1132	-3.45132	0.00106476	0.0207271	-1.44964	5516	LOC5516	PPP2CB	NA
57570_at	-0.220308	5.80107	-3.27182	0.00182772	0.031871	-1.95483	57570	LOC57570	TRMT5	NA
8777_at	-0.220148	4.74157	-3.16424	0.00250741	0.0395626	-2.24883	8777	LOC8777	MPDZ	NA
51293_at	-0.219947	3.40782	-3.04495	0.00353547	0.0495858	-2.5668	51293	LOC51293	CD320	NA
84312_at	-0.219527	4.77777	-3.66374	0.00055096	0.0124103	-0.829598	84312	LOC84312	BRMS1L	NA
219902_at	-0.218984	4.0087	-3.82851	0.000326046	0.00807334	-0.333164	219902	LOC219902	TMEM136	NA
1454_at	-0.21671	4.7552	-4.45009	4.10317e-05	0.00134951	1.64605	1454	LOC1454	CSNK1E	NA
79175_at	-0.214607	3.9337	-4.32102	6.38025e-05	0.00196171	1.22251	79175	LOC79175	ZNF343	NA
252983_at	-0.214034	5.2113	-3.13188	0.00275437	0.0419534	-2.33593	252983	LOC252983	STXBP4	NA
261734_at	-0.213454	4.09177	-3.25141	0.00194158	0.0333284	-2.01112	261734	LOC261734	NPHP4	NA
85363_at	-0.212496	4.64448	-3.12243	0.00283072	0.042774	-2.36126	85363	LOC85363	TRIM5	NA
7067_at	-0.212484	4.9915	-3.15573	0.00257023	0.04028	-2.27179	7067	LOC7067	THRA	NA
9581_at	-0.211515	7.14555	-3.44565	0.00108334	0.0210227	-1.46587	9581	LOC9581	PREPL	NA
57531_at	-0.210793	4.90891	-4.0028	0.000184944	0.00502869	0.205667	57531	LOC57531	HACE1	NA
1793_at	-0.209275	6.36221	-3.2994	0.00168384	0.0299462	-1.87838	1793	LOC1793	DOCK1	NA
266812_at	-0.208878	3.18487	-3.60363	0.000665253	0.0143323	-1.00741	266812	LOC266812	NAP1L5	NA
4301_at	-0.208658	5.4423	-3.37872	0.00132734	0.0248238	-1.65613	4301	LOC4301	MLLT4	NA
119710_at	-0.207224	7.93075	-3.19432	0.00229657	0.0370867	-2.16729	119710	LOC119710	C11ORF74	NA
26974_at	-0.206185	2.76762	-3.05293	0.00345595	0.0490302	-2.5458	26974	LOC26974	ZNF285	NA
55333_at	-0.205851	6.46207	-3.57923	0.000717826	0.015063	-1.07907	55333	LOC55333	SYNJ2BP	NA
10152_at	-0.204336	6.69652	-3.19102	0.00231889	0.0373232	-2.17627	10152	LOC10152	ABI2	NA
7993_at	-0.204197	3.70029	-3.22591	0.00209327	0.0350149	-2.08112	7993	LOC7993	UBXN8	NA
7637_at	-0.203776	5.16916	-4.1484	0.000114156	0.00335442	0.66585	7637	LOC7637	ZNF84	NA
7126_at	-0.202829	5.92252	-3.18028	0.00239286	0.0382755	-2.20543	7126	LOC7126	TNFAIP1	NA
79047_at	-0.202463	3.85379	-3.36696	0.00137525	0.0254751	-1.6893	79047	LOC79047	KCTD15	NA
22921_at	-0.200899	5.03779	-3.37276	0.00135142	0.0251224	-1.67295	22921	LOC22921	MSRB2	NA
51285_at	-0.20088	3.29366	-4.09162	0.000137914	0.00392221	0.485358	51285	LOC51285	RASL12	NA
10500_at	-0.200657	3.39604	-3.6299	0.00061277	0.0134991	-0.929934	10500	LOC10500	SEMA6C	NA
9472_at	-0.200542	2.37379	-3.11684	0.00287676	0.0432586	-2.3762	9472	LOC9472	AKAP6	NA
162681_at	-0.19948	3.15246	-3.10158	0.00300617	0.0446263	-2.41693	162681	LOC162681	C18ORF54	NA
29090_at	-0.198588	7.59191	-3.05635	0.00342237	0.0487773	-2.53679	29090	LOC29090	TIMM21	NA
23116_at	-0.198278	4.01882	-3.7055	0.000482894	0.0111102	-0.705029	23116	LOC23116	FAM179B	NA
29119_at	-0.197955	2.86413	-3.60787	0.000656506	0.0141767	-0.994939	29119	LOC29119	CTNNA3	NA
53918_at	-0.197568	7.0732	-3.13433	0.00273494	0.0417686	-2.32937	53918	LOC53918	PELO	NA
100127889_at	-0.195642	2.65032	-3.04903	0.00349457	0.0494232	-2.55606	100127889	LOC100127889	C10ORF131	NA
162239_at	-0.195007	3.53154	-4.02752	0.000170495	0.00468147	0.283155	162239	LOC162239	ZFP1	NA
501_at	-0.194058	4.60916	-3.13495	0.00272999	0.0417616	-2.32769	501	LOC501	ALDH7A1	NA
10128_at	-0.193568	6.57852	-3.11776	0.00286916	0.0432082	-2.37375	10128	LOC10128	LRPPRC	NA
93_at	-0.19326	4.87955	-3.10637	0.00296494	0.044191	-2.40415	93	LOC93	ACVR2B	NA
23059_at	-0.193047	5.40907	-3.09322	0.00307938	0.0452714	-2.43919	23059	LOC23059	CLUAP1	NA
84181_at	-0.191215	4.54461	-3.38742	0.00129291	0.0243268	-1.63154	84181	LOC84181	CHD6	NA
23353_at	-0.191135	5.74493	-3.25671	0.00191136	0.0329888	-1.99651	23353	LOC23353	SUN1	NA
151_at	-0.190299	2.78825	-3.30638	0.00164916	0.0295339	-1.85897	151	LOC151	ADRA2B	NA
373_at	-0.189949	5.76513	-3.09314	0.00308001	0.0452714	-2.43938	373	LOC373	TRIM23	NA
84552_at	-0.189399	3.8263	-3.04887	0.00349623	0.0494232	-2.5565	84552	LOC84552	PARD6G	NA
84445_at	-0.188882	4.58714	-4.13565	0.00011912	0.00348373	0.625201	84445	LOC84445	LZTS2	NA
7976_at	-0.188765	2.68696	-4.60654	2.38636e-05	0.000833028	2.16728	7976	LOC7976	FZD3	NA
27018_at	-0.186377	10.5484	-3.09551	0.00305915	0.0451927	-2.43309	27018	LOC27018	NGFRAP1	NA
10815_at	-0.184575	2.63777	-3.04151	0.00357032	0.049853	-2.57585	10815	LOC10815	CPLX1	NA
51616_at	-0.183313	7.37648	-3.36157	0.00139776	0.0257906	-1.70447	51616	LOC51616	TAF9B	NA
388536_at	-0.183252	3.18493	-3.2263	0.00209084	0.0350149	-2.08005	388536	LOC388536	ZNF790	NA
80014_at	-0.181453	5.45154	-3.06085	0.00337867	0.0484145	-2.52492	80014	LOC80014	WWC2	NA
8892_at	-0.179266	6.94675	-3.80817	0.000348075	0.00849423	-0.395148	8892	LOC8892	EIF2B2	NA
158586_at	-0.17713	6.08623	-3.40863	0.00121246	0.0229527	-1.57139	158586	LOC158586	ZXDB	NA
6297_at	-0.175843	3.13932	-4.92536	7.74389e-06	0.000308609	3.25328	6297	LOC6297	SALL2	NA
26160_at	-0.17574	4.87989	-3.06852	0.00330536	0.0475474	-2.50465	26160	LOC26160	IFT172	NA
23142_at	-0.174937	5.88336	-3.07219	0.00327082	0.0471602	-2.49495	23142	LOC23142	DCUN1D4	NA
291_at	-0.172452	2.94591	-3.43749	0.00111065	0.0214184	-1.48921	291	LOC291	SLC25A4	NA
83989_at	-0.168234	5.42563	-3.1087	0.0029451	0.0439899	-2.39793	83989	LOC83989	FAM172A	NA
5955_at	-0.167742	7.23318	-3.65997	0.000557537	0.0125258	-0.840801	5955	LOC5955	RCN2	NA
5286_at	-0.164837	7.16348	-3.7188	0.000462951	0.0108067	-0.665155	5286	LOC5286	PIK3C2A	NA
988_at	-0.164634	7.41718	-3.15149	0.00260211	0.0404827	-2.28322	988	LOC988	CDC5L	Multiple
29109_at	-0.162486	3.57829	-3.30278	0.00166697	0.0297952	-1.86898	29109	LOC29109	FHOD1	NA
197407_at	-0.162357	5.37223	-3.50189	0.000911889	0.0182289	-1.30416	197407	LOC197407	ZNF48	NA
92270_at	-0.16065	2.63182	-3.65052	0.000574364	0.0128141	-0.868867	92270	LOC92270	ATP6AP1L	NA
55906_at	-0.160632	3.35343	-3.07379	0.00325588	0.047091	-2.49072	55906	LOC55906	ZC4H2	NA
92345_at	-0.160125	5.05743	-3.18695	0.00234664	0.0376659	-2.18732	92345	LOC92345	NAF1	NA
202052_at	-0.159543	2.89734	-3.09366	0.00307547	0.0452714	-2.43801	202052	LOC202052	DNAJC18	NA
23235_at	-0.159078	3.80846	-3.08685	0.00313618	0.0458289	-2.45609	23235	LOC23235	SIK2	NA
92312_at	-0.158129	2.60396	-3.73071	0.000445771	0.0104658	-0.62939	92312	LOC92312	MEX3A	NA
2135_at	-0.157882	4.75954	-3.07988	0.00319953	0.046457	-2.47458	2135	LOC2135	EXTL2	NA
9767_at	-0.157451	5.09573	-3.22753	0.00208331	0.0350149	-2.07669	9767	LOC9767	JADE3	NA
6529_at	-0.154141	2.55391	-3.33048	0.00153452	0.0277214	-1.79171	6529	LOC6529	SLC6A1	NA
10428_at	-0.153792	9.17793	-3.2074	0.00221025	0.0361963	-2.13169	10428	LOC10428	CFDP1	NA
7716_at	-0.152221	6.78536	-3.04518	0.00353319	0.0495858	-2.56621	7716	LOC7716	VEZF1	NA
169270_at	-0.151922	2.82993	-3.30925	0.00163507	0.0293665	-1.85096	169270	LOC169270	ZNF596	NA
343702_at	-0.151862	2.87761	-3.09272	0.00308375	0.0452714	-2.4405	343702	LOC343702	XKR7	NA
163033_at	-0.149675	5.25879	-3.28576	0.0017536	0.0308977	-1.91624	163033	LOC163033	ZNF579	NA
55188_at	-0.149163	5.07671	-3.08684	0.00313633	0.0458289	-2.45614	55188	LOC55188	RIC8B	NA
285672_at	-0.148866	5.58989	-3.47186	0.000999958	0.0197251	-1.39073	285672	LOC285672	SREK1IP1	NA
151354_at	-0.145834	3.2647	-3.05994	0.00338743	0.0485027	-2.52731	151354	LOC151354	FAM84A	NA
80031_at	-0.145361	3.30821	-3.04808	0.00350412	0.0494491	-2.55858	80031	LOC80031	SEMA6D	NA
84247_at	-0.144908	4.57982	-3.20007	0.00225825	0.0367721	-2.15165	84247	LOC84247	LDOC1L	NA
54756_at	-0.142313	2.66755	-3.25002	0.00194959	0.0333694	-2.01495	54756	LOC54756	IL17RD	NA
55212_at	-0.141348	3.10648	-4.74974	1.44425e-05	0.000530063	2.65129	55212	LOC55212	BBS7	NA
55898_at	-0.140695	6.12375	-3.35493	0.00142597	0.0261936	-1.72316	55898	LOC55898	UNC45A	NA
55028_at	-0.140544	4.65041	-3.15002	0.00261327	0.0405439	-2.28719	55028	LOC55028	C17ORF80	NA
4664_at	-0.138654	6.09154	-3.06552	0.00333384	0.047846	-2.51258	4664	LOC4664	NAB1	NA
9863_at	-0.137914	2.7043	-3.33175	0.00152868	0.0276698	-1.78815	9863	LOC9863	MAGI2	NA
51222_at	-0.131682	3.21227	-3.05375	0.00344791	0.0489809	-2.54365	51222	LOC51222	ZNF219	NA
5132_at	-0.128891	2.47986	-3.47167	0.00100054	0.0197251	-1.39128	5132	LOC5132	PDC	NA
5745_at	-0.117875	4.26966	-3.21887	0.00213705	0.0355177	-2.10038	5745	LOC5745	PTH1R	NA
27443_at	-0.117428	2.35568	-3.11899	0.00285897	0.0430957	-2.37045	27443	LOC27443	CECR2	NA
59351_at	-0.113438	2.8287	-3.14846	0.00262512	0.0406306	-2.29138	59351	LOC59351	PBOV1	NA
340554_at	-0.111656	2.42362	-3.19798	0.00227211	0.0367876	-2.15734	340554	LOC340554	ZC3H12B	NA
90025_at	-0.110057	2.63732	-3.05653	0.00342059	0.0487773	-2.53631	90025	LOC90025	UBE3D	NA
158866_at	-0.109458	2.40789	-3.55743	0.000768124	0.0159562	-1.14283	158866	LOC158866	ZDHHC15	NA
57212_at	-0.108104	4.06212	-3.04009	0.00358477	0.049942	-2.57958	57212	LOC57212	TP73-AS1	NA
3882_at	-0.107746	2.80132	-3.22827	0.00207877	0.0350149	-2.07466	3882	LOC3882	KRT32	NA
6560_at	-0.105149	3.78452	-3.41991	0.00117166	0.0223542	-1.53933	6560	LOC6560	SLC12A4	NA
8618_at	-0.10128	2.02955	-3.13795	0.00270638	0.0414688	-2.31964	8618	LOC8618	CADPS	NA
5872_at	-0.097959	11.7479	-3.04034	0.00358216	0.049942	-2.57891	5872	LOC5872	RAB13	NA
54894_at	-0.0977971	2.85357	-3.35193	0.00143885	0.026352	-1.73156	54894	LOC54894	RNF43	NA
54531_at	-0.0952314	3.28689	-3.43054	0.0011344	0.0218084	-1.50904	54531	LOC54531	MIER2	NA
339967_at	-0.087306	2.36109	-3.2534	0.00193019	0.0332519	-2.00564	339967	LOC339967	TMPRSS11A	NA
7432_at	-0.0571861	2.11875	-3.15343	0.00258748	0.0404052	-2.27799	7432	LOC7432	VIP	NA
134187_at	0.0683104	2.35895	3.09993	0.00302049	0.044745	-2.42133	134187	LOC134187	POU5F2	NA
389206_at	0.0718533	2.36738	3.15417	0.00258194	0.0403952	-2.276	389206	LOC389206	BEND4	NA
640_at	0.0745436	2.12927	3.09982	0.00302139	0.044745	-2.4216	640	LOC640	BLK	B Cell
4602_at	0.0826754	2.25386	4.00969	0.000180801	0.00494501	0.227243	4602	LOC4602	MYB	NA
387804_at	0.0840557	2.40934	3.0456	0.00352898	0.0495858	-2.5651	387804	LOC387804	VSTM5	NA
80025_at	0.08535	4.87886	3.2786	0.00179128	0.0313533	-1.93606	80025	LOC80025	PANK2	NA
84969_at	0.0939291	3.32691	3.09001	0.00310786	0.0455533	-2.4477	84969	LOC84969	TOX2	NA
201176_at	0.0954598	3.13477	3.04839	0.003501	0.0494426	-2.55776	201176	LOC201176	ARHGAP27	NA
11035_at	0.0996698	2.60854	3.32206	0.00157368	0.0283461	-1.81523	11035	LOC11035	RIPK3	NA
998_at	0.102706	4.03721	3.09147	0.00309485	0.0453984	-2.44382	998	LOC998	CDC42	Multiple
124460_at	0.105123	2.77902	4.23564	8.51827e-05	0.0025639	0.945751	124460	LOC124460	SNX20	Multiple
220002_at	0.10586	3.22621	3.32233	0.00157241	0.0283461	-1.81448	220002	LOC220002	CYB561A3	NA
150365_at	0.107845	2.30527	3.4868	0.000955187	0.0190126	-1.34773	150365	LOC150365	MEI1	NA
333929_at	0.109915	3.40611	3.05545	0.00343121	0.0488283	-2.53917	333929	LOC333929	SNAI3	NA
7534_at	0.112197	10.1143	3.04064	0.00357918	0.0499391	-2.57814	7534	LOC7534	YWHAZ	NA
79705_at	0.112651	3.03963	3.27344	0.00181893	0.0317774	-1.95033	79705	LOC79705	LRRK1	NA
2175_at	0.115888	3.12143	4.2372	8.47362e-05	0.0025546	0.95078	2175	LOC2175	FANCA	NA
5452_at	0.119811	3.09675	3.63822	0.000596972	0.0131981	-0.905297	5452	LOC5452	POU2F2	NA
116442_at	0.121131	2.26827	3.66646	0.000546266	0.0123415	-0.82152	116442	LOC116442	RAB39B	NA
79109_at	0.121896	4.70768	3.37531	0.00134107	0.025005	-1.66575	79109	LOC79109	MAPKAP1	Multiple
92799_at	0.122007	4.19466	3.04512	0.00353374	0.0495858	-2.56635	92799	LOC92799	SHKBP1	Multiple
22908_at	0.122967	4.88723	3.76085	0.000404985	0.00964227	-0.53859	22908	LOC22908	SACM1L	NA
51552_at	0.123506	6.83909	3.17676	0.00241751	0.0385701	-2.21495	51552	LOC51552	RAB14	NA
2041_at	0.124419	2.5913	3.60845	0.000655309	0.0141767	-0.993219	2041	LOC2041	EPHA1	NA
5216_at	0.124975	10.2364	3.15293	0.00259128	0.0404052	-2.27935	5216	LOC5216	PFN1	NA
8115_at	0.124978	2.80043	3.6067	0.000658905	0.014212	-0.998377	8115	LOC8115	TCL1A	B Cell
54442_at	0.125107	3.41198	3.45159	0.00106389	0.0207271	-1.44888	54442	LOC54442	KCTD5	NA
10943_at	0.130974	4.01262	3.8003	0.000356974	0.00868855	-0.419073	10943	LOC10943	MSL3	NA
128611_at	0.131431	2.99323	4.52016	3.22175e-05	0.00109181	1.87847	128611	LOC128611	ZNF831	NA
158067_at	0.132217	2.42912	3.14501	0.00265152	0.0409321	-2.30066	158067	LOC158067	AK8	Myeloid
23547_at	0.13236	2.88137	3.07118	0.00328036	0.0472611	-2.49764	23547	LOC23547	LILRA4	NA
79585_at	0.132852	4.09938	3.38545	0.00130061	0.0243976	-1.63709	79585	LOC79585	CORO7	NA
643_at	0.134113	2.47466	3.49182	0.000940565	0.0187417	-1.33324	643	LOC643	CXCR5	B Cell
10746_at	0.134183	7.2795	3.09291	0.00308209	0.0452714	-2.44	10746	LOC10746	MAP3K2	NA
140947_at	0.134744	2.64227	5.20135	2.86567e-06	0.000132384	4.216	140947	LOC140947	C5ORF20	Dendritic Cell
53347_at	0.13706	2.85425	4.81361	1.15237e-05	0.000440344	2.86919	53347	LOC53347	UBASH3A	NA
83605_at	0.13779	4.08916	3.16562	0.00249736	0.039471	-2.24511	83605	LOC83605	CCM2	NA
221472_at	0.138668	2.30182	4.36731	5.44935e-05	0.00171525	1.37372	221472	LOC221472	FGD2	NA
158830_at	0.138891	2.45268	3.42676	0.0011475	0.0220148	-1.51981	158830	LOC158830	CXORF65	NA
10507_at	0.139475	3.45041	3.35095	0.00144311	0.0264039	-1.73432	10507	LOC10507	SEMA4D	Multiple
23046_at	0.139867	2.64907	5.41259	1.32495e-06	6.75977e-05	4.96491	23046	LOC23046	KIF21B	NA
79368_at	0.140525	2.72373	3.33427	0.00151721	0.0275157	-1.78111	79368	LOC79368	FCRL2	B Cell
79155_at	0.142235	5.81741	3.88702	0.000269892	0.0068943	-0.153782	79155	LOC79155	TNIP2	NA
3301_at	0.142347	10.4714	3.41494	0.00118949	0.022587	-1.55348	3301	LOC3301	DNAJA1	NA
81614_at	0.142352	7.19618	3.34632	0.00146333	0.0266688	-1.74733	81614	LOC81614	NIPA2	NA
113730_at	0.142709	3.64496	3.26073	0.00188878	0.0327512	-1.98544	113730	LOC113730	KLHDC7B	NA
57175_at	0.14309	4.15609	3.29081	0.00172747	0.0305242	-1.90224	57175	LOC57175	CORO1B	NA
161145_at	0.143671	3.1777	4.4106	4.69914e-05	0.00152264	1.51584	161145	LOC161145	TMEM229B	NA
11068_at	0.144652	5.27018	3.41752	0.00118019	0.0224563	-1.54613	11068	LOC11068	CYB561D2	NA
55809_at	0.146846	3.58448	3.46601	0.00101803	0.0200063	-1.40754	55809	LOC55809	TRERF1	Multiple
113277_at	0.148378	4.54809	3.1156	0.00288711	0.0433791	-2.37952	113277	LOC113277	TMEM106A	NA
103_at	0.149624	7.1897	3.25264	0.00193455	0.0332865	-2.00774	103	LOC103	ADAR	NA
11021_at	0.150428	5.30652	3.14842	0.00262542	0.0406306	-2.29149	11021	LOC11021	RAB35	NA
257101_at	0.150443	3.44921	3.25137	0.00194181	0.0333284	-2.01123	257101	LOC257101	ZNF683	NA
8764_at	0.150627	4.93009	3.08686	0.00313609	0.0458289	-2.45606	8764	LOC8764	TNFRSF14	NA
60559_at	0.151915	9.33591	3.12428	0.00281564	0.0426155	-2.35631	60559	LOC60559	SPCS3	Multiple
81569_at	0.152182	2.83518	3.56055	0.000760732	0.0158558	-1.13373	81569	LOC81569	ACTL8	NA
55770_at	0.152403	5.51513	3.2306	0.00206453	0.0348232	-2.06826	55770	LOC55770	EXOC2	NA
55743_at	0.153111	3.61704	3.21711	0.00214813	0.0355869	-2.10519	55743	LOC55743	CHFR	NA
81688_at	0.153253	9.08527	3.59057	0.000692921	0.0146898	-1.04581	81688	LOC81688	C6ORF62	Multiple
923_at	0.153386	2.60986	6.11881	9.55505e-08	6.52378e-06	7.52679	923	LOC923	CD6	T Cell
55122_at	0.154612	5.83218	3.63154	0.000609617	0.0134456	-0.925069	55122	LOC55122	AKIRIN2	NA
89853_at	0.15485	3.94104	4.11622	0.000127088	0.00366482	0.563379	89853	LOC89853	MVB12B	NA
56674_at	0.154885	8.09771	3.28988	0.00173223	0.0305668	-1.90481	56674	LOC56674	TMEM9B	NA
5885_at	0.155103	7.89618	3.51106	0.000886503	0.0177668	-1.27763	5885	LOC5885	RAD21	NA
9125_at	0.156529	5.87793	3.30161	0.00167275	0.0298325	-1.87221	9125	LOC9125	RQCD1	NA
10672_at	0.156595	7.97243	3.06676	0.00332211	0.0477515	-2.50932	10672	LOC10672	GNA13	NA
84824_at	0.157059	2.8332	3.52244	0.000855942	0.0173156	-1.24465	84824	LOC84824	FCRLA	B Cell
84678_at	0.158001	5.04748	3.72656	0.000451685	0.0105912	-0.641857	84678	LOC84678	KDM2B	NA
5330_at	0.15922	2.88605	3.19199	0.00231232	0.0372761	-2.17363	5330	LOC5330	PLCB2	NA
23526_at	0.159552	3.3438	4.05595	0.00015522	0.00432172	0.372614	23526	LOC23526	HMHA1	NA
340152_at	0.159734	2.96629	5.0365	5.1999e-06	0.000222506	3.63862	340152	LOC340152	ZC3H12D	NA
51719_at	0.159921	8.04079	3.24133	0.00200024	0.0338618	-2.03882	51719	LOC51719	CAB39	Multiple
4170_at	0.160169	6.23605	4.20109	9.56857e-05	0.00285229	0.834534	4170	LOC4170	MCL1	Myeloid
90427_at	0.160603	4.27389	3.20007	0.00225825	0.0367721	-2.15165	90427	LOC90427	BMF	NA
26469_at	0.160847	6.48445	3.27939	0.00178708	0.0313389	-1.93387	26469	LOC26469	PTPN18	NA
4049_at	0.161377	3.6438	3.8638	0.000290968	0.00732192	-0.225173	4049	LOC4049	LTA	Lymphoid
28688_at	0.161745	2.55752	3.76208	0.000403398	0.00961682	-0.534874	28688	LOC28688	TRAV5	T Cell
6734_at	0.162531	7.55102	3.05355	0.00344984	0.0489809	-2.54417	6734	LOC6734	SRPR	NA
56659_at	0.162661	2.30664	3.98312	0.000197288	0.00531457	0.144152	56659	LOC56659	KCNK13	NA
57192_at	0.164569	6.05384	3.04404	0.00354465	0.0496064	-2.56919	57192	LOC57192	MCOLN1	Lymphoid
28952_at	0.165045	4.4118	3.03934	0.00359243	0.0499682	-2.58155	28952	LOC28952	CCDC22	NA
100128751_at	0.165822	2.15761	4.75395	1.42296e-05	0.000524322	2.66561	NA	NA	NA	NA
2323_at	0.166478	4.05571	3.54498	0.000798347	0.0164369	-1.17914	2323	LOC2323	FLT3LG	NA
3984_at	0.166561	5.29705	3.09788	0.00303837	0.0449606	-2.42678	3984	LOC3984	LIMK1	NA
7011_at	0.16684	4.03759	3.9279	0.000236318	0.00615521	-0.0275599	7011	LOC7011	TEP1	NA
23338_at	0.166938	4.21845	3.98476	0.000196231	0.00529789	0.149268	23338	LOC23338	JADE2	NA
10487_at	0.167207	8.28073	3.18891	0.00233325	0.0375159	-2.18201	10487	LOC10487	CAP1	Multiple
5534_at	0.167687	7.35004	4.04042	0.000163391	0.00452887	0.323707	5534	LOC5534	PPP3R1	NA
5720_at	0.167699	10.328	3.44396	0.00108896	0.0211096	-1.47072	5720	LOC5720	PSME1	NA
9683_at	0.168121	5.45448	3.55052	0.000784768	0.0162113	-1.163	9683	LOC9683	N4BP1	NA
164668_at	0.168177	3.56614	5.03982	5.13808e-06	0.000220878	3.6502	164668	LOC164668	APOBEC3H	NA
10462_at	0.168923	2.28259	3.51906	0.000864905	0.0174464	-1.25445	10462	LOC10462	CLEC10A	Dendritic Cell
1844_at	0.169203	2.92079	5.23058	2.57692e-06	0.00012146	4.31901	1844	LOC1844	DUSP2	T Cell
83416_at	0.169906	2.19218	3.45929	0.00103917	0.0202927	-1.42682	83416	LOC83416	FCRL5	B Cell
348378_at	0.170121	3.05804	3.69164	0.000504539	0.011525	-0.746467	348378	LOC348378	FAM159A	NA
64419_at	0.170164	4.99609	4.02089	0.000174259	0.0047731	0.262349	64419	LOC64419	MTMR14	NA
8031_at	0.170462	9.27418	3.08314	0.00316982	0.04617	-2.46596	8031	LOC8031	NCOA4	NA
401124_at	0.170786	3.04536	4.78037	1.29621e-05	0.000485321	2.75564	401124	LOC401124	DTHD1	NA
115992_at	0.171024	3.42382	3.96335	0.00021049	0.0056003	0.082513	115992	LOC115992	RNF166	Multiple
115350_at	0.171956	2.0713	3.80846	0.000347746	0.00849423	-0.39425	115350	LOC115350	FCRL1	B Cell
154141_at	0.172146	3.08209	3.59091	0.000692187	0.0146898	-1.04481	154141	LOC154141	MBOAT1	NA
10018_at	0.172538	4.55237	3.35229	0.00143733	0.0263502	-1.73058	10018	LOC10018	BCL2L11	Multiple
2787_at	0.173469	8.42266	3.08391	0.00316283	0.0461043	-2.46391	2787	LOC2787	GNG5	NA
6375_at	0.173665	2.19609	4.56158	2.79062e-05	0.000961496	2.01665	6375	LOC6375	XCL1	Lymphoid
51582_at	0.174126	6.25655	3.04719	0.00351301	0.0494993	-2.56092	51582	LOC51582	AZIN1	NA
4149_at	0.176149	8.68116	4.65113	2.04218e-05	0.000730737	2.31729	4149	LOC4149	MAX	NA
257144_at	0.176523	2.51479	3.9847	0.000196271	0.00529789	0.149074	257144	LOC257144	GCSAM	NA
64098_at	0.177775	5.03932	3.19915	0.00226433	0.0367721	-2.15415	64098	LOC64098	PARVG	Multiple
221656_at	0.177888	6.5433	3.52808	0.000841169	0.0170912	-1.22828	221656	LOC221656	KDM1B	NA
23515_at	0.178318	5.45895	3.88507	0.000271605	0.00690955	-0.15979	23515	LOC23515	MORC3	NA
7127_at	0.178609	3.86741	3.58202	0.000711624	0.0149497	-1.0709	7127	LOC7127	TNFAIP2	Myeloid
84433_at	0.178693	3.52	3.37292	0.00135076	0.0251224	-1.67249	84433	LOC84433	CARD11	Lymphoid
6314_at	0.178731	5.29982	3.83006	0.000324418	0.00805449	-0.328415	6314	LOC6314	ATXN7	NA
441108_at	0.18041	3.60845	3.26028	0.00189131	0.0327645	-1.98669	441108	LOC441108	C5ORF56	NA
11234_at	0.181414	6.07205	3.29677	0.00169709	0.0300826	-1.88569	11234	LOC11234	HPS5	NA
91319_at	0.181904	3.41107	3.04472	0.00353784	0.0495858	-2.56742	91319	LOC91319	DERL3	B Cell
9555_at	0.182184	8.9782	3.22318	0.00211014	0.0351456	-2.08859	9555	LOC9555	H2AFY	Multiple
7112_at	0.182624	5.78798	3.22672	0.00208825	0.0350149	-2.07889	7112	LOC7112	TMPO	Lymphoid
55707_at	0.184112	6.60798	3.92299	0.000240129	0.00623699	-0.0427681	55707	LOC55707	NECAP2	Multiple
11226_at	0.185353	3.97063	3.07245	0.00326839	0.0471602	-2.49426	11226	LOC11226	GALNT6	NA
51759_at	0.186165	6.95452	3.14357	0.00266261	0.0410351	-2.30453	51759	LOC51759	C9ORF78	NA
8514_at	0.186191	3.47855	3.73881	0.000434445	0.0102257	-0.605045	8514	LOC8514	KCNAB2	NA
4141_at	0.1869	6.56277	3.29813	0.00169019	0.0300081	-1.88189	4141	LOC4141	MARS	NA
197135_at	0.187059	3.04075	3.29666	0.00169763	0.0300826	-1.88598	197135	LOC197135	PATL2	Lymphoid
567_at	0.187236	11.9288	7.12732	2.07305e-09	2.40137e-07	11.2752	567	LOC567	B2M	NA
10390_at	0.18789	7.47789	3.6507	0.000574033	0.0128141	-0.868322	10390	LOC10390	CEPT1	NA
4929_at	0.188222	3.182	3.1385	0.00270205	0.0414366	-2.31816	4929	LOC4929	NR4A2	NA
55167_at	0.188813	5.42725	3.40416	0.00122901	0.0232186	-1.58409	55167	LOC55167	MSL2	NA
6671_at	0.189	4.53877	3.13996	0.00269064	0.0413618	-2.31423	6671	LOC6671	SP4	Lymphoid
343413_at	0.189467	3.23614	4.37755	5.262e-05	0.00166475	1.40727	343413	LOC343413	FCRL6	NA
3459_at	0.18983	8.80063	3.29968	0.00168243	0.0299462	-1.8776	3459	LOC3459	IFNGR1	Myeloid
2769_at	0.190064	3.5048	3.04297	0.00355547	0.0496829	-2.57201	2769	LOC2769	GNA15	Monocyte
8439_at	0.190338	5.00025	3.2897	0.00173318	0.0305668	-1.90531	8439	LOC8439	NSMAF	Myeloid
4242_at	0.190354	4.17093	3.94334	0.000224714	0.00590265	0.0203124	4242	LOC4242	MFNG	Multiple
3594_at	0.191554	3.07554	6.27962	5.2085e-08	3.7784e-06	8.11953	3594	LOC3594	IL12RB1	NA
11157_at	0.191677	7.04616	3.15653	0.00256427	0.0402463	-2.26963	11157	LOC11157	LSM6	NA
7764_at	0.191822	6.76798	3.21192	0.00218112	0.0358492	-2.11936	7764	LOC7764	ZNF217	Multiple
51347_at	0.192239	6.91959	3.21259	0.00217684	0.0358492	-2.11753	51347	LOC51347	TAOK3	NA
255231_at	0.19235	3.16646	4.79898	1.21363e-05	0.00046185	2.81919	255231	LOC255231	MCOLN2	Multiple
8073_at	0.192402	7.64175	3.83107	0.000323365	0.00803911	-0.325333	8073	LOC8073	PTP4A2	Multiple
3455_at	0.192625	7.86988	3.48481	0.000961042	0.0190705	-1.35347	3455	LOC3455	IFNAR2	Multiple
841_at	0.192811	5.78109	3.40565	0.00122348	0.0231378	-1.57987	841	LOC841	CASP8	Multiple
5140_at	0.193362	3.9283	3.11129	0.00292323	0.0437793	-2.39103	5140	LOC5140	PDE3B	NA
93349_at	0.195037	6.42586	3.16211	0.00252297	0.0397639	-2.25457	93349	LOC93349	SP140L	NA
5660_at	0.195592	11.2124	5.33948	1.7321e-06	8.55503e-05	4.7046	5660	LOC5660	PSAP	NA
51738_at	0.19707	3.58459	3.98635	0.000195212	0.00528467	0.154223	51738	LOC51738	GHRL	NA
23646_at	0.197216	4.49977	3.06349	0.00335328	0.0480879	-2.51795	23646	LOC23646	PLD3	NA
9958_at	0.198156	6.42184	3.29122	0.00172536	0.0305158	-1.9011	9958	LOC9958	USP15	Myeloid
5027_at	0.198463	3.40146	4.85833	9.83263e-06	0.000382012	3.02248	5027	LOC5027	P2RX7	Myeloid
84440_at	0.198548	4.00032	3.24366	0.00198653	0.033722	-2.03242	84440	LOC84440	RAB11FIP4	NA
1612_at	0.198647	4.69941	3.36298	0.00139182	0.0257446	-1.7005	1612	LOC1612	DAPK1	NA
4792_at	0.198893	7.73586	3.26745	0.00185156	0.0321959	-1.9669	4792	LOC4792	NFKBIA	NA
10006_at	0.198988	7.61884	6.08062	1.1032e-07	7.36959e-06	7.38646	10006	LOC10006	ABI1	Multiple
5686_at	0.19907	8.6207	3.38627	0.00129739	0.0243618	-1.63477	5686	LOC5686	PSMA5	NA
843_at	0.19938	4.66287	3.12925	0.00277539	0.0422127	-2.34297	843	LOC843	CASP10	NA
9991_at	0.199774	8.03032	4.00437	0.000183996	0.00501026	0.21056	9991	LOC9991	PTBP3	Multiple
55573_at	0.199801	8.73614	3.68062	0.000522405	0.0118601	-0.779342	55573	LOC55573	CDV3	Multiple
23313_at	0.199877	5.88936	3.12741	0.00279026	0.0423071	-2.34792	23313	LOC23313	KIAA0930	Myeloid
284759_at	0.19991	2.80516	3.75557	0.000411857	0.00976833	-0.554519	284759	LOC284759	SIRPB2	NA
84243_at	0.200458	4.14134	3.58479	0.000705494	0.0148377	-1.06275	84243	LOC84243	ZDHHC18	Myeloid
199713_at	0.200552	2.8522	3.32137	0.00157693	0.0283771	-1.81716	199713	LOC199713	NLRP7	B Cell
144110_at	0.200647	4.03913	3.38671	0.00129569	0.0243546	-1.63355	144110	LOC144110	TMEM86A	NA
4863_at	0.200915	4.48123	4.188	9.99849e-05	0.00297567	0.792514	4863	LOC4863	NPAT	NA
8773_at	0.20097	8.29039	3.98706	0.000194757	0.00528005	0.156444	8773	LOC8773	SNAP23	Multiple
8837_at	0.201147	7.7753	3.3614	0.00139848	0.0257906	-1.70496	8837	LOC8837	CFLAR	Multiple
10097_at	0.201191	7.97238	4.25063	8.09818e-05	0.00245738	0.99415	10097	LOC10097	ACTR2	Multiple
27128_at	0.201623	3.6857	3.64562	0.000583271	0.0129568	-0.883389	27128	LOC27128	CYTH4	Multiple
55625_at	0.201795	5.91162	3.04879	0.00349696	0.0494232	-2.55669	55625	LOC55625	ZDHHC7	NA
22838_at	0.202242	5.94675	3.07342	0.00325936	0.0471047	-2.4917	22838	LOC22838	RNF44	NA
29802_at	0.202603	2.78534	3.1547	0.00257792	0.0403665	-2.27456	29802	LOC29802	VPREB3	B Cell
83440_at	0.203146	5.43018	3.34528	0.00146788	0.0267255	-1.75023	83440	LOC83440	ADPGK	Multiple
9641_at	0.203347	3.70098	3.95242	0.000218146	0.00576273	0.0485248	9641	LOC9641	IKBKE	NA
132320_at	0.203435	5.67198	3.71863	0.000463201	0.0108067	-0.665666	132320	LOC132320	SCLT1	NA
55320_at	0.203484	5.22009	3.39754	0.00125391	0.0236409	-1.60286	55320	LOC55320	MIS18BP1	Multiple
472_at	0.203815	6.87171	3.619	0.00063404	0.0138526	-0.962113	472	LOC472	ATM	Lymphoid
1233_at	0.204024	3.08871	6.0885	1.07099e-07	7.18026e-06	7.41539	1233	LOC1233	CCR4	NA
5993_at	0.204436	4.82538	3.5415	0.000806988	0.0165625	-1.18927	5993	LOC5993	RFX5	NA
10093_at	0.204466	8.33405	4.37078	5.3851e-05	0.00169791	1.38509	10093	LOC10093	ARPC4	NA
152789_at	0.204772	2.57532	6.89502	5.02843e-09	4.88916e-07	10.407	152789	LOC152789	JAKMIP1	NA
23031_at	0.204841	4.53955	3.72358	0.000455981	0.010665	-0.65081	23031	LOC23031	MAST3	NA
7535_at	0.205279	3.40229	5.00829	5.7545e-06	0.00024178	3.54052	7535	LOC7535	ZAP70	Lymphoid
373156_at	0.205378	8.67721	3.4268	0.00114737	0.0220148	-1.5197	373156	LOC373156	GSTK1	NA
23305_at	0.205415	2.63343	4.44991	4.10572e-05	0.00134951	1.64546	23305	LOC23305	ACSL6	NA
140739_at	0.205518	6.15982	3.14323	0.00266524	0.0410416	-2.30544	140739	LOC140739	UBE2F	Myeloid
126364_at	0.206696	4.58945	3.15152	0.0026019	0.0404827	-2.28314	126364	LOC126364	LRRC25	NA
157769_at	0.207243	7.70679	3.94842	0.000221017	0.00581375	0.0360898	157769	LOC157769	FAM91A1	NA
84250_at	0.207581	5.79334	3.26476	0.00186634	0.0324227	-1.97431	84250	LOC84250	ANKRD32	NA
6881_at	0.207631	8.83302	3.46127	0.0010329	0.0202129	-1.42115	6881	LOC6881	TAF10	NA
4277_at	0.208699	3.71229	5.13306	3.67058e-06	0.000161532	3.976	4277	LOC4277	MICB	NA
151306_at	0.209284	4.07963	3.71616	0.000466844	0.0108459	-0.673072	151306	LOC151306	GPBAR1	NA
924_at	0.209724	3.37445	4.99431	6.05064e-06	0.000252509	3.49196	924	LOC924	CD7	Lymphoid
10385_at	0.209727	5.49309	3.13455	0.00273315	0.0417686	-2.32876	10385	LOC10385	BTN2A2	NA
375387_at	0.210488	4.3365	3.20908	0.00219938	0.03605	-2.1271	375387	LOC375387	NRROS	NA
116985_at	0.210611	3.20637	4.88436	8.96293e-06	0.000349686	3.11196	116985	LOC116985	ARAP1	Myeloid
6836_at	0.210835	6.30129	3.10551	0.00297233	0.0441947	-2.40645	6836	LOC6836	SURF4	NA
7318_at	0.211585	6.21718	3.47015	0.0010052	0.0197959	-1.39563	7318	LOC7318	UBA7	NA
1540_at	0.211636	4.89214	4.13191	0.000120615	0.0035164	0.613284	1540	LOC1540	CYLD	Multiple
7109_at	0.21177	5.48525	4.76647	1.36147e-05	0.000503664	2.70824	NA	NA	TRAPPC10 || ?	NA
80196_at	0.212108	5.44905	3.19293	0.00230599	0.0372063	-2.17109	80196	LOC80196	RNF34	NA
10952_at	0.212386	7.54184	3.41067	0.001205	0.0228581	-1.56561	10952	LOC10952	SEC61B	NA
55589_at	0.213736	5.76955	3.20531	0.00222382	0.0363864	-2.13738	55589	LOC55589	BMP2K	NA
6504_at	0.213779	2.81825	5.89239	2.2356e-07	1.39355e-05	6.6973	6504	LOC6504	SLAMF1	Multiple
4668_at	0.214198	5.98227	3.76751	0.000396465	0.00946369	-0.518461	4668	LOC4668	NAGA	Myeloid
8525_at	0.214569	7.2577	3.61445	0.000643129	0.0139931	-0.975534	8525	LOC8525	DGKZ	NA
64127_at	0.215167	2.77312	3.60799	0.000656256	0.0141767	-0.99458	64127	LOC64127	NOD2	NA
54464_at	0.215864	7.72966	4.8308	1.08424e-05	0.000417747	2.92804	54464	LOC54464	XRN1	NA
10109_at	0.216104	10.6207	4.48761	3.60543e-05	0.00120425	1.7703	10109	LOC10109	ARPC2	NA
128338_at	0.216255	6.92252	3.23485	0.00203883	0.034421	-2.05661	128338	LOC128338	DRAM2	NA
285533_at	0.216343	2.49027	3.10316	0.00299253	0.0444594	-2.41272	285533	LOC285533	RNF175	NA
408_at	0.216749	3.76602	3.17015	0.00246458	0.039086	-2.23285	408	LOC408	ARRB1	NA
9966_at	0.216788	3.72455	3.19902	0.00226521	0.0367721	-2.15451	9966	LOC9966	TNFSF15	Monocyte
147699_at	0.217138	2.73734	3.05558	0.00342988	0.0488283	-2.53881	147699	LOC147699	PPM1N	NA
84689_at	0.217484	2.33827	3.56276	0.00075553	0.0157828	-1.12727	84689	LOC84689	MS4A14	NA
160365_at	0.217496	2.57837	5.00603	5.80148e-06	0.000243204	3.53265	160365	LOC160365	CLECL1	Multiple
58472_at	0.217726	9.41523	3.19913	0.00226451	0.0367721	-2.15423	58472	LOC58472	SQRDL	NA
54509_at	0.217761	3.08048	3.62918	0.000614147	0.0135134	-0.932052	54509	LOC54509	RHOF	NA
162_at	0.219609	5.71879	3.56505	0.000750168	0.0156885	-1.12057	162	LOC162	AP1B1	NA
5912_at	0.219712	5.68536	3.8101	0.000345923	0.0084751	-0.389268	5912	LOC5912	RAP2B	Multiple
1508_at	0.220045	9.99157	3.18233	0.00237858	0.0380799	-2.19987	1508	LOC1508	CTSB	Myeloid
836_at	0.220218	7.19802	3.22648	0.00208974	0.0350149	-2.07956	836	LOC836	CASP3	Multiple
253582_at	0.22031	2.6172	3.2723	0.00182511	0.0318553	-1.95349	253582	LOC253582	TMEM244	NA
23214_at	0.220827	5.01329	3.536	0.000820829	0.0167512	-1.20527	23214	LOC23214	XPO6	Neutrophil
64422_at	0.221005	8.23054	4.33616	6.05987e-05	0.00188822	1.27189	64422	LOC64422	ATG3	NA
3823_at	0.221703	2.07448	4.93063	7.5996e-06	0.000304164	3.27147	3823	LOC3823	KLRC3	Lymphoid
28714_at	0.222298	2.56705	4.49481	3.51692e-05	0.00117893	1.79419	28714	LOC28714	TRAJ41	T Cell
58484_at	0.222335	3.43034	3.51769	0.00086859	0.0174763	-1.25844	58484	LOC58484	NLRC4	NA
266747_at	0.223565	3.65161	3.71423	0.000469711	0.010863	-0.678862	266747	LOC266747	RGL4	Multiple
53346_at	0.223848	4.57904	3.03931	0.00359269	0.0499682	-2.58162	53346	LOC53346	TM6SF1	Multiple
10092_at	0.224647	9.23661	4.52981	3.11583e-05	0.00106433	1.91061	10092	LOC10092	ARPC5	Multiple
51188_at	0.224728	6.4712	3.06622	0.0033272	0.0477877	-2.51074	51188	LOC51188	SS18L2	NA
5567_at	0.224936	6.82855	3.73595	0.000438415	0.0103061	-0.613651	5567	LOC5567	PRKACB	NA
225_at	0.225625	2.28148	6.21896	6.54982e-08	4.62497e-06	7.89563	225	LOC225	ABCD2	NA
4690_at	0.225691	5.34827	3.07266	0.00326646	0.0471602	-2.49371	4690	LOC4690	NCK1	Myeloid
6773_at	0.225904	7.32038	3.54285	0.000803617	0.0165271	-1.18533	6773	LOC6773	STAT2	NA
127544_at	0.22598	5.10961	4.07239	0.000146998	0.00414249	0.424509	127544	LOC127544	RNF19B	Myeloid
5538_at	0.226707	8.51977	4.38841	5.07011e-05	0.00161504	1.44292	5538	LOC5538	PPT1	Myeloid
6672_at	0.226834	6.99709	3.87576	0.000279922	0.00708234	-0.188433	6672	LOC6672	SP100	Lymphoid
81030_at	0.22704	3.22129	3.84931	0.000304908	0.00765195	-0.26958	81030	LOC81030	ZBP1	Lymphoid
5791_at	0.227514	5.44271	3.03911	0.00359472	0.0499682	-2.58214	5791	LOC5791	PTPRE	Myeloid
9744_at	0.227621	3.80614	3.70793	0.000479182	0.0110683	-0.697734	9744	LOC9744	ACAP1	Multiple
1633_at	0.22777	5.87573	3.47932	0.000977367	0.0193298	-1.36928	1633	LOC1633	DCK	NA
399665_at	0.228159	5.82679	4.13745	0.000118405	0.00347377	0.630949	399665	LOC399665	FAM102A	NA
10010_at	0.228543	6.6445	3.65193	0.000571826	0.0127944	-0.864687	10010	LOC10010	TANK	Multiple
1299_at	0.228642	2.86952	3.08001	0.0031984	0.046457	-2.47425	1299	LOC1299	COL9A3	NA
54847_at	0.229805	3.04829	6.57675	1.68876e-08	1.40009e-06	9.22093	54847	LOC54847	SIDT1	NA
145508_at	0.230402	4.15412	3.07908	0.0032069	0.0465276	-2.47671	145508	LOC145508	CEP128	NA
4200_at	0.230775	7.65568	3.77545	0.000386539	0.00928643	-0.494451	4200	LOC4200	ME2	NA
147138_at	0.231851	3.19271	6.17315	7.78561e-08	5.43558e-06	7.72679	147138	LOC147138	TMC8	Lymphoid
55361_at	0.23216	3.73832	5.23923	2.49706e-06	0.000118298	4.34956	55361	LOC55361	PI4K2A	Myeloid
84941_at	0.232342	3.89868	3.54144	0.000807122	0.0165625	-1.18943	84941	LOC84941	HSH2D	NA
79663_at	0.232592	5.59629	3.12027	0.00284845	0.0429721	-2.36704	79663	LOC79663	HSPBAP1	NA
51466_at	0.232597	6.26845	3.54036	0.000809843	0.0165817	-1.19259	51466	LOC51466	EVL	Multiple
83707_at	0.232938	5.69009	3.65801	0.000560994	0.0125824	-0.846636	83707	LOC83707	TRPT1	NA
2885_at	0.233501	7.71779	4.45048	4.09767e-05	0.00134951	1.64734	2885	LOC2885	GRB2	Multiple
10981_at	0.233519	7.42827	3.12707	0.00279298	0.0423071	-2.34883	10981	LOC10981	RAB32	NA
57674_at	0.233993	5.57573	3.17716	0.00241475	0.0385591	-2.21388	57674	LOC57674	RNF213	Multiple
353345_at	0.234298	2.83821	3.71695	0.000465674	0.0108459	-0.670699	353345	LOC353345	GPR141	NA
151636_at	0.234519	7.49968	4.32851	6.21966e-05	0.00192509	1.24694	151636	LOC151636	DTX3L	Multiple
84957_at	0.234603	3.71495	3.96832	0.000207092	0.00552573	0.0979976	84957	LOC84957	RELT	Myeloid
51513_at	0.234894	3.22195	3.81735	0.000337962	0.00833506	-0.367199	51513	LOC51513	ETV7	NA
994_at	0.235126	5.28511	3.04315	0.0035537	0.0496829	-2.57155	994	LOC994	CDC25B	Lymphoid
10094_at	0.23553	7.30813	3.78433	0.000375714	0.00906154	-0.467549	10094	LOC10094	ARPC3	NA
7294_at	0.235574	2.55714	4.11331	0.000128322	0.00369467	0.554154	7294	LOC7294	TXK	NA
4245_at	0.235661	6.93171	4.35032	5.77441e-05	0.0018023	1.31815	4245	LOC4245	MGAT1	NA
23077_at	0.235985	6.23791	3.05796	0.00340674	0.0486291	-2.53256	23077	LOC23077	MYCBP2	NA
54187_at	0.236342	6.17207	3.7254	0.000453359	0.0106171	-0.645355	54187	LOC54187	NANS	NA
11064_at	0.23641	3.32346	4.24529	8.24563e-05	0.00249397	0.97688	11064	LOC11064	CNTRL	NA
54149_at	0.236598	7.07429	3.16751	0.00248364	0.0392876	-2.23999	54149	LOC54149	C21ORF91	Multiple
941_at	0.236751	2.69248	4.61207	2.34081e-05	0.000820211	2.18583	941	LOC941	CD80	Myeloid
23616_at	0.238272	3.96784	4.66687	1.93268e-05	0.000698282	2.37039	23616	LOC23616	SH3BP1	NA
255809_at	0.238285	3.0182	3.40123	0.00123999	0.0234024	-1.59242	255809	LOC255809	C19ORF38	NA
10695_at	0.238636	6.06129	3.82947	0.00032504	0.00805917	-0.330232	10695	LOC10695	CNPY3	NA
4218_at	0.239873	7.9618	5.71542	4.32626e-07	2.50289e-05	6.05386	4218	LOC4218	RAB8A	NA
26051_at	0.240666	3.92116	3.76984	0.000393527	0.00940564	-0.511417	26051	LOC26051	PPP1R16B	NA
3460_at	0.240892	6.27968	3.63569	0.000601735	0.0132875	-0.912793	3460	LOC3460	IFNGR2	NA
1997_at	0.240952	6.71638	5.43261	1.23101e-06	6.35029e-05	5.03637	1997	LOC1997	ELF1	Multiple
961_at	0.240983	8.1037	3.95256	0.000218044	0.00576273	0.0489719	961	LOC961	CD47	NA
3417_at	0.241275	7.72441	3.12377	0.0028198	0.0426437	-2.35768	3417	LOC3417	IDH1	NA
28660_at	0.243054	2.08246	5.97055	1.66815e-07	1.06997e-05	6.9829	28660	LOC28660	TRAV23DV6	T Cell
1622_at	0.2433	8.66398	3.07525	0.0032423	0.0469313	-2.48685	1622	LOC1622	DBI	NA
4946_at	0.243333	7.54934	3.8951	0.000262911	0.00674383	-0.128894	4946	LOC4946	OAZ1	NA
533_at	0.244737	6.36148	3.35575	0.00142243	0.0261544	-1.72083	533	LOC533	ATP6V0B	NA
475_at	0.244828	9.061	3.17819	0.00240745	0.0384756	-2.21107	475	LOC475	ATOX1	NA
829_at	0.244868	9.1177	3.78294	0.000377388	0.0090901	-0.47176	829	LOC829	CAPZA1	NA
3821_at	0.245463	2.7543	3.81654	0.000338835	0.0083455	-0.369644	3821	LOC3821	KLRC1	NA
5778_at	0.246205	2.75736	6.62205	1.42167e-08	1.22799e-06	9.38941	5778	LOC5778	PTPN7	Lymphoid
430_at	0.246334	5.46534	4.38743	5.08714e-05	0.00161769	1.4397	430	LOC430	ASCL2	NA
10096_at	0.247165	9.49471	6.35839	3.86619e-08	2.90685e-06	8.41083	10096	LOC10096	ACTR3	Multiple
9663_at	0.247365	6.0302	3.95074	0.000219345	0.00578615	0.043315	9663	LOC9663	LPIN2	NA
6489_at	0.2477	2.89518	4.79222	1.24304e-05	0.000470017	2.79607	6489	LOC6489	ST8SIA1	NA
976_at	0.247873	4.2623	4.18612	0.000100615	0.00298963	0.786509	976	LOC976	CD97	Multiple
6282_at	0.24864	9.47425	3.37299	0.00135048	0.0251224	-1.67229	6282	LOC6282	S100A11	NA
8905_at	0.248651	8.15773	3.1647	0.00250405	0.0395431	-2.24759	8905	LOC8905	AP1S2	Monocyte
30011_at	0.249579	5.41936	3.59449	0.000684487	0.0145943	-1.03427	30011	LOC30011	SH3KBP1	NA
240_at	0.249857	3.06807	3.26436	0.0018686	0.0324316	-1.97543	240	LOC240	ALOX5	Multiple
6737_at	0.25135	6.54916	4.09622	0.000135824	0.00388059	0.499929	6737	LOC6737	TRIM21	NA
11009_at	0.251389	2.47773	4.66785	1.92601e-05	0.00069723	2.37372	11009	LOC11009	IL24	Monocyte
28727_at	0.251408	2.42039	5.16012	3.32798e-06	0.00015111	4.07098	28727	LOC28727	TRAJ28	T Cell
637_at	0.251663	5.09109	3.14146	0.00267902	0.0412196	-2.31022	637	LOC637	BID	Myeloid
10333_at	0.252395	3.06452	4.46744	3.86521e-05	0.00128409	1.70344	10333	LOC10333	TLR6	NA
26270_at	0.252608	3.15305	4.45238	4.07089e-05	0.00134678	1.65364	26270	LOC26270	FBXO6	Multiple
23064_at	0.252982	6.10532	4.94882	7.12112e-06	0.000289572	3.33436	23064	LOC23064	SETX	NA
126259_at	0.253797	2.8728	3.55156	0.000782223	0.0161767	-1.15995	126259	LOC126259	TMIGD2	Lymphoid
3695_at	0.253942	4.23711	5.14747	3.48402e-06	0.000155956	4.02656	3695	LOC3695	ITGB7	Lymphoid
11320_at	0.253952	6.17929	3.93747	0.000229058	0.0059829	0.00210502	11320	LOC11320	MGAT4A	NA
347454_at	0.254543	3.01234	4.26409	7.7383e-05	0.00235587	1.03766	347454	LOC347454	SOWAHD	NA
4610_at	0.254819	3.45804	5.79578	3.20734e-07	1.91679e-05	6.34544	4610	LOC4610	MYCL	NA
50943_at	0.25615	3.4637	5.93618	1.89752e-07	1.1986e-05	6.85722	50943	LOC50943	FOXP3	NA
10308_at	0.256344	6.49184	3.20432	0.00223031	0.0364605	-2.14009	10308	LOC10308	ZNF267	Multiple
578_at	0.256478	3.26782	3.52946	0.000837604	0.0170561	-1.22429	578	LOC578	BAK1	NA
5613_at	0.257	5.76959	3.10566	0.00297102	0.0441947	-2.40604	5613	LOC5613	PRKX	Lymphoid
84106_at	0.257087	3.83746	3.45638	0.00104844	0.0204523	-1.43516	84106	LOC84106	PRAM1	Monocyte
2322_at	0.258806	2.52637	4.98357	6.28817e-06	0.00025893	3.4547	2322	LOC2322	FLT3	NA
7187_at	0.259245	5.43398	4.35672	5.64974e-05	0.00176635	1.33908	7187	LOC7187	TRAF3	NA
162966_at	0.259675	5.78821	3.65982	0.000557797	0.0125258	-0.841241	162966	LOC162966	ZNF600	NA
51667_at	0.259832	8.52037	4.54363	2.97002e-05	0.00102141	1.95671	51667	LOC51667	NUB1	Dendritic Cell
1992_at	0.260198	7.83404	3.05879	0.00339861	0.0485766	-2.53035	1992	LOC1992	SERPINB1	NA
6982_at	0.260436	2.4757	3.10851	0.00294671	0.0439899	-2.39844	6982	LOC6982	TRGV8	T Cell
159013_at	0.260581	6.61979	3.77215	0.000390632	0.00936055	-0.504426	159013	LOC159013	CXORF38	Multiple
11177_at	0.261257	7.01864	4.24467	8.2629e-05	0.00249513	0.974878	11177	LOC11177	BAZ1A	Multiple
56882_at	0.26242	7.08988	4.95026	7.08466e-06	0.000289163	3.33933	56882	LOC56882	CDC42SE1	Multiple
256586_at	0.262528	3.26932	3.28502	0.00175748	0.0309367	-1.9183	256586	LOC256586	LYSMD2	NA
91353_at	0.262775	4.46898	3.70517	0.000483392	0.0111102	-0.706001	91353	LOC91353	IGLL3P	NA
57217_at	0.262873	4.61391	4.37393	5.32744e-05	0.00168258	1.39542	57217	LOC57217	TTC7A	NA
55331_at	0.263151	5.61721	3.94097	0.000226458	0.00593166	0.0129626	55331	LOC55331	ACER3	Myeloid
29969_at	0.264288	4.55029	3.10576	0.00297018	0.0441947	-2.40578	29969	LOC29969	MDFIC	NA
144811_at	0.264372	5.91016	3.27825	0.00179316	0.0313567	-1.93704	144811	LOC144811	LACC1	Myeloid
81553_at	0.265988	4.44584	3.74219	0.000429796	0.0101549	-0.594866	81553	LOC81553	FAM49A	Myeloid
11059_at	0.266306	7.09121	3.58744	0.0006997	0.0147493	-1.05498	11059	LOC11059	WWP1	NA
1777_at	0.266369	6.49662	3.74031	0.000432377	0.0102029	-0.60053	1777	LOC1777	DNASE2	NA
55233_at	0.267066	8.81363	5.42866	1.24905e-06	6.39747e-05	5.02223	55233	LOC55233	MOB1A	Multiple
641_at	0.267726	3.18125	3.27049	0.00183493	0.0319666	-1.95849	641	LOC641	BLM	NA
10379_at	0.268194	5.67616	5.32553	1.82271e-06	8.9549e-05	4.65509	10379	LOC10379	IRF9	NA
132332_at	0.26825	2.15473	3.59161	0.000690674	0.0146898	-1.04275	132332	LOC132332	TMEM155	NA
9830_at	0.268484	4.91896	5.31536	1.89179e-06	9.24536e-05	4.61897	9830	LOC9830	TRIM14	NA
125111_at	0.269232	3.03443	3.36681	0.00137588	0.0254751	-1.68972	125111	LOC125111	GJD3	NA
55819_at	0.269568	7.8117	4.5978	2.46022e-05	0.0008572	2.13793	55819	LOC55819	RNF130	NA
3344_at	0.269674	6.78559	4.41019	4.70571e-05	0.00152264	1.51449	3344	LOC3344	FOXN2	Multiple
6892_at	0.26998	6.86723	3.78803	0.000371289	0.00897814	-0.456326	6892	LOC6892	TAPBP	NA
10577_at	0.271063	9.89359	4.77037	1.34285e-05	0.000498762	2.72153	10577	LOC10577	NPC2	NA
64115_at	0.271311	4.50686	3.73946	0.000433547	0.0102175	-0.603086	64115	LOC64115	C10ORF54	Myeloid
7188_at	0.271447	5.74834	3.21494	0.00216184	0.0357444	-2.1111	7188	LOC7188	TRAF5	NA
50650_at	0.271555	5.90245	3.22404	0.00210477	0.0351192	-2.08622	50650	LOC50650	ARHGEF3	NA
814_at	0.271761	3.10521	5.18584	3.03168e-06	0.00013936	4.16139	814	LOC814	CAMK4	T Cell
326624_at	0.271796	4.68529	3.26915	0.00184224	0.0320639	-1.9622	326624	LOC326624	RAB37	Multiple
3105_at	0.271868	11.4472	5.01544	5.60878e-06	0.000236192	3.56535	3105	LOC3105	HLA-A	Multiple
81793_at	0.272572	2.21934	5.80428	3.10724e-07	1.87352e-05	6.37634	81793	LOC81793	TLR10	B Cell
3588_at	0.272711	5.95121	3.9754	0.000202348	0.00541471	0.120049	3588	LOC3588	IL10RB	NA
55803_at	0.273591	6.56643	3.35841	0.0014111	0.0259976	-1.71336	NA	NA	ADAP2 || RNF135	NA
23347_at	0.273793	6.13039	3.53289	0.000828764	0.0168946	-1.21431	23347	LOC23347	SMCHD1	Multiple
397_at	0.275329	10.2401	4.79479	1.23176e-05	0.000467389	2.80487	397	LOC397	ARHGDIB	NA
65220_at	0.275511	4.2973	4.61831	2.29043e-05	0.000807126	2.20679	65220	LOC65220	NADK	Myeloid
282969_at	0.27573	5.11113	3.1397	0.00269271	0.0413618	-2.31495	282969	LOC282969	FUOM	NA
6793_at	0.275796	4.60691	3.71591	0.000467221	0.0108459	-0.673836	6793	LOC6793	STK10	Multiple
23550_at	0.27812	4.02398	3.91646	0.000245283	0.00635307	-0.0629506	23550	LOC23550	PSD4	NA
54918_at	0.278587	7.61707	3.91881	0.000243413	0.00631344	-0.0556769	54918	LOC54918	CMTM6	NA
79670_at	0.278601	6.53523	4.56718	2.73685e-05	0.000946482	2.03537	79670	LOC79670	ZCCHC6	Multiple
51393_at	0.280218	4.6312	4.12628	0.000122897	0.00356761	0.595393	51393	LOC51393	TRPV2	Multiple
203197_at	0.280884	4.58009	5.01768	5.56376e-06	0.000235347	3.57315	203197	LOC203197	C9ORF91	NA
162989_at	0.281373	5.30429	3.83501	0.000319295	0.00796993	-0.31332	162989	LOC162989	DEDD2	Multiple
5922_at	0.281667	4.97421	4.11689	0.000126803	0.00366229	0.565523	5922	LOC5922	RASA2	Lymphoid
64222_at	0.282535	5.10434	4.2101	9.28325e-05	0.00278063	0.863484	64222	LOC64222	TOR3A	Multiple
489_at	0.28299	3.98643	5.28445	2.11778e-06	0.000102154	4.50943	489	LOC489	ATP2A3	NA
1509_at	0.283769	6.34402	3.52383	0.000852284	0.0172604	-1.24063	1509	LOC1509	CTSD	Monocyte
256236_at	0.284178	2.76373	5.50185	9.54101e-07	5.07697e-05	5.2841	256236	LOC256236	NAPSB	NA
113802_at	0.284767	4.63754	4.03894	0.00016419	0.00454062	0.319063	113802	LOC113802	HENMT1	NA
6688_at	0.284958	4.38246	4.50782	3.36231e-05	0.0011353	1.83741	6688	LOC6688	SPI1	Myeloid
81537_at	0.284995	7.37168	3.91115	0.00024956	0.00645485	-0.0793798	81537	LOC81537	SGPP1	NA
223082_at	0.285127	6.44527	3.43873	0.00110646	0.0213819	-1.48566	223082	LOC223082	ZNRF2	Multiple
9764_at	0.285462	4.73337	4.53573	3.05253e-05	0.00104591	1.93035	9764	LOC9764	KIAA0513	NA
53_at	0.286105	4.54741	5.61831	6.20385e-07	3.42892e-05	5.70288	53	LOC53	ACP2	NA
921_at	0.286447	3.09861	7.38255	7.82649e-10	1.0164e-07	12.2302	921	LOC921	CD5	T Cell
201266_at	0.286497	5.74793	3.21897	0.00213642	0.0355177	-2.1001	201266	LOC201266	SLC39A11	NA
163486_at	0.287118	5.15798	4.33162	6.15427e-05	0.00190815	1.25707	163486	LOC163486	DENND1B	Multiple
6367_at	0.287216	3.02555	6.35355	3.93779e-08	2.94873e-06	8.39289	6367	LOC6367	CCL22	Myeloid
28737_at	0.288005	2.58554	5.03364	5.25367e-06	0.000223263	3.62866	28737	LOC28737	TRAJ18	T Cell
5336_at	0.288582	6.61205	3.20101	0.00225204	0.036751	-2.14909	5336	LOC5336	PLCG2	Multiple
64780_at	0.288639	7.02748	3.93505	0.000230876	0.0060219	-0.005409	64780	LOC64780	MICAL1	NA
54941_at	0.28877	4.07071	3.93763	0.000228937	0.0059829	0.00261138	54941	LOC54941	RNF125	Lymphoid
6891_at	0.289016	4.97304	5.13906	3.59175e-06	0.000159194	3.99704	6891	LOC6891	TAP2	Multiple
91523_at	0.290808	4.51748	5.39133	1.43247e-06	7.22891e-05	4.88909	91523	LOC91523	PCED1B	Lymphoid
2896_at	0.291125	5.3102	3.31785	0.00159363	0.0286499	-1.827	2896	LOC2896	GRN	NA
85315_at	0.291179	5.11918	4.32383	6.31947e-05	0.00194948	1.23168	85315	LOC85315	PAQR8	NA
1445_at	0.292969	5.18314	7.01449	3.18837e-09	3.32648e-07	10.8533	1445	LOC1445	CSK	Multiple
115004_at	0.293818	4.89609	3.83878	0.000315438	0.00789488	-0.301792	115004	LOC115004	MB21D1	NA
6748_at	0.293977	9.26893	4.06076	0.000152767	0.00426622	0.387801	6748	LOC6748	SSR4	NA
10906_at	0.294013	5.97207	7.76411	1.82696e-10	2.87506e-08	13.6573	10906	LOC10906	TRAFD1	Dendritic Cell
2729_at	0.29466	5.08404	3.61428	0.000643483	0.0139931	-0.976052	2729	LOC2729	GCLC	NA
7357_at	0.295088	8.11412	3.24161	0.00199861	0.0338618	-2.03807	7357	LOC7357	UGCG	Myeloid
27163_at	0.295847	5.14598	6.69729	1.06787e-08	9.5804e-07	9.6695	27163	LOC27163	NAAA	NA
165631_at	0.297885	2.56707	4.75214	1.43209e-05	0.00052664	2.65945	165631	LOC165631	PARP15	NA
81552_at	0.298297	3.64209	3.13195	0.00275383	0.0419534	-2.33575	81552	LOC81552	VOPP1	NA
132160_at	0.298753	4.92629	5.88462	2.30154e-07	1.42949e-05	6.66896	132160	LOC132160	PPM1M	Multiple
25946_at	0.298766	4.21496	4.52847	3.13028e-05	0.00106581	1.90616	25946	LOC25946	ZNF385A	NA
6195_at	0.298977	4.71195	4.3073	6.68458e-05	0.00205189	1.17786	6195	LOC6195	RPS6KA1	NA
5052_at	0.299023	9.84021	3.54938	0.000787533	0.0162503	-1.16631	5052	LOC5052	PRDX1	NA
83666_at	0.299606	6.31187	4.0622	0.000152044	0.00425242	0.392324	83666	LOC83666	PARP9	Multiple
55041_at	0.300981	6.58098	4.52335	3.1863e-05	0.00108177	1.8891	55041	LOC55041	PLEKHB2	Myeloid
5272_at	0.301309	5.86277	4.0579	0.000154219	0.0043003	0.378782	5272	LOC5272	SERPINB9	Monocyte
3600_at	0.302016	3.20105	3.60213	0.000668367	0.0143827	-1.01182	3600	LOC3600	IL15	Myeloid
59345_at	0.303114	6.90754	3.90385	0.000255552	0.0065732	-0.101922	59345	LOC59345	GNB4	Multiple
22807_at	0.303513	3.76952	6.31043	4.63566e-08	3.41623e-06	8.2334	22807	LOC22807	IKZF2	Lymphoid
93978_at	0.30482	2.77425	4.00516	0.000183515	0.00500448	0.213057	93978	LOC93978	CLEC6A	NA
11309_at	0.305217	4.79696	3.44028	0.00110123	0.0213031	-1.48122	11309	LOC11309	SLCO2B1	NA
7292_at	0.30583	4.25254	3.13167	0.00275608	0.0419534	-2.3365	7292	LOC7292	TNFSF4	NA
10553_at	0.306281	7.55777	3.55588	0.000771821	0.0160151	-1.14735	10553	LOC10553	HTATIP2	NA
5858_at	0.306496	3.19255	5.15019	3.44982e-06	0.000155694	4.03612	5858	LOC5858	PZP	NA
57121_at	0.30659	4.3847	5.1541	3.40133e-06	0.000154064	4.04984	57121	LOC57121	LPAR5	NA
5026_at	0.306685	2.74027	5.21835	2.69411e-06	0.000125081	4.27588	5026	LOC5026	P2RX5	Lymphoid
80832_at	0.306738	4.80213	3.59004	0.000694064	0.0146972	-1.04736	80832	LOC80832	APOL4	NA
27350_at	0.308795	7.94798	3.21412	0.00216708	0.0357731	-2.11335	27350	LOC27350	APOBEC3C	NA
55824_at	0.308983	6.54518	3.17377	0.00243876	0.0388091	-2.22307	55824	LOC55824	PAG1	NA
4063_at	0.309094	2.82771	6.22049	6.51208e-08	4.61587e-06	7.90128	4063	LOC4063	LY9	Lymphoid
84034_at	0.309405	5.89741	3.66354	0.000551316	0.0124103	-0.830207	84034	LOC84034	EMILIN2	Myeloid
79668_at	0.310278	5.70125	4.68759	1.79723e-05	0.000651883	2.44042	79668	LOC79668	PARP8	Multiple
1438_at	0.31031	3.58305	4.74058	1.49163e-05	0.000546372	2.62015	1438	LOC1438	CSF2RA	Myeloid
441168_at	0.310366	4.10659	5.38646	1.45829e-06	7.31944e-05	4.87173	441168	LOC441168	FAM26F	NA
5226_at	0.310505	6.3607	3.07761	0.00322048	0.0466881	-2.48061	5226	LOC5226	PGD	Myeloid
53827_at	0.311185	7.80459	3.68551	0.000514411	0.0117216	-0.764774	53827	LOC53827	FXYD5	Multiple
150372_at	0.3114	3.66655	5.14923	3.46192e-06	0.000155694	4.03273	150372	LOC150372	NFAM1	Myeloid
51765_at	0.312212	3.93616	3.67044	0.000539449	0.0122172	-0.809662	51765	LOC51765	MASK	Multiple
474344_at	0.312904	5.26732	4.08988	0.000138716	0.00393296	0.479827	474344	LOC474344	GIMAP6	NA
6303_at	0.313155	9.57402	4.76915	1.34861e-05	0.0004999	2.7174	6303	LOC6303	SAT1	NA
9047_at	0.313805	2.89734	6.93	4.40056e-09	4.44146e-07	10.5377	9047	LOC9047	SH2D2A	Lymphoid
80183_at	0.314231	3.72959	4.4256	4.46341e-05	0.00145986	1.56524	80183	LOC80183	KIAA0226L	Multiple
3570_at	0.31438	5.30834	3.39704	0.0012558	0.0236526	-1.60428	3570	LOC3570	IL6R	Myeloid
9046_at	0.314611	3.86534	5.03377	5.2512e-06	0.000223263	3.62912	9046	LOC9046	DOK2	NA
6398_at	0.314715	3.82936	4.80469	1.18936e-05	0.000453543	2.83869	6398	LOC6398	SECTM1	NA
219855_at	0.314997	4.31395	3.91029	0.000250255	0.00645485	-0.0820226	219855	LOC219855	SLC37A2	NA
9516_at	0.315248	9.39573	4.9324	7.55174e-06	0.000303081	3.27758	9516	LOC9516	LITAF	Myeloid
256380_at	0.315323	2.36863	6.57432	1.70445e-08	1.40682e-06	9.21188	256380	LOC256380	SCML4	NA
5199_at	0.31612	3.74736	3.16974	0.00246757	0.0391001	-2.23397	5199	LOC5199	CFP	Myeloid
7832_at	0.316456	6.96475	3.57852	0.0007194	0.015079	-1.08113	7832	LOC7832	BTG2	NA
25816_at	0.317622	5.9928	3.6925	0.000503171	0.0115221	-0.743901	25816	LOC25816	TNFAIP8	Multiple
9246_at	0.317634	9.31568	6.13042	9.14609e-08	6.2676e-06	7.56951	9246	LOC9246	UBE2L6	NA
9910_at	0.318083	7.21445	3.75177	0.000416877	0.00987478	-0.565985	9910	LOC9910	RABGAP1L	NA
284021_at	0.318963	3.11055	3.59937	0.000674152	0.0144569	-1.01994	284021	LOC284021	MILR1	NA
497189_at	0.319067	2.20804	5.6033	6.55863e-07	3.58236e-05	5.64875	497189	LOC497189	TIFAB	NA
56990_at	0.319806	8.5905	4.64507	2.08592e-05	0.000740682	2.29687	56990	LOC56990	CDC42SE2	Multiple
3717_at	0.319971	5.00118	3.34755	0.00145793	0.0265964	-1.74387	3717	LOC3717	JAK2	NA
23062_at	0.320497	6.57905	5.5001	9.60267e-07	5.09518e-05	5.27784	23062	LOC23062	GGA2	NA
391_at	0.320514	5.88836	5.30632	1.95525e-06	9.53045e-05	4.58694	391	LOC391	RHOG	Myeloid
3660_at	0.32214	6.26255	5.69114	4.73493e-07	2.69731e-05	5.96595	3660	LOC3660	IRF2	Multiple
5058_at	0.322284	6.69625	4.98503	6.2554e-06	0.000258153	3.45976	5058	LOC5058	PAK1	NA
131450_at	0.323522	2.34187	5.58508	7.0161e-07	3.80982e-05	5.58313	131450	LOC131450	CD200R1	NA
9881_at	0.323867	4.99702	5.22988	2.58342e-06	0.00012146	4.31657	9881	LOC9881	TRANK1	NA
64135_at	0.323973	6.4673	3.33758	0.00150222	0.0272705	-1.77183	64135	LOC64135	IFIH1	Dendritic Cell
170954_at	0.324236	6.95086	4.77468	1.32254e-05	0.000493125	2.73624	170954	LOC170954	PPP1R18	Multiple
2000_at	0.324917	7.06259	4.90783	8.24375e-06	0.000326428	3.19281	2000	LOC2000	ELF4	Multiple
285513_at	0.325288	5.26513	4.16177	0.000109164	0.00322304	0.708566	285513	LOC285513	GPRIN3	Multiple
2015_at	0.325715	3.96307	3.21189	0.00218134	0.0358492	-2.11945	2015	LOC2015	EMR1	NA
100128816_at	0.326111	4.66561	3.11381	0.00290204	0.0435329	-2.3843	NA	NA	NA	NA
2752_at	0.326508	6.59327	3.12776	0.00278742	0.0423071	-2.34698	2752	LOC2752	GLUL	NA
55843_at	0.327071	6.49379	3.52458	0.000850324	0.0172395	-1.23846	55843	LOC55843	ARHGAP15	Multiple
10791_at	0.327429	7.15875	3.46446	0.00102285	0.0200797	-1.41197	10791	LOC10791	VAMP5	NA
30009_at	0.328384	3.72371	4.22896	8.71218e-05	0.00261803	0.924215	30009	LOC30009	TBX21	Lymphoid
644_at	0.328875	7.04638	5.46669	1.08602e-06	5.71345e-05	5.15818	644	LOC644	BLVRA	Myeloid
51744_at	0.329405	3.41073	5.89232	2.23617e-07	1.39355e-05	6.69706	51744	LOC51744	CD244	NK Cell
28586_at	0.329418	2.40505	4.94864	7.12587e-06	0.000289572	3.33372	28586	LOC28586	TRBV9	T Cell
2212_at	0.329426	8.49825	3.25498	0.00192119	0.0331276	-2.00129	2212	LOC2212	FCGR2A	Myeloid
5583_at	0.32997	5.05439	3.21249	0.00217749	0.0358492	-2.11781	5583	LOC5583	PRKCH	Lymphoid
55601_at	0.330493	7.01784	3.2236	0.00210753	0.0351337	-2.08744	55601	LOC55601	DDX60	NA
2185_at	0.330713	3.90845	5.6124	6.34112e-07	3.48405e-05	5.68157	2185	LOC2185	PTK2B	NA
7462_at	0.330858	4.29818	4.45204	4.07566e-05	0.00134678	1.65252	7462	LOC7462	LAT2	Multiple
29108_at	0.331689	5.01759	5.1791	3.10677e-06	0.000142327	4.13766	29108	LOC29108	PYCARD	NA
9111_at	0.332055	7.50807	4.98912	6.16417e-06	0.000255524	3.47397	9111	LOC9111	NMI	Multiple
9672_at	0.332289	5.56148	4.20913	9.31344e-05	0.00278518	0.860378	9672	LOC9672	SDC3	NA
2876_at	0.332679	8.3987	3.68231	0.000519626	0.0118115	-0.774302	2876	LOC2876	GPX1	NA
8676_at	0.332714	3.60391	6.11664	9.63318e-08	6.55303e-06	7.51884	8676	LOC8676	STX11	Multiple
80709_at	0.332925	3.24929	6.86584	5.61995e-09	5.35221e-07	10.2981	80709	LOC80709	AKNA	Multiple
23157_at	0.334069	5.90712	4.3913	5.02029e-05	0.00160468	1.45239	23157	LOC23157	SEPT6	Lymphoid
126731_at	0.334127	4.28175	4.40822	4.73753e-05	0.00152744	1.50803	126731	LOC126731	CCSAP	NA
92106_at	0.334707	6.92248	4.90609	8.29514e-06	0.000327764	3.1868	92106	LOC92106	OXNAD1	T Cell
55024_at	0.33516	3.05666	3.36229	0.00139474	0.0257728	-1.70245	55024	LOC55024	BANK1	B Cell
28662_at	0.335212	2.24352	5.21336	2.74333e-06	0.000127048	4.25831	28662	LOC28662	TRAV21	T Cell
55315_at	0.335318	3.30762	5.37411	1.52581e-06	7.61713e-05	4.82777	55315	LOC55315	SLC29A3	NA
9051_at	0.33537	3.61564	4.82309	1.11428e-05	0.000428431	2.90165	9051	LOC9051	PSTPIP1	NA
2512_at	0.335579	11.0134	5.27294	2.2085e-06	0.000106254	4.46872	2512	LOC2512	FTL	NA
58191_at	0.33618	7.89104	3.79634	0.000361537	0.00877662	-0.43111	58191	LOC58191	CXCL16	NA
6789_at	0.337599	7.93914	6.2954	4.90674e-08	3.6017e-06	8.17786	6789	LOC6789	STK4	Multiple
157_at	0.338058	4.78521	4.64822	2.06307e-05	0.000734054	2.30748	157	LOC157	ADRBK2	NA
837_at	0.340115	7.47739	4.50483	3.39725e-05	0.00114294	1.82747	837	LOC837	CASP4	NA
85479_at	0.340169	3.18882	4.30433	6.75236e-05	0.00206927	1.16819	85479	LOC85479	DNAJC5B	Monocyte
695_at	0.340566	2.66925	7.39413	7.48824e-10	9.79325e-08	12.2735	695	LOC695	BTK	NA
54072_at	0.341534	2.56802	5.00292	5.86646e-06	0.000245374	3.52187	54072	LOC54072	LINC00158	Monocyte
5966_at	0.341767	4.79984	4.62321	2.25151e-05	0.000794919	2.22329	5966	LOC5966	REL	Myeloid
54491_at	0.342407	3.21862	7.04102	2.88145e-09	3.07537e-07	10.9525	54491	LOC54491	FAM105A	NA
6932_at	0.342776	3.29575	6.14561	8.63743e-08	5.96304e-06	7.62539	6932	LOC6932	TCF7	T Cell
7074_at	0.342789	4.21537	4.13657	0.000118754	0.00347852	0.628136	7074	LOC7074	TIAM1	NA
114294_at	0.343625	7.3628	5.22569	2.62312e-06	0.000122672	4.30178	114294	LOC114294	LACTB	Myeloid
2634_at	0.344182	9.35125	5.42834	1.25049e-06	6.39747e-05	5.02111	2634	LOC2634	GBP2	Multiple
5795_at	0.345833	5.20757	6.61684	1.45012e-08	1.24103e-06	9.37001	5795	LOC5795	PTPRJ	Multiple
3430_at	0.346206	6.09846	3.59494	0.000683536	0.0145943	-1.03296	3430	LOC3430	IFI35	Multiple
79930_at	0.346401	4.22104	4.76356	1.37553e-05	0.000507852	2.69832	79930	LOC79930	DOK3	NA
6252_at	0.350015	4.24848	4.0623	0.000151994	0.00425242	0.392638	6252	LOC6252	RTN1	NA
5293_at	0.350542	3.541	6.61968	1.43455e-08	1.23338e-06	9.38058	5293	LOC5293	PIK3CD	Multiple
26578_at	0.351645	7.45211	4.8927	8.70077e-06	0.000342335	3.14065	26578	LOC26578	OSTF1	NA
64170_at	0.352069	4.29477	5.2393	2.49637e-06	0.000118298	4.34982	64170	LOC64170	CARD9	NA
2672_at	0.3521	4.11961	8.39565	1.6628e-11	3.32042e-09	16.0094	2672	LOC2672	GFI1	NA
79958_at	0.352188	6.29702	3.33067	0.00153363	0.0277214	-1.79116	79958	LOC79958	DENND1C	NA
54809_at	0.352341	8.09809	3.77484	0.000387287	0.00929239	-0.496283	54809	LOC54809	SAMD9	Multiple
945_at	0.35257	3.36889	6.04921	1.24152e-07	8.14707e-06	7.27115	945	LOC945	CD33	NA
2517_at	0.354326	7.48577	4.15502	0.000111658	0.00329143	0.686988	2517	LOC2517	FUCA1	NA
1124_at	0.35528	4.08646	5.70546	4.48951e-07	2.58928e-05	6.01778	1124	LOC1124	CHN2	NA
51291_at	0.356232	3.52287	7.05973	2.68296e-09	2.89682e-07	11.0225	51291	LOC51291	GMIP	Multiple
84541_at	0.3563	3.18643	3.9696	0.000206223	0.00551047	0.101998	84541	LOC84541	KBTBD8	Multiple
10346_at	0.356389	7.70484	5.2308	2.5748e-06	0.00012146	4.31981	10346	LOC10346	TRIM22	NA
1606_at	0.356411	4.7888	3.88063	0.000275538	0.00699045	-0.173443	1606	LOC1606	DGKA	T Cell
9267_at	0.357133	5.29896	7.53926	4.30457e-10	6.05607e-08	12.8166	9267	LOC9267	CYTH1	Multiple
64761_at	0.358309	6.73296	5.258	2.33211e-06	0.000111623	4.41587	64761	LOC64761	PARP12	NA
92241_at	0.35849	6.23807	4.46497	3.89816e-05	0.00129273	1.69529	92241	LOC92241	RCSD1	Multiple
23231_at	0.358556	7.60836	3.62047	0.000631123	0.0138214	-0.957766	23231	LOC23231	SEL1L3	NA
6386_at	0.358849	7.93986	4.28889	7.11521e-05	0.00217688	1.11805	6386	LOC6386	SDCBP	NA
152007_at	0.35896	6.63046	3.59476	0.000683921	0.0145943	-1.03349	152007	LOC152007	GLIPR2	Multiple
27074_at	0.359999	3.63654	3.70628	0.000481692	0.0111102	-0.702673	27074	LOC27074	LAMP3	NA
10095_at	0.360373	7.36352	4.93734	7.41948e-06	0.00030019	3.29467	10095	LOC10095	ARPC1B	NA
115352_at	0.360656	3.35918	5.38936	1.44285e-06	7.26155e-05	4.88208	115352	LOC115352	FCRL3	Lymphoid
1317_at	0.360897	6.19039	5.03221	5.28067e-06	0.000223898	3.6237	1317	LOC1317	SLC31A1	Monocyte
171586_at	0.362749	3.88855	4.8506	1.01064e-05	0.000391013	2.99594	171586	LOC171586	ABHD3	NA
23307_at	0.364764	5.6702	5.67131	5.09679e-07	2.85959e-05	5.89423	23307	LOC23307	FKBP15	NA
139818_at	0.364788	6.47036	3.1108	0.00292733	0.0437793	-2.39233	139818	LOC139818	DOCK11	NA
972_at	0.367651	11.7252	6.54584	1.89919e-08	1.53732e-06	9.10604	972	LOC972	CD74	Multiple
51177_at	0.368011	8.56879	4.89327	8.68315e-06	0.000342335	3.14261	51177	LOC51177	PLEKHO1	NA
6404_at	0.368972	4.064	5.96457	1.70598e-07	1.08872e-05	6.96102	6404	LOC6404	SELPLG	Multiple
5580_at	0.369364	4.59659	4.11028	0.000129624	0.0037264	0.544514	5580	LOC5580	PRKCD	NA
200316_at	0.369394	4.75977	3.88517	0.000271515	0.00690955	-0.159478	200316	LOC200316	APOBEC3F	NA
23765_at	0.369491	5.99257	3.58862	0.000697129	0.0147225	-1.05151	23765	LOC23765	IL17RA	Myeloid
401494_at	0.369759	5.09198	5.14738	3.4851e-06	0.000155956	4.02626	401494	LOC401494	PTPLAD2	NA
3635_at	0.370437	4.6378	6.44417	2.79342e-08	2.19495e-06	8.72862	3635	LOC3635	INPP5D	Multiple
3601_at	0.370645	5.51216	5.14918	3.46247e-06	0.000155694	4.03257	3601	LOC3601	IL15RA	NA
91937_at	0.370783	4.31363	3.96269	0.000210945	0.00560437	0.0804596	91937	LOC91937	TIMD4	NA
83442_at	0.371024	8.97039	4.9466	7.17811e-06	0.000291058	3.32665	83442	LOC83442	SH3BGRL3	NA
51338_at	0.372029	6.04252	3.08013	0.00319731	0.046457	-2.47394	51338	LOC51338	MS4A4A	NA
3118_at	0.373699	3.59229	3.71636	0.000466555	0.0108459	-0.672487	3118	LOC3118	HLA-DQA2	NA
113263_at	0.373904	5.39073	3.88725	0.000269697	0.0068943	-0.153096	113263	LOC113263	GLCCI1	NA
1130_at	0.374056	5.68789	4.64176	2.11026e-05	0.000747893	2.2857	1130	LOC1130	LYST	Multiple
27180_at	0.376027	3.75443	4.32629	6.26683e-05	0.00193646	1.2397	27180	LOC27180	SIGLEC9	NA
9535_at	0.376631	8.81087	4.07716	0.000144692	0.00408992	0.439588	9535	LOC9535	GMFG	NA
51225_at	0.376697	6.73432	4.416	4.61282e-05	0.00150289	1.53363	51225	LOC51225	ABI3	NA
30817_at	0.376731	3.87539	4.79058	1.25027e-05	0.000470017	2.79047	30817	LOC30817	EMR2	Myeloid
1240_at	0.377186	4.97525	4.18317	0.000101616	0.00301455	0.777047	1240	LOC1240	CMKLR1	NA
9834_at	0.377706	3.49411	3.70547	0.000482931	0.0111102	-0.705101	9834	LOC9834	KIAA0125	B Cell
3902_at	0.378577	3.79879	7.45433	5.9515e-10	7.95146e-08	12.4988	3902	LOC3902	LAG3	T Cell
8519_at	0.37896	7.97759	3.42226	0.00116333	0.0222707	-1.53264	8519	LOC8519	IFITM1	Myeloid
3431_at	0.379077	6.74352	5.68781	4.79384e-07	2.71422e-05	5.95391	3431	LOC3431	SP110	Multiple
92797_at	0.379083	4.40834	4.64876	2.05916e-05	0.000734054	2.30931	92797	LOC92797	HELB	NA
10384_at	0.381502	5.34291	5.7614	3.64572e-07	2.14255e-05	6.22059	10384	LOC10384	BTN3A3	Lymphoid
203100_at	0.382683	3.29871	3.69009	0.000507009	0.0115671	-0.75108	203100	LOC203100	HTRA4	NA
7099_at	0.382898	6.72825	5.22507	2.62902e-06	0.000122672	4.2996	7099	LOC7099	TLR4	Myeloid
11123_at	0.383076	6.06114	4.77571	1.31772e-05	0.000492381	2.73976	11123	LOC11123	RCAN3	NA
51379_at	0.383122	6.14582	6.39797	3.32807e-08	2.55395e-06	8.55736	51379	LOC51379	CRLF3	Multiple
1806_at	0.383136	5.6315	5.08267	4.40329e-06	0.000191059	3.79966	1806	LOC1806	DPYD	Myeloid
3718_at	0.385003	3.81038	7.06518	2.62772e-09	2.87056e-07	11.0429	3718	LOC3718	JAK3	Multiple
7185_at	0.385115	3.41237	7.91212	1.04015e-10	1.74023e-08	14.21	7185	LOC7185	TRAF1	Myeloid
7128_at	0.385164	5.42886	4.3316	6.15465e-05	0.00190815	1.25701	7128	LOC7128	TNFAIP3	Multiple
409_at	0.385534	9.18825	5.39628	1.40669e-06	7.11814e-05	4.90674	409	LOC409	ARRB2	Multiple
54625_at	0.386444	8.03825	4.99047	6.13454e-06	0.000255436	3.47863	54625	LOC54625	PARP14	Multiple
1436_at	0.387659	7.87559	3.65623	0.000564142	0.0126377	-0.851918	1436	LOC1436	CSF1R	Myeloid
959_at	0.388055	3.46182	6.99492	3.43548e-09	3.54446e-07	10.7802	959	LOC959	CD40LG	NA
11119_at	0.388098	7.19825	6.06948	1.15041e-07	7.6301e-06	7.34555	11119	LOC11119	BTN3A1	NA
57168_at	0.388223	4.38241	5.45371	1.13914e-06	5.90923e-05	5.11176	57168	LOC57168	ASPHD2	NA
28673_at	0.38959	2.96275	5.82075	2.922e-07	1.77335e-05	6.43625	28673	LOC28673	TRAV12-2	T Cell
10461_at	0.390267	4.6687	3.04909	0.00349402	0.0494232	-2.55592	10461	LOC10461	MERTK	NA
375298_at	0.390586	5.21486	5.77199	3.50476e-07	2.07283e-05	6.25902	375298	LOC375298	CERKL	NA
28711_at	0.390606	2.40225	4.8225	1.11664e-05	0.000428454	2.89961	28711	LOC28711	TRAJ44	T Cell
10287_at	0.390677	5.89345	4.4255	4.46501e-05	0.00145986	1.5649	10287	LOC10287	RGS19	Multiple
27181_at	0.390863	3.2928	4.41016	4.70623e-05	0.00152264	1.51439	27181	LOC27181	SIGLEC8	NA
3133_at	0.391291	9.06329	7.00795	3.26887e-09	3.39141e-07	10.8289	3133	LOC3133	HLA-E	NA
50515_at	0.391415	6.32366	3.4197	0.00117242	0.0223542	-1.53993	50515	LOC50515	CHST11	NA
55619_at	0.39286	6.79309	5.14104	3.56604e-06	0.000158813	4.004	55619	LOC55619	DOCK10	Multiple
11221_at	0.39297	4.53002	4.78125	1.29221e-05	0.0004848	2.75863	11221	LOC11221	DUSP10	NA
2681_at	0.393801	5.64268	3.2461	0.00197226	0.0336026	-2.02571	2681	LOC2681	GGTA1P	NA
9806_at	0.394661	5.13879	5.01706	5.57605e-06	0.000235347	3.57101	9806	LOC9806	SPOCK2	NA
83706_at	0.396038	4.79964	5.0655	4.68446e-06	0.000202314	3.7397	83706	LOC83706	FERMT3	Multiple
8522_at	0.396061	6.08618	3.64931	0.000576553	0.0128383	-0.872457	8522	LOC8522	GAS7	NA
51316_at	0.396335	3.66127	4.10565	0.000131634	0.00377249	0.529832	51316	LOC51316	PLAC8	NA
5873_at	0.399189	6.19939	5.93726	1.88987e-07	1.1986e-05	6.86116	5873	LOC5873	RAB27A	NA
58527_at	0.400281	6.98634	4.57469	2.66632e-05	0.000923811	2.06049	58527	LOC58527	ABRACL	NA
3587_at	0.400387	3.44054	8.74001	4.5444e-12	1.0419e-09	17.2826	3587	LOC3587	IL10RA	Multiple
203328_at	0.401541	3.32687	3.7604	0.000405566	0.00964376	-0.539949	203328	LOC203328	SUSD3	NA
54734_at	0.401599	4.71904	3.64314	0.000587834	0.0130426	-0.890742	54734	LOC54734	RAB39A	NA
10184_at	0.402433	7.93354	3.80918	0.000346947	0.008489	-0.39207	10184	LOC10184	LHFPL2	NA
330_at	0.402749	9.74207	3.12084	0.00284374	0.0429359	-2.36551	330	LOC330	BIRC3	Multiple
54518_at	0.403035	8.75338	3.55454	0.000775036	0.0160638	-1.15126	54518	LOC54518	APBB1IP	Multiple
51303_at	0.403038	5.16679	3.98241	0.000197747	0.00531457	0.14194	51303	LOC51303	FKBP11	B Cell
728_at	0.403694	5.16264	3.15774	0.00255528	0.0401472	-2.26637	728	LOC728	C5AR1	Myeloid
7494_at	0.404096	7.60637	3.79565	0.000362329	0.00878436	-0.433183	7494	LOC7494	XBP1	NA
356_at	0.404228	3.27561	9.48078	2.88015e-13	8.62699e-11	19.9893	356	LOC356	FASLG	Lymphoid
5696_at	0.404431	7.55743	4.85099	1.00926e-05	0.000391013	2.99726	5696	LOC5696	PSMB8	NA
79713_at	0.404611	4.57298	5.24354	2.45818e-06	0.000117053	4.36478	79713	LOC79713	IGFLR1	Multiple
55196_at	0.40497	7.38745	5.74764	3.8375e-07	2.24108e-05	6.17064	55196	LOC55196	KIAA1551	NA
84174_at	0.405231	3.54879	9.27985	6.05741e-13	1.70443e-10	19.26	84174	LOC84174	SLA2	NA
8942_at	0.405587	3.41243	4.40016	4.8703e-05	0.00156241	1.4815	8942	LOC8942	KYNU	Myeloid
26253_at	0.405863	3.24564	3.14537	0.00264874	0.0409233	-2.29969	26253	LOC26253	CLEC4E	Myeloid
1193_at	0.407855	6.49166	4.39841	4.89946e-05	0.00156876	1.47577	1193	LOC1193	CLIC2	Dendritic Cell
2760_at	0.407917	8.12821	5.46336	1.09941e-06	5.75227e-05	5.14627	2760	LOC2760	GM2A	Myeloid
79887_at	0.409949	6.52688	4.16277	0.000108801	0.00321743	0.711752	79887	LOC79887	PLBD1	Myeloid
64926_at	0.410365	4.67084	7.2916	1.10743e-09	1.36143e-07	11.8899	64926	LOC64926	RASAL3	Lymphoid
23312_at	0.410465	5.47343	5.08441	4.37567e-06	0.000190306	3.80575	23312	LOC23312	DMXL2	NA
57713_at	0.410758	4.68643	4.79058	1.25026e-05	0.000470017	2.79048	57713	LOC57713	SFMBT2	Multiple
752_at	0.411334	3.44111	5.46213	1.10437e-06	5.76104e-05	5.14189	752	LOC752	FMNL1	Multiple
80301_at	0.411541	6.61238	6.0036	1.47359e-07	9.56855e-06	7.10391	80301	LOC80301	PLEKHO2	NA
2833_at	0.411543	3.44293	8.58363	8.18228e-12	1.7669e-09	16.7054	2833	LOC2833	CXCR3	NA
286336_at	0.412497	3.79064	7.32141	9.88359e-10	1.23187e-07	12.0014	286336	LOC286336	FAM78A	NA
374403_at	0.41523	3.37589	7.09288	2.36421e-09	2.66095e-07	11.1464	374403	LOC374403	TBC1D10C	Multiple
4938_at	0.415539	6.35011	3.53689	0.000818582	0.0167238	-1.20269	4938	LOC4938	OAS1	Dendritic Cell
5699_at	0.416303	5.11527	6.90289	4.8798e-09	4.82036e-07	10.4364	5699	LOC5699	PSMB10	NA
7133_at	0.416456	5.94309	5.37807	1.50383e-06	7.52766e-05	4.84186	7133	LOC7133	TNFRSF1B	Multiple
55303_at	0.416735	8.35682	5.22091	2.66907e-06	0.000124229	4.28493	55303	LOC55303	GIMAP4	Multiple
6275_at	0.420431	8.62154	3.6484	0.0005782	0.0128596	-0.875148	6275	LOC6275	S100A4	NA
5142_at	0.420506	3.98113	4.05421	0.000156114	0.0043401	0.36714	5142	LOC5142	PDE4B	Multiple
113_at	0.421448	5.29096	5.93637	1.89619e-07	1.1986e-05	6.8579	113	LOC113	ADCY7	Multiple
145864_at	0.421958	3.94129	5.69704	4.63229e-07	2.65143e-05	5.98729	145864	LOC145864	HAPLN3	NA
7124_at	0.422131	3.72957	6.89575	5.01435e-09	4.88916e-07	10.4097	7124	LOC7124	TNF	Multiple
64747_at	0.422805	8.29646	5.98781	1.56351e-07	1.01171e-05	7.04611	64747	LOC64747	MFSD1	Myeloid
22797_at	0.423252	5.33414	3.1728	0.00244563	0.0388778	-2.22568	22797	LOC22797	TFEC	Myeloid
4615_at	0.425296	6.77593	6.15455	8.3511e-08	5.80855e-06	7.65831	4615	LOC4615	MYD88	NA
9980_at	0.427209	5.45723	3.25943	0.00189603	0.0327851	-1.98901	9980	LOC9980	DOPEY2	NA
10125_at	0.428193	4.25807	4.98983	6.14864e-06	0.000255451	3.47641	10125	LOC10125	RASGRP1	Multiple
940_at	0.430067	3.77859	4.41256	4.66761e-05	0.00151808	1.5223	940	LOC940	CD28	NA
112616_at	0.430455	5.04336	5.429	1.24749e-06	6.39747e-05	5.02345	112616	LOC112616	CMTM7	NA
9473_at	0.430989	4.27602	4.97668	6.44542e-06	0.000264818	3.4308	9473	LOC9473	THEMIS2	Myeloid
23048_at	0.431625	6.49336	5.5579	7.7579e-07	4.176e-05	5.48534	23048	LOC23048	FNBP1	Multiple
54209_at	0.431919	6.18846	3.46314	0.001027	0.0201398	-1.41577	54209	LOC54209	TREM2	Myeloid
4064_at	0.433354	4.05966	6.67353	1.16888e-08	1.03693e-06	9.58104	4064	LOC4064	CD180	NA
50619_at	0.433502	2.62764	6.02498	1.35989e-07	8.86125e-06	7.18227	50619	LOC50619	DEF6	Multiple
4125_at	0.433766	6.47916	6.09651	1.03917e-07	6.99218e-06	7.44484	4125	LOC4125	MAN2B1	NA
23406_at	0.433821	6.23866	6.04993	1.23819e-07	8.14707e-06	7.27377	23406	LOC23406	COTL1	Multiple
28666_at	0.435458	2.26198	6.36314	3.79739e-08	2.86672e-06	8.42838	28666	LOC28666	TRAV17	T Cell
26279_at	0.436083	3.26118	5.4363	1.21445e-06	6.28235e-05	5.04953	26279	LOC26279	PLA2G2D	NA
7454_at	0.436427	4.62134	6.19576	7.14912e-08	5.01005e-06	7.8101	7454	LOC7454	WAS	Multiple
3123_at	0.439453	11.0251	7.33411	9.41589e-10	1.1815e-07	12.0489	3123	LOC3123	HLA-DRB1	NA
54739_at	0.440081	5.971	3.74945	0.000419976	0.00993552	-0.572995	54739	LOC54739	XAF1	Multiple
5641_at	0.441062	6.3457	3.92565	0.000238054	0.00619175	-0.0345183	5641	LOC5641	LGMN	NA
2811_at	0.441839	4.61573	3.21725	0.00214723	0.0355869	-2.10479	2811	LOC2811	GP1BA	NA
286530_at	0.442063	6.70523	3.56608	0.00074777	0.015656	-1.11755	286530	LOC286530	P2RY8	Multiple
84329_at	0.443372	5.52959	7.14596	1.93066e-09	2.26926e-07	11.345	84329	LOC84329	HVCN1	Multiple
4815_at	0.444787	4.14816	4.39063	5.03179e-05	0.00160559	1.45019	4815	LOC4815	NINJ2	NA
9034_at	0.444822	4.13616	3.60163	0.000669409	0.0143884	-1.01328	9034	LOC9034	CCRL2	Monocyte
639_at	0.447026	5.57484	3.85184	0.000302425	0.00759991	-0.261823	639	LOC639	PRDM1	Multiple
4354_at	0.447258	6.62927	4.98567	6.24102e-06	0.000258134	3.46198	4354	LOC4354	MPP1	NA
11118_at	0.450509	6.84823	4.00672	0.00018258	0.0049863	0.217921	11118	LOC11118	BTN3A2	Lymphoid
64333_at	0.451426	4.03873	5.57207	7.36191e-07	3.97436e-05	5.53632	64333	LOC64333	ARHGAP9	Multiple
4939_at	0.451596	5.49046	3.97828	0.000200445	0.00537927	0.129046	4939	LOC4939	OAS2	Multiple
146722_at	0.452145	4.58395	6.41849	3.07907e-08	2.39253e-06	8.6334	146722	LOC146722	CD300LF	NA
140564_at	0.452588	6.53173	7.62741	3.07576e-10	4.64389e-08	13.1463	140564	LOC140564	APOBEC3D	NA
59342_at	0.452596	7.21777	5.92844	1.95336e-07	1.22969e-05	6.82893	59342	LOC59342	SCPEP1	NA
9935_at	0.456521	6.18566	4.27091	7.56203e-05	0.00230599	1.05973	9935	LOC9935	MAFB	Myeloid
5777_at	0.457105	7.28509	5.81416	2.9947e-07	1.81155e-05	6.41229	5777	LOC5777	PTPN6	Multiple
25939_at	0.457405	9.38418	6.53918	1.94785e-08	1.5592e-06	9.08128	25939	LOC25939	SAMHD1	Multiple
929_at	0.457416	6.65773	3.6408	0.000592161	0.0131073	-0.897663	929	LOC929	CD14	NA
5292_at	0.457446	5.18686	4.88861	8.82851e-06	0.000345895	3.12657	5292	LOC5292	PIM1	Multiple
6776_at	0.457957	6.16657	8.3163	2.24465e-11	4.29746e-09	15.7149	6776	LOC6776	STAT5A	Multiple
10866_at	0.460041	6.71671	5.57382	7.31436e-07	3.9602e-05	5.54262	10866	LOC10866	HCP5	NA
80342_at	0.460076	4.49343	8.88752	2.61394e-12	6.22353e-10	17.8253	80342	LOC80342	TRAF3IP3	Multiple
114769_at	0.460523	5.6805	6.02896	1.3397e-07	8.76044e-06	7.19686	114769	LOC114769	CARD16	NA
1535_at	0.460652	6.20846	5.27007	2.23178e-06	0.000107097	4.45854	1535	LOC1535	CYBA	Multiple
64859_at	0.460767	6.64145	4.25786	7.90299e-05	0.00240207	1.0175	64859	LOC64859	NABP1	Multiple
197358_at	0.460849	4.51663	7.41853	6.82246e-10	8.98581e-08	12.3649	197358	LOC197358	NLRC3	Lymphoid
608_at	0.461248	2.59532	4.04372	0.000161619	0.00448643	0.334103	608	LOC608	TNFRSF17	B Cell
55577_at	0.463835	6.52548	7.33725	9.30358e-10	1.17535e-07	12.0607	55577	LOC55577	NAGK	Myeloid
3385_at	0.465073	6.7643	5.61622	6.25198e-07	3.44527e-05	5.69535	3385	LOC3385	ICAM3	Multiple
4773_at	0.4653	4.74493	6.83687	6.27587e-09	5.94638e-07	10.19	4773	LOC4773	NFATC2	NA
3965_at	0.466457	5.59766	6.52645	2.04435e-08	1.62942e-06	9.03398	3965	LOC3965	LGALS9	NA
168537_at	0.467469	7.97166	4.58924	2.53471e-05	0.000881499	2.10922	168537	LOC168537	GIMAP7	Multiple
58475_at	0.467596	6.06404	3.71519	0.000468286	0.0108571	-0.675988	58475	LOC58475	MS4A7	Myeloid
10863_at	0.469265	6.29263	4.65764	1.99618e-05	0.00071843	2.33924	10863	LOC10863	ADAM28	NA
7456_at	0.469665	7.42055	6.86689	5.59753e-09	5.35221e-07	10.302	7456	LOC7456	WIPF1	Multiple
4050_at	0.470015	4.54304	6.4119	3.1569e-08	2.43265e-06	8.60899	4050	LOC4050	LTB	Multiple
971_at	0.470219	2.84196	5.33644	1.75145e-06	8.62764e-05	4.69381	971	LOC971	CD72	NA
933_at	0.471394	4.76102	3.78678	0.000372778	0.00900241	-0.460117	933	LOC933	CD22	NA
80830_at	0.472548	5.46059	6.59375	1.58312e-08	1.33637e-06	9.28414	80830	LOC80830	APOL6	NA
1493_at	0.474296	3.45389	7.26349	1.23286e-09	1.48671e-07	11.7847	1493	LOC1493	CTLA4	T Cell
6614_at	0.474424	5.39243	3.5946	0.000684264	0.0145943	-1.03397	6614	LOC6614	SIGLEC1	Dendritic Cell
8631_at	0.474681	5.69473	3.22751	0.00208343	0.0350149	-2.07674	8631	LOC8631	SKAP1	NA
51284_at	0.475264	4.17086	4.95055	7.07739e-06	0.000289163	3.34032	51284	LOC51284	TLR7	NA
64744_at	0.475281	6.6998	5.87489	2.38681e-07	1.47752e-05	6.63348	64744	LOC64744	SMAP2	Multiple
80008_at	0.475743	2.9868	4.93524	7.47545e-06	0.000301797	3.2874	80008	LOC80008	TMEM156	B Cell
1512_at	0.476117	8.9203	6.28073	5.18666e-08	3.77731e-06	8.12364	1512	LOC1512	CTSH	NA
10062_at	0.477064	4.97623	4.24672	8.20587e-05	0.00248599	0.981507	10062	LOC10062	NR1H3	NA
154_at	0.478808	5.09023	4.71193	1.64995e-05	0.000600808	2.52285	154	LOC154	ADRB2	NA
89790_at	0.479398	4.70025	5.73523	4.01889e-07	2.33234e-05	6.12565	89790	LOC89790	SIGLEC10	NA
10219_at	0.480385	4.18202	7.59349	3.50033e-10	5.20036e-08	13.0194	10219	LOC10219	KLRG1	Lymphoid
6916_at	0.481268	5.17086	5.66117	5.29229e-07	2.96033e-05	5.85758	6916	LOC6916	TBXAS1	NA
6001_at	0.483062	7.13896	5.36956	1.55145e-06	7.7244e-05	4.81158	6001	LOC6001	RGS10	NA
51571_at	0.483662	7.16198	5.69897	4.59915e-07	2.6443e-05	5.99429	51571	LOC51571	FAM49B	Multiple
3676_at	0.484842	5.32573	6.76121	8.37228e-09	7.69711e-07	9.90772	3676	LOC3676	ITGA4	Multiple
9840_at	0.484941	3.31659	8.37553	1.7942e-11	3.50738e-09	15.9348	9840	LOC9840	TESPA1	NA
8869_at	0.485642	6.86427	3.98978	0.000193023	0.0052407	0.164956	8869	LOC8869	ST3GAL5	NA
4261_at	0.485864	4.19689	7.57749	3.72049e-10	5.35606e-08	12.9596	4261	LOC4261	CIITA	NA
3458_at	0.486372	2.66637	6.97456	3.71294e-09	3.78863e-07	10.7041	3458	LOC3458	IFNG	Lymphoid
50615_at	0.489508	4.02313	6.44344	2.80116e-08	2.19495e-06	8.72591	50615	LOC50615	IL21R	Multiple
79180_at	0.490017	5.61227	6.3714	3.68037e-08	2.78972e-06	8.45899	79180	LOC79180	EFHD2	Multiple
5734_at	0.490855	4.48377	7.28998	1.11431e-09	1.36143e-07	11.8838	5734	LOC5734	PTGER4	NA
9332_at	0.491069	8.9298	3.34135	0.00148531	0.0269899	-1.76126	9332	LOC9332	CD163	NA
199_at	0.491144	8.62002	6.56381	1.77385e-08	1.45762e-06	9.17283	199	LOC199	AIF1	Myeloid
729230_at	0.491677	3.81895	7.19178	1.62095e-09	1.92966e-07	11.5164	729230	LOC729230	CCR2	NA
3603_at	0.493562	4.64804	7.76894	1.7937e-10	2.84719e-08	13.6753	3603	LOC3603	IL16	Multiple
153020_at	0.493781	4.70682	7.12973	2.05407e-09	2.39913e-07	11.2842	153020	LOC153020	RASGEF1B	NA
3684_at	0.494293	4.88207	3.78835	0.000370904	0.00897814	-0.455342	3684	LOC3684	ITGAM	Multiple
4481_at	0.49433	6.54925	4.38178	5.18647e-05	0.00164646	1.42115	4481	LOC4481	MSR1	NA
3932_at	0.495437	3.62818	13.8949	7.61164e-20	7.43978e-17	34.7692	3932	LOC3932	LCK	Lymphoid
121599_at	0.4969	2.55512	4.10871	0.0001303	0.00374003	0.539553	121599	LOC121599	SPIC	NA
139716_at	0.497106	4.22407	5.34944	1.67011e-06	8.29296e-05	4.73999	139716	LOC139716	GAB3	NA
23533_at	0.498304	4.81875	5.73964	3.95356e-07	2.30161e-05	6.14162	23533	LOC23533	PIK3R5	Multiple
9760_at	0.499965	3.16921	5.19341	2.94949e-06	0.000135918	4.18804	9760	LOC9760	TOX	NA
4689_at	0.501265	5.81852	4.53603	3.04938e-05	0.00104591	1.93134	4689	LOC4689	NCF4	Neutrophil
3134_at	0.501286	7.97839	7.90902	1.05249e-10	1.74516e-08	14.1985	3134	LOC3134	HLA-F	NA
94039_at	0.501516	4.88804	6.6064	1.50879e-08	1.28531e-06	9.3312	94039	LOC94039	ZNF101	Lymphoid
84166_at	0.502567	4.25061	6.98142	3.61695e-09	3.71107e-07	10.7298	84166	LOC84166	NLRC5	Multiple
3007_at	0.503938	6.40013	5.65987	5.3178e-07	2.96567e-05	5.8529	3007	LOC3007	HIST1H1D	NA
29126_at	0.506103	3.84207	3.83812	0.000316108	0.00790099	-0.303803	29126	LOC29126	CD274	Myeloid
63940_at	0.506193	5.47439	5.84926	2.62679e-07	1.60997e-05	6.54007	63940	LOC63940	GPSM3	NA
55840_at	0.506844	4.40691	3.68489	0.000515413	0.0117301	-0.766613	55840	LOC55840	EAF2	B Cell
5552_at	0.507681	8.36475	3.62487	0.000622492	0.0136808	-0.944781	5552	LOC5552	SRGN	NA
719_at	0.510399	7.68459	4.93223	7.55621e-06	0.000303081	3.27701	719	LOC719	C3AR1	NA
968_at	0.511059	8.46132	5.09466	4.21682e-06	0.000183828	3.84157	968	LOC968	CD68	NA
8673_at	0.511221	8.78213	4.36575	5.47841e-05	0.00172148	1.36861	8673	LOC8673	VAMP8	NA
23643_at	0.51323	7.49975	3.28272	0.00176951	0.0310895	-1.92466	23643	LOC23643	LY96	Multiple
3903_at	0.514294	5.03764	6.27512	5.29779e-08	3.82822e-06	8.10292	3903	LOC3903	LAIR1	NA
11025_at	0.514758	6.93738	4.79144	1.24644e-05	0.000470017	2.79344	11025	LOC11025	LILRB3	NA
51296_at	0.515226	5.22177	7.74524	1.96313e-10	3.03811e-08	13.5868	51296	LOC51296	SLC15A3	Myeloid
7097_at	0.515463	4.51738	4.93427	7.5013e-06	0.000302183	3.28406	7097	LOC7097	TLR2	Myeloid
6039_at	0.516426	6.61314	4.88958	8.79789e-06	0.000345424	3.12992	6039	LOC6039	RNASE6	Multiple
28803_at	0.516981	3.10364	3.94895	0.000220631	0.00581182	0.0377549	28803	LOC28803	IGLV3-10	B Cell
201799_at	0.517493	3.69329	3.48481	0.000961037	0.0190705	-1.35346	201799	LOC201799	TMEM154	Myeloid
283420_at	0.522153	3.58779	5.14555	3.50831e-06	0.000156617	4.01982	283420	LOC283420	CLEC9A	NA
1075_at	0.524958	6.97611	5.77735	3.43536e-07	2.03828e-05	6.27851	1075	LOC1075	CTSC	Multiple
79899_at	0.529027	3.90057	5.67227	5.07873e-07	2.85809e-05	5.89769	79899	LOC79899	PRR5L	NA
3766_at	0.530493	2.72284	5.46331	1.09959e-06	5.75227e-05	5.14611	3766	LOC3766	KCNJ10	NA
10538_at	0.531108	4.38789	7.96641	8.46142e-11	1.44162e-08	14.4126	10538	LOC10538	BATF	Lymphoid
10170_at	0.531797	3.67709	4.91439	8.05324e-06	0.00032025	3.21541	10170	LOC10170	DHRS9	NA
51703_at	0.532172	5.76914	5.86771	2.45178e-07	1.51269e-05	6.6073	51703	LOC51703	ACSL5	NA
54900_at	0.532995	3.92627	6.37723	3.60007e-08	2.74004e-06	8.48055	54900	LOC54900	LAX1	NA
645784_at	0.533405	2.91507	3.66467	0.000549343	0.0123959	-0.826823	645784	LOC645784	ANKRD36BP2	NA
3988_at	0.534542	8.30996	5.59423	6.78242e-07	3.69373e-05	5.6161	3988	LOC3988	LIPA	NA
27036_at	0.535183	4.36243	4.38023	5.214e-05	0.00165237	1.41607	27036	LOC27036	SIGLEC7	NA
91543_at	0.535322	4.87727	3.06981	0.0032932	0.0474093	-2.50125	91543	LOC91543	RSAD2	Myeloid
4332_at	0.536919	8.6508	4.14977	0.000113635	0.00334439	0.670222	4332	LOC4332	MNDA	Myeloid
120425_at	0.537035	5.61602	4.61299	2.33331e-05	0.000819128	2.18892	120425	LOC120425	AMICA1	Myeloid
8345_at	0.537987	5.3915	3.96499	0.000209362	0.00557827	0.0876269	8345	LOC8345	HIST1H2BH	NA
5920_at	0.538446	9.24766	5.30014	1.99988e-06	9.72244e-05	4.56503	5920	LOC5920	RARRES3	NA
1380_at	0.538529	2.64116	3.3758	0.00133906	0.025005	-1.66435	1380	LOC1380	CR2	NA
57552_at	0.540354	6.57943	3.4605	0.00103532	0.020239	-1.42334	57552	LOC57552	NCEH1	Myeloid
83593_at	0.540394	4.31482	7.53293	4.40973e-10	6.15738e-08	12.7929	83593	LOC83593	RASSF5	Multiple
100049587_at	0.541894	5.28536	4.08261	0.000142101	0.00402279	0.456828	100049587	LOC100049587	SIGLEC14	NA
80380_at	0.546422	4.47043	4.91216	8.11746e-06	0.000322114	3.20773	80380	LOC80380	PDCD1LG2	Dendritic Cell
10788_at	0.546722	5.84345	5.17867	3.11156e-06	0.000142327	4.13617	10788	LOC10788	IQGAP2	NA
4067_at	0.547725	7.02327	5.50218	9.5294e-07	5.07697e-05	5.28529	4067	LOC4067	LYN	Myeloid
10437_at	0.549144	10.8844	6.64663	1.29481e-08	1.13424e-06	9.48088	10437	LOC10437	IFI30	NA
10993_at	0.549489	4.97555	4.87471	9.27626e-06	0.000361152	3.07876	10993	LOC10993	SDS	NA
4046_at	0.549984	6.74559	4.65351	2.0252e-05	0.000726063	2.32533	4046	LOC4046	LSP1	Multiple
116984_at	0.550128	5.08702	6.47479	2.4871e-08	1.96544e-06	8.84221	116984	LOC116984	ARAP2	NA
3113_at	0.550359	10.2411	8.37765	1.77987e-11	3.50738e-09	15.9426	3113	LOC3113	HLA-DPA1	Multiple
6507_at	0.551154	5.28025	5.69658	4.64011e-07	2.65143e-05	5.98565	6507	LOC6507	SLC1A3	NA
79626_at	0.551633	5.42777	7.07722	2.5098e-09	2.77437e-07	11.0879	79626	LOC79626	TNFAIP8L2	NA
26034_at	0.552304	3.98318	8.82379	3.31873e-12	7.80153e-10	17.5911	26034	LOC26034	IPCEF1	NA
54504_at	0.553109	9.37193	6.14364	8.70157e-08	5.98507e-06	7.61816	54504	LOC54504	CPVL	Myeloid
28774_at	0.555931	3.76573	4.0903	0.000138524	0.00393296	0.481147	28774	LOC28774	IGLV8-61	B Cell
3106_at	0.556007	9.8163	6.78784	7.5647e-09	7.0595e-07	10.007	3106	LOC3106	HLA-B	NA
7096_at	0.557691	5.33507	5.11453	3.92479e-06	0.00017231	3.91111	7096	LOC7096	TLR1	Myeloid
11184_at	0.558169	4.09996	12.7841	2.73395e-18	1.81329e-15	31.2933	11184	LOC11184	MAP4K1	Lymphoid
10659_at	0.5582	5.49221	6.21725	6.59221e-08	4.63727e-06	7.88933	10659	LOC10659	CELF2	Multiple
219285_at	0.561184	6.04659	6.91518	4.65646e-09	4.63725e-07	10.4823	219285	LOC219285	SAMD9L	Multiple
80896_at	0.561718	5.98034	4.20824	9.34138e-05	0.00278905	0.857514	80896	LOC80896	NPL	Myeloid
80833_at	0.562472	8.12557	7.08783	2.41018e-09	2.69636e-07	11.1275	80833	LOC80833	APOL3	NA
3687_at	0.563175	4.30825	5.60982	6.40209e-07	3.50717e-05	5.67226	3687	LOC3687	ITGAX	Myeloid
50856_at	0.566027	5.23675	4.10042	0.000133943	0.00383276	0.513232	50856	LOC50856	CLEC4A	Myeloid
834_at	0.567069	6.58559	7.03814	2.91334e-09	3.08703e-07	10.9417	834	LOC834	CASP1	Monocyte
2219_at	0.568812	4.25886	3.11074	0.00292789	0.0437793	-2.39251	2219	LOC2219	FCN1	Myeloid
3824_at	0.569627	3.88845	5.97012	1.67083e-07	1.06997e-05	6.98133	3824	LOC3824	KLRD1	Lymphoid
3055_at	0.571148	5.09182	6.57868	1.67646e-08	1.39612e-06	9.22809	3055	LOC3055	HCK	Myeloid
64231_at	0.571379	7.335	5.65794	5.35609e-07	2.97808e-05	5.84592	64231	LOC64231	MS4A6A	Monocyte
55016_at	0.571593	6.67737	6.65058	1.27552e-08	1.12264e-06	9.49557	55016	LOC55016	MAR1	Multiple
6890_at	0.571723	6.57388	6.81708	6.76748e-09	6.37964e-07	10.1161	6890	LOC6890	TAP1	Multiple
1230_at	0.572371	5.6462	4.02835	0.000170029	0.00467794	0.28576	1230	LOC1230	CCR1	Multiple
29851_at	0.572922	4.53904	8.18749	3.65591e-11	6.85797e-09	15.2362	29851	LOC29851	ICOS	T Cell
10855_at	0.573081	4.99911	5.29884	2.00942e-06	9.74332e-05	4.56041	10855	LOC10855	HPSE	Myeloid
1731_at	0.575297	4.01152	9.55203	2.21483e-13	6.97145e-11	20.2469	1731	LOC1731	SEPT1	Lymphoid
3394_at	0.575642	6.73679	6.88347	5.25472e-09	5.05624e-07	10.3639	3394	LOC3394	IRF8	Multiple
7305_at	0.576335	9.51364	6.62238	1.41988e-08	1.22799e-06	9.39064	7305	LOC7305	TYROBP	NA
5698_at	0.576469	9.38229	6.42559	2.99732e-08	2.33879e-06	8.65972	5698	LOC5698	PSMB9	NA
3107_at	0.577329	8.65641	3.91044	0.000250135	0.00645485	-0.0815642	3107	LOC3107	HLA-C	NA
9056_at	0.577347	6.59148	3.55875	0.000764991	0.015911	-1.13898	9056	LOC9056	SLC7A7	NA
28395_at	0.58129	4.35193	4.22163	8.92989e-05	0.00267911	0.900603	28395	LOC28395	IGHV4-34	B Cell
6351_at	0.582582	8.09389	5.32159	1.84918e-06	9.061e-05	4.64109	6351	LOC6351	CCL4	Multiple
6850_at	0.584036	5.93316	6.32704	4.35325e-08	3.22089e-06	8.29484	6850	LOC6850	SYK	Multiple
64581_at	0.58601	4.82989	5.55459	7.85326e-07	4.21511e-05	5.47346	64581	LOC64581	CLEC7A	Myeloid
9404_at	0.590706	4.40098	8.16715	3.94889e-11	7.33349e-09	15.1605	9404	LOC9404	LPXN	Multiple
1236_at	0.590856	3.47539	6.34531	4.06248e-08	3.02989e-06	8.36242	1236	LOC1236	CCR7	Multiple
3115_at	0.590933	9.00564	8.4744	1.23511e-11	2.52058e-09	16.3013	3115	LOC3115	HLA-DPB1	NA
23495_at	0.591778	4.18402	5.03552	5.21821e-06	0.000222776	3.63522	23495	LOC23495	TNFRSF13B	NA
80774_at	0.591857	7.30379	7.97006	8.34501e-11	1.43495e-08	14.4262	80774	LOC80774	LIMD2	NA
5724_at	0.593786	4.9798	5.97802	1.62201e-07	1.04591e-05	7.01027	5724	LOC5724	PTAFR	Myeloid
28797_at	0.596094	4.72461	4.56208	2.7858e-05	0.000961496	2.01831	28797	LOC28797	IGLV3-19	B Cell
11006_at	0.596118	4.23498	5.82326	2.89469e-07	1.76254e-05	6.4454	11006	LOC11006	LILRB4	NA
8477_at	0.597337	4.24046	6.73719	9.17411e-09	8.31085e-07	9.81818	8477	LOC8477	GPR65	Multiple
951_at	0.60182	5.52379	6.10822	9.94373e-08	6.7396e-06	7.48786	951	LOC951	CD37	Multiple
51056_at	0.602767	7.09295	7.35106	8.82602e-10	1.12266e-07	12.1124	51056	LOC51056	LAP3	NA
100506736_at	0.604888	3.55646	9.19994	8.15007e-13	2.22581e-10	18.9689	100506736	LOC100506736	SLFN12L	NA
1880_at	0.605169	4.73871	4.77415	1.32502e-05	0.000493125	2.73443	1880	LOC1880	GPR183	Multiple
942_at	0.60664	4.91563	6.74209	9.00446e-09	8.19715e-07	9.83645	942	LOC942	CD86	Dendritic Cell
1794_at	0.607571	4.81741	7.60026	3.41117e-10	5.10878e-08	13.0447	1794	LOC1794	DOCK2	Multiple
51237_at	0.609423	3.00029	4.0705	0.000147923	0.00416223	0.418529	51237	LOC51237	MZB1	B Cell
79961_at	0.609627	7.10204	5.80135	3.14137e-07	1.88797e-05	6.36569	79961	LOC79961	DENND2D	Lymphoid
201633_at	0.60999	3.30184	11.5388	1.8288e-16	8.70839e-14	27.1966	201633	LOC201633	TIGIT	Lymphoid
5366_at	0.610157	4.94732	3.41026	0.0012065	0.0228632	-1.56678	5366	LOC5366	PMAIP1	Multiple
9450_at	0.612301	5.07459	4.50178	3.43316e-05	0.00115293	1.81736	9450	LOC9450	LY86	NA
80231_at	0.612617	3.51346	6.2721	5.35864e-08	3.84229e-06	8.09176	80231	LOC80231	CXORF21	NA
89857_at	0.613559	4.19784	7.90093	1.08537e-10	1.78375e-08	14.1683	89857	LOC89857	KLHL6	Multiple
717_at	0.614418	5.95089	3.90587	0.000253876	0.00653915	-0.0956702	717	LOC717	C2	NA
3659_at	0.616867	5.27657	11.9584	4.34071e-17	2.44277e-14	28.6003	3659	LOC3659	IRF1	Multiple
3122_at	0.618212	10.1608	7.12621	2.08186e-09	2.40137e-07	11.2711	3122	LOC3122	HLA-DRA	NA
712_at	0.618601	6.08941	6.2862	5.08043e-08	3.71451e-06	8.14386	712	LOC712	C1QA	NA
1439_at	0.619121	6.01671	5.07079	4.59601e-06	0.000198957	3.75817	1439	LOC1439	CSF2RB	Multiple
944_at	0.620704	3.98446	9.09745	1.19341e-12	3.07817e-10	18.5947	944	LOC944	TNFSF8	Multiple
3702_at	0.622205	3.33543	13.2325	6.32083e-19	4.34756e-16	32.7165	3702	LOC3702	ITK	Lymphoid
9308_at	0.622481	5.84155	5.52935	8.62064e-07	4.61366e-05	5.38276	9308	LOC9308	CD83	Multiple
2841_at	0.622691	4.55895	8.15173	4.18668e-11	7.69811e-09	15.1031	2841	LOC2841	GPR18	Lymphoid
9262_at	0.623042	5.72048	7.4589	5.84863e-10	7.87064e-08	12.5159	9262	LOC9262	STK17B	Multiple
8354_at	0.624338	5.17288	4.4001	4.87124e-05	0.00156241	1.48131	8354	LOC8354	HIST1H3I	NA
64407_at	0.62593	5.48705	3.82283	0.000332056	0.00820028	-0.350483	64407	LOC64407	RGS18	Myeloid
81704_at	0.626371	5.10243	8.63849	6.65557e-12	1.47144e-09	16.9081	81704	LOC81704	DOCK8	Multiple
7453_at	0.627085	7.26084	6.9162	4.63834e-09	4.63725e-07	10.4861	7453	LOC7453	WARS	NA
26191_at	0.629566	3.19837	6.89774	4.97645e-09	4.88916e-07	10.4172	26191	LOC26191	PTPN22	Multiple
864_at	0.632757	4.54141	10.9296	1.53538e-15	6.48035e-13	25.117	864	LOC864	RUNX3	Multiple
920_at	0.633206	6.54834	6.74468	8.91592e-09	8.15653e-07	9.84613	920	LOC920	CD4	NA
154075_at	0.636065	3.8462	11.0896	8.74223e-16	3.86552e-13	25.6678	154075	LOC154075	SAMD3	Lymphoid
118788_at	0.637006	7.04214	4.92741	7.68755e-06	0.000307022	3.26035	118788	LOC118788	PIK3AP1	NA
7351_at	0.637335	7.24861	7.35468	8.70506e-10	1.11491e-07	12.1259	7351	LOC7351	UCP2	Multiple
2123_at	0.638052	7.63693	4.83814	1.05636e-05	0.000407851	2.95321	2123	LOC2123	EVI2A	Multiple
2214_at	0.638825	8.80504	4.79446	1.23322e-05	0.000467389	2.80373	2214	LOC2214	FCGR3A	NA
91526_at	0.639101	4.76352	7.59101	3.53359e-10	5.20813e-08	13.0101	91526	LOC91526	ANKRD44	Multiple
64174_at	0.639654	4.61871	4.52963	3.11775e-05	0.00106433	1.91002	64174	LOC64174	DPEP2	Myeloid
6775_at	0.639671	4.3355	6.93752	4.27612e-09	4.33944e-07	10.5658	6775	LOC6775	STAT4	Lymphoid
4973_at	0.641904	5.0297	3.21778	0.00214392	0.0355806	-2.10336	4973	LOC4973	OLR1	NA
128346_at	0.644509	7.43037	6.78391	7.67886e-09	7.1302e-07	9.99238	128346	LOC128346	C1ORF162	Myeloid
713_at	0.648077	8.87704	5.62593	6.03124e-07	3.34347e-05	5.73034	713	LOC713	C1QB	NA
714_at	0.648091	7.95677	6.23157	6.24518e-08	4.44365e-06	7.94216	714	LOC714	C1QC	NA
26157_at	0.648966	6.59568	7.0467	2.81976e-09	3.02692e-07	10.9737	26157	LOC26157	GIMAP2	Multiple
4542_at	0.649752	5.86709	6.69254	1.08733e-08	9.70811e-07	9.65182	4542	LOC4542	MYO1F	Multiple
149628_at	0.649914	4.58341	12.7288	3.28151e-18	2.10141e-15	31.1157	149628	LOC149628	PYHIN1	NA
7409_at	0.650144	4.63138	8.61462	7.28114e-12	1.5908e-09	16.8199	7409	LOC7409	VAV1	NA
10154_at	0.650219	5.28637	8.07127	5.68144e-11	1.00486e-08	14.8035	10154	LOC10154	PLXNC1	Multiple
84868_at	0.65068	6.48712	4.60862	2.36916e-05	0.000828582	2.17424	84868	LOC84868	HAVCR2	NA
926_at	0.650699	3.09287	10.6193	4.61604e-15	1.82392e-12	24.0399	926	LOC926	CD8B	T Cell
29121_at	0.65248	5.14014	9.70953	1.24145e-13	4.11697e-11	20.8146	29121	LOC29121	CLEC2D	Multiple
5294_at	0.653482	5.32416	9.00248	1.70069e-12	4.21113e-10	18.2471	5294	LOC5294	PIK3CG	Multiple
1318_at	0.654779	5.59436	9.15161	9.75468e-13	2.58792e-10	18.7926	1318	LOC1318	SLC31A2	Myeloid
10859_at	0.656427	4.71548	8.08481	5.39685e-11	9.637e-09	14.8539	10859	LOC10859	LILRB1	Myeloid
10673_at	0.656799	7.20789	6.55436	1.83874e-08	1.50428e-06	9.13768	10673	LOC10673	TNFSF13B	Myeloid
9938_at	0.657447	6.35366	8.53618	9.7838e-12	2.04152e-09	16.53	9938	LOC9938	ARHGAP25	Multiple
79037_at	0.658503	6.69291	10.284	1.53642e-14	5.59469e-12	22.8624	79037	LOC79037	PVRIG	NA
10068_at	0.659386	6.20077	7.2558	1.26956e-09	1.5211e-07	11.7559	10068	LOC10068	IL18BP	NA
9050_at	0.660114	3.77968	6.33474	4.22835e-08	3.14099e-06	8.3233	9050	LOC9050	PSTPIP2	NA
2650_at	0.660746	5.01898	6.0601	1.1917e-07	7.87582e-06	7.31113	2650	LOC2650	GCNT1	NA
117289_at	0.661975	4.37923	7.97851	8.08121e-11	1.41581e-08	14.4577	117289	LOC117289	TAGAP	NA
313_at	0.664976	6.39816	7.26656	1.21848e-09	1.47897e-07	11.7962	313	LOC313	AOAH	NA
10875_at	0.665033	7.53904	6.62933	1.38289e-08	1.20571e-06	9.41648	10875	LOC10875	FGL2	Myeloid
57705_at	0.667706	5.73195	9.17273	9.01769e-13	2.42707e-10	18.8697	57705	LOC57705	WDFY4	NA
2359_at	0.669708	6.717	6.41348	3.13804e-08	2.42819e-06	8.61485	2359	LOC2359	FPR3	Myeloid
10870_at	0.671331	5.35005	7.85154	1.30972e-10	2.13358e-08	13.9839	10870	LOC10870	HCST	Multiple
10225_at	0.674086	3.86295	13.545	2.3122e-19	1.95182e-16	33.6924	10225	LOC10225	CD96	Lymphoid
7940_at	0.674144	7.45046	6.14733	8.58149e-08	5.94652e-06	7.63173	7940	LOC7940	LST1	Myeloid
7805_at	0.675159	9.01398	6.5448	1.90669e-08	1.53732e-06	9.10218	7805	LOC7805	LAPTM5	Multiple
64218_at	0.678242	3.72495	11.1252	7.71481e-16	3.49443e-13	25.7901	64218	LOC64218	SEMA4A	NA
[truncated: 144 more rows]

## Sheet: S8 Screen_CD3TCR_IRIS-Summary
IRIS_Most_Specific	PositiveAssociation, N=1011	NegativeAssociation, N=325
[truncated: 10 more rows]

[truncated: 5 more sheets: S9 Screen_CD3TCR_NegIRIS, S10 Week4_CD3TCR_27hi_all, S11 Week4_CD3TCR_27hi_210sig, S12 Week4_CD3TCR_hallmarkIFNG, S13 Screen_OddsRatio]
